# Supplementary material
Source: publisher figshare collection journal article supplement (https://acs.figshare.com/ndownloader/files/7826410)
Supplement: Supplementary file 1 [file 7826410]

data_z1020c_0m

_audit_creation_method           SHELXL-2016/6
_shelx_SHELXL_version_number     2016/6
_chemical_name_systematic        ?
_chemical_name_common            ?
_chemical_melting_point          ?
_chemical_formula_moiety         'C54 H56 N8 Ru, 2(F6 P), 2(C H2 Cl2)'
_chemical_formula_sum            'C56 H60 Cl4 F12 N8 P2 Ru'
_chemical_formula_weight         1377.93

loop_
_atom_type_symbol
_atom_type_description
_atom_type_scat_dispersion_real
_atom_type_scat_dispersion_imag
_atom_type_scat_source
C C 0.0033 0.0016 'International Tables Vol C Tables 4.2.6.8 and 6.1.1.4'
H H 0.0000 0.0000 'International Tables Vol C Tables 4.2.6.8 and 6.1.1.4'
F F 0.0171 0.0103 'International Tables Vol C Tables 4.2.6.8 and 6.1.1.4'
N N 0.0061 0.0033 'International Tables Vol C Tables 4.2.6.8 and 6.1.1.4'
P P 0.1023 0.0942 'International Tables Vol C Tables 4.2.6.8 and 6.1.1.4'
Ru Ru -1.2594 0.8363 'International Tables Vol C Tables 4.2.6.8 and 6.1.1.4'
Cl Cl 0.1484 0.1585 'International Tables Vol C Tables 4.2.6.8 and 6.1.1.4'

_space_group_crystal_system      monoclinic
_space_group_IT_number           15
_space_group_name_H-M_alt        'C 2/c'
_space_group_name_Hall           '-C 2yc'

_shelx_space_group_comment       
; 
The symmetry employed for this shelxl refinement is uniquely defined 
by the following loop, which should always be used as a source of 
symmetry information in preference to the above space-group names. 
They are only intended as comments. 
;

loop_
_space_group_symop_operation_xyz
'x, y, z'
'-x, y, -z+1/2'
'x+1/2, y+1/2, z'
'-x+1/2, y+1/2, -z+1/2'
'-x, -y, -z'
'x, -y, z-1/2'
'-x+1/2, -y+1/2, -z'
'x+1/2, -y+1/2, z-1/2'

_cell_length_a                   19.8615(9)
_cell_length_b                   22.9601(10)
_cell_length_c                   13.8009(6)
_cell_angle_alpha                90
_cell_angle_beta                 95.504(2)
_cell_angle_gamma                90
_cell_volume                     6264.5(5)
_cell_formula_units_Z            4
_cell_measurement_temperature    230(2)
_cell_measurement_reflns_used    9919
_cell_measurement_theta_min      2.3120
_cell_measurement_theta_max      25.2569

_exptl_crystal_description       block
_exptl_crystal_colour            'pale yellow'
_exptl_crystal_density_meas      ?
_exptl_crystal_density_method    'not measured'
_exptl_crystal_density_diffrn    1.461
_exptl_crystal_F_000             2808
_exptl_transmission_factor_min   ?
_exptl_transmission_factor_max   ?
_exptl_crystal_size_max          0.62
_exptl_crystal_size_mid          0.13
_exptl_crystal_size_min          0.11
_exptl_absorpt_coefficient_mu    0.551
_shelx_estimated_absorpt_T_min   0.726
_shelx_estimated_absorpt_T_max   0.942
_exptl_absorpt_correction_type   multi-scan
_exptl_absorpt_correction_T_min  0.6888
_exptl_absorpt_correction_T_max  0.7452
_exptl_absorpt_process_details   
; 
 SADABS 2016/2: Krause, L., Herbst-Irmer, R., Sheldrick G.M. & Stalke D., 
 J. Appl. Cryst. 48 (2015) 3-10 
;
_exptl_absorpt_special_details   ?
_diffrn_ambient_temperature      230(2)
_diffrn_radiation_wavelength     0.71073
_diffrn_radiation_type           MoK\a
_diffrn_source                   'microfocus sealed X-ray tube'
_diffrn_measurement_device_type  'Bruker D8 QUEST area detector'
_diffrn_measurement_method       '\w and \f scans'
_diffrn_detector_area_resol_mean 7.9
_diffrn_reflns_number            47978
_diffrn_reflns_av_unetI/netI     0.0228
_diffrn_reflns_av_R_equivalents  0.0442
_diffrn_reflns_limit_h_min       -23
_diffrn_reflns_limit_h_max       23
_diffrn_reflns_limit_k_min       -27
_diffrn_reflns_limit_k_max       27
_diffrn_reflns_limit_l_min       -16
_diffrn_reflns_limit_l_max       16
_diffrn_reflns_theta_min         2.312
_diffrn_reflns_theta_max         25.297
_diffrn_reflns_theta_full        25.242
_diffrn_measured_fraction_theta_max 0.998
_diffrn_measured_fraction_theta_full 0.999
_diffrn_reflns_Laue_measured_fraction_max 0.998
_diffrn_reflns_Laue_measured_fraction_full 0.999
_diffrn_reflns_point_group_measured_fraction_max 0.998
_diffrn_reflns_point_group_measured_fraction_full 0.999
_reflns_number_total             5694
_reflns_number_gt                4994
_reflns_threshold_expression     'I > 2\s(I)'
_reflns_Friedel_coverage         0.000
_reflns_Friedel_fraction_max     .
_reflns_Friedel_fraction_full    .

_reflns_special_details          
; 
 Reflections were merged by SHELXL according to the crystal 
 class for the calculation of statistics and refinement. 
  
 _reflns_Friedel_fraction is defined as the number of unique 
 Friedel pairs measured divided by the number that would be 
 possible theoretically, ignoring centric projections and 
 systematic absences. 
;

_computing_data_collection       'APEX3 (Bruker AXS Inc., 2015)'
_computing_cell_refinement       'SAINT V8.37A (Bruker AXS Inc., 2015)'
_computing_data_reduction        'SAINT V8.37A (Bruker AXS Inc., 2015)'
_computing_structure_solution    'XT V2014/1 (Bruker AXS Inc., 2014)'
_computing_structure_refinement  'SHELXL-2016/6 (Sheldrick, 2016)'
_computing_molecular_graphics    'DIAMOND (Crystal Impact)'
_computing_publication_material  ?
_refine_special_details          
; 
;
_refine_ls_structure_factor_coef Fsqd
_refine_ls_matrix_type           full
_refine_ls_weighting_scheme      calc
_refine_ls_weighting_details     
'w=1/[\s^2^(Fo^2^)+(0.0416P)^2^+7.2035P] where P=(Fo^2^+2Fc^2^)/3'
_atom_sites_solution_primary     dual
_atom_sites_solution_secondary   difmap
_atom_sites_solution_hydrogens   geom
_refine_ls_hydrogen_treatment    constr
_refine_ls_extinction_method     none
_refine_ls_extinction_coef       .
_refine_ls_number_reflns         5694
_refine_ls_number_parameters     473
_refine_ls_number_restraints     191
_refine_ls_R_factor_all          0.0432
_refine_ls_R_factor_gt           0.0349
_refine_ls_wR_factor_ref         0.0896
_refine_ls_wR_factor_gt          0.0855
_refine_ls_goodness_of_fit_ref   1.069
_refine_ls_restrained_S_all      1.075
_refine_ls_shift/su_max          0.001
_refine_ls_shift/su_mean         0.000

loop_
_atom_site_label
_atom_site_type_symbol
_atom_site_fract_x
_atom_site_fract_y
_atom_site_fract_z
_atom_site_U_iso_or_equiv
_atom_site_adp_type
_atom_site_occupancy
_atom_site_site_symmetry_order
_atom_site_calc_flag
_atom_site_refinement_flags_posn
_atom_site_refinement_flags_adp
_atom_site_refinement_flags_occupancy
_atom_site_disorder_assembly
_atom_site_disorder_group
Ru1 Ru 0.500000 0.20497(2) 0.750000 0.03284(9) Uani 1 2 d S T P . .
C1 C 0.44065(11) 0.14710(10) 0.80656(16) 0.0385(5) Uani 1 1 d . . . . .
N2 N 0.43615(10) 0.11460(9) 0.88764(15) 0.0478(5) Uani 1 1 d . . . . .
C3 C 0.37393(14) 0.08630(13) 0.8842(2) 0.0625(8) Uani 1 1 d . . . . .
H3 H 0.359662 0.061568 0.932539 0.075 Uiso 1 1 calc R U . . .
C4 C 0.33837(13) 0.10008(11) 0.8016(2) 0.0577(7) Uani 1 1 d . . . . .
H4 H 0.294646 0.087169 0.779610 0.069 Uiso 1 1 calc R U . . .
N5 N 0.37922(9) 0.13783(8) 0.75365(15) 0.0416(4) Uani 1 1 d . . . . .
C6 C 0.36624(11) 0.16575(10) 0.66430(17) 0.0387(5) Uani 1 1 d . . . . .
N7 N 0.41709(9) 0.20110(8) 0.64394(13) 0.0371(4) Uani 1 1 d . . . . .
C8 C 0.40930(12) 0.23017(10) 0.55897(16) 0.0403(5) Uani 1 1 d . . . . .
H8 H 0.444494 0.254885 0.543662 0.048 Uiso 1 1 calc R U . . .
C9 C 0.35230(12) 0.22589(11) 0.49236(17) 0.0444(6) Uani 1 1 d . . . . .
C10 C 0.30141(12) 0.18823(11) 0.51636(19) 0.0479(6) Uani 1 1 d . . . . .
H10 H 0.262179 0.183556 0.473249 0.058 Uiso 1 1 calc R U . . .
C11 C 0.30815(12) 0.15798(11) 0.60234(19) 0.0466(6) Uani 1 1 d . . . . .
H11 H 0.273975 0.132504 0.618750 0.056 Uiso 1 1 calc R U . . .
C12 C 0.48768(13) 0.10992(11) 0.96780(18) 0.0476(6) Uani 1 1 d . . . . .
C13 C 0.54036(13) 0.07023(11) 0.96168(18) 0.0476(6) Uani 1 1 d . . . . .
C14 C 0.58897(14) 0.06666(12) 1.0404(2) 0.0547(7) Uani 1 1 d . . . . .
H14 H 0.625588 0.041055 1.036896 0.066 Uiso 1 1 calc R U . . .
C15 C 0.58569(16) 0.09913(13) 1.1235(2) 0.0629(8) Uani 1 1 d . . . . .
C16 C 0.53236(17) 0.13792(14) 1.1265(2) 0.0683(8) Uani 1 1 d . . . . .
H16 H 0.529919 0.160787 1.182519 0.082 Uiso 1 1 calc R U . . .
C17 C 0.48255(15) 0.14412(13) 1.0497(2) 0.0605(7) Uani 1 1 d . . . . .
C18 C 0.54367(15) 0.03130(12) 0.8751(2) 0.0574(7) Uani 1 1 d . . . . .
H18A H 0.581749 0.004934 0.886723 0.086 Uiso 1 1 calc R U . . .
H18B H 0.549252 0.054785 0.817989 0.086 Uiso 1 1 calc R U . . .
H18C H 0.502149 0.008979 0.864525 0.086 Uiso 1 1 calc R U . . .
C19 C 0.6380(2) 0.09143(17) 1.2094(2) 0.0928(12) Uani 1 1 d . . . . .
H19A H 0.634027 0.122894 1.255413 0.139 Uiso 1 1 calc R U . . .
H19B H 0.682873 0.091973 1.187115 0.139 Uiso 1 1 calc R U . . .
H19C H 0.630780 0.054483 1.240873 0.139 Uiso 1 1 calc R U . . .
C20 C 0.4244(2) 0.18644(17) 1.0553(3) 0.0908(12) Uani 1 1 d . . . . .
H20A H 0.434660 0.212635 1.109890 0.136 Uiso 1 1 calc R U . . .
H20B H 0.383414 0.164966 1.064153 0.136 Uiso 1 1 calc R U . . .
H20C H 0.418051 0.208801 0.995497 0.136 Uiso 1 1 calc R U . . .
C21 C 0.34692(13) 0.26023(13) 0.40069(18) 0.0506(6) Uani 1 1 d . . . . .
C22 C 0.37921(14) 0.31356(14) 0.3957(2) 0.0604(7) Uani 1 1 d . . . . .
H22 H 0.405702 0.327524 0.450972 0.072 Uiso 1 1 calc R U . . .
C23 C 0.37341(16) 0.34714(16) 0.3107(2) 0.0747(9) Uani 1 1 d . . . . .
C24 C 0.33271(17) 0.3248(2) 0.2309(2) 0.0812(11) Uani 1 1 d . . . . .
H24 H 0.328357 0.346297 0.172711 0.097 Uiso 1 1 calc R U . . .
C25 C 0.29885(17) 0.27276(18) 0.2341(2) 0.0742(10) Uani 1 1 d . . . . .
C26 C 0.30639(15) 0.24050(15) 0.31908(19) 0.0622(8) Uani 1 1 d . . . . .
H26 H 0.283806 0.204645 0.321923 0.075 Uiso 1 1 calc R U . . .
C27 C 0.4085(2) 0.40516(19) 0.3082(3) 0.1115(15) Uani 1 1 d . . . . .
H27A H 0.406196 0.419085 0.241597 0.167 Uiso 1 1 calc R U . . .
H27B H 0.455485 0.400875 0.333667 0.167 Uiso 1 1 calc R U . . .
H27C H 0.386458 0.432911 0.347706 0.167 Uiso 1 1 calc R U . . .
C28 C 0.2534(2) 0.2512(2) 0.1469(2) 0.1078(15) Uani 1 1 d . . . . .
H28A H 0.256898 0.209176 0.142459 0.162 Uiso 1 1 calc R U . . .
H28B H 0.267194 0.268796 0.088043 0.162 Uiso 1 1 calc R U . . .
H28C H 0.206890 0.261874 0.154406 0.162 Uiso 1 1 calc R U . . .
N29 N 0.54672(10) 0.27094(9) 0.67527(15) 0.0442(5) Uani 1 1 d . . . . .
C30 C 0.56653(15) 0.30690(12) 0.6296(2) 0.0587(7) Uani 1 1 d . . . . .
C31 C 0.5908(2) 0.35261(18) 0.5688(3) 0.1120(15) Uani 1 1 d . . . . .
H31A H 0.639742 0.351203 0.572221 0.168 Uiso 1 1 calc R U . . .
H31B H 0.576651 0.390237 0.591582 0.168 Uiso 1 1 calc R U . . .
H31C H 0.572046 0.346886 0.501905 0.168 Uiso 1 1 calc R U . . .
C1L C 0.6115(7) 0.5541(5) 0.3352(15) 0.108(4) Uani 0.531(16) 1 d D U P A 1
H1LA H 0.609257 0.541939 0.266830 0.130 Uiso 0.531(16) 1 calc R U P A 1
H1LB H 0.651447 0.535770 0.369577 0.130 Uiso 0.531(16) 1 calc R U P A 1
Cl1 Cl 0.5400(4) 0.5290(4) 0.3847(3) 0.156(2) Uani 0.531(16) 1 d D U P A 1
Cl2 Cl 0.6209(7) 0.6291(3) 0.3412(5) 0.146(3) Uani 0.531(16) 1 d D U P A 1
C1LA C 0.6293(9) 0.5625(7) 0.355(2) 0.146(7) Uani 0.469(16) 1 d D U P A 2
H1LC H 0.642922 0.541365 0.297890 0.176 Uiso 0.469(16) 1 calc R U P A 2
H1LD H 0.654587 0.546550 0.412988 0.176 Uiso 0.469(16) 1 calc R U P A 2
Cl1A Cl 0.5434(5) 0.5535(7) 0.3619(12) 0.302(6) Uani 0.469(16) 1 d D U P A 2
Cl2A Cl 0.6478(4) 0.6360(4) 0.3439(7) 0.135(2) Uani 0.469(16) 1 d D U P A 2
P1 P 0.7321(3) 0.4712(3) 0.5718(5) 0.0776(16) Uani 0.536(7) 1 d D . P B 1
F1 F 0.7467(3) 0.5102(3) 0.6647(6) 0.148(3) Uani 0.536(7) 1 d D . P B 1
F2 F 0.7253(3) 0.4194(3) 0.6428(5) 0.114(3) Uani 0.536(7) 1 d D . P B 1
F3 F 0.7167(3) 0.4313(5) 0.4817(4) 0.162(4) Uani 0.536(7) 1 d D . P B 1
F5 F 0.6542(3) 0.4798(3) 0.5698(7) 0.134(3) Uani 0.536(7) 1 d D . P B 1
F4 F 0.7384(5) 0.5282(5) 0.5119(9) 0.220(7) Uani 0.536(7) 1 d D . P B 1
F6 F 0.8098(3) 0.4567(4) 0.5763(4) 0.099(2) Uani 0.536(7) 1 d D . P B 1
P1A P 0.7301(3) 0.4694(3) 0.5520(6) 0.0706(17) Uani 0.464(7) 1 d D . P B 2
F1A F 0.7181(6) 0.5349(3) 0.5639(8) 0.159(5) Uani 0.464(7) 1 d D . P B 2
F2A F 0.7084(4) 0.4562(5) 0.6534(5) 0.136(3) Uani 0.464(7) 1 d D . P B 2
F3A F 0.7423(4) 0.4027(3) 0.5364(9) 0.154(4) Uani 0.464(7) 1 d D . P B 2
F5A F 0.6556(3) 0.4619(4) 0.5092(7) 0.116(3) Uani 0.464(7) 1 d D . P B 2
F4A F 0.7505(3) 0.4841(3) 0.4474(4) 0.097(2) Uani 0.464(7) 1 d D . P B 2
F6A F 0.8055(5) 0.4785(7) 0.5893(9) 0.209(6) Uani 0.464(7) 1 d D . P B 2

loop_
_atom_site_aniso_label
_atom_site_aniso_U_11
_atom_site_aniso_U_22
_atom_site_aniso_U_33
_atom_site_aniso_U_23
_atom_site_aniso_U_13
_atom_site_aniso_U_12
Ru1 0.03175(14) 0.03380(14) 0.03226(14) 0.000 -0.00061(9) 0.000
C1 0.0371(12) 0.0370(12) 0.0417(13) 0.0032(10) 0.0055(10) 0.0086(9)
N2 0.0419(11) 0.0503(12) 0.0523(12) 0.0172(10) 0.0105(9) 0.0079(9)
C3 0.0481(16) 0.0605(17) 0.081(2) 0.0319(16) 0.0160(14) 0.0014(13)
C4 0.0387(14) 0.0519(15) 0.083(2) 0.0199(14) 0.0111(13) -0.0033(12)
N5 0.0333(10) 0.0396(10) 0.0518(12) 0.0082(9) 0.0038(8) -0.0009(8)
C6 0.0335(12) 0.0382(12) 0.0444(13) -0.0008(10) 0.0035(10) 0.0008(9)
N7 0.0344(10) 0.0388(10) 0.0372(10) -0.0016(8) -0.0002(8) -0.0008(8)
C8 0.0371(12) 0.0472(13) 0.0361(12) -0.0002(10) 0.0006(9) -0.0031(10)
C9 0.0408(13) 0.0545(14) 0.0370(12) -0.0048(11) -0.0010(10) 0.0053(11)
C10 0.0333(12) 0.0596(15) 0.0489(14) -0.0096(12) -0.0061(10) -0.0005(11)
C11 0.0345(12) 0.0470(13) 0.0576(16) -0.0037(12) 0.0007(11) -0.0051(10)
C12 0.0489(14) 0.0526(14) 0.0426(14) 0.0168(11) 0.0109(11) 0.0087(12)
C13 0.0487(14) 0.0484(14) 0.0471(14) 0.0150(11) 0.0116(11) 0.0053(11)
C14 0.0512(15) 0.0551(15) 0.0581(17) 0.0211(13) 0.0062(12) 0.0074(12)
C15 0.073(2) 0.0665(18) 0.0489(16) 0.0230(14) 0.0033(14) -0.0048(15)
C16 0.095(2) 0.073(2) 0.0391(15) 0.0075(14) 0.0188(15) 0.0025(18)
C17 0.0709(19) 0.0659(18) 0.0481(16) 0.0163(14) 0.0230(14) 0.0137(15)
C18 0.0603(17) 0.0550(16) 0.0573(16) 0.0068(13) 0.0072(13) 0.0123(13)
C19 0.114(3) 0.096(3) 0.062(2) 0.0274(19) -0.023(2) -0.016(2)
C20 0.112(3) 0.093(2) 0.073(2) 0.0104(19) 0.039(2) 0.044(2)
C21 0.0412(14) 0.0698(18) 0.0398(13) 0.0016(12) -0.0009(11) 0.0089(12)
C22 0.0509(16) 0.084(2) 0.0457(15) 0.0106(14) 0.0009(12) 0.0060(15)
C23 0.0629(19) 0.098(2) 0.065(2) 0.0256(18) 0.0161(16) 0.0116(18)
C24 0.070(2) 0.132(3) 0.0429(17) 0.0245(19) 0.0114(15) 0.035(2)
C25 0.067(2) 0.115(3) 0.0387(16) 0.0000(17) -0.0031(14) 0.029(2)
C26 0.0570(17) 0.085(2) 0.0426(15) -0.0076(14) -0.0072(12) 0.0172(15)
C27 0.111(3) 0.118(3) 0.109(3) 0.053(3) 0.030(3) 0.001(3)
C28 0.106(3) 0.165(4) 0.0465(19) -0.012(2) -0.0236(19) 0.038(3)
N29 0.0395(11) 0.0453(11) 0.0464(12) 0.0002(10) -0.0033(9) -0.0066(9)
C30 0.0547(17) 0.0561(17) 0.0640(18) 0.0061(14) -0.0012(14) -0.0174(13)
C31 0.117(3) 0.099(3) 0.120(3) 0.042(3) 0.013(3) -0.050(3)
C1L 0.136(10) 0.098(6) 0.087(7) -0.025(5) -0.013(8) 0.044(6)
Cl1 0.161(4) 0.182(5) 0.123(4) -0.009(2) 0.000(2) 0.017(3)
Cl2 0.257(8) 0.087(2) 0.087(2) 0.0007(18) -0.014(4) 0.066(3)
C1LA 0.169(11) 0.135(9) 0.129(16) 0.013(12) -0.023(12) 0.056(9)
Cl1A 0.140(5) 0.253(10) 0.491(17) -0.009(9) -0.076(7) 0.013(5)
Cl2A 0.146(4) 0.130(3) 0.116(3) -0.036(2) -0.057(3) 0.039(3)
P1 0.065(2) 0.087(2) 0.077(2) 0.0138(15) -0.0117(15) -0.0283(17)
F1 0.136(5) 0.132(5) 0.170(6) -0.074(5) -0.023(4) -0.008(4)
F2 0.083(3) 0.121(4) 0.129(5) 0.059(4) -0.028(3) -0.036(3)
F3 0.116(5) 0.278(10) 0.090(4) -0.097(6) -0.002(3) -0.048(6)
F5 0.062(3) 0.119(4) 0.215(8) -0.017(5) -0.015(4) 0.011(3)
F4 0.189(8) 0.204(9) 0.243(11) 0.158(9) -0.099(8) -0.124(7)
F6 0.058(3) 0.189(6) 0.052(2) -0.010(3) 0.010(2) 0.001(3)
P1A 0.046(2) 0.078(3) 0.090(4) 0.025(2) 0.015(2) -0.0078(19)
F1A 0.241(9) 0.066(4) 0.188(9) -0.041(4) 0.119(8) -0.061(4)
F2A 0.150(7) 0.183(9) 0.082(4) 0.042(5) 0.050(4) -0.011(6)
F3A 0.145(7) 0.086(4) 0.243(10) 0.063(4) 0.077(6) 0.046(4)
F5A 0.073(3) 0.105(5) 0.165(7) 0.064(5) -0.015(4) -0.031(3)
F4A 0.071(3) 0.126(5) 0.098(4) 0.047(3) 0.033(3) 0.021(3)
F6A 0.095(6) 0.318(14) 0.202(11) 0.129(10) -0.044(6) -0.117(7)

_geom_special_details            
; 
 All esds (except the esd in the dihedral angle between two l.s. planes) 
 are estimated using the full covariance matrix.  The cell esds are taken 
 into account individually in the estimation of esds in distances, angles 
 and torsion angles; correlations between esds in cell parameters are only 
 used when they are defined by crystal symmetry.  An approximate (isotropic) 
 treatment of cell esds is used for estimating esds involving l.s. planes. 
;

loop_
_geom_bond_atom_site_label_1
_geom_bond_atom_site_label_2
_geom_bond_distance
_geom_bond_site_symmetry_2
_geom_bond_publ_flag
Ru1 C1 1.985(2) . ?
Ru1 C1 1.985(2) 2_656 ?
Ru1 N7 2.0975(18) 2_656 ?
Ru1 N7 2.0976(18) . ?
Ru1 N29 2.098(2) 2_656 ?
Ru1 N29 2.098(2) . ?
C1 N2 1.355(3) . ?
C1 N5 1.377(3) . ?
N2 C3 1.393(3) . ?
N2 C12 1.437(3) . ?
C3 C4 1.321(4) . ?
C3 H3 0.9400 . ?
C4 N5 1.396(3) . ?
C4 H4 0.9400 . ?
N5 C6 1.392(3) . ?
C6 N7 1.346(3) . ?
C6 C11 1.380(3) . ?
N7 C8 1.345(3) . ?
C8 C9 1.392(3) . ?
C8 H8 0.9400 . ?
C9 C10 1.394(4) . ?
C9 C21 1.486(4) . ?
C10 C11 1.370(4) . ?
C10 H10 0.9400 . ?
C11 H11 0.9400 . ?
C12 C17 1.388(4) . ?
C12 C13 1.396(3) . ?
C13 C14 1.385(4) . ?
C13 C18 1.499(4) . ?
C14 C15 1.375(4) . ?
C14 H14 0.9400 . ?
C15 C16 1.387(4) . ?
C15 C19 1.510(4) . ?
C16 C17 1.386(4) . ?
C16 H16 0.9400 . ?
C17 C20 1.517(4) . ?
C18 H18A 0.9700 . ?
C18 H18B 0.9700 . ?
C18 H18C 0.9700 . ?
C19 H19A 0.9700 . ?
C19 H19B 0.9700 . ?
C19 H19C 0.9700 . ?
C20 H20A 0.9700 . ?
C20 H20B 0.9700 . ?
C20 H20C 0.9700 . ?
C21 C22 1.387(4) . ?
C21 C26 1.396(4) . ?
C22 C23 1.400(4) . ?
C22 H22 0.9400 . ?
C23 C24 1.399(5) . ?
C23 C27 1.505(5) . ?
C24 C25 1.374(5) . ?
C24 H24 0.9400 . ?
C25 C26 1.383(4) . ?
C25 C28 1.517(5) . ?
C26 H26 0.9400 . ?
C27 H27A 0.9700 . ?
C27 H27B 0.9700 . ?
C27 H27C 0.9700 . ?
C28 H28A 0.9700 . ?
C28 H28B 0.9700 . ?
C28 H28C 0.9700 . ?
N29 C30 1.132(3) . ?
C30 C31 1.455(4) . ?
C31 H31A 0.9700 . ?
C31 H31B 0.9700 . ?
C31 H31C 0.9700 . ?
C1L Cl1 1.731(11) . ?
C1L Cl2 1.733(10) . ?
C1L H1LA 0.9800 . ?
C1L H1LB 0.9800 . ?
C1LA Cl1A 1.731(13) . ?
C1LA Cl2A 1.737(12) . ?
C1LA H1LC 0.9800 . ?
C1LA H1LD 0.9800 . ?
P1 F3 1.550(7) . ?
P1 F2 1.555(8) . ?
P1 F5 1.557(8) . ?
P1 F4 1.559(8) . ?
P1 F1 1.568(8) . ?
P1 F6 1.574(7) . ?
P1A F2A 1.533(8) . ?
P1A F1A 1.534(9) . ?
P1A F5A 1.549(8) . ?
P1A F6A 1.550(9) . ?
P1A F3A 1.569(9) . ?
P1A F4A 1.574(8) . ?

loop_
_geom_angle_atom_site_label_1
_geom_angle_atom_site_label_2
_geom_angle_atom_site_label_3
_geom_angle
_geom_angle_site_symmetry_1
_geom_angle_site_symmetry_3
_geom_angle_publ_flag
C1 Ru1 C1 95.98(12) . 2_656 ?
C1 Ru1 N7 98.82(8) . 2_656 ?
C1 Ru1 N7 77.88(8) 2_656 2_656 ?
C1 Ru1 N7 77.88(8) . . ?
C1 Ru1 N7 98.82(8) 2_656 . ?
N7 Ru1 N7 175.15(10) 2_656 . ?
C1 Ru1 N29 89.00(9) . 2_656 ?
C1 Ru1 N29 169.64(8) 2_656 2_656 ?
N7 Ru1 N29 92.41(7) 2_656 2_656 ?
N7 Ru1 N29 91.09(7) . 2_656 ?
C1 Ru1 N29 169.65(8) . . ?
C1 Ru1 N29 89.00(9) 2_656 . ?
N7 Ru1 N29 91.09(7) 2_656 . ?
N7 Ru1 N29 92.41(7) . . ?
N29 Ru1 N29 87.58(11) 2_656 . ?
N2 C1 N5 103.16(19) . . ?
N2 C1 Ru1 141.44(18) . . ?
N5 C1 Ru1 115.11(15) . . ?
C1 N2 C3 110.9(2) . . ?
C1 N2 C12 125.3(2) . . ?
C3 N2 C12 123.7(2) . . ?
C4 C3 N2 108.5(2) . . ?
C4 C3 H3 125.8 . . ?
N2 C3 H3 125.8 . . ?
C3 C4 N5 105.7(2) . . ?
C3 C4 H4 127.1 . . ?
N5 C4 H4 127.1 . . ?
C1 N5 C6 118.56(19) . . ?
C1 N5 C4 111.7(2) . . ?
C6 N5 C4 129.7(2) . . ?
N7 C6 C11 123.2(2) . . ?
N7 C6 N5 112.57(19) . . ?
C11 C6 N5 124.2(2) . . ?
C8 N7 C6 117.08(19) . . ?
C8 N7 Ru1 127.18(15) . . ?
C6 N7 Ru1 115.74(15) . . ?
N7 C8 C9 124.0(2) . . ?
N7 C8 H8 118.0 . . ?
C9 C8 H8 118.0 . . ?
C8 C9 C10 116.7(2) . . ?
C8 C9 C21 120.8(2) . . ?
C10 C9 C21 122.5(2) . . ?
C11 C10 C9 120.5(2) . . ?
C11 C10 H10 119.8 . . ?
C9 C10 H10 119.8 . . ?
C10 C11 C6 118.5(2) . . ?
C10 C11 H11 120.7 . . ?
C6 C11 H11 120.7 . . ?
C17 C12 C13 122.2(2) . . ?
C17 C12 N2 118.8(2) . . ?
C13 C12 N2 119.0(2) . . ?
C14 C13 C12 117.5(2) . . ?
C14 C13 C18 120.6(2) . . ?
C12 C13 C18 121.9(2) . . ?
C15 C14 C13 122.5(3) . . ?
C15 C14 H14 118.8 . . ?
C13 C14 H14 118.8 . . ?
C14 C15 C16 118.1(3) . . ?
C14 C15 C19 120.5(3) . . ?
C16 C15 C19 121.5(3) . . ?
C17 C16 C15 122.3(3) . . ?
C17 C16 H16 118.9 . . ?
C15 C16 H16 118.9 . . ?
C16 C17 C12 117.5(3) . . ?
C16 C17 C20 121.2(3) . . ?
C12 C17 C20 121.3(3) . . ?
C13 C18 H18A 109.5 . . ?
C13 C18 H18B 109.5 . . ?
H18A C18 H18B 109.5 . . ?
C13 C18 H18C 109.5 . . ?
H18A C18 H18C 109.5 . . ?
H18B C18 H18C 109.5 . . ?
C15 C19 H19A 109.5 . . ?
C15 C19 H19B 109.5 . . ?
H19A C19 H19B 109.5 . . ?
C15 C19 H19C 109.5 . . ?
H19A C19 H19C 109.5 . . ?
H19B C19 H19C 109.5 . . ?
C17 C20 H20A 109.5 . . ?
C17 C20 H20B 109.5 . . ?
H20A C20 H20B 109.5 . . ?
C17 C20 H20C 109.5 . . ?
H20A C20 H20C 109.5 . . ?
H20B C20 H20C 109.5 . . ?
C22 C21 C26 118.7(3) . . ?
C22 C21 C9 121.0(2) . . ?
C26 C21 C9 120.2(3) . . ?
C21 C22 C23 121.8(3) . . ?
C21 C22 H22 119.1 . . ?
C23 C22 H22 119.1 . . ?
C24 C23 C22 116.9(3) . . ?
C24 C23 C27 122.7(3) . . ?
C22 C23 C27 120.4(3) . . ?
C25 C24 C23 122.8(3) . . ?
C25 C24 H24 118.6 . . ?
C23 C24 H24 118.6 . . ?
C24 C25 C26 118.6(3) . . ?
C24 C25 C28 121.0(3) . . ?
C26 C25 C28 120.4(4) . . ?
C25 C26 C21 121.2(3) . . ?
C25 C26 H26 119.4 . . ?
C21 C26 H26 119.4 . . ?
C23 C27 H27A 109.5 . . ?
C23 C27 H27B 109.5 . . ?
H27A C27 H27B 109.5 . . ?
C23 C27 H27C 109.5 . . ?
H27A C27 H27C 109.5 . . ?
H27B C27 H27C 109.5 . . ?
C25 C28 H28A 109.5 . . ?
C25 C28 H28B 109.5 . . ?
H28A C28 H28B 109.5 . . ?
C25 C28 H28C 109.5 . . ?
H28A C28 H28C 109.5 . . ?
H28B C28 H28C 109.5 . . ?
C30 N29 Ru1 173.7(2) . . ?
N29 C30 C31 178.5(3) . . ?
C30 C31 H31A 109.5 . . ?
C30 C31 H31B 109.5 . . ?
H31A C31 H31B 109.5 . . ?
C30 C31 H31C 109.5 . . ?
H31A C31 H31C 109.5 . . ?
H31B C31 H31C 109.5 . . ?
Cl1 C1L Cl2 113.5(7) . . ?
Cl1 C1L H1LA 108.9 . . ?
Cl2 C1L H1LA 108.9 . . ?
Cl1 C1L H1LB 108.9 . . ?
Cl2 C1L H1LB 108.9 . . ?
H1LA C1L H1LB 107.7 . . ?
Cl1A C1LA Cl2A 109.8(10) . . ?
Cl1A C1LA H1LC 109.7 . . ?
Cl2A C1LA H1LC 109.7 . . ?
Cl1A C1LA H1LD 109.7 . . ?
Cl2A C1LA H1LD 109.7 . . ?
H1LC C1LA H1LD 108.2 . . ?
F3 P1 F2 91.8(6) . . ?
F3 P1 F5 86.7(5) . . ?
F2 P1 F5 87.8(5) . . ?
F3 P1 F4 95.2(7) . . ?
F2 P1 F4 172.8(8) . . ?
F5 P1 F4 90.8(6) . . ?
F3 P1 F1 178.4(7) . . ?
F2 P1 F1 86.7(5) . . ?
F5 P1 F1 92.7(5) . . ?
F4 P1 F1 86.3(6) . . ?
F3 P1 F6 91.4(5) . . ?
F2 P1 F6 87.6(5) . . ?
F5 P1 F6 175.0(7) . . ?
F4 P1 F6 94.0(6) . . ?
F1 P1 F6 89.1(5) . . ?
F2A P1A F1A 92.1(6) . . ?
F2A P1A F5A 89.1(5) . . ?
F1A P1A F5A 89.9(6) . . ?
F2A P1A F6A 94.0(7) . . ?
F1A P1A F6A 89.3(8) . . ?
F5A P1A F6A 176.7(8) . . ?
F2A P1A F3A 89.6(6) . . ?
F1A P1A F3A 178.2(8) . . ?
F5A P1A F3A 89.6(6) . . ?
F6A P1A F3A 91.2(7) . . ?
F2A P1A F4A 178.4(6) . . ?
F1A P1A F4A 86.8(5) . . ?
F5A P1A F4A 89.7(5) . . ?
F6A P1A F4A 87.1(6) . . ?
F3A P1A F4A 91.5(6) . . ?

loop_
_geom_torsion_atom_site_label_1
_geom_torsion_atom_site_label_2
_geom_torsion_atom_site_label_3
_geom_torsion_atom_site_label_4
_geom_torsion
_geom_torsion_site_symmetry_1
_geom_torsion_site_symmetry_2
_geom_torsion_site_symmetry_3
_geom_torsion_site_symmetry_4
_geom_torsion_publ_flag
N5 C1 N2 C3 0.1(3) . . . . ?
Ru1 C1 N2 C3 172.9(2) . . . . ?
N5 C1 N2 C12 -179.2(2) . . . . ?
Ru1 C1 N2 C12 -6.3(4) . . . . ?
C1 N2 C3 C4 0.2(3) . . . . ?
C12 N2 C3 C4 179.5(2) . . . . ?
N2 C3 C4 N5 -0.4(3) . . . . ?
N2 C1 N5 C6 179.49(19) . . . . ?
Ru1 C1 N5 C6 4.4(3) . . . . ?
N2 C1 N5 C4 -0.3(3) . . . . ?
Ru1 C1 N5 C4 -175.43(17) . . . . ?
C3 C4 N5 C1 0.5(3) . . . . ?
C3 C4 N5 C6 -179.3(2) . . . . ?
C1 N5 C6 N7 -2.6(3) . . . . ?
C4 N5 C6 N7 177.2(2) . . . . ?
C1 N5 C6 C11 176.8(2) . . . . ?
C4 N5 C6 C11 -3.4(4) . . . . ?
C11 C6 N7 C8 0.6(3) . . . . ?
N5 C6 N7 C8 -179.95(19) . . . . ?
C11 C6 N7 Ru1 -179.75(18) . . . . ?
N5 C6 N7 Ru1 -0.3(2) . . . . ?
C6 N7 C8 C9 0.3(3) . . . . ?
Ru1 N7 C8 C9 -179.28(17) . . . . ?
N7 C8 C9 C10 -1.0(4) . . . . ?
N7 C8 C9 C21 178.9(2) . . . . ?
C8 C9 C10 C11 0.7(4) . . . . ?
C21 C9 C10 C11 -179.1(2) . . . . ?
C9 C10 C11 C6 0.1(4) . . . . ?
N7 C6 C11 C10 -0.8(4) . . . . ?
N5 C6 C11 C10 179.8(2) . . . . ?
C1 N2 C12 C17 97.9(3) . . . . ?
C3 N2 C12 C17 -81.3(3) . . . . ?
C1 N2 C12 C13 -83.6(3) . . . . ?
C3 N2 C12 C13 97.3(3) . . . . ?
C17 C12 C13 C14 -1.2(4) . . . . ?
N2 C12 C13 C14 -179.7(2) . . . . ?
C17 C12 C13 C18 176.9(2) . . . . ?
N2 C12 C13 C18 -1.7(4) . . . . ?
C12 C13 C14 C15 1.9(4) . . . . ?
C18 C13 C14 C15 -176.1(3) . . . . ?
C13 C14 C15 C16 -1.8(4) . . . . ?
C13 C14 C15 C19 176.9(3) . . . . ?
C14 C15 C16 C17 0.9(4) . . . . ?
C19 C15 C16 C17 -177.7(3) . . . . ?
C15 C16 C17 C12 -0.2(4) . . . . ?
C15 C16 C17 C20 179.4(3) . . . . ?
C13 C12 C17 C16 0.4(4) . . . . ?
N2 C12 C17 C16 178.9(2) . . . . ?
C13 C12 C17 C20 -179.2(3) . . . . ?
N2 C12 C17 C20 -0.7(4) . . . . ?
C8 C9 C21 C22 -28.9(4) . . . . ?
C10 C9 C21 C22 150.9(3) . . . . ?
C8 C9 C21 C26 154.2(2) . . . . ?
C10 C9 C21 C26 -26.0(4) . . . . ?
C26 C21 C22 C23 -1.5(4) . . . . ?
C9 C21 C22 C23 -178.5(3) . . . . ?
C21 C22 C23 C24 0.8(5) . . . . ?
C21 C22 C23 C27 179.3(3) . . . . ?
C22 C23 C24 C25 0.7(5) . . . . ?
C27 C23 C24 C25 -177.8(3) . . . . ?
C23 C24 C25 C26 -1.4(5) . . . . ?
C23 C24 C25 C28 177.9(3) . . . . ?
C24 C25 C26 C21 0.6(5) . . . . ?
C28 C25 C26 C21 -178.7(3) . . . . ?
C22 C21 C26 C25 0.8(4) . . . . ?
C9 C21 C26 C25 177.8(3) . . . . ?

_refine_diff_density_max         0.248
_refine_diff_density_min         -0.317
_refine_diff_density_rms         0.049

_shelx_res_file                  
; 
  
TITL z1020c_0m_a.res in C2/c 
    z1020c_0m.res 
    created by SHELXL-2016/6 at 10:02:01 on 01-Mar-2017 
REM Old TITL z1020c_0m in Cc 
REM SHELXT solution in C2/c 
REM R1 0.178,  Rweak 0.020,  Alpha 0.065,  Orientation as input 
REM Formula found by SHELXT:  C62 F4 N12 P2 Ru 
CELL  0.71073  19.8615   22.9601   13.8009   90.0000   95.504   90.0000 
ZERR    4.000   0.0009    0.0010    0.0006    0.0000    0.002    0.0000 
LATT  7 
SYMM -X, Y, 1/2-Z 
SFAC C H F N P RU Cl 
UNIT 224 240 48 32 8 4 16 
TEMP -43.140 
L.S. 10 
BOND $H 
LIST 4 
acta 
conf 
size .11 .13 .62 
l.s. 20 
FMAP 2 
PLAN 10 
omit 1 1 1 
size  .11 .13 .62 
WGHT    0.041600    7.203500 
FVAR       0.19467   0.53640   0.53134 
RU1   6    0.500000    0.204967    0.750000    10.50000    0.03175    0.03380 = 
         0.03226    0.00000   -0.00061    0.00000 
C1    1    0.440645    0.147101    0.806564    11.00000    0.03712    0.03702 = 
         0.04166    0.00325    0.00549    0.00862 
N2    4    0.436155    0.114602    0.887645    11.00000    0.04192    0.05028 = 
         0.05228    0.01723    0.01050    0.00790 
C3    1    0.373932    0.086296    0.884221    11.00000    0.04814    0.06048 = 
         0.08082    0.03188    0.01598    0.00144 
AFIX  43 
H3    2    0.359662    0.061568    0.932539    11.00000   -1.20000 
AFIX   0 
C4    1    0.338372    0.100085    0.801582    11.00000    0.03872    0.05191 = 
         0.08339    0.01992    0.01114   -0.00332 
AFIX  43 
H4    2    0.294646    0.087169    0.779610    11.00000   -1.20000 
AFIX   0 
N5    4    0.379221    0.137825    0.753650    11.00000    0.03326    0.03955 = 
         0.05180    0.00817    0.00376   -0.00092 
C6    1    0.366238    0.165745    0.664301    11.00000    0.03348    0.03816 = 
         0.04445   -0.00083    0.00352    0.00081 
N7    4    0.417089    0.201104    0.643939    11.00000    0.03441    0.03883 = 
         0.03725   -0.00157   -0.00019   -0.00083 
C8    1    0.409297    0.230173    0.558973    11.00000    0.03710    0.04716 = 
         0.03613   -0.00016    0.00058   -0.00310 
AFIX  43 
H8    2    0.444494    0.254885    0.543662    11.00000   -1.20000 
AFIX   0 
C9    1    0.352299    0.225886    0.492361    11.00000    0.04082    0.05447 = 
         0.03703   -0.00483   -0.00097    0.00532 
C10   1    0.301408    0.188232    0.516357    11.00000    0.03328    0.05960 = 
         0.04894   -0.00956   -0.00614   -0.00054 
AFIX  43 
H10   2    0.262179    0.183556    0.473249    11.00000   -1.20000 
AFIX   0 
C11   1    0.308150    0.157978    0.602340    11.00000    0.03448    0.04700 = 
         0.05760   -0.00370    0.00066   -0.00515 
AFIX  43 
H11   2    0.273975    0.132504    0.618750    11.00000   -1.20000 
AFIX   0 
C12   1    0.487676    0.109919    0.967799    11.00000    0.04893    0.05256 = 
         0.04264    0.01677    0.01087    0.00872 
C13   1    0.540365    0.070230    0.961675    11.00000    0.04866    0.04842 = 
         0.04710    0.01503    0.01163    0.00527 
C14   1    0.588970    0.066656    1.040410    11.00000    0.05120    0.05506 = 
         0.05810    0.02111    0.00620    0.00736 
AFIX  43 
H14   2    0.625588    0.041055    1.036896    11.00000   -1.20000 
AFIX   0 
C15   1    0.585686    0.099130    1.123496    11.00000    0.07268    0.06646 = 
         0.04892    0.02299    0.00326   -0.00483 
C16   1    0.532357    0.137919    1.126467    11.00000    0.09481    0.07336 = 
         0.03905    0.00749    0.01875    0.00250 
AFIX  43 
H16   2    0.529919    0.160787    1.182519    11.00000   -1.20000 
AFIX   0 
C17   1    0.482554    0.144124    1.049669    11.00000    0.07090    0.06588 = 
         0.04814    0.01625    0.02300    0.01373 
C18   1    0.543670    0.031298    0.875092    11.00000    0.06025    0.05502 = 
         0.05728    0.00678    0.00721    0.01228 
AFIX 137 
H18A  2    0.581749    0.004934    0.886723    11.00000   -1.50000 
H18B  2    0.549252    0.054785    0.817989    11.00000   -1.50000 
H18C  2    0.502149    0.008979    0.864525    11.00000   -1.50000 
AFIX   0 
C19   1    0.638022    0.091431    1.209409    11.00000    0.11410    0.09608 = 
         0.06226    0.02744   -0.02304   -0.01558 
AFIX 137 
H19A  2    0.634027    0.122894    1.255413    11.00000   -1.50000 
H19B  2    0.682873    0.091973    1.187115    11.00000   -1.50000 
H19C  2    0.630780    0.054483    1.240873    11.00000   -1.50000 
AFIX   0 
C20   1    0.424433    0.186445    1.055310    11.00000    0.11175    0.09331 = 
         0.07302    0.01041    0.03876    0.04377 
AFIX 137 
H20A  2    0.434660    0.212635    1.109890    11.00000   -1.50000 
H20B  2    0.383414    0.164966    1.064153    11.00000   -1.50000 
H20C  2    0.418051    0.208801    0.995497    11.00000   -1.50000 
AFIX   0 
C21   1    0.346920    0.260231    0.400689    11.00000    0.04123    0.06978 = 
         0.03979    0.00156   -0.00094    0.00889 
C22   1    0.379214    0.313560    0.395743    11.00000    0.05094    0.08384 = 
         0.04574    0.01058    0.00092    0.00600 
AFIX  43 
H22   2    0.405702    0.327524    0.450972    11.00000   -1.20000 
AFIX   0 
C23   1    0.373410    0.347144    0.310686    11.00000    0.06287    0.09830 = 
         0.06493    0.02558    0.01609    0.01160 
C24   1    0.332714    0.324791    0.230933    11.00000    0.06968    0.13210 = 
         0.04294    0.02447    0.01137    0.03464 
AFIX  43 
H24   2    0.328357    0.346297    0.172711    11.00000   -1.20000 
AFIX   0 
C25   1    0.298854    0.272762    0.234078    11.00000    0.06745    0.11494 = 
         0.03872    0.00004   -0.00311    0.02932 
C26   1    0.306386    0.240496    0.319078    11.00000    0.05698    0.08469 = 
         0.04261   -0.00763   -0.00722    0.01719 
AFIX  43 
H26   2    0.283806    0.204645    0.321923    11.00000   -1.20000 
AFIX   0 
C27   1    0.408508    0.405162    0.308193    11.00000    0.11134    0.11817 = 
         0.10860    0.05329    0.02974    0.00109 
AFIX 137 
H27A  2    0.406196    0.419085    0.241597    11.00000   -1.50000 
H27B  2    0.455485    0.400875    0.333667    11.00000   -1.50000 
H27C  2    0.386458    0.432911    0.347706    11.00000   -1.50000 
AFIX   0 
C28   1    0.253359    0.251209    0.146889    11.00000    0.10595    0.16491 = 
         0.04652   -0.01208   -0.02360    0.03798 
AFIX 137 
H28A  2    0.256898    0.209176    0.142459    11.00000   -1.50000 
H28B  2    0.267194    0.268796    0.088043    11.00000   -1.50000 
H28C  2    0.206890    0.261874    0.154406    11.00000   -1.50000 
AFIX   0 
N29   4    0.546717    0.270936    0.675266    11.00000    0.03947    0.04526 = 
         0.04640    0.00017   -0.00334   -0.00663 
C30   1    0.566526    0.306899    0.629586    11.00000    0.05474    0.05606 = 
         0.06400    0.00611   -0.00123   -0.01741 
C31   1    0.590759    0.352613    0.568758    11.00000    0.11734    0.09920 = 
         0.11963    0.04196    0.01295   -0.04963 
AFIX 137 
H31A  2    0.639742    0.351203    0.572221    11.00000   -1.50000 
H31B  2    0.576651    0.390237    0.591582    11.00000   -1.50000 
H31C  2    0.572046    0.346886    0.501905    11.00000   -1.50000 
AFIX   0 
rigu c1L c1La cl1 cl2 cl1a cl2a 
simu c1L c1La 
simu cl1 cl2 cl1a cl2a 
sadi c1l cl1 c1l cl2 c1la cl1a c1la cl2a 
sadi cl1 cl2 cl1a cl2a 
same c1la > cl2a 
part 1 31 
C1L   1    0.611458    0.554054    0.335151    31.00000    0.13590    0.09799 = 
         0.08679   -0.02458   -0.01261    0.04448 
AFIX  23 
H1LA  2    0.609257    0.541939    0.266830    31.00000   -1.20000 
H1LB  2    0.651447    0.535770    0.369577    31.00000   -1.20000 
AFIX   0 
  
CL1   7    0.540037    0.529038    0.384683    31.00000    0.16076    0.18249 = 
         0.12302   -0.00941    0.00003    0.01710 
CL2   7    0.620897    0.629059    0.341234    31.00000    0.25689    0.08708 = 
         0.08672    0.00069   -0.01393    0.06619 
part 2 -31 
C1LA  1    0.629287    0.562515    0.354511   -31.00000    0.16882    0.13483 = 
         0.12857    0.01319   -0.02318    0.05575 
AFIX  23 
H1LC  2    0.642922    0.541365    0.297890   -31.00000   -1.20000 
H1LD  2    0.654587    0.546550    0.412988   -31.00000   -1.20000 
AFIX   0 
CL1A  7    0.543400    0.553521    0.361908   -31.00000    0.13986    0.25322 = 
         0.49078   -0.00888   -0.07646    0.01273 
CL2A  7    0.647808    0.636041    0.343863   -31.00000    0.14564    0.12987 = 
         0.11551   -0.03557   -0.05726    0.03877 
part 0 
  
rigu p1 f1 > f6a 
same p1a f1a > f6a 
part 1 21 
P1    5    0.732083    0.471153    0.571772    21.00000    0.06530    0.08693 = 
         0.07690    0.01376   -0.01171   -0.02828 
  
F1    3    0.746679    0.510157    0.664657    21.00000    0.13600    0.13171 = 
         0.16961   -0.07353   -0.02323   -0.00770 
F2    3    0.725285    0.419371    0.642802    21.00000    0.08331    0.12071 = 
         0.12934    0.05854   -0.02823   -0.03595 
F3    3    0.716722    0.431285    0.481721    21.00000    0.11563    0.27758 = 
         0.09044   -0.09667   -0.00220   -0.04832 
F5    3    0.654204    0.479791    0.569762    21.00000    0.06213    0.11865 = 
         0.21471   -0.01714   -0.01454    0.01116 
F4    3    0.738379    0.528153    0.511941    21.00000    0.18920    0.20409 = 
         0.24348    0.15785   -0.09920   -0.12405 
F6    3    0.809799    0.456746    0.576326    21.00000    0.05802    0.18883 = 
         0.05184   -0.01049    0.00983    0.00088 
part 2 -21 
P1A   5    0.730077    0.469390    0.552043   -21.00000    0.04579    0.07812 = 
         0.08971    0.02461    0.01518   -0.00780 
F1A   3    0.718091    0.534885    0.563924   -21.00000    0.24146    0.06565 = 
         0.18807   -0.04075    0.11950   -0.06104 
F2A   3    0.708408    0.456176    0.653437   -21.00000    0.15001    0.18263 = 
         0.08156    0.04153    0.04965   -0.01122 
F3A   3    0.742288    0.402679    0.536386   -21.00000    0.14543    0.08601 = 
         0.24322    0.06296    0.07710    0.04619 
F5A   3    0.655598    0.461851    0.509178   -21.00000    0.07263    0.10502 = 
         0.16506    0.06361   -0.01510   -0.03144 
F4A   3    0.750544    0.484146    0.447398   -21.00000    0.07070    0.12604 = 
         0.09787    0.04684    0.03253    0.02068 
F6A   3    0.805488    0.478490    0.589332   -21.00000    0.09495    0.31772 = 
         0.20183    0.12869   -0.04440   -0.11723 
part 0 
HKLF 4 
  
  
  
  
REM  z1020c_0m_a.res in C2/c 
REM R1 =  0.0349 for    4994 Fo > 4sig(Fo)  and  0.0432 for all    5694 data 
REM    473 parameters refined using    191 restraints 
  
END 
  
WGHT      0.0416      7.2035 
  
REM Highest difference peak  0.248,  deepest hole -0.317,  1-sigma level  0.049 
Q1    1   0.7893  0.4884  0.5171  11.00000  0.05    0.25 
Q2    1   0.7271  0.4005  0.5040  11.00000  0.05    0.24 
Q3    1   0.6910  0.4411  0.4911  11.00000  0.05    0.22 
Q4    1   0.5391 -0.0139  0.8867  11.00000  0.05    0.22 
Q5    1   0.7341  0.4594  0.4727  11.00000  0.05    0.21 
Q6    1   0.8192  0.5167  0.6252  11.00000  0.05    0.20 
Q7    1   0.3652  0.0776  0.9751  11.00000  0.05    0.19 
Q8    1   0.5624  0.5510  0.2809  11.00000  0.05    0.19 
Q9    1   0.3599  0.1112  0.7620  11.00000  0.05    0.19 
Q10   1   0.7729  0.4221  0.5797  11.00000  0.05    0.19 
;
_shelx_res_checksum              18750

_shelx_hkl_file                  
; 
  -4   0   0 24.9298 2.11814   2 
  -4   0   0 30.0035 1.82974   3 
  -4   0   0 29.5975 1.12665   4 
   4   0   0 23.8120 2.04719   2 
   4   0   0 28.1395 1.81054   3 
   4   0   0 27.1547 1.05713   4 
   6   0   0 130.812 3.49810   4 
   6   0   0 132.253 4.58275   3 
   6   0   0 125.509 4.91294   2 
  -6   0   0 132.447 5.00614   2 
  -6   0   0 125.146 4.49915   3 
  -6   0   0 137.253 3.54252   4 
   8   0   0 631.208 16.1000   3 
   8   0   0 620.731 14.5504   4 
  -8   0   0 625.138 14.5322   4 
  -8   0   0 618.172 16.6825   2 
  -8   0   0 640.672 15.9430   3 
   8   0   0 637.175 16.5517   2 
 -10   0   0 11.7431 2.39537   3 
 -10   0   0 16.7664 1.67738   4 
 -10   0   0 12.8585 2.85424   2 
  10   0   0 14.5874 1.58442   4 
  10   0   0 12.9139 2.77978   2 
  10   0   0 10.8225 2.31580   3 
 -12   0   0 93.6251 5.45550   3 
  12   0   0 80.2732 6.05195   2 
 -12   0   0 78.5012 6.08157   2 
 -12   0   0 92.7239 3.54192   4 
  12   0   0 90.3825 5.44152   3 
 -14   0   0 395.931 14.1542   2 
  14   0   0 367.236 13.5070   2 
  14   0   0 372.821 12.7942   3 
 -14   0   0 369.042 12.3667   3 
 -14   0   0 394.796 10.2242   4 
  16   0   0 205.185 10.9927   2 
 -16   0   0 197.253 9.58994   3 
 -16   0   0 192.506 10.7743   2 
  16   0   0 193.064 9.45417   3 
 -16   0   0 201.515 6.86090   4 
  18   0   0 21.3036 4.95143   3 
 -18   0   0 20.2522 4.70637   3 
 -18   0   0 21.3675 9.83840   2 
 -18   0   0 19.6434 2.96758   4 
  18   0   0 23.9929 6.32674   2 
  20   0   0 105.519 10.2120   3 
 -20   0   0 98.7262 10.4709   3 
  20   0   0 82.1551 9.98079   2 
 -20   0   0 92.6466 9.97991   2 
 -20   0   0 105.424 6.96628   4 
 -22   0   0 104.717 12.1695   2 
  22   0   0 99.4464 10.7154   3 
   3  -1   0 1602.23 35.1365   2 
  -3  -1   0 1546.62 35.5178   2 
  -3  -1   0 1523.75 34.4597   4 
   3   1   0 1547.14 35.0885   3 
   3   1   0 1581.25 35.3204   2 
  -3   1   0 1630.39 35.0193   3 
  -5  -1   0 1.25767 0.50712   4 
   5  -1   0 0.21703 0.37432   4 
   5  -1   0 1.55634 1.10769   2 
  -5  -1   0 0.91945 1.25637   2 
   5  -1   0 -0.4379 0.85866   3 
  -5  -1   0 -0.6406 0.87270   3 
   5   1   0 0.60441 1.24824   2 
  -5   1   0 2.80321 0.47267   4 
  -5   1   0 0.86544 1.17919   2 
   5   1   0 1.02904 0.88886   3 
  -5   1   0 0.20288 0.94246   3 
   7  -1   0 304.470 8.69695   3 
  -7  -1   0 304.332 9.33383   2 
   7  -1   0 307.878 7.32054   4 
  -7  -1   0 305.362 7.46350   4 
  -7  -1   0 308.816 8.60549   3 
   7  -1   0 298.484 8.97640   2 
  -7   1   0 305.223 8.58123   3 
   7   1   0 299.150 8.60264   3 
   7   1   0 298.413 7.41577   4 
  -7   1   0 304.619 9.07985   2 
  -7   1   0 301.267 7.27031   4 
  -9  -1   0 128.145 6.15940   2 
   9  -1   0 123.602 5.83401   2 
   9  -1   0 122.410 5.31525   3 
  -9  -1   0 131.090 5.33136   3 
   9  -1   0 129.240 3.81428   4 
  -9  -1   0 125.214 3.93852   4 
   9   1   0 121.607 5.27962   3 
  -9   1   0 128.752 5.30265   3 
  -9   1   0 121.977 5.87459   2 
  -9   1   0 129.652 3.77130   4 
   9   1   0 132.782 6.04958   2 
   9   1   0 130.308 3.94139   4 
 -11  -1   0 821.885 18.8224   4 
  11  -1   0 794.673 20.8665   3 
 -11  -1   0 795.937 21.8852   2 
  11  -1   0 791.261 21.3406   2 
 -11  -1   0 794.419 20.5368   3 
 -11   1   0 816.958 20.6341   3 
  11   1   0 803.890 21.5136   2 
 -11   1   0 794.259 18.5873   4 
 -11   1   0 795.738 21.6738   2 
  11   1   0 805.346 20.8545   3 
  11   1   0 790.017 18.8241   4 
 -13  -1   0 150.215 5.09110   4 
 -13  -1   0 144.589 7.30813   3 
  13  -1   0 144.619 7.98059   2 
 -13  -1   0 152.846 8.31975   2 
  13  -1   0 156.764 7.26342   3 
  13   1   0 141.543 7.88847   2 
 -13   1   0 151.797 8.22263   2 
  13   1   0 150.080 7.19983   3 
 -13   1   0 152.775 4.97695   4 
  15  -1   0 393.953 13.5803   3 
 -15  -1   0 385.489 10.6804   4 
 -15  -1   0 394.121 13.1155   3 
 -15  -1   0 392.364 14.6812   2 
  15  -1   0 392.036 14.3396   2 
 -15   1   0 389.993 14.6505   2 
 -15   1   0 376.414 10.4988   4 
  15   1   0 377.307 13.2901   3 
 -15   1   0 381.640 13.0344   3 
  15   1   0 404.126 14.4283   2 
  17  -1   0 -3.0189 3.68823   3 
 -17  -1   0 -4.2709 4.57258   2 
 -17  -1   0 3.51820 2.13743   4 
 -17  -1   0 -2.8339 3.86692   3 
  17  -1   0 -3.3223 4.63967   2 
 -17   1   0 0.10046 1.85846   4 
  17   1   0 3.92529 3.64472   3 
 -17   1   0 3.57206 3.97799   3 
 -17   1   0 5.65192 4.80714   2 
  17   1   0 -11.980 4.14254   2 
  19  -1   0 3.96198 4.95245   3 
 -19  -1   0 6.70852 5.13624   3 
 -19  -1   0 5.84188 6.04167   2 
 -19  -1   0 4.45447 2.92586   4 
  19  -1   0 -2.7447 5.81336   2 
  19   1   0 2.14809 6.20605   2 
 -19   1   0 4.53105 5.13723   3 
 -19   1   0 -0.3141 5.49010   2 
 -19   1   0 6.08363 2.87947   4 
  19   1   0 9.20368 4.85859   3 
 -21  -1   0 9.90292 4.12043   4 
 -21  -1   0 0.23855 7.82082   2 
  21  -1   0 11.3941 6.35561   3 
 -21  -1   0 6.32801 5.83988   3 
  21  -1   0 -1.9039 7.66330   2 
 -21   1   0 3.25596 7.39315   2 
  21   1   0 -10.861 7.16732   2 
 -21   1   0 6.46289 6.20249   3 
  21   1   0 0.73679 5.62028   3 
 -21   1   0 4.67867 4.10009   4 
  23  -1   0 35.1361 8.99578   3 
 -23  -1   0 20.7496 9.87509   2 
  23   1   0 12.4563 7.69670   3 
 -23   1   0 18.5456 9.98473   2 
  -2  -2   0 2393.02 53.4355   2 
  -2  -2   0 2435.75 53.1369   3 
  -2   2   0 2417.23 53.1797   3 
   2   2   0 2418.78 53.4707   2 
   4  -2   0 602.693 14.4670   2 
  -4  -2   0 628.426 14.9508   2 
   4  -2   0 616.639 14.4489   3 
  -4  -2   0 582.836 13.6616   4 
  -4  -2   0 608.822 14.3242   3 
  -4   2   0 595.391 14.3363   3 
   4   2   0 621.003 14.9007   2 
   4   2   0 611.231 14.3404   3 
  -4   2   0 600.574 14.4912   2 
  -4   2   0 577.931 13.2845   4 
   4   2   0 584.062 13.6305   4 
   6  -2   0 1188.67 27.0425   3 
  -6  -2   0 1175.81 26.8866   3 
  -6  -2   0 1108.99 25.8700   4 
   6  -2   0 1189.93 27.2465   2 
  -6  -2   0 1148.16 27.6170   2 
   6   2   0 1166.49 27.5475   2 
  -6   2   0 1153.94 27.2060   2 
  -6   2   0 1179.15 26.8982   3 
   6   2   0 1159.14 26.9199   3 
   6   2   0 1119.35 25.8472   4 
  -6   2   0 1128.17 25.5065   4 
   8  -2   0 -1.2985 1.25135   3 
  -8  -2   0 0.62399 1.42839   3 
  -8  -2   0 0.17855 0.65968   4 
   8  -2   0 0.58627 1.52710   2 
  -8  -2   0 2.91357 1.67420   2 
  -8   2   0 0.80340 1.32416   3 
   8   2   0 0.69187 1.26764   3 
  -8   2   0 1.50779 0.61369   4 
  -8   2   0 -0.1337 1.43314   2 
   8   2   0 -0.0256 1.75270   2 
   8   2   0 0.14480 0.65595   4 
  10  -2   0 1000.45 24.2908   3 
 -10  -2   0 979.081 22.3432   4 
 -10  -2   0 963.897 25.1116   2 
  10  -2   0 966.881 24.5389   2 
 -10  -2   0 968.691 23.8917   3 
 -10   2   0 957.494 24.6337   2 
  10   2   0 945.736 22.3109   4 
 -10   2   0 962.997 21.9287   4 
  10   2   0 971.943 24.9229   2 
  10   2   0 944.726 24.0171   3 
 -10   2   0 963.452 23.8317   3 
  12  -2   0 276.300 9.86154   3 
 -12  -2   0 273.902 9.54704   3 
 -12  -2   0 282.909 7.83772   4 
  12  -2   0 295.319 10.5758   2 
 -12  -2   0 280.145 10.9009   2 
 -12   2   0 285.348 10.6592   2 
  12   2   0 275.206 10.7690   2 
  12   2   0 275.637 7.81915   4 
  12   2   0 283.123 9.84001   3 
 -12   2   0 284.469 7.48247   4 
 -12   2   0 284.317 9.69290   3 
  14  -2   0 389.153 13.1955   3 
  14  -2   0 402.069 14.0987   2 
 -14  -2   0 390.077 10.6975   4 
 -14  -2   0 401.726 14.5132   2 
 -14  -2   0 390.301 12.8873   3 
 -14   2   0 408.629 14.3832   2 
 -14   2   0 408.784 12.9330   3 
  14   2   0 379.466 13.9035   2 
 -14   2   0 395.189 10.3433   4 
  14   2   0 396.264 13.1750   3 
  16  -2   0 254.738 12.1138   2 
 -16  -2   0 265.325 10.7584   3 
 -16  -2   0 250.244 12.2896   2 
  16  -2   0 242.414 10.7791   3 
 -16  -2   0 247.487 8.17143   4 
  16   2   0 240.769 10.6444   3 
 -16   2   0 265.313 12.0837   2 
 -16   2   0 260.586 10.7037   3 
  16   2   0 246.058 11.9920   2 
 -16   2   0 250.826 7.69392   4 
 -18  -2   0 15.8256 7.37132   2 
  18  -2   0 11.2875 4.72174   3 
 -18  -2   0 16.4477 2.95797   4 
 -18  -2   0 15.9712 4.95563   3 
  18  -2   0 19.0342 6.02310   2 
 -18   2   0 11.8693 2.58511   4 
  18   2   0 14.1389 5.80628   2 
 -18   2   0 10.8791 4.50444   3 
 -18   2   0 15.2614 6.32736   2 
  18   2   0 8.38741 7.03831   3 
  20  -2   0 144.962 14.0562   2 
 -20  -2   0 134.076 11.2324   3 
 -20  -2   0 117.127 13.2832   2 
  20  -2   0 154.293 11.7849   3 
 -20  -2   0 128.599 7.66360   4 
 -20   2   0 121.671 11.1130   3 
 -20   2   0 123.483 12.6300   2 
  20   2   0 131.501 13.4064   2 
 -20   2   0 126.895 7.19935   4 
  20   2   0 140.454 11.1135   3 
 -22  -2   0 -0.0609 8.24444   2 
  22  -2   0 26.8293 7.68660   3 
 -22   2   0 2.20150 7.86141   2 
  22   2   0 20.9496 7.39229   3 
  -1  -3   0 3420.83 75.1256   2 
  -3  -3   0 935.588 21.2031   2 
  -3  -3   0 853.367 20.0382   4 
  -3  -3   0 890.762 20.6072   3 
  -3   3   0 934.522 20.7382   3 
   3   3   0 918.283 21.1646   2 
   3   3   0 855.567 20.5560   3 
  -5  -3   0 2307.91 50.2867   3 
   5  -3   0 2192.64 50.3729   3 
  -5  -3   0 2338.68 51.1830   2 
  -5   3   0 2223.46 50.2815   3 
   5   3   0 2182.17 50.2386   3 
   5   3   0 2289.26 51.0027   2 
  -5   3   0 2306.44 50.4846   2 
   5   3   0 2111.15 49.3563   4 
  -7  -3   0 2.43176 1.29833   3 
  -7  -3   0 0.48187 0.67599   4 
   7  -3   0 -0.9250 1.18245   3 
   7  -3   0 2.18272 1.57461   2 
  -7  -3   0 -0.6287 1.49574   2 
  -7   3   0 4.25152 0.58666   4 
  -7   3   0 2.57782 1.39385   2 
   7   3   0 0.91472 1.42180   2 
  -7   3   0 3.43135 1.46242   3 
   7   3   0 1.14280 1.23502   3 
   7   3   0 1.73444 0.58000   4 
   9  -3   0 680.456 17.7743   2 
  -9  -3   0 677.785 17.2539   3 
   9  -3   0 681.266 17.5413   3 
  -9  -3   0 679.977 15.8896   4 
  -9  -3   0 660.829 18.3677   2 
  -9   3   0 672.864 15.2744   4 
  -9   3   0 671.038 17.2048   3 
   9   3   0 648.111 15.7578   4 
   9   3   0 640.548 17.2001   3 
   9   3   0 670.196 18.0939   2 
  -9   3   0 677.461 17.8521   2 
 -11  -3   0 11.0690 2.47014   3 
 -11  -3   0 12.5538 1.60058   4 
 -11  -3   0 8.76235 2.89710   2 
  11  -3   0 7.56205 2.23314   3 
  11  -3   0 10.1782 2.95961   2 
 -11   3   0 15.6290 3.10858   2 
  11   3   0 13.7045 2.67496   3 
  11   3   0 12.7697 3.00510   2 
 -11   3   0 12.3654 1.30612   4 
  11   3   0 11.7985 1.54671   4 
 -11   3   0 13.3420 2.58033   3 
 -13  -3   0 514.629 14.9320   4 
  13  -3   0 589.919 16.7972   3 
  13  -3   0 572.826 17.3580   2 
 -13  -3   0 557.652 17.7351   2 
 -13  -3   0 577.373 16.3329   3 
  13   3   0 551.407 17.4490   2 
  13   3   0 574.245 14.3477   4 
  13   3   0 576.531 16.5434   3 
 -13   3   0 570.784 17.3855   2 
 -13   3   0 576.052 13.7349   4 
 -15  -3   0 95.4498 6.86048   3 
 -15  -3   0 86.1500 8.09614   2 
  15  -3   0 89.1265 7.89756   2 
 -15  -3   0 96.8231 4.71173   4 
  15  -3   0 92.2519 7.14118   3 
 -15   3   0 93.8541 6.96585   3 
 -15   3   0 93.0069 4.04174   4 
  15   3   0 80.0208 7.95936   2 
  15   3   0 90.1973 6.62233   3 
 -15   3   0 71.9585 7.48606   2 
 -17  -3   0 71.5592 7.53048   3 
  17  -3   0 66.0654 7.39448   2 
 -17  -3   0 75.5155 5.00511   4 
  17  -3   0 73.6019 7.69277   3 
 -17  -3   0 82.8781 8.91500   2 
  17   3   0 58.5711 6.96823   2 
 -17   3   0 60.8870 6.16050   3 
 -17   3   0 100.418 9.17436   2 
  17   3   0 72.1639 7.39683   3 
 -17   3   0 72.9991 4.39390   4 
 -19  -3   0 13.1044 6.83707   2 
  19  -3   0 3.99258 4.93573   3 
 -19  -3   0 13.6501 5.31444   3 
 -19  -3   0 10.4268 3.15099   4 
  19   3   0 9.57528 6.59891   2 
 -19   3   0 10.4264 6.20566   2 
 -19   3   0 11.3347 5.32492   3 
  19   3   0 8.87559 4.98506   3 
 -19   3   0 11.3681 2.99134   4 
  21  -3   0 51.4211 8.20996   3 
 -21  -3   0 50.3354 7.57498   3 
 -21  -3   0 56.3151 10.1188   2 
 -21  -3   0 59.8471 7.16907   4 
 -21   3   0 66.6293 8.04573   3 
  21   3   0 60.0507 8.00440   3 
 -21   3   0 68.3607 10.0086   2 
 -23  -3   0 12.7493 10.1609   2 
  23  -3   0 5.95626 7.59384   3 
 -23   3   0 7.24733 9.13731   2 
  23   3   0 15.9972 7.66462   3 
   0  -4   0 28.7215 1.69500   3 
   0  -4   0 28.9172 1.92488   2 
   0   4   0 26.7776 1.80597   2 
   0   4   0 28.5210 1.06373   4 
   0   4   0 28.3919 1.97024   3 
  -2  -4   0 2305.23 51.1458   3 
  -2  -4   0 2282.77 51.4988   2 
  -2   4   0 2290.61 51.0967   3 
   2   4   0 2326.34 51.5165   2 
   2   4   0 2321.59 51.1141   3 
  -2   4   0 2301.39 51.1099   2 
  -4  -4   0 4816.14 107.136   2 
  -4  -4   0 4735.58 106.444   3 
  -4   4   0 4963.53 106.634   3 
   4   4   0 4871.86 107.164   2 
   4   4   0 4827.26 106.460   3 
  -6  -4   0 5.24832 1.46699   3 
  -6  -4   0 4.35122 1.78376   2 
   6  -4   0 4.77170 1.44045   3 
  -6  -4   0 3.19784 0.78984   4 
  -6   4   0 4.85891 1.51124   2 
   6   4   0 3.42720 0.77172   4 
  -6   4   0 4.49113 1.56999   3 
   6   4   0 4.61335 1.85917   2 
  -6   4   0 5.01369 0.46002   4 
   6   4   0 5.47124 1.26793   3 
  -8  -4   0 16.5587 1.78285   4 
   8  -4   0 20.9047 2.45176   3 
  -8  -4   0 18.8204 2.31430   3 
  -8  -4   0 19.1706 2.74450   2 
   8   4   0 27.3609 3.34696   2 
   8   4   0 22.2592 1.68131   4 
   8   4   0 24.4917 2.70414   3 
  -8   4   0 21.4367 1.14313   4 
  -8   4   0 21.2910 2.73184   2 
  -8   4   0 20.6294 2.37256   3 
 -10  -4   0 17.9557 2.70444   3 
 -10  -4   0 13.7318 1.66600   4 
  10  -4   0 13.7156 2.65848   3 
 -10  -4   0 11.6464 2.88958   2 
 -10   4   0 9.87193 2.37901   3 
 -10   4   0 11.5490 1.31133   4 
  10   4   0 10.9387 2.75329   2 
 -10   4   0 8.71484 2.58263   2 
  10   4   0 11.2886 1.32493   4 
  10   4   0 7.95086 2.05985   3 
 -12  -4   0 133.659 4.91895   4 
  12  -4   0 132.800 6.79694   3 
 -12  -4   0 145.868 8.03261   2 
 -12   4   0 142.159 6.69963   3 
  12   4   0 108.546 11.3477   2 
  12   4   0 140.205 4.89277   4 
 -12   4   0 144.559 7.24917   2 
  12   4   0 129.487 6.49359   3 
 -14  -4   0 3.09988 3.02468   3 
  14  -4   0 7.56783 3.10924   3 
 -14  -4   0 3.99688 1.72373   4 
 -14  -4   0 2.63032 3.87591   2 
 -14   4   0 3.04765 1.37246   4 
 -14   4   0 3.89156 3.54159   2 
  14   4   0 2.63319 2.76611   3 
  14   4   0 3.78646 3.83005   2 
  14   4   0 2.29385 1.74257   4 
 -14   4   0 5.90254 3.21012   3 
  16  -4   0 9.68972 3.97067   3 
 -16  -4   0 8.92910 3.99966   3 
 -16  -4   0 10.5747 5.30154   2 
 -16  -4   0 14.3783 2.64128   4 
  16   4   0 19.0215 5.53340   2 
 -16   4   0 14.2394 2.11167   4 
 -16   4   0 9.06419 3.97782   3 
  16   4   0 9.83838 3.80316   3 
 -16   4   0 12.9824 4.52091   2 
 -18  -4   0 2.71879 2.51190   4 
 -18  -4   0 -3.7037 6.01165   2 
  18  -4   0 1.90022 4.25302   3 
 -18  -4   0 7.30875 4.36566   3 
 -18   4   0 2.59446 2.37164   4 
 -18   4   0 -2.3212 4.10070   3 
  18   4   0 -2.0927 3.87590   3 
 -18   4   0 2.66309 5.01286   2 
  18   4   0 3.39011 5.44861   2 
  20  -4   0 101.763 10.9925   3 
 -20  -4   0 75.8855 8.44768   3 
 -20  -4   0 109.597 7.54671   4 
 -20  -4   0 100.802 11.2447   2 
 -20   4   0 107.055 12.2949   2 
 -20   4   0 93.5444 10.4814   3 
  20   4   0 137.420 11.0662   3 
 -20   4   0 98.3668 6.50866   4 
  20   4   0 114.819 13.6988   2 
 -22  -4   0 45.1204 10.5566   2 
  22  -4   0 36.7810 8.05311   3 
 -22   4   0 45.7263 10.0188   2 
  22   4   0 37.6806 8.30822   3 
  -1  -5   0 2.55660 0.98507   3 
   1  -5   0 2.55204 0.47051   4 
  -1  -5   0 -0.0045 1.05867   2 
   1  -5   0 0.80550 1.01957   2 
   1  -5   0 2.33884 0.92499   3 
   1   5   0 2.09550 0.95276   3 
  -1   5   0 0.66672 0.95379   2 
  -1   5   0 1.27855 0.90287   3 
   1   5   0 3.59040 1.21777   2 
  -3  -5   0 645.897 15.6621   2 
  -3   5   0 632.287 15.0454   3 
   3   5   0 585.622 14.1902   4 
  -3   5   0 636.637 15.0758   2 
   3   5   0 619.828 14.9733   3 
  -3   5   0 606.744 13.6042   4 
   3   5   0 625.371 15.5201   2 
  -5  -5   0 286.580 8.77558   2 
  -5  -5   0 279.790 7.17859   4 
  -5  -5   0 283.382 8.04577   3 
   5   5   0 293.536 8.83435   2 
   5   5   0 290.564 8.07438   3 
  -5   5   0 280.318 8.13931   3 
   5   5   0 270.561 7.06836   4 
  -7  -5   0 39.2744 3.68967   2 
  -7  -5   0 35.5279 2.07962   4 
  -7  -5   0 30.6283 2.84102   3 
   7   5   0 34.1184 1.91381   4 
   7   5   0 28.9121 3.19474   2 
  -7   5   0 36.1745 1.18033   4 
   7   5   0 32.1459 2.74543   3 
  -7   5   0 41.2988 3.19171   2 
  -7   5   0 29.6164 2.99623   3 
  -9  -5   0 839.395 19.6245   4 
  -9  -5   0 828.949 22.3675   2 
  -9  -5   0 845.022 21.0106   3 
   9  -5   0 824.908 21.2725   3 
  -9   5   0 832.563 21.3686   2 
   9   5   0 826.122 21.0527   3 
  -9   5   0 847.897 21.0720   3 
   9   5   0 826.952 22.0521   2 
   9   5   0 805.869 19.4736   4 
  -9   5   0 849.038 18.6461   4 
 -11  -5   0 1022.01 27.2163   2 
  11  -5   0 1012.06 25.9097   3 
 -11  -5   0 1025.16 23.8344   4 
 -11  -5   0 1020.89 25.5157   3 
 -11   5   0 1000.30 25.4240   3 
  11   5   0 1002.92 25.6155   3 
 -11   5   0 1022.30 22.8638   4 
  11   5   0 1017.32 23.7943   4 
 -11   5   0 990.701 26.1343   2 
  11   5   0 1014.43 26.6732   2 
  13  -5   0 133.345 7.29543   3 
 -13  -5   0 132.260 7.00312   3 
 -13  -5   0 122.285 8.44709   2 
  13   5   0 138.585 5.18700   4 
 -13   5   0 131.168 7.69766   2 
 -13   5   0 146.955 4.43934   4 
  13   5   0 134.181 7.06683   3 
  13   5   0 137.857 8.35305   2 
 -13   5   0 118.472 7.96132   3 
 -15  -5   0 321.422 9.53655   4 
  15  -5   0 297.949 11.9173   3 
 -15  -5   0 299.271 13.5528   2 
 -15  -5   0 310.044 11.6837   3 
 -15   5   0 306.180 12.6650   2 
 -15   5   0 308.764 11.6491   3 
  15   5   0 307.394 13.1611   2 
 -15   5   0 300.423 8.48055   4 
  15   5   0 324.456 11.8737   3 
 -17  -5   0 3.60753 4.13061   3 
  17  -5   0 -0.7656 3.86002   3 
 -17  -5   0 2.90945 2.53699   4 
 -17  -5   0 1.61212 5.36140   2 
 -17   5   0 9.01093 4.22032   3 
  17   5   0 1.66142 5.09050   2 
 -17   5   0 -1.2649 4.62921   2 
  17   5   0 -1.2964 3.46950   3 
 -17   5   0 2.87623 2.10354   4 
  19  -5   0 60.2627 7.53632   3 
 -19  -5   0 49.5060 8.61281   2 
 -19  -5   0 56.9981 7.22348   3 
 -19  -5   0 52.6570 5.84901   4 
 -19   5   0 47.7290 6.81136   3 
  19   5   0 60.5633 7.42419   3 
 -19   5   0 47.0908 7.55591   2 
 -19   5   0 63.7475 5.44853   4 
  19   5   0 52.7596 8.59597   2 
 -21  -5   0 171.809 15.9016   2 
  21  -5   0 133.612 13.4536   3 
 -21  -5   0 138.122 9.14161   4 
  21   5   0 141.949 12.2838   3 
 -21   5   0 128.079 12.1547   3 
 -21   5   0 122.869 14.5574   2 
 -23  -5   0 40.5189 11.1153   2 
  23  -5   0 63.0067 10.4860   3 
  23   5   0 48.4116 9.07763   3 
 -23   5   0 49.7905 11.1264   2 
   0  -6   0 2.57437 0.49364   4 
   0  -6   0 3.17056 1.18159   3 
   0  -6   0 2.47958 1.19651   2 
   0   6   0 3.81939 0.55446   4 
   0   6   0 3.84865 1.06593   3 
   0   6   0 5.11248 1.34331   2 
   2  -6   0 0.36505 1.07035   2 
  -2  -6   0 1.09066 1.23227   2 
  -2  -6   0 1.44504 1.07857   3 
  -2  -6   0 0.54945 0.59715   4 
   2  -6   0 0.57328 1.03364   3 
   2   6   0 -0.3052 1.26079   2 
  -2   6   0 1.86405 1.01239   3 
   2   6   0 1.41891 0.96488   3 
  -2   6   0 1.27143 1.12457   2 
   2   6   0 1.84581 0.59365   4 
  -4  -6   0 70.8533 3.93207   2 
  -4  -6   0 65.7259 3.29240   3 
  -4  -6   0 69.1262 2.53098   4 
   4   6   0 68.7990 2.44624   4 
   4   6   0 60.5486 3.74819   2 
  -4   6   0 67.0809 3.45370   2 
  -4   6   0 72.5008 3.33594   3 
  -6  -6   0 67.0460 3.61968   3 
  -6  -6   0 62.8679 4.24482   2 
  -6   6   0 70.2402 3.61703   2 
   6   6   0 60.1667 4.32078   2 
  -6   6   0 75.0457 3.84356   3 
   6   6   0 63.6020 3.47095   3 
   6   6   0 61.8170 2.56096   4 
  -8  -6   0 103.048 4.83782   3 
  -8  -6   0 102.375 5.81942   2 
  -8   6   0 89.8891 4.80297   2 
   8   6   0 101.003 3.54666   4 
   8   6   0 92.9541 4.62747   3 
   8   6   0 93.2095 5.69558   2 
  -8   6   0 97.4378 4.85349   3 
 -10  -6   0 -0.3988 1.23564   4 
 -10  -6   0 1.72639 2.58610   2 
 -10  -6   0 0.60540 1.93325   3 
  10  -6   0 0.06047 1.90427   3 
 -10   6   0 1.82158 0.77015   4 
 -10   6   0 -0.1862 1.97056   2 
 -10   6   0 -1.9411 2.02958   3 
  10   6   0 1.94437 1.78684   3 
  10   6   0 2.41600 1.18491   4 
  10   6   0 2.79159 2.51422   2 
 -12  -6   0 5.32174 3.43686   2 
 -12  -6   0 1.96072 2.44753   3 
 -12  -6   0 1.55827 1.40540   4 
  12  -6   0 0.52028 2.42278   3 
 -12   6   0 3.81220 2.56193   3 
  12   6   0 -0.5183 1.16831   4 
 -12   6   0 1.03037 1.25369   4 
  12   6   0 0.02301 3.27199   2 
 -12   6   0 3.33378 2.82983   2 
  12   6   0 -0.7919 2.09045   3 
 -14  -6   0 -6.9856 3.40041   2 
  14  -6   0 -0.4901 2.98590   3 
 -14  -6   0 0.69392 2.88997   3 
 -14  -6   0 -1.4805 1.77466   4 
  14   6   0 4.74150 4.12186   2 
  14   6   0 0.77066 1.54688   4 
 -14   6   0 1.73838 3.18157   2 
 -14   6   0 0.08442 1.42463   4 
 -14   6   0 0.77675 3.28637   3 
  14   6   0 -2.2718 2.25519   3 
  16  -6   0 92.7253 7.87262   3 
 -16  -6   0 78.3441 9.45750   2 
 -16  -6   0 86.5995 7.71938   3 
 -16  -6   0 97.4736 5.62149   4 
  16   6   0 105.217 7.61910   3 
 -16   6   0 77.9350 8.24263   2 
  16   6   0 95.4616 9.18690   2 
 -16   6   0 95.5831 4.36403   4 
 -16   6   0 95.6427 7.89701   3 
 -18  -6   0 7.46117 3.08907   4 
 -18  -6   0 9.85450 6.05398   2 
  18  -6   0 7.81207 4.69848   3 
 -18  -6   0 2.45930 4.69603   3 
 -18   6   0 3.17121 2.48559   4 
  18   6   0 1.99291 6.01015   2 
  18   6   0 2.30056 4.02789   3 
 -18   6   0 5.05323 6.50985   2 
 -18   6   0 10.9428 5.13305   3 
 -20  -6   0 5.21316 3.96835   4 
 -20  -6   0 -8.1423 5.95608   3 
  20  -6   0 8.99146 6.17032   3 
 -20  -6   0 3.21019 7.62020   2 
  20   6   0 5.05683 5.66698   3 
 -20   6   0 5.77805 6.20125   3 
  20   6   0 12.5065 8.20346   2 
 -20   6   0 12.6031 7.08329   2 
 -20   6   0 6.05872 3.42681   4 
 -22  -6   0 -6.3547 9.14871   2 
  22  -6   0 -6.3495 7.40487   3 
 -22   6   0 -7.0884 7.91194   2 
  22   6   0 4.57198 6.47832   3 
   1  -7   0 769.945 18.1565   3 
  -1  -7   0 748.945 18.4087   2 
  -1  -7   0 761.058 18.1625   3 
   1  -7   0 777.903 18.2034   2 
   1  -7   0 744.022 16.9627   4 
  -1   7   0 708.181 16.8213   4 
   1   7   0 774.690 18.0947   3 
  -1   7   0 778.443 18.3003   2 
   1   7   0 766.358 18.4191   2 
  -1   7   0 753.605 18.0590   3 
   1   7   0 702.217 17.0121   4 
  -3  -7   0 24.9599 2.68067   2 
  -3  -7   0 21.9693 1.51698   4 
  -3  -7   0 20.4567 2.29954   3 
   3  -7   0 21.3574 1.15779   4 
   3  -7   0 20.5365 2.03582   2 
  -3   7   0 20.8944 2.27666   2 
   3   7   0 26.8336 2.23539   3 
   3   7   0 18.7988 2.34458   2 
  -3   7   0 23.0744 0.90707   4 
  -3   7   0 19.6991 2.19200   3 
   3   7   0 23.4932 1.46961   4 
  -5  -7   0 42.5524 3.68231   2 
  -5  -7   0 39.9130 2.18523   4 
  -5  -7   0 38.9287 3.00815   3 
   5   7   0 46.4419 2.89691   3 
  -5   7   0 39.0213 2.92360   3 
   5   7   0 40.9190 2.03712   4 
   5   7   0 35.4507 3.62210   2 
  -5   7   0 40.3247 3.32042   2 
  -7  -7   0 957.110 24.5287   2 
  -7  -7   0 956.792 22.1087   4 
  -7  -7   0 965.852 23.3831   3 
  -7   7   0 950.798 23.4183   2 
  -7   7   0 952.502 23.4349   3 
   7   7   0 920.979 21.9585   4 
   7   7   0 955.102 23.3163   3 
   7   7   0 948.161 24.3604   2 
  -7   7   0 940.397 23.3481   2 
  -9  -7   0 282.868 7.95638   4 
  -9  -7   0 274.565 9.18941   3 
  -9  -7   0 276.578 10.4099   2 
   9   7   0 281.550 9.20475   3 
   9   7   0 286.432 10.4303   2 
  -9   7   0 289.816 9.42129   3 
   9   7   0 276.193 7.72897   4 
  -9   7   0 282.447 9.42203   2 
 -11  -7   0 552.500 17.3941   2 
 -11  -7   0 559.354 14.0836   4 
 -11  -7   0 511.558 17.4622   3 
  11   7   0 559.606 15.8342   3 
 -11   7   0 566.957 15.7992   3 
 -11   7   0 538.887 16.0388   2 
  11   7   0 545.069 13.9456   4 
 -11   7   0 560.972 12.6592   4 
 -13  -7   0 620.187 18.0802   3 
 -13  -7   0 634.406 20.0532   2 
 -13  -7   0 602.979 16.9819   4 
  13   7   0 610.911 19.2999   2 
  13   7   0 628.735 18.1387   3 
  13   7   0 638.992 16.0583   4 
 -13   7   0 630.126 14.6824   4 
 -13   7   0 638.574 18.9434   2 
 -13   7   0 632.469 17.9860   3 
 -15  -7   0 34.3841 4.77495   3 
 -15  -7   0 30.7528 5.86810   2 
 -15  -7   0 34.6793 3.55983   4 
  15  -7   0 34.3830 5.16925   3 
 -15   7   0 31.7150 4.88824   3 
  15   7   0 32.5883 3.19665   4 
  15   7   0 30.8596 4.59405   3 
  15   7   0 30.5796 5.49475   2 
 -15   7   0 30.9899 5.24000   2 
 -15   7   0 32.3536 2.93964   4 
 -17  -7   0 2.03038 2.53919   4 
  17  -7   0 1.46242 4.30164   3 
 -17  -7   0 4.29166 4.30232   3 
 -17  -7   0 4.37885 6.00550   2 
 -17   7   0 0.23028 2.00746   4 
 -17   7   0 0.61995 4.28360   3 
  17   7   0 -1.1831 4.00581   3 
 -17   7   0 1.76185 4.77447   2 
  17   7   0 5.03663 5.45742   2 
  19  -7   0 29.5165 6.55780   3 
 -19  -7   0 38.0933 4.43389   4 
 -19  -7   0 35.4611 7.03053   3 
 -19  -7   0 39.1616 8.57436   2 
 -19   7   0 30.9152 7.16705   2 
 -19   7   0 31.5676 3.65225   4 
  19   7   0 22.0808 7.93456   2 
  19   7   0 29.3155 6.03774   3 
 -19   7   0 42.3169 6.74779   3 
 -21  -7   0 79.7392 8.67299   4 
 -21  -7   0 73.9963 11.1861   2 
  21   7   0 99.1978 11.4741   3 
 -21   7   0 76.1215 8.98269   3 
 -21   7   0 72.5522 10.2607   2 
   0  -8   0 4.00831 0.80312   4 
   0  -8   0 3.26671 1.51078   3 
   0  -8   0 2.12561 1.46305   2 
   0   8   0 4.54345 0.68852   4 
   0   8   0 1.98888 1.59861   2 
   0   8   0 6.31531 1.43748   3 
  -2  -8   0 336.142 9.43202   3 
   2  -8   0 338.860 9.37909   2 
   2  -8   0 322.614 9.33589   3 
   2  -8   0 336.526 7.97174   4 
  -2  -8   0 328.047 8.28245   4 
  -2  -8   0 348.615 9.82684   2 
  -2   8   0 331.040 9.47933   2 
   2   8   0 337.651 9.26634   3 
  -2   8   0 332.185 9.26398   3 
  -2   8   0 331.709 7.77452   4 
   2   8   0 331.417 8.18725   4 
   2   8   0 336.154 9.78343   2 
  -4  -8   0 23.3835 2.66290   3 
  -4  -8   0 28.0146 3.07707   2 
  -4  -8   0 26.7708 1.88547   4 
   4  -8   0 26.6379 2.68448   2 
   4  -8   0 26.7828 1.31105   4 
   4   8   0 24.9800 2.48946   3 
  -4   8   0 25.4045 0.97541   4 
  -4   8   0 24.9046 2.68243   2 
  -4   8   0 29.6936 2.69883   3 
   4   8   0 21.4908 2.67582   2 
  -6  -8   0 48.0398 4.28303   2 
  -6  -8   0 42.0485 3.43076   3 
  -6  -8   0 39.4949 2.47995   4 
   6   8   0 45.9612 3.21419   3 
   6   8   0 41.1831 4.35271   2 
  -6   8   0 44.4448 3.85016   2 
   6   8   0 45.2810 2.33005   4 
  -6   8   0 44.8087 3.40755   3 
  -6   8   0 48.6343 3.88398   3 
  -8  -8   0 10.6449 2.36785   3 
  -8  -8   0 13.4805 3.01555   2 
  -8  -8   0 12.9070 1.65143   4 
   8   8   0 18.0201 2.56161   3 
  -8   8   0 19.6569 2.70687   2 
  -8   8   0 16.7186 2.69100   3 
  -8   8   0 17.9836 2.78162   2 
   8   8   0 11.4893 3.17759   2 
   8   8   0 9.86538 1.20246   4 
 -10  -8   0 522.221 14.7993   3 
 -10  -8   0 494.126 12.9818   4 
 -10  -8   0 489.174 15.9435   2 
  10   8   0 506.297 15.9828   2 
 -10   8   0 493.468 14.6907   2 
  10   8   0 502.982 14.5660   3 
 -10   8   0 500.796 14.6107   3 
  10   8   0 514.791 12.8923   4 
 -12  -8   0 26.9566 3.19909   4 
 -12  -8   0 24.7953 3.71455   3 
 -12  -8   0 26.6404 4.72065   2 
  12   8   0 24.7082 2.93013   4 
 -12   8   0 33.6423 4.29649   2 
 -12   8   0 28.7092 4.68616   3 
  12   8   0 36.6940 4.07950   3 
  12   8   0 25.9740 4.60033   2 
 -14  -8   0 61.7127 6.49568   3 
 -14  -8   0 60.6496 4.50581   4 
 -14  -8   0 69.8972 7.66764   2 
 -14   8   0 58.0684 2.96025   4 
 -14   8   0 66.8335 7.06776   2 
  14   8   0 37.8995 5.68163   2 
  14   8   0 55.7412 5.77264   3 
  14   8   0 61.7110 4.06835   4 
 -14   8   0 57.0875 6.36788   3 
 -16  -8   0 40.3369 6.57382   2 
 -16  -8   0 48.2596 5.92796   3 
 -16  -8   0 61.5802 5.21230   4 
 -16   8   0 54.1072 6.11245   3 
 -16   8   0 51.1884 3.50817   4 
  16   8   0 50.5880 5.99905   3 
 -16   8   0 48.7542 6.38280   2 
  16   8   0 50.9576 7.17045   2 
 -18  -8   0 9.66159 5.57280   3 
 -18  -8   0 11.1831 3.36665   4 
 -18  -8   0 -1.1876 6.11423   2 
 -18   8   0 10.1897 2.61338   4 
  18   8   0 4.28787 6.90126   2 
 -18   8   0 8.14830 5.22605   3 
  18   8   0 -0.7240 4.25349   3 
 -20  -8   0 12.8518 7.97346   2 
 -20  -8   0 9.52882 4.46286   4 
 -20   8   0 7.31968 3.37512   4 
  20   8   0 5.24100 6.03446   3 
 -20   8   0 -3.4170 6.40390   3 
 -20   8   0 9.08095 7.09611   2 
 -22  -8   0 62.9197 12.0445   2 
 -22   8   0 38.1607 9.91003   2 
  22   8   0 29.7079 7.92457   3 
   1  -9   0 597.240 13.7583   4 
  -1  -9   0 600.774 15.2066   3 
   1  -9   0 589.604 15.1863   2 
   1  -9   0 583.390 15.1088   3 
  -1  -9   0 603.170 15.4703   2 
  -1   9   0 601.954 15.0860   3 
   1   9   0 559.386 13.7159   4 
  -1   9   0 572.737 13.5274   4 
  -1   9   0 607.571 15.3977   2 
   1   9   0 600.471 15.4894   2 
   1   9   0 596.375 15.0379   3 
   3  -9   0 40.1430 1.74516   4 
   3  -9   0 46.6813 3.25768   2 
  -3  -9   0 42.5794 3.74845   2 
   3  -9   0 43.2590 3.24037   3 
  -3  -9   0 45.2139 3.23364   3 
  -3  -9   0 33.4179 2.09350   4 
  -3   9   0 44.4853 3.04476   3 
   3   9   0 40.5805 2.90350   3 
   3   9   0 30.4853 1.93396   4 
   3   9   0 35.5746 3.62746   2 
  -3   9   0 45.4692 3.55210   2 
  -3   9   0 31.5360 1.39672   4 
  -5  -9   0 53.0220 3.73308   3 
  -5  -9   0 53.3876 2.76932   4 
  -5  -9   0 53.5708 4.47664   2 
   5   9   0 52.9755 4.32976   2 
  -5   9   0 52.6509 4.03524   2 
   5   9   0 55.2456 3.48823   3 
  -5   9   0 52.6589 3.60428   3 
   5   9   0 55.4303 2.59284   4 
  -7  -9   0 176.385 5.55665   4 
  -7  -9   0 165.977 6.69686   3 
  -7  -9   0 176.127 7.85130   2 
   7   9   0 180.350 5.37653   4 
  -7   9   0 176.301 6.97896   3 
  -7   9   0 171.890 6.73068   3 
  -7   9   0 166.342 6.91146   2 
   7   9   0 170.257 6.56924   3 
   7   9   0 173.637 7.78207   2 
  -9  -9   0 167.523 5.77953   4 
  -9  -9   0 175.140 7.26628   3 
  -9  -9   0 172.759 8.52328   2 
  -9   9   0 171.897 7.58496   2 
   9   9   0 174.284 7.02658   3 
   9   9   0 173.483 5.55721   4 
   9   9   0 171.925 8.29140   2 
  -9   9   0 172.065 7.33703   3 
  -9   9   0 171.179 7.32718   2 
 -11  -9   0 140.197 7.18927   3 
 -11  -9   0 129.911 8.41880   2 
 -11  -9   0 148.471 5.60663   4 
 -11   9   0 143.473 7.82896   2 
  11   9   0 143.833 5.35578   4 
  11   9   0 145.978 8.73906   2 
 -11   9   0 153.129 7.44392   2 
 -11   9   0 149.772 7.44723   3 
  11   9   0 144.033 7.11678   3 
 -13  -9   0 330.983 13.5627   2 
 -13  -9   0 304.836 9.84787   4 
 -13  -9   0 318.791 11.7359   3 
 -13   9   0 328.781 11.8317   3 
  13   9   0 299.039 11.4677   3 
  13   9   0 316.287 9.54412   4 
  13   9   0 295.862 12.9971   2 
 -13   9   0 318.444 12.2532   2 
 -15  -9   0 25.7903 4.91497   3 
 -15  -9   0 24.1590 3.35107   4 
 -15  -9   0 28.6958 5.90132   2 
  15   9   0 21.8045 3.99972   3 
 -15   9   0 26.3101 4.89803   3 
  15   9   0 26.4627 3.24781   4 
 -15   9   0 24.6548 5.13301   2 
  15   9   0 9.17984 5.06870   2 
 -17  -9   0 47.1079 8.18496   2 
 -17  -9   0 39.2247 6.21374   3 
 -17  -9   0 43.1390 4.48766   4 
  17   9   0 38.3297 5.88677   3 
 -17   9   0 27.7504 5.64499   3 
 -17   9   0 52.3811 6.99100   2 
  17   9   0 46.3159 7.70862   2 
 -19  -9   0 38.4406 7.19922   3 
 -19  -9   0 33.9388 4.83940   4 
 -19  -9   0 67.4671 9.74727   2 
 -19   9   0 38.9536 3.70967   4 
  19   9   0 34.5743 6.48878   3 
 -19   9   0 40.7439 7.64102   2 
  19   9   0 45.1075 9.36278   2 
 -19   9   0 30.8191 6.97899   3 
 -21  -9   0 3.52187 4.97732   4 
 -21  -9   0 -2.3697 8.82975   2 
 -21   9   0 7.11537 8.34886   2 
 -21   9   0 -4.1346 6.94523   3 
 -21   9   0 0.11843 3.83325   4 
  21   9   0 -7.3434 6.14644   3 
   0 -10   0 0.66644 1.72288   2 
   0 -10   0 4.19077 1.63546   3 
   0 -10   0 2.85970 0.89700   4 
   0  10   0 1.62260 0.73218   4 
   0  10   0 2.43576 1.91207   2 
   0  10   0 2.40150 1.59702   3 
  -2 -10   0 566.438 15.4626   2 
   2 -10   0 575.109 15.0166   2 
  -2 -10   0 575.251 15.1014   3 
   2 -10   0 587.011 13.3998   4 
   2 -10   0 571.392 15.0552   3 
  -2  10   0 561.818 13.1006   4 
   2  10   0 574.787 15.5331   2 
  -2  10   0 562.446 15.1774   2 
   2  10   0 570.095 14.8801   3 
  -2  10   0 579.175 14.9429   3 
   2  10   0 562.637 13.5164   4 
  -4 -10   0 500.904 14.6727   2 
  -4 -10   0 520.183 12.7334   4 
  -4 -10   0 529.737 14.1664   3 
   4 -10   0 529.432 13.8616   2 
   4 -10   0 518.573 12.0262   4 
   4  10   0 486.187 13.1326   4 
   4  10   0 517.657 14.7609   2 
  -4  10   0 523.817 11.7235   4 
  -4  10   0 510.408 13.8588   3 
   4  10   0 520.733 13.8969   3 
  -4  10   0 508.819 14.0677   2 
  -6 -10   0 1.99398 2.25955   2 
  -6 -10   0 2.69994 1.35871   4 
  -6 -10   0 -0.1811 1.82423   3 
  -6  10   0 2.47356 2.30088   2 
  -6  10   0 0.94796 1.70682   3 
   6  10   0 3.24789 2.58038   2 
   6  10   0 0.15315 1.38986   3 
   6  10   0 2.41876 1.64029   4 
  -8 -10   0 245.705 8.91182   3 
  -8 -10   0 260.800 10.1487   2 
  -8  10   0 248.329 8.88786   3 
   8  10   0 235.572 9.81646   2 
  -8  10   0 248.688 9.15210   2 
   8  10   0 253.124 7.25252   4 
   8  10   0 252.465 8.76643   3 
  -8  10   0 241.735 9.04371   3 
 -10 -10   0 388.482 13.8149   2 
 -10 -10   0 371.265 10.5057   4 
 -10 -10   0 386.069 12.3715   3 
  10  10   0 374.495 10.3032   4 
  10  10   0 363.363 12.0003   3 
 -10  10   0 398.364 12.7411   2 
 -10  10   0 371.547 12.2324   2 
 -10  10   0 385.476 12.4005   3 
  10  10   0 353.159 13.7527   2 
 -12 -10   0 684.821 17.5025   4 
 -12 -10   0 658.088 21.4089   2 
 -12 -10   0 672.118 19.4649   3 
 -12  10   0 666.077 19.3328   3 
 -12  10   0 676.846 19.5650   2 
  12  10   0 715.668 17.4865   4 
  12  10   0 677.448 19.3284   3 
  12  10   0 672.579 21.0871   2 
 -14 -10   0 276.792 11.4497   3 
 -14 -10   0 280.120 13.4944   2 
 -14 -10   0 296.099 9.65503   4 
 -14  10   0 274.068 11.9763   2 
 -14  10   0 263.814 11.4296   3 
  14  10   0 295.447 9.30560   4 
  14  10   0 275.957 13.3956   2 
  14  10   0 275.800 11.2800   3 
 -14  10   0 283.809 12.8254   2 
 -16 -10   0 64.0492 9.62108   2 
 -16 -10   0 80.1460 6.12438   4 
 -16 -10   0 86.3581 8.50404   3 
 -16  10   0 78.1997 8.80004   2 
 -16  10   0 72.1506 7.15768   3 
  16  10   0 86.1117 10.1972   2 
  16  10   0 69.5779 7.62266   3 
 -18 -10   0 71.7812 9.46654   2 
 -18 -10   0 57.5904 7.76907   3 
 -18 -10   0 78.5257 6.90470   4 
 -18  10   0 64.7546 7.49696   3 
  18  10   0 67.7347 7.57420   3 
  18  10   0 72.1339 10.1473   2 
 -18  10   0 54.2224 7.69485   2 
 -20 -10   0 18.0677 9.15806   2 
 -20 -10   0 15.5863 5.11193   4 
 -20  10   0 11.0888 7.30586   3 
  20  10   0 12.7521 6.37263   3 
 -20  10   0 27.1690 8.40691   2 
 -22 -10   0 17.1687 10.6898   2 
 -22  10   0 0.12078 9.41773   2 
  22  10   0 16.5513 7.59292   3 
  -1 -11   0 69.2904 4.31569   3 
  -1 -11   0 64.5088 4.57660   2 
   1 -11   0 74.3057 4.38436   3 
   1 -11   0 73.7901 4.41605   2 
  -1  11   0 63.5457 3.95920   3 
   1  11   0 65.5700 2.65972   4 
   1  11   0 69.5581 3.95331   3 
  -1  11   0 68.2894 2.49354   4 
   1  11   0 60.4280 4.59541   2 
  -1  11   0 66.9339 4.54907   2 
  -3 -11   0 338.588 10.9505   2 
   3 -11   0 338.384 8.45332   4 
   3 -11   0 341.308 10.1865   2 
   3 -11   0 330.322 10.3029   3 
  -3 -11   0 342.003 10.4140   3 
  -3 -11   0 344.165 8.96218   4 
   3  11   0 335.827 8.72042   4 
  -3  11   0 347.363 10.5729   2 
  -3  11   0 339.426 10.1941   3 
   3  11   0 344.841 10.9439   2 
   3  11   0 341.447 10.1710   3 
  -3  11   0 332.095 8.09544   4 
  -5 -11   0 7.86855 2.63211   2 
   5 -11   0 10.3309 1.16722   4 
  -5 -11   0 10.5624 2.39184   3 
   5 -11   0 7.34814 2.27410   2 
  -5 -11   0 14.2016 1.91006   4 
   5  11   0 11.3385 1.51562   4 
   5  11   0 12.3499 2.92208   2 
   5  11   0 12.9638 2.39691   3 
  -5  11   0 9.15575 2.18434   3 
  -5  11   0 7.84900 2.57824   2 
  -7 -11   0 3.81084 2.72123   2 
  -7 -11   0 -0.8241 1.98436   3 
  -7 -11   0 2.00516 1.45732   4 
   7  11   0 2.07994 2.83350   2 
  -7  11   0 0.03894 1.95955   3 
   7  11   0 2.77509 1.86216   3 
   7  11   0 2.05869 1.08429   4 
  -7  11   0 0.90303 2.38981   2 
  -9 -11   0 2.57921 1.71262   4 
  -9 -11   0 1.49808 3.34163   2 
  -9 -11   0 0.51312 2.22611   3 
   9  11   0 -0.8682 1.92007   3 
  -9  11   0 0.58509 2.85673   2 
   9  11   0 2.04592 1.14953   4 
   9  11   0 -0.3837 3.29366   2 
  -9  11   0 1.60069 2.44467   3 
  -9  11   0 7.20203 2.60606   2 
  -9  11   0 3.00356 2.83277   3 
 -11 -11   0 67.0863 6.11655   3 
 -11 -11   0 64.8778 4.31992   4 
 -11 -11   0 75.4915 7.61759   2 
  11  11   0 75.0225 5.65006   3 
 -11  11   0 76.6220 6.86469   2 
 -11  11   0 82.9808 6.24240   2 
 -11  11   0 77.8530 8.77030   3 
  11  11   0 70.7720 7.72802   2 
  11  11   0 61.6248 3.94093   4 
 -13 -11   0 10.0698 4.67503   2 
 -13 -11   0 13.6090 2.79160   4 
 -13 -11   0 15.5556 4.07426   3 
 -13  11   0 14.1824 4.14944   3 
 -13  11   0 20.1810 4.87178   2 
  13  11   0 13.6993 3.74123   3 
 -13  11   0 20.5533 4.28860   2 
  13  11   0 14.2536 4.84809   2 
  13  11   0 14.5429 2.65580   4 
 -15 -11   0 4.01271 2.72629   4 
 -15 -11   0 -8.0497 5.32262   2 
 -15 -11   0 -6.2559 4.01907   3 
  15  11   0 9.68939 4.96111   2 
 -15  11   0 -0.6253 5.16628   2 
 -15  11   0 1.19630 4.29018   3 
 -15  11   0 -1.9741 4.18935   2 
  15  11   0 -1.3431 2.12749   4 
 -17 -11   0 11.7417 5.17359   3 
 -17 -11   0 18.9413 3.97239   4 
  17  11   0 19.5027 5.05213   3 
 -17  11   0 2.31143 6.59251   2 
 -17  11   0 13.0970 5.24894   3 
  17  11   0 3.24482 6.89517   2 
 -17  11   0 15.6386 5.94067   2 
 -19 -11   0 -0.9518 4.19544   4 
 -19 -11   0 -23.078 7.41188   2 
 -19  11   0 18.2963 6.86362   3 
 -19  11   0 12.4738 7.02400   2 
  19  11   0 1.05607 5.42357   3 
 -19  11   0 16.4139 8.99295   2 
 -21 -11   0 -4.4367 10.2807   2 
 -21 -11   0 11.4496 6.02872   4 
 -21  11   0 2.81237 8.53703   2 
  21  11   0 18.2037 7.33252   3 
   0 -12   0 779.913 18.0287   4 
   0 -12   0 767.698 19.7400   3 
   0 -12   0 755.874 19.8251   2 
   0  12   0 770.784 20.0437   2 
   0  12   0 746.254 17.6674   4 
   0  12   0 756.820 19.4435   3 
  -2 -12   0 910.760 23.8590   2 
   2 -12   0 952.048 23.5526   2 
   2 -12   0 931.712 23.5565   3 
  -2 -12   0 953.428 23.7210   3 
   2 -12   0 959.157 21.6477   4 
  -2  12   0 929.250 23.6511   2 
  -2  12   0 933.755 21.2760   4 
   2  12   0 941.186 24.0761   2 
   2  12   0 933.501 23.3168   3 
   2  12   0 925.737 21.6810   4 
  -2  12   0 944.476 23.3820   3 
  -4 -12   0 557.993 15.3944   3 
   4 -12   0 536.790 12.9588   4 
   4 -12   0 546.760 14.9715   2 
   4 -12   0 534.973 15.1596   3 
  -4 -12   0 547.060 13.6676   4 
  -4 -12   0 545.016 15.8624   2 
   4  12   0 551.951 13.4453   4 
  -4  12   0 556.631 12.6161   4 
  -4  12   0 540.221 15.3640   2 
  -4  12   0 543.952 15.0010   3 
   4  12   0 543.135 15.9332   2 
   4  12   0 537.129 14.9782   3 
  -6 -12   0 115.452 6.95605   2 
  -6 -12   0 129.335 6.27353   3 
  -6 -12   0 116.797 4.67169   4 
   6  12   0 112.439 5.66706   3 
  -6  12   0 119.472 6.43963   2 
   6  12   0 125.456 6.99195   2 
  -6  12   0 119.543 5.81022   3 
   6  12   0 123.706 4.43481   4 
  -8 -12   0 90.7897 6.06952   3 
  -8 -12   0 106.883 7.48432   2 
  -8 -12   0 103.836 4.57987   4 
   8  12   0 105.508 4.28759   4 
  -8  12   0 104.725 6.47266   3 
   8  12   0 104.717 7.45277   2 
  -8  12   0 97.6740 5.88920   3 
   8  12   0 111.941 5.91212   3 
  -8  12   0 105.866 6.53508   2 
 -10 -12   0 164.020 8.20487   3 
 -10 -12   0 167.752 6.51124   4 
 -10 -12   0 173.455 9.92598   2 
 -10  12   0 173.595 10.0646   3 
 -10  12   0 188.002 8.44407   3 
  10  12   0 171.962 7.83802   3 
 -10  12   0 189.648 8.86919   2 
  10  12   0 172.908 6.18121   4 
  10  12   0 173.411 9.66106   2 
 -10  12   0 170.246 8.23456   2 
 -12 -12   0 174.664 10.5620   2 
 -12 -12   0 177.913 7.18045   4 
 -12 -12   0 165.912 9.08156   3 
 -12  12   0 175.065 9.18595   3 
 -12  12   0 181.479 10.0154   2 
  12  12   0 186.297 8.76818   3 
  12  12   0 181.855 6.80790   4 
  12  12   0 172.156 10.9567   2 
 -12  12   0 184.012 9.20462   2 
 -12  12   0 187.011 9.37022   3 
 -14 -12   0 135.908 9.04365   3 
 -14 -12   0 132.994 10.9757   2 
 -14 -12   0 143.024 7.02094   4 
  14  12   0 138.924 6.47408   4 
  14  12   0 128.212 8.37850   3 
 -14  12   0 154.119 10.4757   2 
 -14  12   0 154.889 9.43279   2 
  14  12   0 145.437 11.2371   2 
 -14  12   0 141.681 9.03693   3 
 -16 -12   0 74.6421 8.80616   2 
 -16 -12   0 66.3701 7.51452   3 
 -16 -12   0 91.5860 6.97827   4 
 -16  12   0 75.2364 8.97638   2 
 -16  12   0 88.8273 9.53578   2 
 -16  12   0 88.6009 9.28090   3 
  16  12   0 89.4788 9.62533   2 
  16  12   0 74.9318 8.22885   3 
 -18 -12   0 98.8838 11.3653   2 
 -18 -12   0 68.2936 8.30905   3 
 -18 -12   0 107.843 7.96065   4 
  18  12   0 96.0306 10.8717   2 
 -18  12   0 88.8003 8.91883   3 
  18  12   0 98.3824 10.2128   3 
 -18  12   0 85.1816 9.09163   2 
 -18  12   0 98.0111 10.7816   2 
 -20 -12   0 39.3504 9.57863   2 
 -20 -12   0 10.5513 5.47698   4 
 -20  12   0 18.0679 8.53552   2 
 -20  12   0 39.2422 10.5032   2 
  20  12   0 20.9541 6.66797   3 
 -20  12   0 22.7830 8.08255   3 
   1 -13   0 14.1852 2.74561   3 
   1 -13   0 16.6928 2.94233   2 
  -1 -13   0 14.7840 2.86763   2 
  -1 -13   0 14.0337 2.70962   3 
  -1 -13   0 13.2987 1.72912   4 
   1 -13   0 15.0932 1.69246   4 
  -1  13   0 14.3245 1.61759   4 
   1  13   0 17.4987 3.15108   2 
  -1  13   0 10.8942 2.21058   3 
  -1  13   0 17.0401 3.16814   2 
   1  13   0 10.8808 1.34937   4 
   1  13   0 15.9214 2.58892   3 
   3 -13   0 312.434 10.1685   2 
   3 -13   0 311.288 10.2803   3 
  -3 -13   0 317.628 10.3772   3 
  -3 -13   0 314.950 10.9217   2 
  -3 -13   0 307.354 8.67874   4 
   3 -13   0 313.108 8.21780   4 
  -3  13   0 312.485 10.5357   2 
   3  13   0 314.855 10.9352   2 
  -3  13   0 323.598 7.84567   4 
  -3  13   0 311.030 10.0290   3 
   3  13   0 310.785 8.40968   4 
   3  13   0 310.563 10.0216   3 
  -5 -13   0 87.7260 4.10224   4 
  -5 -13   0 89.9828 5.71636   3 
   5 -13   0 99.1118 5.35604   2 
   5 -13   0 89.9236 3.31531   4 
  -5 -13   0 96.3172 6.39508   2 
   5  13   0 93.1239 6.39654   2 
  -5  13   0 93.6090 6.01054   2 
   5  13   0 87.5592 5.16144   3 
  -5  13   0 85.0577 5.17782   3 
   5  13   0 96.0478 3.83083   4 
  -7 -13   0 37.0489 3.26892   4 
  -7 -13   0 43.9384 4.98293   3 
  -7 -13   0 30.0185 4.45262   2 
   7  13   0 36.5234 2.77445   4 
   7  13   0 39.0802 5.00548   2 
   7  13   0 38.3103 4.20325   3 
  -7  13   0 38.3743 4.48685   2 
  -7  13   0 34.6259 3.86391   3 
  -9 -13   0 -6.1633 2.81865   3 
  -9 -13   0 -3.0827 3.45673   2 
  -9 -13   0 0.57888 1.86958   4 
   9  13   0 4.05593 2.65802   3 
  -9  13   0 -0.9057 3.16238   3 
   9  13   0 6.03564 3.69597   2 
  -9  13   0 5.58833 2.98831   3 
   9  13   0 1.33661 1.51908   4 
  -9  13   0 1.90076 3.33853   2 
 -11 -13   0 164.907 8.80735   3 
 -11 -13   0 159.850 6.67633   4 
 -11 -13   0 162.434 10.0204   2 
  11  13   0 162.882 8.12759   3 
 -11  13   0 167.110 9.18024   3 
 -11  13   0 152.956 8.36107   2 
  11  13   0 163.127 10.3260   2 
  11  13   0 161.448 6.30600   4 
 -11  13   0 157.723 8.60138   3 
 -13 -13   0 35.1247 3.83285   4 
 -13 -13   0 36.2125 5.40981   3 
 -13 -13   0 25.5999 6.13531   2 
  13  13   0 33.8099 3.61462   4 
 -13  13   0 46.5031 5.95270   3 
  13  13   0 31.8554 6.34954   2 
 -13  13   0 41.9645 6.18661   2 
  13  13   0 27.1186 4.69263   3 
 -13  13   0 34.2045 5.16640   2 
 -13  13   0 37.4546 5.32644   3 
 -15 -13   0 55.7858 6.32705   4 
 -15 -13   0 59.6445 7.48338   3 
 -15 -13   0 63.9175 8.54053   2 
  15  13   0 57.4582 6.48149   3 
 -15  13   0 73.4215 8.47578   2 
  15  13   0 56.8054 5.16334   4 
 -15  13   0 60.4947 7.06239   3 
 -15  13   0 63.2977 8.15906   2 
  15  13   0 53.9926 8.37387   2 
 -17 -13   0 6.70209 3.76137   4 
 -17 -13   0 2.36053 7.06482   2 
 -17 -13   0 0.46324 6.05938   3 
  17  13   0 12.7456 7.60314   2 
 -17  13   0 11.3686 7.27537   2 
 -17  13   0 -0.0540 5.97606   3 
  17  13   0 4.08660 4.73691   3 
 -19 -13   0 52.9925 10.4724   2 
 -19 -13   0 77.2599 8.86130   4 
  19  13   0 67.9782 8.29539   3 
 -19  13   0 57.7108 11.3813   2 
 -19  13   0 50.1888 8.81742   3 
 -19  13   0 61.8647 8.98056   2 
   0 -14   0 14.2606 2.88468   2 
   0 -14   0 7.31842 2.63478   3 
   0 -14   0 7.45637 1.61847   4 
   0  14   0 9.02385 2.99226   2 
   0  14   0 7.25118 2.31658   3 
   0  14   0 5.85968 1.22237   4 
   2 -14   0 654.906 17.9112   2 
   2 -14   0 650.833 18.0181   3 
  -2 -14   0 664.324 18.1721   3 
  -2 -14   0 659.196 18.5408   2 
   2 -14   0 653.488 15.8347   4 
   2  14   0 650.363 18.4468   2 
  -2  14   0 670.851 17.8700   3 
  -2  14   0 659.164 18.1805   2 
   2  14   0 647.283 15.8133   4 
  -2  14   0 646.704 15.4134   4 
   2  14   0 653.523 17.7200   3 
  -4 -14   0 2.04596 1.56200   4 
  -4 -14   0 -0.0516 2.49404   3 
  -4 -14   0 1.41131 2.73353   2 
   4 -14   0 2.99687 2.60086   3 
   4 -14   0 3.97143 2.43558   2 
   4 -14   0 3.56244 1.26526   4 
   4  14   0 -4.6886 2.71570   2 
  -4  14   0 3.16558 0.95523   4 
   4  14   0 2.78188 2.13208   3 
  -4  14   0 -3.2439 2.56631   2 
   4  14   0 2.43860 1.29342   4 
  -4  14   0 4.02027 2.41150   3 
  -6 -14   0 133.325 7.23384   3 
   6 -14   0 134.152 4.11232   4 
  -6 -14   0 125.157 7.96371   2 
  -6 -14   0 134.567 5.39125   4 
   6  14   0 135.977 8.08256   2 
  -6  14   0 130.502 6.68195   3 
   6  14   0 125.686 6.45949   3 
   6  14   0 137.788 5.00157   4 
  -6  14   0 136.226 7.45037   2 
  -8 -14   0 136.695 5.78202   4 
  -8 -14   0 150.283 8.89358   2 
  -8 -14   0 131.899 7.50872   3 
   8  14   0 141.305 5.39148   4 
   8  14   0 143.673 7.19314   3 
  -8  14   0 146.730 7.41665   3 
   8  14   0 127.949 8.85984   2 
  -8  14   0 145.154 8.07433   2 
 -10 -14   0 109.737 9.05815   2 
 -10 -14   0 120.831 8.03285   3 
 -10 -14   0 132.633 5.99376   4 
 -10  14   0 112.571 8.12945   3 
  10  14   0 119.104 5.31921   4 
 -10  14   0 106.678 8.38528   2 
  10  14   0 114.889 7.15520   3 
  10  14   0 133.947 9.59137   2 
 -10  14   0 130.423 7.39982   2 
 -10  14   0 119.204 7.77813   3 
 -12 -14   0 4.36353 4.14469   3 
 -12 -14   0 0.30583 4.30456   2 
 -12 -14   0 -0.5915 2.50513   4 
  12  14   0 7.33995 5.15316   2 
 -12  14   0 0.35221 3.54207   3 
  12  14   0 6.74307 3.30379   3 
 -12  14   0 11.1336 5.10412   2 
  12  14   0 6.31934 2.27996   4 
 -12  14   0 3.22575 3.57821   2 
 -12  14   0 3.69383 4.32071   3 
 -14 -14   0 30.0647 5.67883   3 
 -14 -14   0 41.5692 4.60848   4 
 -14 -14   0 40.6633 11.8392   2 
  14  14   0 49.3666 7.65082   2 
 -14  14   0 45.1597 6.48415   3 
 -14  14   0 49.1333 6.15202   2 
 -14  14   0 40.5686 7.41421   2 
  14  14   0 66.1446 7.34821   3 
  14  14   0 47.3588 4.90659   4 
 -14  14   0 51.0949 6.75198   3 
 -16 -14   0 14.2773 7.28081   2 
 -16 -14   0 27.1948 6.53657   3 
 -16 -14   0 33.9018 4.70302   4 
 -16  14   0 20.2183 7.89168   2 
 -16  14   0 26.2239 6.76397   3 
  16  14   0 25.1680 7.47887   2 
  16  14   0 22.4296 5.52549   3 
 -16  14   0 16.8709 5.96011   2 
 -18 -14   0 5.54800 8.31259   2 
 -18 -14   0 8.16173 4.89951   4 
 -18  14   0 -14.403 6.66958   3 
  18  14   0 2.66283 5.68563   3 
 -18  14   0 11.3369 6.93825   2 
 -18  14   0 10.6332 9.37216   2 
 -20 -14   0 18.5254 10.5407   2 
 -20 -14   0 20.2959 6.53949   4 
 -20  14   0 15.3685 8.63319   2 
 -20  14   0 15.5859 11.3821   2 
  20  14   0 12.4270 7.25233   3 
   1 -15   0 285.213 8.08704   4 
  -1 -15   0 285.920 8.24375   4 
   1 -15   0 287.352 10.2024   2 
  -1 -15   0 276.362 10.4341   2 
   1 -15   0 279.059 10.1743   3 
  -1 -15   0 286.821 10.3195   3 
  -1  15   0 281.738 9.75978   3 
   1  15   0 284.914 10.5925   2 
  -1  15   0 277.001 7.59468   4 
   1  15   0 292.382 9.89870   3 
  -1  15   0 286.182 10.4499   2 
   1  15   0 270.841 7.74343   4 
   3 -15   0 444.825 11.5428   4 
  -3 -15   0 454.036 14.8691   3 
   3 -15   0 448.943 13.7646   2 
   3 -15   0 465.901 14.0721   3 
  -3 -15   0 459.997 12.2434   4 
  -3 -15   0 449.259 14.5321   2 
   3  15   0 436.063 11.6200   4 
   3  15   0 450.855 13.5713   3 
   3  15   0 466.915 14.6397   2 
  -3  15   0 449.530 11.1056   4 
  -3  15   0 449.320 14.1898   2 
  -3  15   0 452.422 13.6210   3 
   5 -15   0 392.293 10.1446   4 
   5 -15   0 395.620 12.4386   2 
  -5 -15   0 392.258 13.7704   2 
  -5 -15   0 396.928 11.1303   4 
  -5 -15   0 383.291 13.1566   3 
   5  15   0 395.418 10.8931   4 
  -5  15   0 400.683 12.7212   3 
   5  15   0 411.190 12.6949   3 
  -5  15   0 400.472 13.2237   2 
   5  15   0 401.864 13.8362   2 
  -7 -15   0 -0.2388 2.89629   3 
  -7 -15   0 1.28825 3.55372   2 
  -7 -15   0 1.16377 1.85966   4 
  -7  15   0 -0.7720 2.63167   3 
   7  15   0 2.34091 1.49723   4 
   7  15   0 -1.3406 2.40584   3 
  -7  15   0 4.31747 3.44949   2 
   7  15   0 2.63426 3.78314   2 
  -9 -15   0 240.004 8.42159   4 
  -9 -15   0 246.408 11.8367   2 
  -9 -15   0 251.988 10.7392   3 
  -9  15   0 234.944 10.1496   3 
  -9  15   0 232.337 10.6868   3 
   9  15   0 238.078 7.97235   4 
   9  15   0 253.753 10.0589   3 
  -9  15   0 252.684 10.9830   2 
   9  15   0 237.464 11.9252   2 
 -11 -15   0 11.4134 4.32935   3 
 -11 -15   0 9.92408 3.08424   4 
 -11 -15   0 11.7257 4.94600   2 
 -11  15   0 14.6369 4.12842   2 
  11  15   0 16.7453 5.31630   2 
 -11  15   0 12.3113 4.08795   3 
  11  15   0 12.6375 3.54570   3 
 -11  15   0 22.6890 5.27062   2 
  11  15   0 13.0988 2.49969   4 
 -11  15   0 16.9988 5.00303   3 
 -13 -15   0 144.404 7.79278   4 
 -13 -15   0 126.390 11.4168   2 
 -13 -15   0 146.128 10.2515   3 
  13  15   0 151.897 6.88087   4 
  13  15   0 129.786 12.0262   2 
  13  15   0 141.619 9.17978   3 
 -13  15   0 163.750 9.89428   3 
 -13  15   0 152.554 11.1701   2 
 -13  15   0 141.411 10.2195   3 
 -13  15   0 143.929 9.47146   2 
 -15 -15   0 -8.0250 5.63060   3 
 -15 -15   0 -2.4366 6.17496   2 
 -15 -15   0 -2.9057 3.48833   4 
 -15  15   0 13.8856 5.49301   2 
  15  15   0 -0.7298 4.11869   3 
 -15  15   0 0.64133 5.25741   3 
 -15  15   0 0.95240 6.31825   2 
 -15  15   0 -0.9597 4.87406   3 
  15  15   0 0.37035 2.45542   4 
  15  15   0 10.9891 7.18425   2 
 -17 -15   0 83.1644 8.25157   4 
 -17 -15   0 79.0252 10.8291   2 
 -17  15   0 86.3264 11.1275   2 
 -17  15   0 79.8815 9.03789   3 
  17  15   0 90.6543 10.7889   2 
 -17  15   0 81.4389 9.32812   2 
 -17  15   0 111.750 12.5929   3 
  17  15   0 99.9303 10.5323   3 
 -19 -15   0 25.7055 9.66308   2 
 -19 -15   0 22.1034 6.38076   4 
 -19  15   0 42.9181 8.69695   3 
 -19  15   0 38.2633 11.4549   2 
  19  15   0 30.3604 7.42431   3 
 -19  15   0 35.5657 8.89751   2 
 -19  15   0 34.0344 8.91599   3 
   0 -16   0 205.967 10.3907   3 
   0 -16   0 200.577 8.98064   4 
   0 -16   0 228.058 9.27547   2 
   0  16   0 221.257 6.50904   4 
   0  16   0 227.810 8.64816   3 
   0  16   0 218.073 9.38520   2 
  -2 -16   0 36.7340 4.67885   2 
  -2 -16   0 29.1227 4.17937   3 
   2 -16   0 30.3452 3.95812   2 
   2 -16   0 30.7958 2.99034   4 
   2 -16   0 39.1207 4.71409   3 
  -2  16   0 36.7340 4.17309   3 
   2  16   0 34.3588 4.66476   2 
  -2  16   0 30.2908 2.42735   4 
  -2  16   0 34.4587 4.48299   2 
   2  16   0 35.8970 4.12513   3 
   2  16   0 36.3292 2.72800   4 
  -4 -16   0 51.2150 5.99318   3 
  -4 -16   0 57.0917 6.32375   2 
   4 -16   0 55.1455 5.49303   2 
   4 -16   0 67.7785 7.07144   3 
  -4 -16   0 61.6786 4.13961   4 
   4 -16   0 63.7983 3.46926   4 
   4  16   0 66.8519 5.31703   3 
   4  16   0 61.7106 6.29430   2 
   4  16   0 63.4091 3.57454   4 
  -4  16   0 60.6874 5.48548   3 
  -4  16   0 69.4037 6.30359   2 
  -6 -16   0 15.0299 2.62348   4 
  -6 -16   0 7.18367 3.58715   3 
   6 -16   0 15.0847 1.87435   4 
  -6 -16   0 17.9760 4.38220   2 
   6  16   0 12.3317 2.05569   4 
   6  16   0 14.6298 3.26520   3 
   6  16   0 22.1537 4.76661   2 
  -6  16   0 11.9044 3.93373   2 
  -6  16   0 16.1016 3.74719   3 
  -8 -16   0 37.8822 5.16364   3 
  -8 -16   0 46.9331 4.36130   4 
  -8 -16   0 47.7942 6.39620   2 
   8  16   0 47.9767 6.44354   2 
  -8  16   0 46.0087 5.76192   2 
   8  16   0 40.5050 3.63262   4 
   8  16   0 57.9320 5.64746   3 
  -8  16   0 43.0741 5.18840   3 
 -10 -16   0 14.3618 4.50020   3 
 -10 -16   0 12.9280 5.28187   2 
 -10 -16   0 13.8526 3.35523   4 
 -10  16   0 20.5674 5.32205   2 
  10  16   0 8.97260 5.37044   2 
 -10  16   0 18.2690 4.24464   3 
  10  16   0 16.3100 2.74329   4 
  10  16   0 14.3425 4.04087   3 
 -10  16   0 12.3796 4.96696   3 
 -12 -16   0 15.4609 3.49349   4 
 -12 -16   0 1.66834 4.90286   2 
 -12 -16   0 -0.4378 4.66442   3 
  12  16   0 8.37923 2.52980   4 
 -12  16   0 12.2767 6.07708   2 
  12  16   0 9.36741 4.07983   3 
 -12  16   0 8.21787 5.20372   3 
 -12  16   0 -1.9072 3.89367   2 
  12  16   0 2.47378 5.42866   2 
 -12  16   0 12.6563 4.53245   3 
 -14 -16   0 -1.5510 3.43727   4 
 -14 -16   0 3.93949 5.57772   3 
 -14 -16   0 8.75131 6.28195   2 
 -14  16   0 10.6901 5.06003   2 
 -14  16   0 5.12569 4.80252   3 
  14  16   0 14.7312 7.02221   2 
  14  16   0 1.53248 2.67622   4 
 -14  16   0 -0.2776 6.42783   2 
 -14  16   0 13.3484 6.04128   3 
  14  16   0 1.85519 4.35684   3 
 -16 -16   0 -8.3115 7.43738   2 
 -16 -16   0 -1.4739 8.32248   3 
 -16 -16   0 0.87030 3.88413   4 
  16  16   0 4.01578 8.08204   2 
 -16  16   0 -5.6032 5.46513   3 
  16  16   0 14.4985 5.34289   3 
 -16  16   0 -6.3584 6.25297   3 
 -16  16   0 -1.2613 7.79177   2 
 -18 -16   0 -1.5564 5.45405   4 
 -18 -16   0 17.3375 9.68005   2 
 -18  16   0 6.28094 7.96820   3 
 -18  16   0 8.03181 7.66863   2 
 -18  16   0 -9.1505 9.66740   2 
 -18  16   0 -3.1362 7.05845   3 
  18  16   0 -7.9649 5.32264   3 
   1 -17   0 306.136 8.99802   4 
   1 -17   0 316.492 11.5159   2 
  -1 -17   0 305.223 9.18759   4 
   1 -17   0 308.813 11.6948   3 
  -1 -17   0 300.433 11.6862   2 
  -1 -17   0 298.293 11.5387   3 
  -1  17   0 299.685 10.8565   3 
  -1  17   0 300.720 11.6769   2 
   1  17   0 303.759 11.9354   2 
   1  17   0 328.309 11.0461   3 
  -1  17   0 300.440 8.45492   4 
   1  17   0 305.473 8.68269   4 
   3 -17   0 252.460 10.5677   3 
   3 -17   0 264.542 7.91439   4 
  -3 -17   0 265.020 10.7842   3 
   3 -17   0 264.652 10.2070   2 
  -3 -17   0 250.473 10.9823   2 
  -3  17   0 267.076 10.1825   3 
  -3  17   0 265.598 10.8217   2 
   3  17   0 258.992 11.1588   2 
   3  17   0 270.631 10.0965   3 
   3  17   0 263.994 7.95532   4 
  -5 -17   0 82.4968 7.58450   2 
   5 -17   0 79.5981 3.94010   4 
  -5 -17   0 84.1860 7.18903   3 
   5 -17   0 81.6038 6.39037   2 
  -5 -17   0 85.1704 4.96772   4 
   5  17   0 83.2139 6.13845   3 
   5  17   0 80.9286 7.82026   2 
  -5  17   0 81.2126 7.31815   2 
  -5  17   0 85.5542 6.27782   3 
  -7 -17   0 284.579 12.5768   2 
  -7 -17   0 276.751 11.7788   3 
  -7 -17   0 278.570 9.32163   4 
   7  17   0 275.975 12.5508   2 
  -7  17   0 262.465 11.7566   2 
   7  17   0 282.714 8.83118   4 
  -7  17   0 260.313 10.7733   3 
   7  17   0 259.821 10.5479   3 
  -9 -17   0 24.8650 5.62876   2 
  -9 -17   0 26.5287 3.45345   4 
  -9 -17   0 29.7012 5.36253   3 
  -9  17   0 32.1460 4.93709   3 
  -9  17   0 27.4971 5.34049   2 
   9  17   0 46.9177 7.12537   2 
   9  17   0 33.6913 3.87797   4 
   9  17   0 34.9399 4.79253   3 
 -11 -17   0 102.522 9.37226   3 
 -11 -17   0 106.685 10.7091   2 
 -11 -17   0 101.937 6.55530   4 
 -11  17   0 91.7857 9.36619   3 
  11  17   0 91.1115 8.26744   3 
 -11  17   0 100.070 8.18295   3 
  11  17   0 87.8035 10.6238   2 
 -11  17   0 101.356 10.2538   2 
 -11  17   0 111.120 8.42176   2 
  11  17   0 97.7148 5.79170   4 
 -13 -17   0 -2.1242 5.98759   2 
 -13 -17   0 -0.0711 3.51495   4 
 -13 -17   0 -7.4641 5.36969   3 
 -13  17   0 2.07934 6.27419   2 
  13  17   0 7.75359 6.49806   2 
  13  17   0 2.06329 4.12924   3 
 -13  17   0 5.01298 4.67938   3 
 -13  17   0 -1.8672 4.59448   2 
  13  17   0 -2.2928 2.54792   4 
 -13  17   0 -4.8342 5.28250   3 
 -15 -17   0 116.995 12.4448   3 
 -15 -17   0 109.626 8.74060   4 
 -15 -17   0 134.794 14.1206   2 
  15  17   0 127.399 15.1264   2 
 -15  17   0 102.938 10.5064   2 
 -15  17   0 112.396 13.6164   2 
  15  17   0 124.090 10.4936   3 
 -15  17   0 110.410 11.0750   3 
 -15  17   0 124.786 12.6171   3 
 -17 -17   0 49.3668 10.6321   2 
 -17 -17   0 61.8314 6.77142   4 
  17  17   0 52.8033 8.00611   3 
 -17  17   0 69.7075 8.91794   3 
 -17  17   0 56.6193 8.98086   2 
 -17  17   0 67.1326 9.64660   3 
 -17  17   0 60.0863 10.9835   2 
   0 -18   0 313.293 12.0903   2 
   0 -18   0 318.799 9.61979   4 
   0 -18   0 309.918 12.1560   3 
   0  18   0 326.929 11.6060   3 
   0  18   0 326.288 12.4723   2 
   0  18   0 317.001 9.07204   4 
   2 -18   0 -6.3772 3.51405   3 
  -2 -18   0 1.08660 3.68082   3 
  -2 -18   0 -2.4423 1.81354   4 
   2 -18   0 -2.1821 3.28602   2 
   2 -18   0 -0.8755 1.72733   4 
  -2 -18   0 3.52819 3.64867   2 
   2  18   0 -5.4166 3.60689   2 
  -2  18   0 1.35665 3.81454   2 
  -2  18   0 -3.7215 2.70948   3 
   2  18   0 -1.0626 2.59989   3 
   2  18   0 -1.8562 1.37712   4 
  -2  18   0 -2.2320 1.34683   4 
  -4 -18   0 53.3876 6.22388   2 
  -4 -18   0 41.5280 4.30670   4 
   4 -18   0 45.7073 3.57328   4 
   4 -18   0 51.4821 6.13000   2 
  -4 -18   0 57.0467 6.15015   3 
   4 -18   0 47.3448 5.61662   3 
   4  18   0 45.2981 3.78903   4 
   4  18   0 49.8500 5.07228   3 
   4  18   0 56.2375 6.41691   2 
  -4  18   0 52.3501 5.86072   3 
  -4  18   0 56.4397 6.09402   2 
  -6 -18   0 -0.7542 3.89581   3 
  -6 -18   0 2.75477 4.16864   2 
   6 -18   0 -0.9285 1.73931   4 
  -6 -18   0 2.02547 2.28459   4 
   6  18   0 4.78972 4.25229   2 
   6  18   0 3.16020 2.97690   3 
   6  18   0 2.96152 1.88550   4 
  -6  18   0 1.34412 4.02028   2 
  -6  18   0 3.90662 3.28837   3 
  -8 -18   0 59.5823 7.31534   2 
  -8 -18   0 70.9805 8.20387   3 
  -8 -18   0 58.5935 5.34043   4 
   8  18   0 62.2272 7.41254   2 
   8  18   0 52.1799 5.44237   3 
   8  18   0 61.9438 4.52977   4 
  -8  18   0 54.7433 6.64435   2 
  -8  18   0 55.3740 5.95006   3 
 -10 -18   0 0.21027 2.87694   4 
 -10 -18   0 1.33763 4.59897   3 
 -10 -18   0 0.02373 5.36130   2 
 -10  18   0 -5.3631 4.96709   3 
  10  18   0 4.25821 2.38075   4 
  10  18   0 2.31009 3.69064   3 
  10  18   0 4.08700 5.65447   2 
 -10  18   0 0.25112 5.37574   2 
 -10  18   0 1.25305 3.94723   3 
 -12 -18   0 -6.7679 5.91815   2 
 -12 -18   0 -3.1223 5.48034   3 
 -12 -18   0 3.53847 3.61715   4 
 -12  18   0 2.06379 4.44967   2 
 -12  18   0 9.75000 4.71473   3 
 -12  18   0 5.40154 6.23008   2 
  12  18   0 -2.1790 3.98423   3 
 -12  18   0 -5.1065 5.49323   3 
  12  18   0 7.86051 2.90710   4 
  12  18   0 9.34178 6.39788   2 
 -14 -18   0 5.46749 4.34285   4 
 -14 -18   0 4.81185 6.50855   3 
 -14 -18   0 13.7580 7.80043   2 
 -14  18   0 5.72212 5.75081   2 
 -14  18   0 6.93757 7.87381   2 
 -14  18   0 5.21876 5.49309   3 
  14  18   0 12.4533 8.55752   2 
  14  18   0 16.1823 5.65218   3 
 -14  18   0 -10.528 6.41700   3 
 -16 -18   0 17.9950 9.16193   2 
 -16 -18   0 12.7739 5.38859   4 
 -16  18   0 12.3130 8.12721   3 
 -16  18   0 17.2997 6.77705   2 
  16  18   0 22.3981 6.28617   3 
 -16  18   0 16.8451 6.82004   3 
 -16  18   0 1.83845 9.54206   2 
 -18  18   0 11.4383 8.40176   3 
   1 -19   0 188.069 10.0038   3 
  -1 -19   0 179.534 9.90713   3 
   1 -19   0 179.802 9.42543   2 
  -1 -19   0 199.321 10.0526   2 
   1 -19   0 187.767 6.94602   4 
   1  19   0 173.635 6.43072   4 
  -1  19   0 188.486 8.82583   3 
  -1  19   0 197.113 10.3239   2 
   1  19   0 192.106 8.80761   3 
  -1  19   0 176.793 6.22732   4 
  -3 -19   0 28.0734 5.37300   2 
  -3 -19   0 36.5949 5.56766   3 
   3 -19   0 33.1095 5.16129   3 
   3 -19   0 28.7934 3.08693   4 
   3 -19   0 27.4736 4.68717   2 
  -3  19   0 38.9399 5.47084   2 
   3  19   0 29.6208 2.93718   4 
   3  19   0 29.6384 4.17081   3 
   3  19   0 28.4471 5.31939   2 
  -3  19   0 31.9449 4.66943   3 
   5 -19   0 138.053 8.25301   2 
  -5 -19   0 136.639 9.43496   3 
   5 -19   0 144.520 5.60446   4 
  -5 -19   0 131.418 6.67750   4 
  -5 -19   0 139.326 9.92264   2 
   5  19   0 134.033 6.03594   4 
  -5  19   0 133.929 7.95330   3 
   5  19   0 140.950 9.89804   2 
   5  19   0 134.587 7.90837   3 
  -5  19   0 122.312 11.2298   2 
  -7 -19   0 65.0883 5.49805   4 
  -7 -19   0 61.2417 6.72873   3 
  -7 -19   0 59.1925 7.38398   2 
  -7  19   0 67.0641 7.16501   2 
   7  19   0 66.6751 7.46598   2 
   7  19   0 68.7505 4.67057   4 
  -7  19   0 56.7603 5.90011   3 
   7  19   0 63.5552 6.70421   3 
  -9 -19   0 45.1177 7.42869   2 
  -9 -19   0 47.6179 5.53461   4 
  -9 -19   0 46.1798 6.77597   3 
  -9  19   0 51.5794 7.22917   2 
   9  19   0 44.4123 7.81634   2 
   9  19   0 53.3940 4.80922   4 
  -9  19   0 47.5093 6.02042   3 
   9  19   0 46.3758 5.55228   3 
 -11 -19   0 13.3254 4.06130   4 
 -11 -19   0 4.69503 6.15032   3 
 -11 -19   0 16.5874 11.8406   2 
 -11  19   0 20.0269 6.99365   2 
 -11  19   0 18.8145 5.04879   2 
  11  19   0 1.14300 6.47642   2 
 -11  19   0 31.3845 6.79199   3 
  11  19   0 10.5612 4.68340   3 
  11  19   0 16.2431 3.31053   4 
 -11  19   0 6.36206 4.71182   3 
 -13 -19   0 161.959 14.7117   2 
 -13 -19   0 141.666 13.3379   3 
 -13 -19   0 153.586 9.46758   4 
 -13  19   0 172.871 11.2622   3 
 -13  19   0 136.692 13.7376   2 
 -13  19   0 152.737 13.1505   3 
  13  19   0 160.896 15.2377   2 
 -13  19   0 154.030 11.1549   2 
  13  19   0 165.749 11.2649   3 
 -15 -19   0 22.3048 5.53315   4 
 -15 -19   0 30.5495 9.57703   2 
 -15  19   0 15.7444 8.37457   3 
 -15  19   0 23.2925 7.42346   2 
  15  19   0 15.8861 6.06481   3 
  15  19   0 16.6726 10.7459   2 
 -15  19   0 22.4432 7.23344   3 
 -15  19   0 28.6043 9.82445   2 
 -17 -19   0 58.9868 11.6939   2 
 -17 -19   0 62.2260 7.69385   4 
 -17  19   0 45.7072 9.52341   3 
 -17  19   0 50.6129 9.17933   2 
  17  19   0 46.8423 8.72706   3 
 -17  19   0 65.5801 12.4479   2 
 -17  19   0 59.5680 9.43544   3 
   0 -20   0 43.2431 5.94870   3 
   0 -20   0 52.6469 4.57966   4 
   0 -20   0 42.4415 5.65841   2 
   0  20   0 47.0585 3.80466   4 
   0  20   0 72.2666 8.31999   2 
   0  20   0 50.2883 5.57999   3 
   2 -20   0 122.932 9.20767   3 
   2 -20   0 108.315 8.40883   2 
   2 -20   0 117.260 5.76269   4 
  -2 -20   0 113.985 9.18670   3 
  -2 -20   0 126.851 6.35934   4 
  -2 -20   0 118.483 9.31760   2 
  -2  20   0 115.840 9.44388   2 
   2  20   0 119.529 7.88498   3 
   2  20   0 114.626 5.45379   4 
   2  20   0 124.308 9.62586   2 
  -2  20   0 124.062 7.77316   3 
   4 -20   0 54.1565 5.83880   2 
   4 -20   0 44.4955 4.21434   4 
   4 -20   0 42.7161 6.25129   3 
  -4 -20   0 52.1424 6.43696   3 
  -4 -20   0 44.4881 5.87672   4 
  -4 -20   0 48.9091 6.76889   2 
   4  20   0 40.8019 4.30643   4 
   4  20   0 43.0374 6.57773   2 
   4  20   0 50.0009 5.86455   3 
  -4  20   0 49.8140 6.62112   2 
  -4  20   0 43.0844 5.19923   3 
   6 -20   0 69.0470 4.52861   4 
  -6 -20   0 71.6180 7.40302   3 
  -6 -20   0 73.5129 6.02650   4 
  -6 -20   0 70.7615 7.75768   2 
  -6  20   0 72.8475 7.62433   2 
   6  20   0 75.8217 5.18793   4 
   6  20   0 74.3476 7.26138   3 
  -6  20   0 74.1738 7.31551   3 
   6  20   0 75.2999 7.97307   2 
  -8 -20   0 16.3079 5.90252   2 
  -8 -20   0 8.78036 3.37246   4 
  -8 -20   0 12.7245 5.97867   3 
   8  20   0 11.9678 4.14094   3 
   8  20   0 14.8535 2.96423   4 
  -8  20   0 16.7492 5.61203   2 
   8  20   0 9.97687 6.38018   2 
  -8  20   0 6.27375 4.27597   3 
 -10 -20   0 135.822 11.6776   3 
 -10 -20   0 100.348 7.60586   4 
  10  20   0 109.191 6.59557   4 
  10  20   0 109.626 12.6243   2 
 -10  20   0 116.371 11.1597   3 
 -10  20   0 110.017 9.29250   3 
  10  20   0 112.063 9.44680   3 
 -10  20   0 100.281 11.9415   2 
 -12 -20   0 128.660 9.92487   4 
 -12 -20   0 119.329 13.1766   3 
 -12 -20   0 116.214 13.9608   2 
 -12  20   0 132.403 12.4689   3 
  12  20   0 127.118 10.4837   3 
 -12  20   0 125.156 10.7389   2 
 -12  20   0 120.588 13.2465   2 
 -12  20   0 107.246 10.4751   3 
  12  20   0 131.201 14.3014   2 
 -14 -20   0 39.0085 6.13833   4 
 -14 -20   0 47.5649 10.4400   2 
  14  20   0 42.0328 10.2101   2 
 -14  20   0 38.7679 8.94782   3 
 -14  20   0 55.6086 10.1194   2 
 -14  20   0 51.9955 7.92871   3 
  14  20   0 46.0095 7.70468   3 
 -14  20   0 55.0004 12.4237   2 
 -16 -20   0 47.9961 11.8973   2 
 -16  20   0 68.9652 12.8836   2 
 -16  20   0 41.0661 8.23332   3 
 -16  20   0 39.7850 10.2280   3 
 -16  20   0 41.5326 9.12309   2 
  16  20   0 47.8281 8.09728   3 
   1 -21   0 23.9712 5.31216   3 
   1 -21   0 15.9646 2.99576   4 
   1 -21   0 13.5506 4.75490   2 
  -1 -21   0 11.0719 2.94301   4 
  -1 -21   0 10.9250 5.13106   3 
  -1 -21   0 13.5257 5.29854   2 
  -1  21   0 9.94738 5.17246   2 
  -1  21   0 12.6211 4.14111   3 
   1  21   0 10.5201 3.88054   3 
   1  21   0 12.2937 5.38980   2 
  -3 -21   0 31.4278 6.21711   2 
  -3 -21   0 36.9399 6.37382   3 
  -3 -21   0 20.9153 3.37334   4 
   3 -21   0 31.2942 3.54383   4 
   3 -21   0 30.0722 5.42525   2 
   3 -21   0 30.2015 5.87026   3 
   3  21   0 26.8797 3.27074   4 
  -3  21   0 33.6700 4.92439   3 
  -3  21   0 30.7655 6.25027   2 
   3  21   0 33.9505 4.99448   3 
   3  21   0 27.2603 6.54730   2 
  -5 -21   0 2.87957 4.98047   2 
  -5 -21   0 -0.5000 2.97130   4 
   5 -21   0 5.85685 4.30054   2 
   5 -21   0 0.64670 2.40621   4 
  -5 -21   0 1.95460 4.91327   3 
   5  21   0 -1.1038 2.35838   4 
  -5  21   0 -2.6314 5.19162   2 
   5  21   0 2.19913 5.62698   2 
   5  21   0 3.48329 3.91313   3 
  -5  21   0 0.24958 3.70083   3 
  -7 -21   0 13.7173 6.34394   3 
  -7 -21   0 27.3109 6.38390   2 
  -7 -21   0 22.1470 3.89856   4 
   7 -21   0 18.0541 2.45228   4 
   7  21   0 15.0403 2.93838   4 
   7  21   0 13.7601 6.49998   2 
   7  21   0 16.2777 4.90246   3 
  -7  21   0 15.8590 4.82411   3 
  -7  21   0 12.3895 6.00764   2 
  -9 -21   0 5.62679 7.42277   2 
  -9 -21   0 -1.2207 3.46067   4 
  -9 -21   0 1.56218 6.31835   3 
  -9  21   0 3.46840 6.41457   2 
  -9  21   0 1.36155 4.38942   3 
   9  21   0 3.78708 2.76254   4 
   9  21   0 2.69578 4.34045   3 
   9  21   0 11.1097 7.51795   2 
 -11 -21   0 7.03460 4.34533   4 
 -11 -21   0 1.83870 7.21354   2 
 -11 -21   0 1.55899 7.15753   3 
 -11  21   0 1.34114 5.37928   2 
 -11  21   0 -8.3590 7.41741   2 
  11  21   0 -0.7677 5.16585   3 
  11  21   0 2.66696 7.57722   2 
 -11  21   0 4.85693 5.26788   3 
 -11  21   0 -4.1089 7.06123   3 
 -13 -21   0 5.11087 4.93211   4 
 -13 -21   0 -12.712 8.26936   2 
 -13  21   0 -2.5198 8.05974   3 
  13  21   0 3.12069 8.94543   2 
  13  21   0 -1.2882 5.63589   3 
 -13  21   0 5.84758 8.81853   2 
 -13  21   0 -7.9528 5.83693   2 
 -13  21   0 3.10277 6.23530   3 
 -15 -21   0 22.6128 6.33496   4 
 -15 -21   0 16.1553 10.5817   2 
  15  21   0 14.5482 6.75667   3 
 -15  21   0 8.50676 9.00857   3 
 -15  21   0 16.4173 10.8027   2 
 -15  21   0 16.0998 7.58381   3 
 -15  21   0 3.86083 7.09781   2 
   0 -22   0 56.2169 7.44697   3 
   0 -22   0 69.0681 7.23502   2 
   0 -22   0 49.3223 5.17188   4 
   0  22   0 57.0091 6.34278   3 
   0  22   0 65.3608 7.77463   2 
   2 -22   0 90.9150 5.88466   4 
   2 -22   0 89.5217 9.23541   2 
  -2 -22   0 96.2105 9.64486   4 
   2 -22   0 85.5623 9.71061   3 
  -2 -22   0 99.9004 10.1138   3 
  -2 -22   0 91.9865 9.91294   2 
   2  22   0 90.0457 10.5796   2 
  -2  22   0 97.0334 10.0974   2 
  -2  22   0 103.246 8.18810   3 
   2  22   0 101.580 8.34543   3 
   4 -22   0 173.774 11.4995   3 
  -4 -22   0 203.395 12.1654   2 
   4 -22   0 203.346 11.0996   2 
  -4 -22   0 181.652 12.2150   3 
   4 -22   0 189.442 7.59413   4 
   4  22   0 177.078 10.4824   3 
   4  22   0 181.120 12.9209   2 
  -4  22   0 202.700 10.4617   3 
  -4  22   0 192.507 12.1782   2 
   4  22   0 190.371 7.91461   4 
  -6 -22   0 46.9348 5.02881   4 
  -6 -22   0 50.5192 7.59330   3 
   6 -22   0 45.8977 4.74361   4 
  -6 -22   0 50.3510 7.94901   2 
  -6  22   0 47.8047 6.02070   3 
   6  22   0 46.5844 4.46709   4 
   6  22   0 42.0927 5.87373   3 
  -6  22   0 51.3023 7.64124   2 
   6  22   0 60.3705 8.48767   2 
  -8 -22   0 32.1964 7.83315   3 
  -8 -22   0 38.3144 9.55219   2 
  -8 -22   0 35.8917 5.05802   4 
   8  22   0 31.6210 8.35135   2 
   8  22   0 38.6307 6.15736   3 
  -8  22   0 32.0787 7.62803   2 
 -10 -22   0 89.2091 8.41081   4 
 -10 -22   0 60.7721 10.0716   3 
 -10 -22   0 60.7474 9.81550   2 
 -10  22   0 68.8667 9.40471   3 
 -10  22   0 68.0802 9.35910   2 
 -10  22   0 59.3576 7.22869   3 
  10  22   0 65.3772 7.67578   3 
  10  22   0 74.5721 10.5554   2 
 -12 -22   0 82.1080 9.66254   4 
 -12 -22   0 88.6642 11.9235   2 
  12  22   0 58.3706 10.3446   2 
 -12  22   0 73.1970 8.26856   3 
 -12  22   0 92.2671 11.4974   2 
 -12  22   0 83.1129 9.01120   2 
  12  22   0 97.3869 10.9260   3 
 -12  22   0 81.8051 10.7296   3 
 -14 -22   0 29.1662 10.6225   2 
 -14 -22   0 54.5050 7.57546   4 
 -14  22   0 44.9282 12.0827   2 
 -14  22   0 46.5277 8.81909   3 
 -14  22   0 40.0743 10.4301   3 
 -14  22   0 50.5869 8.55805   2 
  14  22   0 44.0035 8.11242   3 
   1 -23   0 27.5269 7.00289   3 
  -1 -23   0 21.6829 3.89144   4 
   1 -23   0 30.4164 6.13002   2 
  -1 -23   0 27.4576 6.47086   3 
   1 -23   0 23.1458 3.75239   4 
  -1 -23   0 22.1310 6.08016   2 
   1  23   0 13.7502 4.82690   3 
  -1  23   0 21.9000 6.55668   2 
   1  23   0 22.3518 7.01447   2 
  -3 -23   0 20.4194 4.25039   4 
  -3 -23   0 24.1846 6.50839   2 
   3 -23   0 14.3531 3.40470   4 
  -3 -23   0 21.0540 7.30025   3 
   3 -23   0 22.2741 6.74392   3 
   3 -23   0 21.0709 5.71701   2 
   3  23   0 15.9131 4.96109   3 
  -3  23   0 15.1214 6.38493   2 
  -3  23   0 22.5285 8.85691   3 
   3  23   0 25.2406 6.93423   2 
  -5 -23   0 12.8439 6.49557   2 
  -5 -23   0 10.6260 3.74256   4 
  -5 -23   0 6.66336 6.66981   3 
   5 -23   0 10.1146 3.21915   4 
   5 -23   0 6.74917 5.12246   2 
  -5  23   0 5.37042 6.38419   2 
  -5  23   0 15.6661 8.36001   3 
   5  23   0 14.3137 4.96154   3 
   5  23   0 16.4557 7.17168   2 
  -7 -23   0 -2.0718 12.0495   2 
  -7 -23   0 -2.0729 3.67914   4 
  -7 -23   0 0.15693 6.92823   3 
   7  23   0 -1.5484 7.15800   2 
   7  23   0 -2.4591 4.54469   3 
  -7  23   0 3.91187 4.91494   3 
  -7  23   0 -3.1658 6.90918   2 
  -9 -23   0 2.30903 7.28378   2 
  -9 -23   0 5.03201 7.65078   3 
  -9 -23   0 0.29966 4.17273   4 
  -9  23   0 -7.4620 5.23993   3 
   9  23   0 -1.9970 5.18652   3 
  -9  23   0 -4.3217 7.21292   2 
   9  23   0 4.84703 8.42368   2 
 -11 -23   0 44.4618 9.78090   2 
 -11 -23   0 15.1959 5.12212   4 
 -11  23   0 5.27710 8.98695   3 
  11  23   0 13.7818 9.29488   2 
 -11  23   0 23.8304 6.54129   3 
 -11  23   0 42.9224 9.81974   2 
  11  23   0 37.4809 7.15265   3 
 -13 -23   0 2.11891 6.21261   4 
 -13 -23   0 -13.844 9.69334   2 
 -13  23   0 -0.3088 6.87249   2 
  13  23   0 1.30611 6.45463   3 
 -13  23   0 -17.361 10.0476   2 
 -13  23   0 -20.733 9.15459   3 
 -13  23   0 -18.848 6.81030   3 
   0 -24   0 4.06105 5.80104   2 
   0 -24   0 2.73112 6.64525   3 
   0 -24   0 1.71213 3.25870   4 
   0  24   0 8.23295 6.64933   2 
   0  24   0 2.25667 4.58191   3 
   2 -24   0 11.2726 5.81269   2 
   2 -24   0 14.3773 6.70362   3 
   2 -24   0 16.0889 3.52699   4 
  -2 -24   0 15.5356 4.04544   4 
  -2 -24   0 11.3481 6.31099   2 
  -2 -24   0 17.7061 6.98263   3 
  -2  24   0 10.1715 5.09445   3 
   2  24   0 14.5325 6.98501   2 
   2  24   0 19.8258 5.35847   3 
  -2  24   0 18.6648 7.01777   2 
   4 -24   0 18.3883 5.67221   2 
  -4 -24   0 19.8713 7.12377   2 
   4 -24   0 23.6998 3.93081   4 
  -4 -24   0 30.4392 8.19049   3 
  -4  24   0 32.1908 7.74255   2 
   4  24   0 25.0157 5.94561   3 
  -4  24   0 25.8398 5.66990   3 
   4  24   0 22.7540 7.68390   2 
  -6 -24   0 36.8270 8.93192   3 
   6 -24   0 56.1288 5.51909   4 
  -6 -24   0 54.4355 5.81229   4 
   6  24   0 62.7536 7.64106   3 
  -6  24   0 57.9728 8.72023   2 
  -6  24   0 55.1782 7.00078   3 
   6  24   0 55.1466 9.37819   2 
  -8 -24   0 84.0620 8.59178   4 
  -8 -24   0 90.2167 11.0881   2 
   8  24   0 73.9545 8.20868   3 
  -8  24   0 69.3042 8.29212   3 
   8  24   0 77.3479 11.0841   2 
  -8  24   0 59.6168 9.85204   2 
 -10 -24   0 39.6820 10.1484   2 
 -10 -24   0 41.2478 6.21732   4 
 -10  24   0 27.9291 9.75518   3 
 -10  24   0 29.8376 9.92003   2 
  10  24   0 34.0348 10.1036   2 
 -10  24   0 37.4925 7.41150   3 
  10  24   0 42.8428 7.64330   3 
   1 -25   0 16.7054 6.52703   2 
   1 -25   0 15.5756 7.75071   3 
  -1 -25   0 2.75657 7.31760   3 
  -1 -25   0 19.7200 7.08823   2 
  -1 -25   0 29.0341 4.51582   4 
   1 -25   0 14.2206 4.04522   4 
  -1  25   0 14.2971 5.62637   3 
   1  25   0 16.5380 7.71263   2 
  -1  25   0 10.0512 7.44932   2 
   1  25   0 28.5348 6.44535   3 
  -3 -25   0 14.8839 7.03550   2 
  -3 -25   0 16.3490 8.23343   3 
   3 -25   0 15.4472 7.93475   3 
   3 -25   0 28.0138 6.57894   2 
   3 -25   0 33.5725 4.36669   4 
  -3  25   0 18.6782 7.56662   2 
   3  25   0 20.7017 6.31134   3 
  -3  25   0 27.7545 6.14163   3 
   3  25   0 7.78159 7.70584   2 
  -5 -25   0 33.0704 8.94594   3 
  -5 -25   0 32.9821 7.90189   2 
   5 -25   0 30.0609 4.42250   4 
   5 -25   0 28.4571 6.52228   2 
   5  25   0 40.3529 6.83645   3 
   5  25   0 31.7532 9.00856   2 
  -5  25   0 29.9576 8.66655   2 
  -5  25   0 34.6941 6.31867   3 
  -7 -25   0 19.3033 8.49825   2 
  -7 -25   0 9.26617 5.16576   4 
   7  25   0 5.61641 5.81078   3 
  -7  25   0 12.0486 6.16298   3 
   7  25   0 15.4939 9.18743   2 
  -7  25   0 21.7807 9.11941   2 
  -9 -25   0 10.5450 9.83554   2 
   9  25   0 15.9439 10.2710   2 
   9  25   0 14.4567 6.45600   3 
  -9  25   0 14.9329 10.2234   2 
  -9  25   0 20.9419 7.27694   3 
   0 -26   0 2.65643 6.71959   2 
   0 -26   0 2.75813 4.10865   4 
   0 -26   0 5.82761 8.51384   3 
   0  26   0 4.53570 5.92150   3 
   0  26   0 16.0026 8.26804   2 
   2 -26   0 7.77814 3.96863   4 
   2 -26   0 -5.6091 6.44277   2 
  -2 -26   0 -2.4245 7.92321   2 
   2 -26   0 6.35545 8.29719   3 
  -2 -26   0 4.38245 8.31873   3 
  -2 -26   0 -2.1458 4.19059   4 
  -2  26   0 -4.0504 7.95958   2 
   2  26   0 12.8819 6.08976   3 
   2  26   0 -9.5978 8.32993   2 
  -2  26   0 4.20274 5.60780   3 
  -4 -26   0 2.21030 5.32723   4 
   4 -26   0 4.12137 6.25750   2 
  -4 -26   0 -14.582 7.00773   2 
   4 -26   0 6.87198 4.10204   4 
  -4  26   0 -3.5570 5.64836   3 
  -4  26   0 9.27603 8.62280   2 
   4  26   0 -2.2296 8.43308   2 
   4  26   0 6.40572 5.93228   3 
   6 -26   0 23.5610 4.32878   4 
  -6 -26   0 30.2517 6.01169   4 
  -6 -26   0 15.5754 9.22191   2 
  -6  26   0 11.2999 9.33729   2 
   6  26   0 39.7116 10.6977   2 
  -6  26   0 21.1311 7.07223   3 
   6  26   0 21.1890 6.32270   3 
   1 -27   0 16.8649 5.11566   4 
  -1 -27   0 18.0645 5.11269   4 
  -1 -27   0 10.8339 7.91506   2 
   1  27   0 12.7176 9.94815   2 
  -1  27   0 10.1362 9.74567   2 
   1  27   0 15.0470 6.59396   3 
  -1  27   0 16.2947 6.56106   3 
   3 -27   0 14.1257 4.85357   4 
   3 -27   0 22.6085 7.74968   2 
  -3 -27   0 18.8647 5.00049   4 
  -3 -27   0 4.31607 8.29356   2 
   3  27   0 19.4185 9.87318   2 
  -3  27   0 20.0668 9.98248   2 
  -3  27   0 8.81644 6.77395   3 
   3  27   0 18.0685 6.62979   3 
  22   0  -1 2.66385 6.66448   3 
 -22   0   1 6.53775 8.40917   2 
 -20   0   1 3.57311 2.84561   4 
 -20   0   1 -1.4894 5.31086   3 
 -20   0   1 -6.3815 6.28040   2 
  20   0  -1 5.43735 6.68104   2 
  20   0  -1 -0.5519 5.26891   3 
 -18   0   1 0.69020 2.02515   4 
  18   0  -1 -2.0182 3.94631   3 
 -18   0   1 3.64726 4.96826   2 
 -18   0   1 -2.3923 4.12519   3 
  18   0  -1 1.82615 5.16406   2 
 -16   0   1 -1.5170 1.58535   4 
 -16   0   1 -4.5100 3.75237   2 
  16   0  -1 -0.3730 3.12644   3 
 -16   0   1 7.62571 3.72735   3 
  16   0  -1 7.02258 4.34783   2 
  14   0  -1 -0.0688 2.55172   3 
  14   0  -1 3.20773 3.32700   2 
 -14   0   1 -0.0852 1.19327   4 
 -14   0   1 2.09308 3.27384   2 
 -14   0   1 -2.8218 2.62073   3 
 -12   0   1 -0.1511 2.06539   3 
 -12   0   1 -0.4466 2.51455   2 
  12   0  -1 1.83898 2.10550   3 
 -12   0   1 -0.9272 0.96322   4 
  12   0  -1 -1.3670 2.46311   2 
 -10   0   1 -1.7967 1.59991   3 
  10   0  -1 -2.3350 1.45630   3 
 -10   0   1 -1.2931 2.15310   2 
 -10   0   1 -0.3058 0.72057   4 
  10   0  -1 0.19311 2.09628   2 
   8   0  -1 -0.4187 1.28890   3 
  -8   0   1 0.61976 1.30761   3 
   8   0  -1 -1.3527 1.46683   2 
  -8   0   1 -1.3347 1.50142   2 
  -8   0   1 0.50485 0.61907   4 
  -6   0   1 0.81173 1.30849   2 
   6   0  -1 -0.5581 1.20988   2 
  -6   0   1 0.74597 1.11030   3 
   6   0  -1 -0.5263 0.97913   3 
  -6   0   1 0.31603 0.50581   4 
   4   0  -1 0.86214 0.88668   3 
  -4   0   1 0.23903 0.97719   2 
  -4   0   1 0.99609 0.87558   3 
   4   0  -1 -0.4923 1.02758   2 
  -2   0   1 0.41864 0.48256   3 
   2   0  -1 2.57678 0.60697   2 
  -2   0   1 2.49596 0.59458   2 
   2   0  -1 -0.0753 0.49301   3 
  -2   0  -1 0.40505 0.40563   4 
   2   0   1 0.40750 0.40010   3 
  -2   0  -1 0.04346 0.57983   2 
   2   0   1 -0.1021 0.35357   4 
  -2   0  -1 0.25893 0.37926   3 
  -4   0  -1 0.40405 0.95860   2 
  -4   0  -1 0.48215 0.55468   4 
  -4   0  -1 -0.2608 0.78242   3 
   4   0   1 0.16410 0.42399   4 
   4   0   1 0.93588 1.02121   2 
   4   0   1 0.18035 0.78408   3 
  -6   0  -1 0.52836 1.23689   2 
   6   0   1 -0.7062 1.28673   2 
   6   0   1 -1.8725 0.85666   3 
  -6   0  -1 -0.4779 0.59137   4 
   6   0   1 0.56567 0.46968   4 
  -6   0  -1 -0.1004 1.13127   3 
  -8   0  -1 0.47402 1.51279   2 
   8   0   1 0.88885 1.32546   3 
   8   0   1 1.14247 1.73853   2 
   8   0   1 1.05222 0.58351   4 
  -8   0  -1 -0.4017 1.37253   3 
  -8   0  -1 -0.2094 0.77560   4 
 -10   0  -1 2.12835 2.06831   2 
 -10   0  -1 1.29402 1.74394   3 
  10   0   1 -0.0506 2.19126   2 
  10   0   1 -1.8007 1.54554   3 
  10   0   1 -0.7167 0.65718   4 
 -10   0  -1 0.31088 0.93235   4 
  12   0   1 3.08168 2.88537   2 
  12   0   1 0.06499 0.80391   4 
 -12   0  -1 1.08124 1.28311   4 
  12   0   1 -1.3317 1.88851   3 
 -12   0  -1 0.73591 2.01703   3 
 -12   0  -1 -0.0397 2.68277   2 
 -14   0  -1 -2.8036 1.52434   4 
  14   0   1 -7.1103 3.29576   2 
 -14   0  -1 -1.6115 3.05358   2 
 -14   0  -1 -0.9427 2.50081   3 
  14   0   1 -2.9556 2.41709   3 
  14   0   1 -0.1007 1.14853   4 
 -16   0  -1 -2.7351 4.20363   2 
  16   0   1 3.31157 4.31466   2 
 -16   0  -1 -0.4540 3.39019   3 
 -16   0  -1 0.16080 2.11749   4 
  16   0   1 -6.0167 2.93840   3 
  18   0   1 -1.1137 5.32441   2 
 -18   0  -1 2.73463 5.34144   2 
  18   0   1 -8.5790 3.91715   3 
 -18   0  -1 -3.8549 4.02985   3 
 -18   0  -1 3.97931 2.77980   4 
  20   0   1 -5.6814 4.73045   3 
 -20   0  -1 -10.784 6.20425   2 
 -20   0  -1 4.57074 5.24572   3 
 -20   0  -1 5.93403 3.91926   4 
  20   0   1 1.42503 7.50768   2 
  22   0   1 2.15958 6.54768   3 
 -22   0  -1 12.0284 8.67597   2 
  23  -1  -1 55.5939 8.89751   3 
 -23  -1   1 66.0818 11.7518   2 
 -23   1   1 53.4673 10.6689   2 
  23   1  -1 48.7070 8.70978   3 
 -21  -1   1 35.7804 4.31216   4 
  21  -1  -1 55.7910 9.87512   2 
 -21  -1   1 31.5573 8.77566   2 
  21  -1  -1 44.7843 7.53029   3 
 -21  -1   1 29.0355 6.59531   3 
  21   1  -1 36.0569 8.42922   2 
 -21   1   1 41.0993 9.08410   2 
  21   1  -1 48.3286 7.92865   3 
 -21   1   1 32.7877 7.25663   3 
 -21   1   1 36.4185 4.31018   4 
  19  -1  -1 0.81397 5.92573   2 
  19  -1  -1 0.68503 4.55526   3 
 -19  -1   1 0.23205 2.35490   4 
 -19  -1   1 1.90826 4.80627   3 
 -19  -1   1 3.12956 5.28116   2 
 -19   1   1 1.25314 2.36954   4 
 -19   1   1 -3.0085 4.75341   3 
 -19   1   1 9.25043 5.92749   2 
  19   1  -1 -3.4170 5.97391   2 
  19   1  -1 1.09712 4.49611   3 
 -17  -1   1 216.571 10.5926   3 
  17  -1  -1 240.486 11.1662   3 
  17  -1  -1 232.440 12.2235   2 
 -17  -1   1 259.520 12.8821   2 
 -17  -1   1 229.261 7.52944   4 
  17   1  -1 231.072 10.8938   3 
 -17   1   1 230.325 7.26696   4 
  17   1  -1 205.479 11.8063   2 
 -17   1   1 218.944 10.6156   3 
 -17   1   1 230.885 12.1547   2 
  15  -1  -1 357.767 12.8245   3 
 -15  -1   1 356.254 9.74288   4 
 -15  -1   1 351.049 12.4111   3 
 -15  -1   1 347.538 13.9285   2 
  15  -1  -1 353.700 13.4931   2 
 -15   1   1 364.790 12.5984   3 
  15   1  -1 341.842 13.3613   2 
  15   1  -1 342.496 12.6026   3 
 -15   1   1 370.229 13.9283   2 
 -15   1   1 368.312 9.63370   4 
 -13  -1   1 284.024 7.82404   4 
 -13  -1   1 275.492 11.2781   2 
  13  -1  -1 282.272 10.3827   3 
 -13  -1   1 283.707 9.99984   3 
 -13   1   1 280.689 10.2283   3 
  13   1  -1 280.064 10.3077   3 
 -13   1   1 291.960 7.63652   4 
  13   1  -1 287.367 11.2242   2 
 -13   1   1 273.005 11.0257   2 
 -11  -1   1 232.328 8.10552   3 
  11  -1  -1 230.306 8.48453   3 
  11  -1  -1 226.340 8.64361   2 
 -11  -1   1 225.951 6.22412   4 
 -11  -1   1 206.795 8.89975   2 
 -11   1   1 210.269 8.82857   2 
  11   1  -1 224.959 8.89880   2 
 -11   1   1 225.998 8.10027   3 
 -11   1   1 227.828 6.01380   4 
  11   1  -1 229.772 8.38163   3 
   9  -1  -1 112.685 5.16114   3 
   9  -1  -1 104.660 5.44463   2 
  -9  -1   1 106.785 5.71986   2 
  -9  -1   1 108.249 4.91412   3 
  -9  -1   1 113.412 3.48228   4 
  -9   1   1 114.359 3.33098   4 
  -9   1   1 104.866 4.88122   3 
   9   1  -1 113.597 5.67092   2 
  -9   1   1 109.846 5.52843   2 
  -7  -1   1 279.628 8.84225   2 
   7  -1  -1 291.533 8.41915   3 
   7  -1  -1 277.521 8.42976   2 
  -7  -1   1 287.244 6.94267   4 
  -7  -1   1 282.270 8.18200   3 
  -7   1   1 281.258 6.78366   4 
  -7   1   1 280.021 8.62181   2 
  -7   1   1 282.768 8.23337   3 
   7   1  -1 274.298 8.70740   2 
   7   1  -1 274.403 8.21260   3 
   5  -1  -1 1233.98 28.5493   3 
  -5  -1   1 1231.23 28.9804   2 
  -5  -1   1 1246.50 28.3849   3 
   5  -1  -1 1252.90 28.5658   2 
  -5  -1   1 1182.19 27.4763   4 
   5   1  -1 1241.86 28.4341   3 
  -5   1   1 1272.04 28.7071   2 
   5   1  -1 1242.83 28.9044   2 
  -3  -1   1 3798.45 85.6718   2 
   3  -1  -1 3943.94 85.3834   3 
   3   1  -1 3966.75 85.6242   2 
  -3   1   1 3931.87 85.2419   2 
  -3   1   1 3802.33 85.2868   3 
   3   1  -1 3870.15 85.1836   3 
   1  -1   1 0.01581 0.19881   3 
   3  -1   1 430.999 10.0772   4 
  -3  -1  -1 441.235 10.9351   2 
   3  -1   1 454.264 10.4630   3 
  -3  -1  -1 452.728 10.5800   3 
  -3  -1  -1 442.880 10.3273   4 
  -3   1  -1 449.320 10.9515   2 
   3   1   1 432.085 10.2319   4 
   3   1   1 438.431 10.8493   2 
  -3   1  -1 447.216 10.2066   4 
  -3   1  -1 447.535 10.4040   3 
   3   1   1 451.375 10.5975   3 
   5  -1   1 1591.23 36.4181   2 
  -5  -1  -1 1606.92 35.9250   3 
   5  -1   1 1553.14 34.9743   4 
  -5  -1  -1 1593.22 36.5028   2 
  -5  -1  -1 1556.95 35.3308   4 
   5  -1   1 1596.43 35.8849   3 
   5   1   1 1539.69 35.1532   4 
  -5   1  -1 1605.07 35.8185   3 
   5   1   1 1600.00 36.4392   2 
  -5   1  -1 1647.97 36.5057   2 
   5   1   1 1590.39 35.9529   3 
  -5   1  -1 1607.51 35.1878   4 
  -7  -1  -1 205.892 5.56644   4 
   7  -1   1 194.776 6.95518   2 
  -7  -1  -1 211.910 7.20432   2 
   7  -1   1 202.689 5.09891   4 
  -7  -1  -1 205.881 6.39212   3 
   7  -1   1 199.648 6.36252   3 
   7   1   1 205.993 5.29502   4 
  -7   1  -1 204.285 5.38852   4 
   7   1   1 200.901 6.34090   3 
  -7   1  -1 192.936 6.84415   2 
  -7   1  -1 208.249 6.33404   3 
   7   1   1 207.488 6.95342   2 
   9  -1   1 290.272 9.39752   2 
   9  -1   1 275.224 6.80172   4 
  -9  -1  -1 264.794 7.31129   4 
   9  -1   1 275.780 8.58166   3 
  -9  -1  -1 266.557 8.40467   3 
  -9  -1  -1 268.768 9.40625   2 
  -9   1  -1 279.270 7.20396   4 
   9   1   1 271.589 8.50378   3 
   9   1   1 278.414 9.28834   2 
  -9   1  -1 261.158 9.17836   2 
   9   1   1 268.930 6.96616   4 
  -9   1  -1 278.738 8.41738   3 
  11  -1   1 -2.2893 2.40935   2 
 -11  -1  -1 1.95323 1.21195   4 
  11  -1   1 3.12492 1.92512   3 
  11  -1   1 2.00963 0.82449   4 
 -11  -1  -1 0.74837 2.01152   3 
 -11  -1  -1 -1.2400 2.03124   2 
  11   1   1 1.43588 0.84325   4 
 -11   1  -1 1.30496 2.12711   2 
 -11   1  -1 0.90520 1.12443   4 
 -11   1  -1 1.36319 1.95453   3 
  11   1   1 2.75845 1.92055   3 
  11   1   1 1.83547 2.34775   2 
 -13  -1  -1 344.406 12.7008   2 
  13  -1   1 344.513 11.3584   3 
  13  -1   1 325.963 12.0863   2 
  13  -1   1 335.259 8.70134   4 
 -13  -1  -1 335.627 9.39181   4 
 -13  -1  -1 268.217 13.1530   3 
 -13   1  -1 331.138 11.2536   3 
 -13   1  -1 331.581 12.2405   2 
 -13   1  -1 334.805 9.22204   4 
  13   1   1 338.282 11.2491   3 
  13   1   1 330.757 8.82900   4 
  13   1   1 348.527 12.4040   2 
 -15  -1  -1 150.997 9.57798   2 
  15  -1   1 160.339 8.11272   3 
 -15  -1  -1 152.256 6.15271   4 
  15  -1   1 156.942 9.44912   2 
 -15  -1  -1 143.117 7.98977   3 
  15   1   1 154.574 9.43777   2 
  15   1   1 147.379 7.93613   3 
  15   1   1 145.326 5.25602   4 
 -15   1  -1 153.217 9.14199   2 
 -15   1  -1 143.091 5.79659   4 
 -15   1  -1 153.024 7.85933   3 
  17  -1   1 237.124 12.1619   2 
 -17  -1  -1 200.819 10.1666   3 
  17  -1   1 208.776 10.3543   3 
 -17  -1  -1 208.429 7.84222   4 
 -17  -1  -1 217.292 12.2643   2 
 -17   1  -1 182.948 11.5291   2 
 -17   1  -1 215.416 7.73435   4 
  17   1   1 216.571 10.4070   3 
  17   1   1 187.312 11.8362   2 
 -17   1  -1 198.179 10.0345   3 
  19  -1   1 325.288 14.2510   3 
 -19  -1  -1 352.194 14.2247   3 
  19  -1   1 337.209 16.8355   2 
 -19  -1  -1 330.641 16.1742   2 
 -19  -1  -1 325.438 11.4801   4 
  19   1   1 349.143 14.6269   3 
 -19   1  -1 327.335 11.3176   4 
 -19   1  -1 347.870 14.1455   3 
  19   1   1 330.924 16.6935   2 
 -19   1  -1 359.585 16.6890   2 
  21  -1   1 83.3513 8.90267   3 
 -21  -1  -1 111.703 11.6960   3 
 -21  -1  -1 86.4513 10.4590   2 
 -21   1  -1 100.120 11.6581   2 
  21   1   1 101.229 11.4384   3 
 -21   1  -1 83.0471 8.76610   3 
 -23  -1  -1 71.9653 11.7838   2 
  23  -1   1 60.6587 9.99323   3 
  23   1   1 78.5778 10.1594   3 
 -23   1  -1 69.9029 12.3207   2 
  22  -2  -1 -3.6958 6.53171   3 
 -22  -2   1 15.1410 8.76659   2 
  22   2  -1 -2.8431 6.38814   3 
 -22   2   1 7.50741 8.73619   2 
  20  -2  -1 21.2867 5.91493   3 
  20  -2  -1 18.6487 7.47417   2 
 -20  -2   1 35.4615 8.47503   2 
 -20  -2   1 16.7898 3.48649   4 
 -20  -2   1 18.6050 6.52824   3 
  20   2  -1 22.9266 7.88059   2 
 -20   2   1 15.2920 6.00880   3 
 -20   2   1 21.2397 6.96150   2 
 -20   2   1 17.2539 3.22849   4 
  20   2  -1 19.2755 5.75182   3 
 -18  -2   1 2.61927 2.25186   4 
  18  -2  -1 -0.0406 4.22018   3 
  18  -2  -1 14.8307 5.77100   2 
 -18  -2   1 4.14039 4.43277   3 
 -18   2   1 15.7467 5.51251   2 
 -18   2   1 3.47433 1.96690   4 
  18   2  -1 -0.2129 5.26129   2 
 -18   2   1 1.43671 4.37122   3 
 -16  -2   1 181.246 9.00216   3 
  16  -2  -1 174.410 9.42698   3 
  16  -2  -1 163.364 10.1631   2 
 -16  -2   1 175.802 6.19282   4 
 -16  -2   1 165.662 10.5155   2 
 -16   2   1 169.483 10.0354   2 
  16   2  -1 170.739 10.4173   2 
  16   2  -1 157.356 8.83332   3 
 -16   2   1 167.333 9.17496   3 
 -16   2   1 173.440 5.73547   4 
  14  -2  -1 222.695 10.1375   2 
 -14  -2   1 221.067 6.76558   4 
 -14  -2   1 218.234 10.5439   2 
 -14  -2   1 219.300 9.08442   3 
  14  -2  -1 216.090 9.49353   3 
  14   2  -1 216.770 10.3102   2 
 -14   2   1 220.363 6.35944   4 
 -14   2   1 214.824 10.2074   2 
 -14   2   1 238.434 9.45334   3 
  14   2  -1 216.240 9.27257   3 
  12  -2  -1 4.55637 2.59471   3 
  12  -2  -1 10.7572 3.17421   2 
 -12  -2   1 8.48546 2.60919   3 
 -12  -2   1 9.11061 3.00185   2 
 -12  -2   1 7.76139 1.41741   4 
 -12   2   1 8.72561 3.04125   2 
 -12   2   1 9.96244 1.26723   4 
 -12   2   1 7.98670 2.68143   3 
  12   2  -1 9.88187 3.26538   2 
  12   2  -1 7.01102 2.34442   3 
  10  -2  -1 82.2777 4.81291   3 
 -10  -2   1 77.7610 4.54451   3 
  10  -2  -1 77.9318 4.97845   2 
 -10  -2   1 78.0199 5.41153   2 
 -10  -2   1 78.4195 3.03553   4 
 -10   2   1 70.8502 4.96675   2 
  10   2  -1 80.8916 4.63119   3 
 -10   2   1 72.9068 4.50414   3 
  10   2  -1 88.5414 5.53334   2 
 -10   2   1 77.5126 2.66113   4 
   8  -2  -1 82.0403 4.28374   3 
  -8  -2   1 83.6918 4.13896   3 
   8  -2  -1 89.4395 4.45260   2 
  -8  -2   1 83.7887 4.86884   2 
  -8  -2   1 83.6957 2.85578   4 
   8   2  -1 88.1798 4.93311   2 
  -8   2   1 83.6688 4.18983   3 
   8   2  -1 85.0567 4.08762   3 
  -8   2   1 88.1743 4.58758   2 
  -8   2   1 87.0420 2.58526   4 
   6  -2  -1 1401.36 32.2835   2 
  -6  -2   1 1361.27 31.1448   4 
   6  -2  -1 1390.98 32.4964   3 
  -6  -2   1 1407.69 33.0905   2 
  -6  -2   1 1426.25 32.2260   3 
   6   2  -1 1415.78 33.0205   2 
  -6   2   1 1424.24 32.4890   2 
   6   2  -1 1379.76 32.2556   3 
  -6   2   1 1399.30 32.3699   3 
  -4  -2   1 279.715 8.10356   2 
  -4  -2   1 285.075 7.49410   3 
   4  -2  -1 283.431 7.43872   2 
  -4  -2   1 288.712 6.89774   4 
   4   2  -1 290.833 7.55140   3 
  -4   2   1 291.731 7.54084   2 
   2  -2  -1 187.902 4.62142   2 
  -2  -2   1 184.858 4.80744   3 
   2  -2  -1 190.227 4.69494   4 
  -2   2   1 186.292 4.70042   4 
   2   2  -1 192.641 4.85092   3 
  -2   2   1 188.946 4.64618   2 
   0  -2   1 590.631 12.8819   3 
   0  -2   1 580.577 13.6403   2 
   0  -2  -1 544.683 13.8199   3 
   0   2   1 604.315 13.4347   3 
   2  -2   1 175.751 4.36700   3 
  -2  -2  -1 171.480 4.44854   4 
  -2  -2  -1 174.937 4.64656   3 
   2  -2   1 160.753 4.39352   4 
  -2  -2  -1 172.065 4.79128   2 
   2   2   1 168.519 4.35909   4 
  -2   2  -1 174.401 4.89904   2 
  -2   2  -1 176.290 4.32663   3 
   2   2   1 170.488 4.70930   2 
  -2   2  -1 176.194 4.26910   4 
   4  -2   1 97.5065 3.30644   3 
  -4  -2  -1 100.206 3.90123   2 
   4  -2   1 92.9321 2.53122   4 
  -4  -2  -1 98.8688 3.04457   4 
  -4  -2  -1 103.677 3.46491   3 
   4   2   1 100.108 3.40978   3 
  -4   2  -1 97.4887 3.24555   3 
  -4   2  -1 95.0973 2.74936   4 
  -4   2  -1 92.9246 3.69363   2 
   4   2   1 101.509 2.88285   4 
   6  -2   1 26.5609 2.19163   3 
   6  -2   1 27.0745 1.10985   4 
  -6  -2  -1 23.5956 2.68374   2 
  -6  -2  -1 22.6533 2.17971   3 
  -6  -2  -1 20.6607 1.61508   4 
   6   2   1 19.3475 2.08766   3 
  -6   2  -1 24.3772 1.42150   4 
   6   2   1 22.4801 2.71313   2 
   6   2   1 22.8103 1.37662   4 
  -6   2  -1 26.5852 2.63573   2 
  -6   2  -1 23.5837 2.12902   3 
   8  -2   1 786.590 19.3989   3 
  -8  -2  -1 804.540 19.3806   3 
   8  -2   1 793.632 19.9913   2 
   8  -2   1 778.584 17.6428   4 
  -8  -2  -1 766.044 20.3388   2 
  -8  -2  -1 770.473 18.3264   4 
   8   2   1 781.152 19.3912   3 
   8   2   1 776.649 18.0292   4 
  -8   2  -1 794.827 18.0054   4 
  -8   2  -1 781.075 20.0864   2 
  -8   2  -1 778.458 19.1572   3 
   8   2   1 788.706 20.1564   2 
 -10  -2  -1 270.850 8.68162   3 
 -10  -2  -1 266.250 9.79180   2 
 -10  -2  -1 276.400 7.48580   4 
  10  -2   1 260.957 6.64282   4 
  10  -2   1 271.790 9.39225   2 
  10  -2   1 250.880 8.61682   3 
  10   2   1 264.869 7.00048   4 
 -10   2  -1 249.010 9.38029   2 
  10   2   1 270.587 8.78263   3 
 -10   2  -1 263.727 7.11008   4 
  10   2   1 275.163 9.57113   2 
 -10   2  -1 257.648 8.46389   3 
 -12  -2  -1 118.487 6.01930   3 
 -12  -2  -1 113.431 7.25302   2 
  12  -2   1 109.118 5.96046   3 
  12  -2   1 109.619 3.67327   4 
  12  -2   1 114.890 6.75157   2 
 -12  -2  -1 108.725 4.50777   4 
 -12   2  -1 114.081 6.81533   2 
 -12   2  -1 111.164 5.75972   3 
  12   2   1 117.768 5.94717   3 
  12   2   1 110.096 3.95235   4 
  14  -2   1 5.27464 3.66059   2 
 -14  -2  -1 8.57614 3.94349   2 
 -14  -2  -1 3.50214 1.84706   4 
  14  -2   1 3.58534 2.70089   3 
 -14  -2  -1 3.73823 2.97392   3 
  14   2   1 6.07341 1.49119   4 
  14   2   1 8.03400 3.18490   3 
 -14   2  -1 1.14192 2.69285   3 
 -14   2  -1 4.92333 1.75793   4 
  14   2   1 -1.1720 3.38071   2 
 -14   2  -1 3.47958 3.35988   2 
 -16  -2  -1 232.303 12.0584   2 
  16  -2   1 242.771 11.9508   2 
 -16  -2  -1 262.046 8.64283   4 
  16  -2   1 244.546 10.6862   3 
 -16  -2  -1 246.253 10.4891   3 
 -16   2  -1 245.054 10.3775   3 
  16   2   1 248.636 12.1161   2 
 -16   2  -1 237.617 7.99798   4 
  16   2   1 241.349 10.3973   3 
  16   2   1 243.325 7.73770   4 
 -16   2  -1 244.316 12.1253   2 
 -18  -2  -1 182.809 7.74833   4 
 -18  -2  -1 159.641 9.95889   3 
  18  -2   1 177.027 10.4379   3 
 -18  -2  -1 174.000 12.3260   2 
  18   2   1 166.401 12.0340   2 
 -18   2  -1 160.190 7.25344   4 
 -18   2  -1 149.719 12.1827   2 
 -18   2  -1 155.338 9.69680   3 
  18   2   1 165.927 11.3172   3 
 -20  -2  -1 91.5189 10.3406   2 
 -20  -2  -1 79.6195 8.29204   3 
 -20  -2  -1 87.5079 7.55517   4 
  20  -2   1 112.728 10.7811   3 
 -20   2  -1 85.8760 7.10110   4 
 -20   2  -1 83.2887 9.75762   2 
  20   2   1 79.1518 10.2821   2 
  20   2   1 116.659 10.4519   3 
 -20   2  -1 94.3790 9.98797   3 
  22  -2   1 -4.6949 6.72967   3 
 -22  -2  -1 -3.7511 8.40386   2 
  22   2   1 4.55755 6.59152   3 
 -22   2  -1 -0.6188 8.51108   2 
 -23  -3   1 77.7772 11.7579   2 
  23  -3  -1 83.0739 10.4476   3 
 -23   3   1 70.5113 11.6182   2 
  23   3  -1 93.7998 11.2250   3 
 -21  -3   1 99.3917 7.32009   4 
  21  -3  -1 115.971 11.9728   3 
 -21  -3   1 94.5015 11.6037   2 
  21  -3  -1 97.2753 11.3059   2 
  21   3  -1 111.561 11.4218   3 
  21   3  -1 98.2240 11.7384   2 
 -21   3   1 95.1981 10.9088   2 
 -21   3   1 133.297 11.9458   3 
 -19  -3   1 80.5085 9.24202   3 
  19  -3  -1 51.7867 6.86718   3 
 -19  -3   1 53.4779 5.26757   4 
  19  -3  -1 53.5486 8.09088   2 
 -19  -3   1 59.0458 8.17976   2 
  19   3  -1 49.7360 7.96136   2 
 -19   3   1 64.7851 7.44888   3 
 -19   3   1 69.0632 8.40202   2 
 -19   3   1 59.5527 4.68074   4 
  19   3  -1 71.5878 7.87854   3 
 -17  -3   1 44.3414 4.01077   4 
  17  -3  -1 49.7382 5.91652   3 
 -17  -3   1 36.8268 5.16100   3 
 -17  -3   1 38.5345 6.87343   2 
  17  -3  -1 54.2404 7.04662   2 
 -17   3   1 39.3966 5.45900   3 
 -17   3   1 43.9183 6.23179   2 
 -17   3   1 41.9138 3.45570   4 
  17   3  -1 46.7479 5.95775   3 
  17   3  -1 50.9840 7.06046   2 
 -15  -3   1 227.543 7.18752   4 
  15  -3  -1 225.318 10.0227   3 
 -15  -3   1 218.375 11.3189   2 
 -15  -3   1 223.345 9.60262   3 
  15  -3  -1 229.338 10.9265   2 
  15   3  -1 222.492 9.68839   3 
  15   3  -1 219.161 11.0037   2 
 -15   3   1 226.485 6.54522   4 
 -15   3   1 224.889 10.8240   2 
 -15   3   1 208.028 9.75866   3 
 -13  -3   1 155.715 7.31202   3 
 -13  -3   1 153.403 8.76073   2 
  13  -3  -1 142.618 7.49198   3 
  13  -3  -1 142.046 9.16951   2 
  13   3  -1 155.520 7.40144   3 
 -13   3   1 143.755 7.34487   3 
  13   3  -1 148.083 8.27079   2 
 -13   3   1 156.716 4.64883   4 
 -13   3   1 159.507 8.14742   2 
 -11  -3   1 488.034 11.8884   4 
  11  -3  -1 479.762 14.0913   3 
  11  -3  -1 466.957 14.0618   2 
 -11  -3   1 474.229 13.6213   3 
 -11  -3   1 480.508 15.1601   2 
  11   3  -1 493.990 13.9337   3 
  11   3  -1 447.088 14.4716   2 
 -11   3   1 497.957 11.3017   4 
 -11   3   1 461.111 13.6709   3 
 -11   3   1 462.564 14.2441   2 
  -9  -3   1 182.940 5.18158   4 
   9  -3  -1 172.246 6.89087   2 
  -9  -3   1 184.483 6.57642   3 
   9  -3  -1 177.859 6.84547   3 
  -9  -3   1 183.419 7.65953   2 
   9   3  -1 184.109 7.58212   2 
   9   3  -1 173.208 6.56472   3 
  -9   3   1 178.230 6.74171   3 
  -9   3   1 174.384 6.95659   2 
  -9   3   1 189.831 4.66343   4 
  -7  -3   1 42.4136 2.98097   3 
   7  -3  -1 50.1908 3.25935   3 
   7  -3  -1 45.6763 3.25133   2 
  -7  -3   1 51.0434 3.83898   2 
  -7  -3   1 46.3676 2.03598   4 
  -7   3   1 48.1136 1.65639   4 
  -7   3   1 53.5285 3.27257   2 
   7   3  -1 44.4150 2.92512   3 
   7   3  -1 45.2909 3.83242   2 
  -7   3   1 43.9916 3.12892   3 
   5  -3  -1 712.287 17.6963   3 
  -5  -3   1 721.868 17.3371   3 
  -5  -3   1 729.884 18.1931   2 
   5  -3  -1 734.977 17.3446   2 
  -5  -3   1 722.461 16.5235   4 
   5   3  -1 715.576 17.3726   3 
  -5   3   1 722.145 17.3579   2 
   5   3  -1 729.067 18.2196   2 
  -5   3   1 743.799 17.6973   3 
  -3  -3   1 337.666 8.92828   2 
   3  -3  -1 310.239 7.57729   4 
  -3  -3   1 320.017 7.64644   4 
  -3  -3   1 330.704 8.13767   3 
   3   3  -1 333.726 8.14005   3 
  -3   3   1 314.107 7.88695   2 
  -3   3   1 314.556 7.64196   4 
   1  -3  -1 1025.38 22.7300   3 
  -1  -3   1 1023.72 22.3179   3 
  -1   3   1 1006.82 22.0285   2 
   1   3  -1 1025.06 23.0077   2 
  -1   3   1 930.388 23.1863   3 
  -1   3   1 976.277 22.2174   4 
   1   3  -1 1000.58 22.2769   3 
  -1  -3  -1 915.048 20.5485   2 
   1  -3   1 904.164 20.2621   3 
  -1  -3  -1 937.155 20.7747   3 
  -1   3  -1 908.462 20.2505   3 
   1   3   1 903.559 20.7360   3 
   1   3   1 904.030 20.5028   2 
  -1   3  -1 917.868 20.9908   2 
   1   3   1 886.796 20.3345   4 
  -3   3  -1 6256.66 137.087   2 
  -5  -3  -1 356.955 8.60533   4 
   5  -3   1 343.923 7.81228   4 
  -5  -3  -1 348.576 9.18836   3 
  -5  -3  -1 340.261 9.77270   2 
   5  -3   1 341.433 9.02497   3 
  -5   3  -1 346.190 9.53257   2 
   5   3   1 342.980 9.13275   3 
  -5   3  -1 345.596 8.94883   3 
   5   3   1 348.546 9.68434   2 
  -5   3  -1 343.243 8.10384   4 
   5   3   1 339.969 8.36128   4 
  -7  -3  -1 193.514 5.66765   4 
   7  -3   1 207.689 6.50630   3 
   7  -3   1 200.800 4.84353   4 
  -7  -3  -1 197.586 7.32906   2 
  -7  -3  -1 210.695 6.53805   3 
  -7   3  -1 201.304 6.98752   2 
   7   3   1 201.631 6.48901   3 
  -7   3  -1 206.421 6.34124   3 
  -7   3  -1 200.481 5.21186   4 
   7   3   1 203.334 5.43137   4 
   7   3   1 189.353 7.09969   2 
   9  -3   1 153.502 3.99019   4 
  -9  -3  -1 156.216 5.95872   3 
   9  -3   1 149.039 5.93537   3 
  -9  -3  -1 155.078 6.98376   2 
  -9  -3  -1 150.380 4.93603   4 
  -9   3  -1 148.789 6.52041   2 
   9   3   1 153.587 4.53944   4 
  -9   3  -1 143.157 5.74048   3 
   9   3   1 158.496 6.76710   2 
  -9   3  -1 144.871 4.38986   4 
   9   3   1 150.899 5.92724   3 
  11  -3   1 868.706 20.1959   4 
 -11  -3  -1 899.042 21.1945   4 
 -11  -3  -1 880.202 22.5771   3 
  11  -3   1 879.012 22.6962   3 
 -11  -3  -1 882.209 23.9734   2 
 -11   3  -1 885.184 23.5467   2 
  11   3   1 868.437 22.6219   3 
 -11   3  -1 911.780 20.6604   4 
  11   3   1 897.258 20.7225   4 
 -11   3  -1 870.113 22.2597   3 
  11   3   1 913.326 23.7867   2 
 -13  -3  -1 151.511 8.26453   2 
 -13  -3  -1 138.455 5.45501   4 
 -13  -3  -1 137.996 6.97574   3 
  13  -3   1 136.686 7.02058   3 
  13   3   1 131.511 7.96461   2 
  13   3   1 143.465 4.88229   4 
 -13   3  -1 138.551 4.97258   4 
  13   3   1 141.256 6.97987   3 
 -13   3  -1 135.159 6.85166   3 
 -13   3  -1 144.170 8.00574   2 
 -15  -3  -1 -4.2565 3.07821   3 
  15  -3   1 0.89988 3.00849   3 
 -15  -3  -1 1.89572 3.80360   2 
 -15  -3  -1 -1.4009 1.93713   4 
  15   3   1 0.13605 1.30434   4 
 -15   3  -1 -2.3319 2.97914   3 
  15   3   1 -4.2211 2.60363   3 
 -15   3  -1 -1.7362 1.85419   4 
  15   3   1 -1.7790 3.84938   2 
 -15   3  -1 5.48681 3.73147   2 
 -17  -3  -1 -3.8594 4.53889   2 
 -17  -3  -1 1.55174 3.79252   3 
 -17  -3  -1 -0.5609 2.41995   4 
  17  -3   1 0.98889 3.70921   3 
 -17   3  -1 -3.1832 3.59933   3 
 -17   3  -1 0.13166 2.29179   4 
  17   3   1 7.47303 5.23997   2 
 -17   3  -1 -2.2477 4.53222   2 
  17   3   1 2.66185 3.56148   3 
  17   3   1 -1.1304 1.59007   4 
  19  -3   1 6.72738 5.10232   3 
 -19  -3  -1 -0.2426 4.75710   3 
 -19  -3  -1 -1.0548 3.18515   4 
 -19  -3  -1 1.38668 5.98814   2 
 -19   3  -1 7.41559 3.28315   4 
 -19   3  -1 2.31332 6.14681   2 
 -19   3  -1 6.38905 4.74104   3 
  19   3   1 2.13746 4.43809   3 
  19   3   1 1.04425 6.24843   2 
  21  -3   1 32.2796 7.57720   3 
 -21  -3  -1 9.74894 5.29743   4 
 -21  -3  -1 27.6844 7.05635   3 
 -21  -3  -1 17.8825 8.59920   2 
  21   3   1 27.0730 6.74213   3 
 -21   3  -1 10.2981 6.63254   3 
 -21   3  -1 18.9879 7.69138   2 
  23  -3   1 31.4388 8.29732   3 
 -23  -3  -1 23.0370 10.9204   2 
 -23   3  -1 28.6533 10.7133   2 
  23   3   1 18.6479 8.32140   3 
  22  -4  -1 92.8660 10.1705   3 
 -22  -4   1 103.943 12.8563   2 
 -22   4   1 92.7426 11.6920   2 
  22   4  -1 107.213 12.2662   3 
 -20  -4   1 26.2581 4.07987   4 
 -20  -4   1 30.9485 6.75563   3 
 -20  -4   1 25.4735 7.83144   2 
  20  -4  -1 37.3282 6.96414   3 
 -20   4   1 22.9575 6.45482   3 
  20   4  -1 31.4377 6.95257   3 
 -20   4   1 27.2854 3.47960   4 
 -20   4   1 23.5723 7.53306   2 
  20   4  -1 6.50843 7.27090   2 
 -18  -4   1 39.1969 5.80841   3 
  18  -4  -1 40.1529 6.89120   2 
 -18  -4   1 42.9301 4.44528   4 
  18  -4  -1 49.0916 6.61515   3 
 -18  -4   1 35.1780 7.40937   2 
 -18   4   1 42.7418 3.73719   4 
  18   4  -1 38.8419 5.87134   3 
 -18   4   1 43.8147 6.67642   2 
 -18   4   1 38.3307 5.89811   3 
  18   4  -1 49.8166 7.33327   2 
 -16  -4   1 451.818 15.0215   3 
 -16  -4   1 459.694 12.3436   4 
  16  -4  -1 449.647 15.4212   3 
  16  -4  -1 457.379 16.1288   2 
 -16  -4   1 436.803 17.1718   2 
  16   4  -1 444.188 15.2611   3 
 -16   4   1 449.688 15.1575   3 
 -16   4   1 440.479 16.2352   2 
 -16   4   1 441.970 11.4381   4 
  16   4  -1 443.171 16.4590   2 
 -14  -4   1 13.4394 4.40635   2 
 -14  -4   1 1.98921 2.88678   3 
  14  -4  -1 9.78965 3.72969   2 
  14  -4  -1 10.6051 3.34200   3 
 -14  -4   1 6.75849 1.71234   4 
  14   4  -1 7.92714 2.89616   3 
 -14   4   1 6.41616 3.46144   2 
 -14   4   1 8.94033 3.44583   3 
  14   4  -1 7.83640 3.94002   2 
 -14   4   1 9.90481 1.47508   4 
 -12  -4   1 558.845 13.7971   4 
  12  -4  -1 551.271 16.1237   3 
  12  -4  -1 566.713 16.4067   2 
 -12  -4   1 541.874 17.3512   2 
 -12   4   1 546.763 16.3644   2 
  12   4  -1 557.115 15.9469   3 
 -12   4   1 543.617 15.7862   3 
 -10  -4   1 170.402 5.23945   4 
  10  -4  -1 177.957 7.19754   2 
 -10  -4   1 157.413 6.56266   3 
  10  -4  -1 182.094 7.23990   3 
 -10  -4   1 164.935 7.94943   2 
  10   4  -1 173.686 7.90121   2 
  10   4  -1 168.033 6.76117   3 
 -10   4   1 174.732 6.97486   3 
 -10   4   1 177.967 4.52602   4 
 -10   4   1 172.650 7.06626   2 
  -8  -4   1 903.881 20.4145   4 
   8  -4  -1 879.896 21.8629   2 
   8  -4  -1 876.161 22.1695   3 
  -8  -4   1 879.317 21.6872   3 
  -8  -4   1 884.072 22.9282   2 
  -8   4   1 873.227 19.6937   4 
  -8   4   1 872.523 21.8981   2 
  -8   4   1 886.954 21.9589   3 
   8   4  -1 886.853 21.8341   3 
   8   4  -1 901.081 22.9281   2 
  -6  -4   1 901.602 20.6562   4 
  -6  -4   1 899.929 21.6589   3 
   6  -4  -1 896.669 21.6369   2 
  -6  -4   1 896.586 22.6831   2 
  -6   4   1 917.016 22.0242   3 
   6   4  -1 918.846 21.7523   3 
   6   4  -1 914.621 22.6904   2 
   6   4  -1 904.975 20.8964   4 
  -6   4   1 926.330 21.7096   2 
  -4  -4   1 4.54389 1.09768   4 
  -4  -4   1 3.70911 1.52918   2 
  -4  -4   1 2.96292 0.99815   3 
  -4   4   1 2.82190 0.80708   4 
  -4   4   1 3.73399 1.05262   2 
  -4   4   1 2.54270 1.27970   3 
   4   4  -1 4.99480 1.07897   3 
   4   4  -1 4.39794 1.54591   2 
   4   4  -1 5.65271 0.87044   4 
  -2  -4   1 277.820 6.94977   3 
   2  -4  -1 272.085 7.30443   3 
   2  -4  -1 270.403 6.60942   4 
  -2  -4   1 278.863 7.75967   2 
   2   4  -1 268.817 6.88943   3 
   2   4  -1 275.211 7.70761   2 
  -2   4   1 265.123 6.62704   2 
  -2   4   1 267.692 6.48732   4 
  -2   4   1 259.859 7.22865   3 
   0   4  -1 4572.32 100.594   2 
   2  -4   1 15.8129 1.08396   4 
  -2  -4  -1 16.5949 1.78778   2 
  -2  -4  -1 13.8360 1.28035   4 
  -2  -4  -1 17.5958 1.66432   3 
   2  -4   1 14.3090 1.56069   2 
   2   4   1 15.1934 1.18101   4 
   2   4   1 15.2037 1.56714   3 
  -2   4  -1 16.9608 1.45044   3 
   2   4   1 15.8795 1.58986   2 
  -2   4  -1 14.9943 1.70816   2 
  -4  -4  -1 172.604 4.77149   4 
  -4  -4  -1 165.867 5.72099   2 
   4   4   1 179.536 4.61109   4 
   4   4   1 168.825 5.73371   2 
  -4   4  -1 164.552 5.55486   2 
  -4   4  -1 165.498 4.16772   4 
   4   4   1 166.715 5.21446   3 
  -4   4  -1 166.331 5.03247   3 
   6  -4   1 398.392 8.81830   4 
  -6  -4  -1 398.440 10.6197   3 
   6  -4   1 397.630 10.5193   3 
  -6  -4  -1 404.340 11.4247   2 
  -6  -4  -1 378.490 9.80421   4 
  -6   4  -1 389.520 10.9481   2 
   6   4   1 387.882 10.5394   3 
  -6   4  -1 398.422 9.19067   4 
   6   4   1 385.896 11.1500   2 
   6   4   1 392.696 9.59539   4 
  -6   4  -1 398.740 10.3675   3 
  -8  -4  -1 391.765 10.1308   4 
  -8  -4  -1 385.699 12.0299   2 
   8  -4   1 396.416 9.04705   4 
  -8  -4  -1 393.819 11.1164   3 
   8  -4   1 387.014 11.0929   3 
  -8   4  -1 390.897 10.9271   3 
   8   4   1 410.486 9.86697   4 
  -8   4  -1 397.338 11.6707   2 
   8   4   1 396.860 11.1281   3 
  -8   4  -1 400.161 9.46531   4 
   8   4   1 394.743 11.9049   2 
 -10  -4  -1 1113.17 27.0070   3 
  10  -4   1 1089.61 24.5604   4 
  10  -4   1 1096.89 27.0981   3 
 -10  -4  -1 1070.14 25.6771   4 
 -10  -4  -1 1088.62 28.3065   2 
  10   4   1 1129.36 28.1443   2 
 -10   4  -1 1117.73 27.7870   2 
  10   4   1 1102.11 25.2646   4 
 -10   4  -1 1119.98 24.9818   4 
 -10   4  -1 1087.92 26.6585   3 
  10   4   1 1066.84 26.9556   3 
  12  -4   1 2.77114 2.19860   3 
 -12  -4  -1 -0.0683 1.46541   4 
 -12  -4  -1 6.43325 3.17895   2 
  12   4   1 1.82913 2.24441   3 
 -12   4  -1 -2.8513 2.54479   2 
 -12   4  -1 -0.7409 2.20664   3 
  12   4   1 1.26469 1.09976   4 
  12   4   1 2.89433 3.04730   2 
 -12   4  -1 0.61456 1.39032   4 
 -14  -4  -1 619.327 19.6338   2 
 -14  -4  -1 597.207 17.7247   3 
  14  -4   1 615.224 18.1311   3 
 -14  -4  -1 620.176 16.0692   4 
  14   4   1 627.291 19.2200   2 
  14   4   1 611.523 15.4384   4 
 -14   4  -1 613.683 15.3010   4 
 -14   4  -1 620.164 19.1045   2 
  14   4   1 602.471 17.9511   3 
 -14   4  -1 634.576 17.6174   3 
  16  -4   1 36.2290 5.00514   3 
 -16  -4  -1 23.2800 4.72664   3 
 -16  -4  -1 27.1139 3.47131   4 
 -16  -4  -1 38.0462 6.14452   2 
 -16   4  -1 25.2046 4.46357   3 
  16   4   1 23.1302 4.63638   3 
 -16   4  -1 24.3546 5.35215   2 
  16   4   1 29.2648 3.22599   4 
  16   4   1 24.0722 5.22874   2 
 -16   4  -1 26.3865 2.91846   4 
  18  -4   1 55.8981 6.93142   3 
 -18  -4  -1 47.8056 5.71471   4 
 -18  -4  -1 45.9374 7.86599   2 
 -18  -4  -1 44.6297 6.11769   3 
  18   4   1 40.8611 5.69498   3 
  18   4   1 46.5807 7.50387   2 
 -18   4  -1 44.9773 5.03409   4 
 -18   4  -1 45.8369 6.20733   3 
 -18   4  -1 50.0945 8.02587   2 
 -20  -4  -1 27.7816 6.81377   3 
  20  -4   1 39.3200 6.73295   3 
 -20  -4  -1 30.7758 8.97960   2 
 -20  -4  -1 35.7005 5.22553   4 
 -20   4  -1 30.7164 8.25660   2 
  20   4   1 31.4414 6.44422   3 
 -20   4  -1 33.4981 6.68359   3 
  20   4   1 41.2983 9.20952   2 
 -20   4  -1 35.5519 4.50577   4 
  22  -4   1 53.4722 8.82389   3 
 -22  -4  -1 45.2515 10.7736   2 
  22   4   1 55.1743 8.63667   3 
 -22   4  -1 50.7929 10.4319   2 
  23  -5  -1 10.2066 8.10532   3 
 -23  -5   1 12.6204 10.1592   2 
  23   5  -1 0.86998 7.16606   3 
 -23   5   1 19.8095 9.88546   2 
 -21  -5   1 7.05192 3.89573   4 
  21  -5  -1 -3.2809 6.47574   3 
 -21  -5   1 3.84262 7.78139   2 
 -21   5   1 8.50025 7.42343   2 
 -21   5   1 -0.4300 6.56399   3 
  21   5  -1 8.33490 5.86607   3 
 -19  -5   1 -0.0854 2.74803   4 
 -19  -5   1 -0.9366 6.38315   2 
 -19  -5   1 2.48987 5.21260   3 
  19  -5  -1 1.89556 5.01331   3 
  19   5  -1 7.29684 6.73700   2 
 -19   5   1 -0.8379 5.03704   3 
 -19   5   1 1.76421 2.48419   4 
 -19   5   1 -4.7540 5.50567   2 
  19   5  -1 3.63854 4.61172   3 
 -17  -5   1 5.82580 4.20003   3 
 -17  -5   1 -0.1239 2.08415   4 
 -17  -5   1 3.07509 5.07402   2 
  17  -5  -1 -3.2594 3.74624   3 
 -17   5   1 0.61372 1.63480   4 
  17   5  -1 3.48813 5.22348   2 
 -17   5   1 4.76881 4.42813   3 
 -17   5   1 6.81803 4.71884   2 
  17   5  -1 3.65593 3.90817   3 
  15  -5  -1 19.3206 4.11886   3 
 -15  -5   1 16.9221 2.48526   4 
 -15  -5   1 26.2521 5.25369   2 
 -15  -5   1 18.0548 4.03860   3 
  15   5  -1 14.5546 3.49535   3 
 -15   5   1 16.8924 4.01796   3 
  15   5  -1 21.5451 5.22925   2 
 -15   5   1 20.0977 2.29178   4 
 -15   5   1 16.6852 4.26170   2 
  13  -5  -1 56.4326 5.70854   3 
 -13  -5   1 43.0033 5.40056   2 
 -13  -5   1 37.7188 4.53695   4 
 -13  -5   1 45.7375 5.08850   3 
  13   5  -1 53.7105 6.02942   2 
 -13   5   1 50.7060 5.54903   2 
  13   5  -1 42.4932 4.74133   3 
 -13   5   1 52.0715 5.40290   3 
 -13   5   1 43.4314 2.28237   4 
  11  -5  -1 89.2469 5.71634   3 
 -11  -5   1 89.6163 5.37538   3 
 -11  -5   1 92.5228 3.82486   4 
 -11  -5   1 86.0341 6.56522   2 
 -11   5   1 98.3725 5.83742   2 
 -11   5   1 93.9405 5.61533   3 
  11   5  -1 94.4441 6.61712   2 
 -11   5   1 93.6820 2.88281   4 
  11   5  -1 97.7057 5.34510   3 
  -9  -5   1 10.6899 2.13147   3 
   9  -5  -1 13.9662 2.66094   3 
  -9  -5   1 12.6273 2.86174   2 
  -9  -5   1 13.5205 1.58109   4 
  -9   5   1 13.1364 1.00846   4 
   9   5  -1 12.6747 2.87495   2 
   9   5  -1 12.4320 2.16379   3 
  -9   5   1 14.7844 2.58666   3 
  -9   5   1 9.20028 2.18337   2 
   9   5  -1 10.5484 1.47112   4 
  -7  -5   1 124.319 4.96464   3 
  -7  -5   1 122.880 3.90208   4 
  -7  -5   1 126.521 6.00425   2 
  -7   5   1 125.632 3.70881   4 
   7   5  -1 123.395 4.09301   4 
   7   5  -1 124.906 4.93202   3 
  -7   5   1 126.476 5.31526   3 
   7   5  -1 113.448 5.82354   2 
  -7   5   1 119.732 4.86758   2 
  -5  -5   1 789.390 18.1071   4 
  -5  -5   1 803.431 20.0929   2 
  -5  -5   1 799.742 19.0261   3 
   5   5  -1 791.021 19.9731   2 
   5   5  -1 793.497 19.0487   3 
   5   5  -1 772.672 18.2905   4 
  -5   5   1 805.503 19.5145   3 
  -5   5   1 789.131 18.8212   2 
  -5   5   1 778.546 17.8207   4 
   3  -5  -1 8275.99 205.481   1 
   3  -5  -1 7785.87 196.071   1 
   1  -5  -1 89.0800 2.84353   4 
  -1  -5   1 97.7438 3.19064   3 
   1  -5  -1 86.5190 3.47773   3 
  -1  -5   1 91.4838 3.79377   2 
   1  -5  -1 93.2213 2.99931   2 
   1   5  -1 95.0266 3.10078   3 
  -1   5   1 87.9882 3.45365   3 
  -1   5   1 87.5701 2.66015   4 
   1   5  -1 95.1541 3.94393   2 
  -1   5   1 91.9440 3.01643   2 
   1  -5   1 1055.33 22.6970   3 
  -1  -5  -1 844.870 23.2784   2 
   1  -5   1 1066.23 23.4612   2 
  -1  -5  -1 1036.74 23.1755   3 
   1  -5   1 1009.28 21.9985   4 
  -1  -5  -1 940.366 22.8826   4 
  -1   5  -1 1065.11 23.4885   2 
   1   5   1 995.939 23.0682   3 
  -1   5  -1 978.420 23.1211   3 
   1   5   1 1007.28 22.8638   2 
   1   5   1 956.127 22.3005   4 
  -3  -5  -1 223.251 6.54464   3 
  -3  -5  -1 226.824 6.76354   2 
   3  -5   1 231.246 6.72591   2 
  -3  -5  -1 227.918 5.97547   4 
   3  -5   1 227.260 5.40151   4 
  -3   5  -1 225.829 6.86831   2 
   3   5   1 224.602 6.74709   2 
   3   5   1 223.409 6.49943   3 
   3   5   1 211.125 5.82291   4 
  -3   5  -1 229.235 6.20255   3 
  -5  -5  -1 79.0433 3.03443   4 
  -5  -5  -1 81.1449 4.24183   2 
  -5  -5  -1 77.9095 3.62509   3 
   5   5   1 83.6305 2.82898   4 
   5   5   1 82.8610 3.57626   3 
  -5   5  -1 79.8421 4.00857   2 
  -5   5  -1 81.4218 3.53745   3 
   5   5   1 82.6534 4.23044   2 
   7  -5   1 31.4566 2.93769   3 
  -7  -5  -1 33.1485 2.97595   3 
  -7  -5  -1 35.3437 2.27241   4 
   7  -5   1 37.4545 1.11532   4 
  -7  -5  -1 40.2895 3.69036   2 
  -7   5  -1 35.3140 1.62795   4 
   7   5   1 34.3978 1.99299   4 
   7   5   1 35.8653 3.66875   2 
   7   5   1 35.7804 2.90002   3 
  -7   5  -1 36.6985 2.89268   3 
  -7   5  -1 30.6534 3.23289   2 
  -9  -5  -1 31.4431 2.61489   4 
  -9  -5  -1 34.9415 3.53551   3 
   9  -5   1 31.6004 3.47134   3 
  -9  -5  -1 28.6815 3.47057   2 
   9   5   1 33.0723 3.33500   3 
  -9   5  -1 40.0562 3.52853   3 
   9   5   1 27.4049 3.36429   2 
  -9   5  -1 34.8653 3.73738   2 
   9   5   1 30.3283 2.07814   4 
  -9   5  -1 31.3282 1.91996   4 
 -11  -5  -1 10.0997 3.42135   2 
 -11  -5  -1 10.3863 2.57875   3 
 -11  -5  -1 9.15371 1.91069   4 
  11  -5   1 10.0143 2.52561   3 
  11   5   1 10.3374 1.54445   4 
 -11   5  -1 8.22709 1.44579   4 
 -11   5  -1 11.8515 2.62482   3 
 -11   5  -1 10.6234 2.85698   2 
  11   5   1 10.2413 2.36067   3 
  11   5   1 9.97233 3.29533   2 
 -13  -5  -1 3.65231 3.13101   2 
 -13  -5  -1 6.34084 1.99377   4 
  13  -5   1 4.37371 2.90919   3 
 -13  -5  -1 3.90576 2.76788   3 
 -13   5  -1 4.51976 1.64031   4 
  13   5   1 4.95080 3.48585   2 
 -13   5  -1 5.57247 2.82067   3 
 -13   5  -1 5.00079 3.31855   2 
  13   5   1 4.86311 2.40994   3 
  13   5   1 5.16885 1.36405   4 
  15  -5   1 226.752 9.89412   3 
 -15  -5  -1 215.698 9.74271   3 
 -15  -5  -1 212.935 7.85280   4 
 -15  -5  -1 203.617 11.3463   2 
  15   5   1 198.301 10.9386   2 
 -15   5  -1 212.557 6.95593   4 
 -15   5  -1 210.725 9.40824   3 
  15   5   1 220.748 7.14816   4 
  15   5   1 222.819 9.65737   3 
 -15   5  -1 218.151 10.7500   2 
 -17  -5  -1 23.3540 8.39431   2 
 -17  -5  -1 18.8790 4.96077   3 
 -17  -5  -1 21.8957 3.54845   4 
  17  -5   1 23.0425 4.68749   3 
 -17   5  -1 23.5858 3.06213   4 
  17   5   1 25.3035 4.90407   3 
  17   5   1 18.9999 5.76440   2 
  17   5   1 24.0683 2.96513   4 
 -17   5  -1 22.9415 4.97541   3 
 -17   5  -1 25.2098 5.97006   2 
 -19  -5  -1 12.8377 5.90698   3 
 -19  -5  -1 11.9822 4.13736   4 
 -19  -5  -1 10.9365 6.82419   2 
  19  -5   1 20.4408 6.08605   3 
 -19   5  -1 19.0295 3.69763   4 
 -19   5  -1 20.4174 6.81659   2 
  19   5   1 19.1637 5.86482   3 
  19   5   1 23.4087 7.45411   2 
 -19   5  -1 20.6860 5.35652   3 
 -21  -5  -1 -4.4738 5.04929   4 
  21  -5   1 -5.9508 6.36261   3 
 -21  -5  -1 0.39455 7.71575   2 
 -21   5  -1 4.25960 6.67160   3 
 -21   5  -1 9.86963 7.79798   2 
  21   5   1 -0.8108 5.55671   3 
 -23  -5  -1 32.2727 11.1776   2 
  23  -5   1 18.2111 8.76052   3 
  23   5   1 34.8606 8.56431   3 
 -23   5  -1 30.3019 10.3276   2 
  22  -6  -1 124.424 14.6046   3 
 -22  -6   1 123.890 13.3496   2 
 -22   6   1 126.340 14.9058   2 
  22   6  -1 127.305 13.3699   3 
 -20  -6   1 75.6633 9.71800   2 
 -20  -6   1 73.9042 8.42431   3 
 -20  -6   1 85.8815 7.00812   4 
  20  -6  -1 73.5686 8.32680   3 
  20   6  -1 65.4585 10.3039   2 
 -20   6   1 76.0120 5.53545   4 
 -20   6   1 67.9666 9.07122   2 
 -20   6   1 68.2048 8.23356   3 
  20   6  -1 68.8132 8.03981   3 
 -18  -6   1 12.7834 2.98688   4 
 -18  -6   1 16.5927 6.40831   2 
 -18  -6   1 14.0659 5.19321   3 
  18   6  -1 17.8754 4.49018   3 
  18   6  -1 22.8690 6.88675   2 
 -18   6   1 14.6307 5.65736   2 
 -18   6   1 18.6112 5.39761   3 
 -16  -6   1 42.3906 5.65249   3 
 -16  -6   1 39.2986 4.13938   4 
 -16  -6   1 49.5388 7.24962   2 
  16  -6  -1 37.9522 5.44810   3 
  16   6  -1 46.2763 6.95003   2 
 -16   6   1 50.8991 6.39263   2 
 -16   6   1 44.8637 2.99915   4 
  16   6  -1 56.2252 6.62072   3 
 -16   6   1 48.2479 5.75156   3 
 -14  -6   1 495.648 15.6505   3 
  14  -6  -1 507.950 16.4064   3 
 -14  -6   1 493.754 17.5997   2 
 -14  -6   1 530.801 13.5644   4 
 -14   6   1 517.292 15.9181   3 
 -14   6   1 516.260 12.2058   4 
 -14   6   1 523.121 16.6410   2 
  14   6  -1 500.749 17.0191   2 
  14   6  -1 502.098 15.8313   3 
 -12  -6   1 118.704 6.38301   3 
  12  -6  -1 112.201 6.80577   3 
 -12  -6   1 128.773 7.85507   2 
 -12  -6   1 120.336 4.58921   4 
 -12   6   1 121.140 6.78812   2 
 -12   6   1 110.528 6.87174   3 
 -12   6   1 106.008 3.73476   4 
  12   6  -1 112.861 7.76182   2 
  12   6  -1 110.205 6.11726   3 
 -10  -6   1 826.451 23.1750   2 
 -10  -6   1 850.587 21.7140   3 
 -10  -6   1 844.078 20.0666   4 
 -10   6   1 874.610 18.9337   4 
 -10   6   1 855.316 22.0119   3 
 -10   6   1 851.978 22.0362   2 
  10   6  -1 838.647 21.8176   3 
  10   6  -1 840.051 23.0627   2 
  -8  -6   1 1000.45 25.8931   2 
  -8  -6   1 996.097 24.4501   3 
  -8  -6   1 994.987 23.0830   4 
  -8   6   1 1009.88 24.4710   2 
   8   6  -1 956.982 23.2967   4 
   8   6  -1 1019.77 25.8250   2 
   8   6  -1 1015.67 24.5502   3 
  -8   6   1 993.800 22.0669   4 
  -8   6   1 996.175 22.6065   4 
  -8   6   1 1022.77 24.8770   3 
  -6  -6   1 974.419 23.5505   3 
  -6  -6   1 986.211 22.4676   4 
  -6  -6   1 987.665 24.7702   2 
  -6   6   1 984.925 23.3871   2 
  -6   6   1 984.311 21.9495   4 
   6   6  -1 978.613 24.6995   2 
  -6   6   1 1022.94 24.1314   3 
   6   6  -1 929.720 22.6048   4 
   6   6  -1 990.737 23.5929   3 
   4  -6  -1 385.864 9.12148   4 
  -4  -6   1 393.521 9.35401   4 
  -4  -6   1 389.708 10.2160   3 
  -4  -6   1 393.414 11.2282   2 
  -4   6   1 389.420 8.98161   4 
  -4   6   1 384.836 9.95419   2 
   4   6  -1 389.789 10.1733   3 
  -4   6   1 384.680 10.5554   3 
   4   6  -1 381.472 9.64163   4 
   4   6  -1 381.271 11.1728   2 
  -2  -6   1 2233.20 50.5347   4 
   2  -6  -1 2278.94 51.7080   3 
  -2  -6   1 2318.55 52.1675   2 
   2  -6  -1 2307.18 50.6984   4 
  -2  -6   1 2310.56 51.3252   3 
  -2   6   1 2321.06 51.7158   3 
   2   6  -1 2363.22 52.2033   2 
  -2   6   1 2331.20 51.0787   2 
   2   6  -1 2344.86 51.2799   3 
  -2   6   1 2230.00 50.4213   4 
   2   6  -1 2255.77 50.7183   4 
   0  -6   1 147.985 3.79262   4 
   0  -6   1 154.476 4.58322   3 
   0  -6   1 148.748 5.27439   2 
   0  -6  -1 154.542 5.02663   3 
   0   6   1 153.354 4.90333   3 
   0   6  -1 143.939 5.23896   2 
   0   6   1 144.470 3.97916   4 
   0   6  -1 153.836 4.50530   3 
   0   6   1 148.919 4.58124   2 
   2  -6   1 10.9469 1.68319   2 
   2  -6   1 16.0052 1.75502   3 
  -2  -6  -1 12.5470 1.69270   2 
  -2  -6  -1 9.01669 1.56006   3 
  -2  -6  -1 14.4900 1.43190   4 
  -2   6  -1 14.3148 1.49558   3 
   2   6   1 12.6952 1.62038   3 
   2   6   1 13.5068 1.22842   4 
  -2   6  -1 12.2059 1.95554   2 
   2   6   1 13.1545 1.73226   2 
  -4  -6  -1 326.852 9.57942   2 
  -4  -6  -1 331.651 9.22853   3 
  -4  -6  -1 331.877 8.46792   4 
   4   6   1 321.314 8.19427   4 
  -4   6  -1 345.719 9.55731   2 
   4   6   1 328.274 9.58234   2 
  -4   6  -1 325.845 8.80377   3 
   4   6   1 331.508 9.15124   3 
  -6  -6  -1 570.966 14.0836   4 
  -6  -6  -1 579.558 15.7857   2 
  -6  -6  -1 586.383 15.0603   3 
  -6   6  -1 576.908 15.2917   2 
   6   6   1 578.072 14.9253   3 
  -6   6  -1 582.434 14.7527   3 
   6   6   1 584.102 15.6882   2 
  -8  -6  -1 859.198 20.5717   4 
  -8  -6  -1 864.423 21.7353   3 
  -8  -6  -1 867.532 22.8295   2 
  -8   6  -1 906.286 22.2765   2 
   8   6   1 866.326 21.6470   3 
   8   6   1 853.141 20.1970   4 
   8   6   1 870.890 22.4622   2 
  -8   6  -1 857.890 19.4349   4 
  -8   6  -1 852.282 21.3351   3 
 -10  -6  -1 455.953 14.6660   2 
 -10  -6  -1 464.945 13.2247   3 
 -10  -6  -1 441.774 11.8816   4 
  10  -6   1 440.833 13.1543   3 
  10   6   1 454.040 13.1368   3 
 -10   6  -1 437.713 10.7337   4 
  10   6   1 467.182 14.2448   2 
  10   6   1 453.179 11.4043   4 
 -10   6  -1 445.861 12.8473   3 
 -10   6  -1 436.137 13.5945   2 
 -12  -6  -1 1156.59 31.2035   2 
  12  -6   1 1153.93 29.4519   3 
 -12  -6  -1 1201.16 27.7811   4 
 -12  -6  -1 1173.90 29.3355   3 
 -12   6  -1 1155.73 26.5422   4 
 -12   6  -1 1169.31 28.8751   3 
  12   6   1 1127.19 29.2282   3 
 -12   6  -1 1151.71 30.0722   2 
  12   6   1 1160.84 27.1349   4 
  12   6   1 1175.16 30.6320   2 
  14  -6   1 26.3529 4.33449   3 
 -14  -6  -1 20.4197 4.01316   3 
 -14  -6  -1 18.6266 4.80758   2 
 -14  -6  -1 21.4872 2.96699   4 
 -14   6  -1 14.9303 4.14961   2 
  14   6   1 18.1627 3.47216   3 
  14   6   1 20.7424 2.38581   4 
  14   6   1 15.3274 4.70895   2 
 -14   6  -1 14.4372 3.73637   3 
 -14   6  -1 21.5181 2.34965   4 
 -16  -6  -1 26.4630 3.48910   4 
 -16  -6  -1 28.1047 4.98057   3 
  16  -6   1 30.7054 4.92352   3 
 -16  -6  -1 25.1716 5.84844   2 
  16   6   1 24.2763 4.54705   3 
 -16   6  -1 34.4755 6.15518   2 
  16   6   1 20.1571 2.57905   4 
 -16   6  -1 32.5122 4.95169   3 
  16   6   1 23.6497 5.68225   2 
 -16   6  -1 26.8045 2.99140   4 
 -18  -6  -1 19.4492 5.46973   3 
 -18  -6  -1 26.1205 4.08986   4 
 -18  -6  -1 26.0060 7.21905   2 
  18  -6   1 22.2856 5.57929   3 
  18   6   1 16.8635 6.44141   2 
 -18   6  -1 16.4818 5.25022   3 
 -18   6  -1 21.0275 3.28633   4 
  18   6   1 7.68847 4.58616   3 
 -18   6  -1 12.3106 6.06999   2 
  18   6   1 17.9040 2.92285   4 
 -20  -6  -1 83.5242 8.41595   4 
  20  -6   1 80.9656 8.93839   3 
 -20  -6  -1 78.2114 8.50883   3 
 -20  -6  -1 79.1580 10.7344   2 
 -20   6  -1 83.9921 9.79353   2 
  20   6   1 91.1056 10.7000   3 
 -20   6  -1 85.9592 6.70513   4 
  20   6   1 66.8130 9.81932   2 
 -20   6  -1 79.6886 8.23540   3 
  22  -6   1 32.8344 8.65649   3 
 -22  -6  -1 20.9518 9.76291   2 
  22   6   1 39.5234 7.98036   3 
 -22   6  -1 28.2809 9.68360   2 
 -23  -7   1 21.0164 10.9837   2 
 -23   7   1 5.88335 8.88866   2 
  23   7  -1 5.89001 7.52949   3 
 -21  -7   1 48.4650 5.63554   4 
 -21  -7   1 59.6649 10.4453   2 
 -21   7   1 34.0586 8.62511   2 
  21   7  -1 55.5124 8.33086   3 
 -21   7   1 51.1963 8.16434   3 
 -19  -7   1 8.11089 3.29169   4 
 -19  -7   1 3.25556 6.67529   2 
 -19  -7   1 -0.9070 5.71137   3 
 -19   7   1 -1.1043 5.76197   2 
 -19   7   1 4.89859 2.67460   4 
 -19   7   1 3.61232 5.80786   3 
  19   7  -1 3.16329 7.63787   2 
  19   7  -1 2.35201 4.76523   3 
 -17  -7   1 20.6357 7.24422   2 
 -17  -7   1 0.32786 4.30319   3 
 -17  -7   1 10.5536 2.63850   4 
  17   7  -1 9.94426 5.70427   2 
 -17   7   1 11.9168 2.09410   4 
  17   7  -1 14.0165 4.34031   3 
 -17   7   1 14.4838 5.13748   3 
 -17   7   1 13.8735 5.04635   2 
 -15  -7   1 2.04713 3.36536   3 
 -15  -7   1 3.47919 4.40602   2 
 -15  -7   1 1.97317 2.03160   4 
 -15   7   1 2.74030 3.69148   3 
 -15   7   1 0.63629 4.06905   2 
  15   7  -1 -1.3821 2.94939   3 
 -15   7   1 1.82706 1.35115   4 
  15   7  -1 3.34059 4.09509   2 
 -13  -7   1 14.0915 4.17010   2 
 -13  -7   1 6.15558 1.96802   4 
 -13  -7   1 10.3401 3.46750   3 
 -13   7   1 0.92133 3.18158   3 
  13   7  -1 7.38717 3.99081   2 
  13   7  -1 7.24283 2.96868   3 
 -13   7   1 8.76264 3.49036   2 
 -13   7   1 8.37759 1.18280   4 
 -11  -7   1 238.725 7.01607   4 
 -11  -7   1 233.184 10.3440   2 
 -11   7   1 223.424 6.40335   4 
  11   7  -1 223.982 8.58335   3 
 -11   7   1 235.873 5.61026   4 
 -11   7   1 232.341 9.03338   3 
 -11   7   1 224.346 8.92931   2 
  -9  -7   1 249.209 9.90912   2 
  -9  -7   1 254.417 8.59958   3 
  -9  -7   1 251.867 7.17630   4 
  -9   7   1 253.464 9.01210   3 
  -9   7   1 249.414 6.48388   4 
  -9   7   1 251.852 8.51191   2 
   9   7  -1 252.812 9.88764   2 
  -9   7   1 262.311 5.85236   4 
   9   7  -1 248.110 8.50607   3 
  -7  -7   1 9.86551 2.63967   2 
  -7  -7   1 11.1281 2.00778   3 
  -7  -7   1 10.5562 1.25401   4 
  -7   7   1 9.45922 1.99002   2 
   7   7  -1 10.5611 2.66043   2 
  -7   7   1 9.50998 2.41524   3 
   7   7  -1 12.7251 1.56124   4 
   7   7  -1 12.0555 2.05347   3 
  -5  -7   1 998.084 25.0198   2 
  -5  -7   1 1018.65 22.7404   4 
   5  -7  -1 999.476 22.1544   4 
  -5  -7   1 993.081 23.8063   3 
  -5   7   1 989.988 22.0550   4 
  -5   7   1 974.708 24.0896   3 
   5   7  -1 966.084 22.8791   4 
   5   7  -1 1009.58 24.8625   2 
   5   7  -1 1003.35 23.7433   3 
  -5   7   1 992.577 23.5119   2 
  -3  -7   1 263.060 7.58929   3 
  -3  -7   1 271.322 6.71840   4 
   3  -7  -1 264.861 6.72547   4 
   3  -7  -1 260.550 7.19886   2 
   3  -7  -1 256.961 7.89083   3 
  -3  -7   1 265.866 8.53125   2 
  -3   7   1 264.082 6.37193   4 
  -3   7   1 270.607 7.95663   3 
   3   7  -1 266.479 6.89792   4 
  -3   7   1 269.640 7.45240   2 
   3   7  -1 269.794 8.55367   2 
   3   7  -1 266.949 7.49582   3 
  -1  -7   1 294.581 8.73131   2 
   1  -7  -1 288.251 7.74614   2 
   1  -7  -1 282.672 7.32597   4 
  -1  -7   1 295.357 7.94540   3 
   1  -7  -1 291.107 8.35251   3 
  -1   7   1 281.641 7.76910   2 
   1   7  -1 293.135 8.76791   2 
   1   7  -1 298.853 7.23818   4 
  -1   7   1 288.469 7.03155   4 
   1   7  -1 292.883 7.82592   3 
  -1   7   1 288.575 8.25953   3 
   1  -7   1 804.842 19.5829   2 
   1  -7   1 804.013 18.8724   3 
  -1  -7  -1 796.048 19.0752   2 
  -1  -7  -1 813.384 19.4120   3 
   1  -7   1 765.379 17.8190   4 
   1   7   1 803.062 19.2764   3 
   1   7   1 765.754 18.1468   4 
   1   7   1 808.958 19.1224   2 
  -1   7  -1 811.239 19.7005   2 
  -1   7  -1 817.684 18.8459   3 
  -3  -7  -1 130.433 4.99985   3 
   3  -7   1 135.587 3.24114   4 
  -3  -7  -1 133.372 5.18595   2 
   3  -7   1 127.660 5.05952   2 
  -3  -7  -1 132.165 4.20829   4 
   3   7   1 139.188 5.24938   2 
  -3   7  -1 129.604 5.28508   2 
   3   7   1 133.170 4.83466   3 
  -3   7  -1 133.607 4.55490   3 
   3   7   1 133.229 3.95202   4 
  -5  -7  -1 29.5221 2.96068   3 
  -5  -7  -1 39.9711 3.52042   2 
  -5   7  -1 34.5820 3.53712   2 
   5   7   1 33.8005 3.59400   2 
  -5   7  -1 36.9502 2.95586   3 
   5   7   1 36.3056 2.01903   4 
   5   7   1 36.8996 2.76281   3 
  -5   7  -1 37.9648 2.72787   3 
  -7  -7  -1 73.8174 5.05808   2 
  -7  -7  -1 72.9492 3.43716   4 
  -7   7  -1 79.1126 4.25961   3 
   7   7   1 72.4780 3.04717   4 
  -7   7  -1 81.1906 4.89231   2 
   7   7   1 89.9030 4.34676   3 
   7   7   1 80.3924 5.17055   2 
  -9  -7  -1 3.67228 2.61578   2 
  -9  -7  -1 5.48442 2.02266   3 
  -9  -7  -1 4.53534 1.49978   4 
   9   7   1 7.83565 2.04935   3 
   9   7   1 5.82432 1.20535   4 
   9   7   1 5.63398 2.53105   2 
  -9   7  -1 3.32556 2.09524   2 
  -9   7  -1 2.25701 1.96447   3 
 -11  -7  -1 45.3064 5.15343   2 
 -11  -7  -1 51.1833 3.65903   4 
 -11  -7  -1 50.0836 4.88491   3 
  11   7   1 52.4930 3.03809   4 
  11   7   1 48.5449 4.57110   3 
 -11   7  -1 51.1931 2.55236   4 
 -11   7  -1 55.6457 4.74983   3 
 -11   7  -1 46.4940 5.21328   2 
  13  -7   1 104.221 6.90492   3 
 -13  -7  -1 111.829 6.89760   3 
 -13  -7  -1 97.5083 7.91015   4 
 -13  -7  -1 96.7264 8.26857   2 
  13   7   1 111.727 8.47855   2 
 -13   7  -1 110.962 4.16015   4 
  13   7   1 97.5661 6.37992   3 
  13   7   1 112.904 4.62545   4 
 -13   7  -1 105.120 7.40893   2 
 -15  -7  -1 150.885 6.90767   4 
 -15  -7  -1 148.353 8.82555   3 
  15  -7   1 141.512 8.70070   3 
 -15  -7  -1 137.856 10.4609   2 
 -15   7  -1 165.129 9.59632   2 
  15   7   1 152.550 5.96531   4 
 -15   7  -1 153.110 5.56202   4 
  15   7   1 138.899 8.12980   3 
  15   7   1 165.795 10.5941   2 
 -15   7  -1 162.702 8.57920   3 
 -17  -7  -1 19.1665 5.07543   3 
 -17  -7  -1 16.5598 3.64831   4 
 -17  -7  -1 19.4456 6.18128   2 
  17  -7   1 14.7461 5.06065   3 
  17   7   1 24.6068 5.91767   2 
  17   7   1 29.6507 5.11971   3 
  17   7   1 27.4093 3.04720   4 
 -17   7  -1 24.9821 3.02669   4 
 -17   7  -1 21.3579 5.58394   2 
 -17   7  -1 18.1420 4.84253   3 
 -19  -7  -1 6.84552 7.10485   2 
 -19  -7  -1 2.36367 3.75071   4 
 -19  -7  -1 1.19393 5.97896   3 
  19  -7   1 6.73622 5.32649   3 
 -19   7  -1 -8.1175 5.88395   2 
  19   7   1 7.96329 4.95889   3 
 -19   7  -1 -6.4762 4.89765   3 
  19   7   1 -12.816 6.89440   2 
 -19   7  -1 0.75463 3.26039   4 
  21  -7   1 14.3037 7.39896   3 
 -21  -7  -1 24.4429 6.05200   4 
 -21  -7  -1 12.2831 9.00590   2 
 -21   7  -1 25.4568 8.57191   2 
 -21   7  -1 34.6736 7.50150   3 
  21   7   1 40.1131 7.44569   3 
 -22  -8   1 4.09149 9.70457   2 
 -22   8   1 4.82472 5.30565   4 
  22   8  -1 13.6846 7.36727   3 
 -22   8   1 10.8090 8.78781   2 
 -20  -8   1 24.5498 4.40496   4 
 -20  -8   1 34.8838 9.07049   2 
 -20  -8   1 15.3267 11.4826   3 
 -20   8   1 21.8116 3.41964   4 
 -20   8   1 7.92815 7.00784   2 
  20   8  -1 31.6247 7.25142   3 
 -20   8   1 15.4939 7.19884   3 
 -18  -8   1 4.18943 6.29048   2 
 -18  -8   1 2.17873 5.29610   3 
 -18  -8   1 7.18681 2.98444   4 
 -18   8   1 6.90150 5.17015   3 
  18   8  -1 4.16486 4.25040   3 
 -18   8   1 10.2124 2.41066   4 
  18   8  -1 11.4815 6.81310   2 
 -18   8   1 7.22339 5.48444   2 
 -16  -8   1 20.9150 3.10958   4 
 -16  -8   1 25.4759 4.86884   3 
 -16  -8   1 22.4149 6.16539   2 
 -16   8   1 22.8070 2.95079   4 
 -16   8   1 22.2194 2.64550   4 
 -16   8   1 18.4501 4.86064   2 
 -16   8   1 25.6231 5.16348   3 
  16   8  -1 17.7177 4.23812   3 
  16   8  -1 9.23288 4.98117   2 
 -14  -8   1 77.8718 8.50829   2 
 -14  -8   1 74.3401 6.78459   3 
 -14  -8   1 74.1538 4.72728   4 
  14   8  -1 85.5452 6.43947   3 
 -14   8   1 80.6819 4.00665   4 
 -14   8   1 83.1391 7.20608   3 
 -14   8   1 82.5721 2.98802   4 
 -14   8   1 83.4972 7.23473   2 
  14   8  -1 75.8578 7.86922   2 
 -12  -8   1 701.932 19.3645   3 
 -12  -8   1 708.595 17.2920   4 
 -12  -8   1 659.994 21.0371   2 
 -12   8   1 678.257 16.2351   4 
 -12   8   1 706.037 15.5830   4 
  12   8  -1 672.253 19.2641   3 
  12   8  -1 696.696 21.0752   2 
 -12   8   1 689.336 19.5093   3 
 -12   8   1 708.816 19.6466   2 
 -10  -8   1 204.870 7.97065   3 
 -10  -8   1 189.369 9.34581   2 
 -10  -8   1 201.180 6.31372   4 
 -10   8   1 197.546 7.78598   2 
  10   8  -1 202.484 6.56545   4 
 -10   8   1 193.469 8.26101   3 
  10   8  -1 205.081 9.22096   2 
  10   8  -1 211.448 7.91876   3 
  -8  -8   1 61.6366 3.03631   4 
  -8  -8   1 66.6335 5.41946   2 
  -8  -8   1 59.0746 4.12044   3 
  -8   8   1 60.7730 4.02579   2 
   8   8  -1 64.2708 4.06530   3 
   8   8  -1 59.2056 3.08764   4 
   8   8  -1 57.5450 5.23749   2 
  -8   8   1 61.0037 4.60090   3 
  -6  -8   1 665.489 17.0334   3 
  -6  -8   1 676.996 18.3981   2 
  -6  -8   1 668.985 15.7820   4 
   6   8  -1 661.359 18.1878   2 
   6   8  -1 653.955 15.9357   4 
  -6   8   1 655.463 16.7858   2 
   6   8  -1 673.371 16.9816   3 
  -6   8   1 644.923 17.2948   3 
   4  -8  -1 924.873 20.9376   4 
  -4  -8   1 905.989 21.1163   4 
  -4  -8   1 925.640 23.3487   2 
  -4  -8   1 945.750 22.3343   3 
  -4   8   1 904.063 21.9547   2 
  -4   8   1 903.727 22.5292   3 
   4   8  -1 933.002 22.1611   3 
   4   8  -1 943.892 23.3811   2 
  -4   8   1 906.340 20.5034   4 
   2  -8  -1 541.179 13.3271   2 
  -2  -8   1 536.992 13.6382   3 
  -2  -8   1 523.133 12.6989   4 
   2  -8  -1 538.022 14.0740   3 
  -2  -8   1 533.176 14.4984   2 
   2   8  -1 546.505 14.5891   2 
  -2   8   1 538.758 13.4440   2 
   2   8  -1 545.805 12.7994   4 
   2   8  -1 549.795 13.5471   3 
  -2   8   1 537.044 12.3745   4 
  -2   8   1 530.593 13.9347   3 
   0  -8   1 488.421 12.3274   3 
   0  -8  -1 478.660 12.7359   3 
   0  -8  -1 485.322 12.3451   2 
   0  -8   1 475.627 13.0214   2 
   0  -8   1 474.855 11.1943   4 
   0   8  -1 495.941 12.2342   3 
   0   8   1 493.107 12.7045   3 
   0   8   1 478.940 12.3236   2 
   0   8   1 477.207 11.3350   4 
   0   8  -1 482.903 13.1297   2 
  -2  -8  -1 287.968 8.56250   3 
  -2  -8  -1 288.663 8.52872   2 
  -2  -8  -1 285.026 7.57384   4 
   2  -8   1 293.777 6.77482   4 
   2  -8   1 280.845 8.05425   3 
   2  -8   1 290.100 8.72019   2 
  -2   8  -1 283.317 8.81734   2 
   2   8   1 287.474 7.26430   4 
  -2   8  -1 294.070 8.05576   3 
   2   8   1 277.732 8.31262   3 
   2   8   1 278.065 8.45863   2 
  -4  -8  -1 70.1259 3.17102   4 
   4  -8   1 69.9530 3.97139   2 
  -4  -8  -1 72.5942 3.97004   3 
   4  -8   1 79.8958 1.97389   4 
  -4  -8  -1 69.6434 4.28908   2 
   4   8   1 69.9078 3.69796   3 
   4   8   1 76.2843 4.37063   2 
  -4   8  -1 71.6232 4.40001   2 
   4   8   1 76.4433 2.85072   4 
  -4   8  -1 73.2773 3.61006   3 
  -6  -8  -1 274.873 8.88825   3 
  -6  -8  -1 270.364 7.84734   4 
  -6  -8  -1 292.085 9.65056   2 
  -6   8  -1 279.372 8.64640   3 
   6   8   1 286.763 7.52408   4 
   6   8   1 271.319 9.37183   2 
  -6   8  -1 282.672 9.34515   2 
  -6   8  -1 277.649 8.49572   3 
  -8  -8  -1 222.048 8.84079   2 
  -8  -8  -1 224.668 8.00619   3 
  -8  -8  -1 223.305 6.91184   4 
   8   8   1 224.885 6.41808   4 
   8   8   1 223.697 8.90335   2 
   8   8   1 224.963 7.89499   3 
  -8   8  -1 220.525 8.51205   2 
  -8   8  -1 211.964 7.67450   3 
 -10  -8  -1 591.575 15.2145   4 
 -10  -8  -1 583.790 17.9819   2 
 -10  -8  -1 548.351 17.7047   3 
  10   8   1 600.361 14.6268   4 
 -10   8  -1 605.228 16.2400   3 
  10   8   1 595.767 17.6021   2 
 -10   8  -1 615.207 17.1805   2 
 -10   8  -1 574.915 16.8929   2 
  10   8   1 577.796 16.3994   3 
 -12  -8  -1 204.858 7.20673   4 
 -12  -8  -1 185.599 9.98267   2 
 -12  -8  -1 201.696 8.75331   3 
 -12   8  -1 189.941 8.99624   2 
  12   8   1 188.870 8.47525   3 
 -12   8  -1 196.747 8.34731   3 
  12   8   1 197.475 9.82646   2 
  12   8   1 208.697 6.51714   4 
 -14  -8  -1 152.167 10.1603   2 
 -14  -8  -1 161.022 8.85471   3 
 -14  -8  -1 178.474 7.13564   4 
  14   8   1 170.760 6.20903   4 
 -14   8  -1 167.489 5.28439   4 
  14   8   1 150.095 8.26042   3 
 -14   8  -1 171.498 9.49570   2 
 -14   8  -1 162.424 8.44452   3 
  14   8   1 154.104 10.3729   2 
 -16  -8  -1 7.92810 5.65921   2 
 -16  -8  -1 7.03610 3.08152   4 
 -16  -8  -1 9.47429 4.15676   3 
  16   8   1 6.20307 2.15940   4 
 -16   8  -1 2.88641 4.50066   2 
 -16   8  -1 8.88463 2.29762   4 
 -16   8  -1 -1.5858 4.02243   3 
  16   8   1 4.56873 3.70164   3 
  16   8   1 3.24063 5.21332   2 
 -18  -8  -1 114.036 7.73385   4 
 -18  -8  -1 95.3166 10.3365   3 
 -18  -8  -1 131.883 12.7084   2 
 -18   8  -1 112.419 11.0267   2 
 -18   8  -1 106.933 5.87906   4 
  18   8   1 107.592 6.44094   4 
 -18   8  -1 110.733 9.66391   3 
  18   8   1 137.007 10.2612   3 
  18   8   1 106.836 12.6028   2 
 -20  -8  -1 30.8418 5.66762   4 
 -20  -8  -1 42.2026 9.92597   2 
 -20   8  -1 40.1729 7.44217   3 
 -20   8  -1 36.5414 4.37478   4 
  20   8   1 35.9039 6.67106   3 
 -20   8  -1 30.6238 8.19767   2 
 -22  -8  -1 25.8533 10.5069   2 
 -22   8  -1 21.2860 9.67856   2 
  22   8   1 28.4511 7.77597   3 
 -21  -9   1 10.9840 5.08056   4 
 -21  -9   1 18.6267 9.72317   2 
  21   9  -1 16.6040 6.31467   3 
 -21   9   1 28.6483 8.56424   2 
 -21   9   1 13.3459 4.43232   4 
 -19  -9   1 46.7578 9.09375   2 
 -19  -9   1 30.8221 7.02599   3 
 -19  -9   1 36.1304 4.57261   4 
  19   9  -1 29.5942 8.55180   2 
 -19   9   1 32.8106 3.70763   4 
 -19   9   1 29.6135 3.10401   4 
 -19   9   1 40.6096 7.15995   3 
  19   9  -1 43.6939 6.98660   3 
 -19   9   1 35.4752 7.25420   2 
 -17  -9   1 10.1498 2.96161   4 
 -17  -9   1 16.3581 5.27092   3 
 -17  -9   1 5.32829 5.92770   2 
 -17   9   1 19.7510 2.71983   4 
 -17   9   1 13.8654 2.04036   4 
  17   9  -1 12.2671 5.68319   2 
 -17   9   1 3.64962 4.87156   3 
 -17   9   1 13.4532 5.00656   2 
  17   9  -1 12.6214 4.45949   3 
 -15  -9   1 177.604 11.6950   2 
 -15  -9   1 178.330 9.78452   3 
 -15  -9   1 177.005 7.02085   4 
  15   9  -1 185.071 9.38951   3 
 -15   9   1 179.969 9.95065   2 
 -15   9   1 184.533 5.14603   4 
  15   9  -1 189.596 11.3517   2 
 -15   9   1 196.928 10.2389   3 
 -13  -9   1 310.160 9.09777   4 
 -13  -9   1 292.281 11.1766   3 
 -13  -9   1 282.217 13.1232   2 
 -13   9   1 284.327 11.3521   3 
  13   9  -1 286.499 12.8430   2 
  13   9  -1 279.828 10.8643   3 
 -13   9   1 295.180 11.4477   2 
 -11  -9   1 348.184 13.6070   2 
 -11  -9   1 366.006 11.9892   3 
 -11  -9   1 371.104 10.1309   4 
  11   9  -1 368.967 11.9924   3 
  11   9  -1 373.789 10.4880   4 
 -11   9   1 370.570 12.0056   2 
  11   9  -1 370.803 13.5275   2 
 -11   9   1 330.874 13.6754   3 
  -9  -9   1 57.0210 3.15161   4 
  -9  -9   1 56.4663 5.81272   2 
  -9  -9   1 53.9062 4.43513   3 
   9   9  -1 46.1291 5.55707   2 
  -9   9   1 45.8892 4.76895   3 
   9   9  -1 48.4318 3.10302   4 
   9   9  -1 56.2989 4.21867   3 
  -9   9   1 50.7743 4.66660   2 
  -9   9   1 48.0918 4.18050   2 
  -7  -9   1 92.4301 4.86341   3 
  -7  -9   1 88.2837 3.65679   4 
  -7  -9   1 92.0562 5.94170   2 
  -7   9   1 89.4429 5.03145   2 
   7   9  -1 92.5022 3.79098   4 
  -7   9   1 94.8654 5.22879   3 
  -7   9   1 93.3279 5.40642   3 
  -7   9   1 82.6358 4.42555   2 
   7   9  -1 92.7940 4.68949   3 
   7   9  -1 96.3554 6.04904   2 
  -5  -9   1 1537.86 33.6746   4 
  -5  -9   1 1517.42 36.2021   2 
  -5  -9   1 1506.46 34.9560   3 
   5  -9  -1 1456.00 33.0986   4 
  -5   9   1 1489.27 34.6642   2 
   5   9  -1 1511.58 36.1764   2 
  -5   9   1 1464.13 32.6904   4 
  -5   9   1 1483.91 35.2514   3 
   5   9  -1 1419.59 33.7328   4 
   5   9  -1 1487.53 34.8016   3 
   3  -9  -1 295.520 7.62925   4 
  -3  -9   1 292.363 7.59199   4 
   3  -9  -1 300.356 9.12665   3 
  -3  -9   1 291.458 9.64057   2 
  -3  -9   1 305.121 8.80607   3 
   3  -9  -1 301.072 8.39090   2 
   3   9  -1 297.128 8.59243   3 
  -3   9   1 303.356 7.12677   4 
  -3   9   1 290.839 8.55934   2 
   3   9  -1 282.207 7.70641   4 
   3   9  -1 297.767 9.72688   2 
  -3   9   1 297.033 8.99399   3 
  -1  -9   1 20.4048 2.18201   3 
   1  -9  -1 19.5013 2.54974   3 
   1  -9  -1 22.2445 2.26446   2 
   1  -9  -1 22.5727 1.90128   4 
  -1  -9   1 21.7567 2.72638   2 
   1   9  -1 22.5187 1.64869   4 
   1   9  -1 22.4347 2.24470   3 
  -1   9   1 22.7779 2.72505   2 
   1   9  -1 21.9619 2.74727   2 
  -1   9   1 20.7946 2.25942   3 
  -1   9   1 20.9705 1.42142   4 
   1  -9   1 25.5225 2.61235   3 
  -1  -9  -1 22.9269 2.64608   2 
   1  -9   1 24.1630 2.76972   2 
   1  -9   1 28.4251 1.47456   4 
  -1  -9  -1 24.1194 2.76657   3 
   1   9   1 25.9402 2.63256   3 
   1   9   1 26.4428 1.64530   4 
  -1   9  -1 26.1844 2.37870   3 
  -1   9  -1 26.7795 3.01447   2 
   1   9   1 30.7373 2.96115   2 
   3  -9   1 862.147 21.3873   2 
  -3  -9  -1 839.856 20.1464   4 
   3  -9   1 871.669 20.8585   3 
  -3  -9  -1 848.349 21.3365   3 
   3  -9   1 842.897 19.0957   4 
  -3  -9  -1 870.604 21.4638   2 
   3   9   1 858.536 21.1652   3 
   3   9   1 839.036 21.3049   2 
  -3   9  -1 877.417 21.6728   2 
   3   9   1 847.090 19.7970   4 
  -3   9  -1 870.928 20.7454   3 
  -5  -9  -1 716.549 17.5869   4 
  -5  -9  -1 722.130 18.7628   3 
  -5  -9  -1 742.440 19.4095   2 
  -5   9  -1 733.826 19.0897   2 
   5   9   1 729.811 17.2145   4 
  -5   9  -1 725.993 18.2832   3 
   5   9   1 746.378 19.3148   2 
   5   9   1 711.641 18.5758   3 
  -7  -9  -1 358.599 11.2165   3 
  -7  -9  -1 368.525 12.1491   2 
  -7  -9  -1 366.552 10.0427   4 
   7   9   1 365.965 11.0208   3 
  -7   9  -1 355.188 10.7308   3 
  -7   9  -1 357.158 10.8763   3 
   7   9   1 381.459 11.9723   2 
   7   9   1 378.626 9.58802   4 
  -7   9  -1 365.232 11.6512   2 
  -9  -9  -1 407.087 11.1290   4 
  -9  -9  -1 401.736 12.4018   3 
  -9  -9  -1 398.339 13.4568   2 
   9   9   1 398.363 10.4849   4 
  -9   9  -1 420.635 12.9862   2 
  -9   9  -1 375.316 12.4184   2 
   9   9   1 404.681 12.2721   3 
  -9   9  -1 396.493 12.0580   3 
   9   9   1 397.534 13.3876   2 
 -11  -9  -1 416.995 11.6885   4 
 -11  -9  -1 403.544 13.1601   3 
 -11  -9  -1 413.911 14.6476   2 
  11   9   1 391.401 14.1164   2 
  11   9   1 422.962 11.0257   4 
 -11   9  -1 412.616 13.9130   2 
 -11   9  -1 406.380 12.7399   3 
 -11   9  -1 409.717 13.5574   2 
  11   9   1 395.752 12.9119   3 
 -13  -9  -1 71.2683 7.78994   2 
 -13  -9  -1 76.6355 6.60629   3 
 -13   9  -1 77.6065 6.88970   2 
 -13   9  -1 70.0450 7.92191   2 
  13   9   1 82.4277 6.34296   3 
  13   9   1 78.3329 4.24760   4 
  13   9   1 64.8137 7.72607   2 
 -13   9  -1 77.2675 6.55800   3 
 -15  -9  -1 91.8292 7.77645   3 
 -15  -9  -1 87.8673 9.81489   2 
 -15  -9  -1 96.3777 6.09529   4 
 -15   9  -1 96.7514 7.71995   3 
  15   9   1 90.3939 9.67220   2 
  15   9   1 76.1216 7.16919   3 
  15   9   1 91.7432 4.88018   4 
 -15   9  -1 88.4403 8.37166   2 
 -17  -9  -1 20.6597 3.95653   4 
 -17  -9  -1 14.6659 5.34164   3 
 -17  -9  -1 8.36889 6.31035   2 
  17   9   1 15.5788 4.49040   3 
 -17   9  -1 13.7406 6.40930   2 
  17   9   1 34.4868 7.64637   2 
 -17   9  -1 9.23768 5.17063   3 
  17   9   1 20.3497 3.02903   4 
 -19  -9  -1 27.2314 6.87877   3 
 -19  -9  -1 38.0250 5.66694   4 
 -19  -9  -1 36.4282 9.08271   2 
 -19   9  -1 50.6445 7.28856   3 
  19   9   1 44.4253 8.89795   2 
  19   9   1 44.5946 6.93550   3 
 -19   9  -1 37.8053 7.75662   2 
 -21  -9  -1 22.5099 8.72529   4 
 -21  -9  -1 35.5313 9.94741   2 
 -21   9  -1 39.5967 7.80578   3 
  21   9   1 23.1540 7.34401   3 
 -21   9  -1 50.7952 9.75793   2 
 -22 -10   1 4.66492 10.4571   2 
 -22  10   1 14.7781 9.21125   2 
  22  10  -1 13.5447 7.86265   3 
 -20 -10   1 -3.1617 4.28870   4 
 -20 -10   1 8.54044 8.99722   2 
 -20  10   1 4.69223 7.02441   2 
 -20  10   1 19.7141 7.40971   3 
  20  10  -1 2.89679 5.88585   3 
 -18 -10   1 10.9941 3.39608   4 
 -18 -10   1 18.4295 6.30276   3 
 -18 -10   1 24.8787 7.68078   2 
  18  10  -1 8.76414 4.90614   3 
 -18  10   1 18.9188 6.32896   2 
  18  10  -1 11.8143 7.47178   2 
 -18  10   1 20.0838 6.15798   3 
 -16 -10   1 1.24377 2.56951   4 
 -16 -10   1 3.59207 5.78404   2 
 -16 -10   1 -4.4967 4.26211   3 
 -16  10   1 3.65818 4.71625   3 
  16  10  -1 -0.3815 3.62507   3 
  16  10  -1 5.76513 5.23494   2 
 -16  10   1 -0.5282 4.38239   2 
 -14 -10   1 163.972 10.7683   2 
 -14 -10   1 147.245 8.88382   3 
 -14 -10   1 159.198 6.54331   4 
 -14  10   1 143.362 9.06026   3 
  14  10  -1 155.035 10.7123   2 
 -14  10   1 182.999 9.43582   2 
  14  10  -1 160.268 8.54856   3 
 -12 -10   1 0.09236 3.05052   3 
 -12 -10   1 -4.3917 3.72722   2 
 -12 -10   1 1.23374 1.76277   4 
  12  10  -1 3.01850 2.70149   3 
 -12  10   1 -0.2221 3.42335   3 
  12  10  -1 -2.1482 4.22551   2 
 -12  10   1 -3.6063 3.33195   2 
 -12  10   1 1.80852 2.98839   2 
 -10 -10   1 146.724 7.18287   3 
 -10 -10   1 161.130 9.01610   2 
 -10 -10   1 161.072 5.63321   4 
 -10  10   1 153.049 7.01963   2 
 -10  10   1 165.384 7.87672   3 
  10  10  -1 151.966 5.80552   4 
  10  10  -1 159.796 9.02446   2 
 -10  10   1 150.035 7.40940   2 
  10  10  -1 154.388 7.05330   3 
  -8 -10   1 1.37138 2.45862   2 
  -8 -10   1 -2.0262 1.79200   3 
  -8 -10   1 0.82727 1.85400   4 
  -8  10   1 -3.0935 1.96883   3 
   8  10  -1 -0.4051 2.62696   2 
  -8  10   1 -0.2029 2.37290   3 
   8  10  -1 2.31373 1.26383   4 
   8  10  -1 2.87974 1.91773   3 
  -8  10   1 -0.9258 1.71804   2 
  -8  10   1 -1.7160 2.15538   2 
  -6 -10   1 221.531 7.80245   3 
  -6 -10   1 213.946 6.39949   4 
  -6 -10   1 223.104 9.04397   2 
  -6  10   1 215.515 7.67083   2 
   6  10  -1 223.061 8.92798   2 
   6  10  -1 221.068 6.55829   4 
  -6  10   1 225.917 5.21563   4 
   6  10  -1 215.624 7.59130   3 
  -6  10   1 218.470 8.01435   3 
  -4 -10   1 173.598 6.47487   3 
  -4 -10   1 173.849 7.46011   2 
   4 -10  -1 176.803 5.12924   4 
   4 -10  -1 187.138 6.15565   2 
  -4 -10   1 171.612 5.23861   4 
  -4  10   1 185.288 6.56674   2 
  -4  10   1 184.689 4.56188   4 
   4  10  -1 166.046 7.36972   2 
  -4  10   1 183.153 6.74958   3 
   4  10  -1 174.346 6.25587   3 
   4  10  -1 168.940 5.41467   4 
   2 -10  -1 52.1051 3.36955   2 
  -2 -10   1 50.1408 3.53943   3 
   2 -10  -1 56.6422 2.65735   4 
  -2 -10   1 51.8838 4.14585   2 
   2 -10  -1 53.0034 3.83878   3 
   2  10  -1 55.2823 2.54774   4 
   2  10  -1 59.0828 4.63012   2 
  -2  10   1 61.5885 3.70468   2 
  -2  10   1 58.0737 3.76884   3 
   2  10  -1 54.5456 3.31566   3 
  -2  10   1 54.2715 2.13343   4 
   0 -10  -1 47.4785 3.51354   2 
   0 -10  -1 50.3921 3.77195   3 
   0 -10   1 52.2761 2.19398   4 
   0 -10  -1 50.3798 2.67659   4 
   0 -10   1 56.2358 3.54899   3 
   0 -10   1 46.4438 3.91518   2 
   0  10  -1 48.9638 4.27492   2 
   0  10   1 57.7216 3.58589   3 
   0  10   1 49.1042 2.17543   4 
   0  10  -1 43.4245 3.08867   3 
   0  10   1 52.7797 3.71487   2 
  -2 -10  -1 25.2324 2.84603   3 
   2 -10   1 25.6524 2.99411   3 
   2 -10   1 29.5367 3.18983   2 
   2 -10   1 24.1886 1.44782   4 
  -2 -10  -1 21.0199 2.20875   4 
  -2 -10  -1 23.3561 2.82590   2 
   2  10   1 23.0881 2.75310   2 
  -2  10  -1 22.5206 2.52114   3 
  -2  10  -1 24.4350 3.06620   2 
   2  10   1 21.5992 2.58674   3 
   2  10   1 23.7085 1.84817   4 
  -4 -10  -1 223.341 6.71687   4 
  -4 -10  -1 220.073 7.80609   3 
   4 -10   1 235.468 5.45779   4 
   4 -10   1 224.949 7.85670   2 
  -4 -10  -1 229.648 8.17163   2 
   4  10   1 224.134 7.61715   3 
   4  10   1 225.028 8.13406   2 
   4  10   1 203.597 6.68277   4 
  -4  10  -1 229.529 8.24469   2 
  -4  10  -1 217.628 7.26063   3 
  -6 -10  -1 18.8933 3.30480   2 
  -6 -10  -1 16.3173 2.59120   3 
  -6 -10  -1 22.1828 2.22469   4 
   6  10   1 18.1788 2.45632   3 
  -6  10  -1 25.6815 2.79347   3 
   6  10   1 20.4445 1.99776   4 
   6  10   1 17.0171 3.02186   2 
  -6  10  -1 25.2628 3.44160   2 
  -8 -10  -1 37.4153 4.47882   2 
  -8 -10  -1 39.9038 3.20612   4 
  -8 -10  -1 34.7417 3.89215   3 
   8  10   1 41.1476 4.55885   2 
  -8  10  -1 35.4351 4.16617   2 
   8  10   1 35.3260 3.91442   3 
  -8  10  -1 38.8347 4.14109   3 
   8  10   1 35.4511 2.46993   4 
  -8  10  -1 33.5674 3.94129   3 
 -10 -10  -1 20.0552 4.14074   2 
 -10 -10  -1 18.7451 3.61523   3 
 -10 -10  -1 19.8467 2.61550   4 
 -10  10  -1 18.6296 3.41476   2 
  10  10   1 20.1735 3.00199   3 
 -10  10  -1 23.2076 4.14546   2 
  10  10   1 18.4427 6.82039   2 
 -10  10  -1 21.8013 3.45283   3 
  10  10   1 20.2858 2.23635   4 
 -12 -10  -1 255.645 10.5251   3 
 -12 -10  -1 255.680 8.92997   4 
 -12 -10  -1 284.434 12.2263   2 
  12  10   1 269.572 8.23344   4 
  12  10   1 239.427 11.6884   2 
  12  10   1 260.466 10.2070   3 
 -12  10  -1 285.667 11.8265   2 
 -12  10  -1 272.990 11.0458   2 
 -14 -10  -1 -3.6475 3.43413   3 
 -14 -10  -1 -1.8250 4.49641   2 
 -14 -10  -1 0.29876 2.65364   4 
 -14  10  -1 5.87192 4.06858   2 
 -14  10  -1 -2.9099 4.75082   2 
  14  10   1 2.52096 1.74433   4 
 -14  10  -1 -3.8119 3.41884   3 
  14  10   1 8.81287 4.87602   2 
  14  10   1 4.10802 3.42126   3 
 -16 -10  -1 67.8488 6.29376   4 
 -16 -10  -1 61.4549 6.89873   3 
 -16 -10  -1 55.4957 8.16156   2 
 -16  10  -1 76.7105 8.02949   3 
 -16  10  -1 66.2305 8.22541   2 
  16  10   1 64.7748 8.39475   2 
  16  10   1 63.1125 6.61226   3 
  16  10   1 62.2026 4.76280   4 
 -16  10  -1 42.5319 6.79319   2 
 -18 -10  -1 20.6259 4.45113   4 
 -18 -10  -1 20.0909 6.42837   3 
 -18 -10  -1 18.4597 7.32404   2 
 -18  10  -1 9.58545 5.56613   3 
  18  10   1 13.3593 5.20490   3 
 -18  10  -1 20.7118 8.02224   2 
  18  10   1 9.62525 8.17648   2 
  18  10   1 15.7959 3.32447   4 
 -18  10  -1 20.0640 6.85786   2 
 -20 -10  -1 24.6151 9.62496   2 
 -20 -10  -1 27.0899 5.89345   4 
 -20  10  -1 28.7604 8.70400   2 
 -20  10  -1 42.4365 10.4217   2 
  20  10   1 17.1644 6.57583   3 
 -20  10  -1 25.9547 7.76706   3 
 -21 -11   1 28.7029 5.53501   4 
 -21 -11   1 36.2049 10.5369   2 
 -21  11   1 9.19509 8.59963   2 
  21  11  -1 16.6394 6.78204   3 
 -19 -11   1 51.9870 9.41809   2 
 -19 -11   1 38.0649 5.20209   4 
  19  11  -1 44.7877 7.25031   3 
 -19  11   1 40.3802 8.10004   2 
 -19  11   1 41.3795 7.92768   3 
 -17 -11   1 57.1435 7.53955   3 
 -17 -11   1 64.7125 9.38197   2 
 -17 -11   1 78.0827 6.13550   4 
  17  11  -1 83.3779 8.67204   3 
 -17  11   1 69.8270 7.94928   2 
 -17  11   1 68.0617 7.64583   3 
  17  11  -1 71.2760 9.04420   2 
 -15 -11   1 34.5162 3.78800   4 
 -15 -11   1 34.4006 6.90223   2 
 -15 -11   1 30.4533 5.43462   3 
 -15  11   1 38.0139 5.70541   2 
  15  11  -1 27.9358 5.60875   3 
 -15  11   1 29.8955 5.42001   3 
 -15  11   1 39.7503 6.43521   2 
  15  11  -1 34.5751 6.90055   2 
 -13 -11   1 397.186 13.9930   3 
 -13 -11   1 399.018 16.0390   2 
 -13 -11   1 406.706 11.6747   4 
  13  11  -1 405.882 13.8629   3 
 -13  11   1 425.661 14.4865   2 
 -13  11   1 396.934 14.3511   3 
  13  11  -1 397.479 16.1208   2 
 -13  11   1 394.362 13.9331   2 
 -11 -11   1 454.217 15.9970   2 
 -11 -11   1 421.593 13.8262   3 
 -11 -11   1 427.729 11.7359   4 
  11  11  -1 416.629 15.4709   2 
  11  11  -1 422.861 12.0104   4 
 -11  11   1 418.297 14.1702   3 
  11  11  -1 422.220 13.6173   3 
 -11  11   1 409.846 13.3391   2 
 -11  11   1 429.585 14.0226   2 
  -9 -11   1 115.170 7.71277   2 
  -9 -11   1 114.280 6.27538   3 
  -9 -11   1 107.579 4.55506   4 
  -9  11   1 107.411 6.84675   3 
  -9  11   1 110.974 5.86476   2 
   9  11  -1 115.208 6.00982   3 
  -9  11   1 102.318 6.45635   3 
   9  11  -1 91.3970 9.09860   2 
  -9  11   1 108.240 6.38667   2 
   9  11  -1 111.241 4.75217   4 
  -7 -11   1 103.162 6.61657   2 
  -7 -11   1 100.933 5.52039   3 
  -7 -11   1 94.6575 3.97237   4 
  -7  11   1 92.7713 5.44340   2 
   7  11  -1 97.0068 6.57028   2 
  -7  11   1 96.0519 5.54757   3 
   7  11  -1 93.9494 4.09703   4 
   7  11  -1 97.6689 5.12538   3 
  -5 -11   1 384.629 9.79645   4 
   5 -11  -1 370.694 9.38107   4 
  -5 -11   1 382.699 12.5104   2 
  -5 -11   1 380.694 11.3422   3 
   5  11  -1 366.856 9.89824   4 
  -5  11   1 366.501 11.3754   3 
  -5  11   1 371.051 11.0579   2 
   5  11  -1 377.109 12.5064   2 
  -5  11   1 376.333 8.72143   4 
   5  11  -1 366.844 10.9516   3 
  -3 -11   1 376.046 9.51606   4 
   3 -11  -1 379.870 10.5683   2 
  -3 -11   1 363.487 10.9358   3 
  -3 -11   1 371.654 11.8981   2 
   3 -11  -1 382.599 11.3496   3 
   3 -11  -1 371.328 9.57416   4 
  -3  11   1 367.774 11.0971   3 
   3  11  -1 358.095 9.61795   4 
  -3  11   1 376.547 10.8400   2 
   3  11  -1 384.325 12.0426   2 
  -3  11   1 372.045 8.91323   4 
   3  11  -1 370.933 10.7012   3 
  -1 -11   1 339.535 10.1191   3 
   1 -11  -1 337.524 9.95772   2 
   1 -11  -1 337.565 10.5296   3 
   1 -11  -1 349.298 9.10871   4 
  -1 -11   1 335.518 10.8801   2 
   1  11  -1 354.481 9.98049   3 
  -1  11   1 346.071 8.51006   4 
   1  11  -1 343.538 8.83684   4 
  -1  11   1 356.361 10.2384   2 
  -1  11   1 339.309 10.3011   3 
   1  11  -1 345.012 11.1268   2 
   1 -11   1 1973.18 45.0675   3 
  -1 -11  -1 1973.99 45.2933   2 
  -1 -11  -1 1984.85 45.6641   3 
   1 -11   1 1895.08 45.6841   2 
  -1  11  -1 1970.79 45.9737   2 
   1  11   1 1886.80 43.5732   4 
   1  11   1 2000.81 45.3463   2 
  -1  11  -1 1953.97 44.9016   3 
   1  11   1 1970.04 45.4208   3 
   3 -11   1 439.177 10.2550   4 
  -3 -11  -1 443.174 11.4028   4 
  -3 -11  -1 439.494 12.7701   2 
   3 -11   1 433.774 12.7273   2 
  -3 -11  -1 426.000 12.7130   3 
   3 -11   1 442.320 12.2232   3 
  -3  11  -1 435.825 12.0581   3 
  -3  11  -1 432.469 13.0416   2 
   3  11   1 431.059 12.4344   3 
   3  11   1 435.980 10.8763   4 
   3  11   1 433.760 12.7113   2 
   5 -11   1 392.280 11.8143   2 
  -5 -11  -1 389.141 10.6938   4 
   5 -11   1 396.220 9.15206   4 
  -5 -11  -1 387.555 11.9993   3 
  -5 -11  -1 403.425 12.4807   2 
   5  11   1 403.862 12.4634   2 
   5  11   1 395.222 11.6994   3 
  -5  11  -1 387.892 11.3290   3 
   5  11   1 401.879 10.1972   4 
  -5  11  -1 388.822 12.3185   2 
  -7 -11  -1 444.022 14.5320   2 
  -7 -11  -1 453.642 12.3536   4 
  -7 -11  -1 454.025 13.7690   3 
  -7  11  -1 467.757 14.2120   2 
  -7  11  -1 462.304 13.2331   3 
   7  11   1 446.681 13.3808   3 
   7  11   1 473.162 11.7882   4 
  -7  11  -1 471.036 13.5158   3 
   7  11   1 465.019 14.4542   2 
  -9 -11  -1 286.399 8.99902   4 
  -9 -11  -1 299.868 10.6350   3 
  -9 -11  -1 284.896 11.4828   2 
  -9  11  -1 275.905 10.0446   3 
   9  11   1 299.193 11.5796   2 
   9  11   1 279.370 10.1341   3 
  -9  11  -1 293.574 10.1944   3 
   9  11   1 305.743 8.41480   4 
  -9  11  -1 292.415 11.1182   2 
 -11 -11  -1 109.420 6.94398   3 
 -11 -11  -1 95.6985 8.39782   2 
 -11 -11  -1 101.826 5.41000   4 
 -11  11  -1 90.9407 7.03137   2 
  11  11   1 99.2463 6.35427   3 
  11  11   1 107.576 8.28376   2 
 -11  11  -1 106.775 8.23017   2 
  11  11   1 101.145 4.54387   4 
 -11  11  -1 98.7504 6.74018   3 
 -13 -11  -1 295.727 11.9681   3 
 -13 -11  -1 322.438 13.8543   2 
 -13  11  -1 311.068 12.5619   2 
  13  11   1 302.820 13.5021   2 
 -13  11  -1 297.795 13.4165   2 
  13  11   1 309.876 11.8659   3 
 -13  11  -1 284.740 11.4601   3 
  13  11   1 309.483 9.33143   4 
 -15 -11  -1 80.7522 6.38262   4 
 -15 -11  -1 61.5226 6.43159   3 
 -15 -11  -1 75.7495 9.02384   2 
 -15  11  -1 78.5613 6.92716   3 
 -15  11  -1 82.6519 8.36835   2 
  15  11   1 80.1869 4.95484   4 
  15  11   1 68.2789 7.82509   2 
 -15  11  -1 87.6152 8.80487   2 
  15  11   1 59.9762 7.88840   3 
 -17 -11  -1 55.5562 7.40887   3 
 -17 -11  -1 81.3953 7.23257   4 
 -17 -11  -1 89.2312 10.2019   2 
 -17  11  -1 71.8204 7.44898   3 
 -17  11  -1 64.8928 9.00095   2 
  17  11   1 67.5490 5.51614   4 
  17  11   1 83.0288 8.52485   3 
  17  11   1 59.1933 9.30484   2 
 -17  11  -1 68.3255 8.57037   2 
 -19 -11  -1 83.8080 11.1999   2 
 -19 -11  -1 91.2126 9.16732   4 
 -19  11  -1 63.6126 8.42582   3 
  19  11   1 83.8372 8.94576   3 
 -19  11  -1 92.1024 11.3252   2 
 -19  11  -1 80.9594 9.73604   2 
 -21 -11  -1 32.8773 10.9133   2 
 -21  11  -1 27.7204 8.08157   3 
  21  11   1 23.5903 7.69059   3 
 -21  11  -1 25.6374 9.77115   2 
 -20 -12   1 8.07209 8.87082   2 
 -20 -12   1 22.1312 5.38751   4 
  20  12  -1 14.6881 6.30883   3 
 -20  12   1 44.4253 11.1195   2 
 -20  12   1 9.96915 7.55831   2 
 -20  12   1 22.5512 9.16135   3 
 -18 -12   1 24.1441 4.38471   4 
 -18 -12   1 9.34902 6.42740   3 
 -18 -12   1 21.3214 8.30741   2 
 -18  12   1 23.7092 7.03532   3 
  18  12  -1 21.0400 5.76049   3 
  18  12  -1 22.8322 8.17664   2 
 -18  12   1 13.1090 7.94632   2 
 -16 -12   1 3.18216 6.34166   2 
 -16 -12   1 4.65114 3.02847   4 
 -16 -12   1 7.51878 5.27353   3 
  16  12  -1 -3.4389 5.82276   2 
 -16  12   1 5.35368 5.28910   3 
 -16  12   1 14.4953 6.23579   2 
 -16  12   1 6.79863 5.04437   2 
  16  12  -1 7.43551 4.20348   3 
 -14 -12   1 2.67222 3.81911   3 
 -14 -12   1 5.63759 2.44269   4 
 -14 -12   1 -0.7971 4.63266   2 
  14  12  -1 -5.4351 4.97613   2 
 -14  12   1 1.95704 4.91298   2 
 -14  12   1 1.20779 3.87168   2 
 -14  12   1 -1.9026 4.32188   3 
  14  12  -1 3.10256 3.50908   3 
 -12 -12   1 5.58615 4.23612   2 
 -12 -12   1 3.73927 3.25555   3 
 -12 -12   1 -0.2603 2.03269   4 
 -12  12   1 0.69314 3.63857   3 
 -12  12   1 9.50309 3.29512   2 
 -12  12   1 1.90771 3.97853   2 
  12  12  -1 5.79825 2.95691   3 
  12  12  -1 0.40410 4.22738   2 
 -12  12   1 3.18976 3.41492   3 
 -10 -12   1 31.6152 5.22712   2 
 -10 -12   1 25.2697 4.03693   3 
 -10 -12   1 19.0884 2.36790   4 
 -10  12   1 30.0736 4.32220   2 
  10  12  -1 23.2300 3.57795   3 
 -10  12   1 22.8672 4.09240   3 
 -10  12   1 28.0638 4.34524   3 
  10  12  -1 27.8720 3.20781   4 
  10  12  -1 34.2304 5.63708   2 
 -10  12   1 23.9950 3.62320   2 
  -8 -12   1 3.21559 1.60569   4 
  -8 -12   1 0.53443 3.18695   2 
   8  12  -1 1.82928 2.17726   3 
  -8  12   1 2.02214 2.72124   3 
   8  12  -1 2.75895 1.59456   4 
  -8  12   1 6.48008 2.72165   2 
   8  12  -1 2.16774 3.78238   2 
   6 -12  -1 78.1212 2.94704   4 
  -6 -12   1 72.9069 5.06354   3 
  -6 -12   1 80.7310 6.27922   2 
  -6 -12   1 73.5614 3.52643   4 
  -6  12   1 79.5349 5.15333   2 
  -6  12   1 76.7836 2.25077   4 
   6  12  -1 71.1010 3.57571   4 
  -6  12   1 68.7080 4.90920   3 
   6  12  -1 78.3383 6.07372   2 
   6  12  -1 68.8214 4.48229   3 
   4 -12  -1 35.3485 2.51359   4 
   4 -12  -1 33.7236 3.36339   2 
  -4 -12   1 25.8311 2.33375   4 
   4 -12  -1 35.0354 4.05163   3 
  -4 -12   1 30.2727 3.91368   2 
  -4 -12   1 36.1959 3.87833   3 
  -4  12   1 29.4703 1.60740   4 
  -4  12   1 32.5963 3.73622   3 
   4  12  -1 30.4905 3.22081   3 
  -4  12   1 36.1337 3.45993   2 
   4  12  -1 31.4543 3.70560   2 
   4  12  -1 29.7721 2.56880   4 
   2 -12  -1 11.1817 2.27392   2 
  -2 -12   1 13.1969 2.94774   2 
   2 -12  -1 11.3672 1.68941   4 
  -2 -12   1 11.2034 2.33545   3 
   2 -12  -1 16.7235 3.06976   3 
  -2  12   1 12.3787 2.46281   3 
   2  12  -1 14.8663 3.12483   2 
  -2  12   1 15.2206 2.63383   2 
  -2  12   1 12.7994 1.29403   4 
   2  12  -1 13.5828 1.68423   4 
   2  12  -1 13.2224 2.28631   3 
   0 -12  -1 82.5548 4.75269   2 
   0 -12   1 88.6271 4.84906   3 
   0 -12  -1 89.0395 3.81364   4 
   0 -12   1 90.0813 3.20052   4 
   0 -12   1 90.0372 5.42068   2 
   0 -12  -1 89.7527 5.13356   3 
   0  12   1 80.5800 4.87321   2 
   0  12  -1 88.7723 4.47829   3 
   0  12   1 77.2568 4.69093   3 
   0  12   1 85.0201 3.13240   4 
   0  12  -1 86.3051 5.69504   2 
  -2 -12  -1 242.691 8.53475   2 
   2 -12   1 242.111 6.24541   4 
  -2 -12  -1 242.487 8.59771   3 
  -2 -12  -1 209.156 7.80123   4 
   2 -12   1 240.298 8.70103   2 
   2 -12   1 240.096 8.18458   3 
   2  12   1 248.706 8.33264   3 
   2  12   1 242.515 6.65153   4 
   2  12   1 244.366 8.60646   2 
  -2  12  -1 239.440 7.90078   3 
  -2  12  -1 246.974 9.05189   2 
   4 -12   1 400.625 11.9716   2 
  -4 -12  -1 382.255 10.5638   4 
   4 -12   1 389.182 9.22359   4 
  -4 -12  -1 388.110 11.9533   3 
  -4 -12  -1 381.559 12.2303   2 
  -4  12  -1 393.342 12.3171   2 
   4  12   1 387.292 12.2141   2 
  -4  12  -1 386.546 11.2850   3 
   4  12   1 402.334 11.7482   3 
   4  12   1 349.077 10.5635   4 
  -6 -12  -1 91.7314 5.80144   3 
  -6 -12  -1 94.3669 6.28277   2 
  -6 -12  -1 102.968 4.56001   4 
  -6  12  -1 98.7959 5.20437   3 
   6  12   1 91.9267 5.26317   3 
  -6  12  -1 101.537 6.41234   2 
   6  12   1 86.4186 6.26706   2 
   6  12   1 92.7648 3.79522   4 
  -8 -12  -1 9.21529 2.15869   4 
  -8 -12  -1 18.0467 3.99168   2 
  -8 -12  -1 8.01012 3.03303   3 
  -8  12  -1 4.86937 2.61830   3 
   8  12   1 7.31247 2.66396   3 
  -8  12  -1 6.54111 2.93644   3 
  -8  12  -1 9.00021 3.39315   2 
   8  12   1 12.6980 1.91163   4 
   8  12   1 6.75471 3.33229   2 
 -10 -12  -1 8.85899 3.99796   2 
 -10 -12  -1 4.14740 3.07339   3 
 -10 -12  -1 14.6932 2.65983   4 
 -10  12  -1 11.6637 3.52322   3 
 -10  12  -1 13.7715 3.27011   3 
 -10  12  -1 9.49029 3.29416   2 
  10  12   1 12.8642 1.95681   4 
  10  12   1 11.7743 3.13387   3 
 -10  12  -1 15.8257 5.11024   2 
  10  12   1 12.5814 4.40340   2 
 -12 -12  -1 195.020 10.7248   2 
 -12 -12  -1 181.434 7.54595   4 
 -12 -12  -1 158.903 9.07107   3 
 -12  12  -1 184.569 9.16438   3 
 -12  12  -1 178.389 9.35844   2 
  12  12   1 185.070 6.63230   4 
 -12  12  -1 180.480 10.5536   2 
  12  12   1 178.890 10.7532   2 
  12  12   1 176.036 8.66576   3 
 -12  12  -1 185.742 9.17556   3 
 -14 -12  -1 2.10762 4.01881   3 
 -14 -12  -1 6.54554 5.47653   2 
 -14 -12  -1 7.95112 3.17348   4 
 -14  12  -1 -0.2646 5.35755   2 
  14  12   1 5.24315 2.10125   4 
 -14  12  -1 -0.6185 4.29319   2 
  14  12   1 8.22620 5.09895   2 
 -14  12  -1 4.09977 4.19997   3 
  14  12   1 10.3725 4.42305   3 
 -16 -12  -1 3.84960 5.01190   3 
 -16 -12  -1 0.92442 3.63094   4 
 -16 -12  -1 1.36514 6.28934   2 
  16  12   1 -3.7556 3.99057   3 
 -16  12  -1 1.18823 4.77545   3 
  16  12   1 -0.4302 5.94385   2 
 -16  12  -1 9.23140 5.45301   2 
  16  12   1 -2.7436 2.22332   4 
 -16  12  -1 3.66856 6.36339   2 
 -18 -12  -1 -3.0542 4.49680   4 
 -18 -12  -1 8.69004 6.46415   3 
 -18 -12  -1 5.41479 7.75079   2 
 -18  12  -1 13.0879 8.88542   2 
 -18  12  -1 0.90834 6.07959   3 
  18  12   1 -2.9698 7.89213   2 
  18  12   1 -1.5650 2.76078   4 
 -18  12  -1 -9.7816 6.51266   2 
  18  12   1 -4.8080 4.64469   3 
 -20 -12  -1 5.51643 9.27396   2 
 -20 -12  -1 4.19721 5.26705   4 
 -20  12  -1 9.65368 7.59157   3 
  20  12   1 -1.4010 6.32367   3 
 -20  12  -1 0.55993 11.8081   2 
 -20  12  -1 1.12070 8.28212   2 
 -21 -13   1 3.67600 10.7805   2 
 -21 -13   1 0.01764 5.82016   4 
  21  13  -1 10.7461 7.30941   3 
 -21  13   1 -13.013 12.3480   2 
 -21  13   1 12.5775 8.83462   2 
 -19 -13   1 54.4059 10.9080   2 
 -19 -13   1 53.2372 6.36521   4 
 -19  13   1 53.1235 8.68790   2 
  19  13  -1 58.6829 8.54293   3 
 -19  13   1 47.5328 10.4406   2 
 -19  13   1 55.3321 8.93401   3 
 -17 -13   1 30.2580 8.32082   2 
 -17 -13   1 18.8654 3.98271   4 
 -17 -13   1 18.9518 6.79441   3 
 -17  13   1 31.4368 6.31300   2 
  17  13  -1 24.3155 7.92495   2 
 -17  13   1 23.5931 6.85945   3 
  17  13  -1 29.1541 5.85598   3 
 -17  13   1 33.0453 8.30111   2 
 -15 -13   1 183.988 7.89030   4 
 -15 -13   1 185.636 13.2676   2 
 -15 -13   1 168.389 10.6612   3 
  15  13  -1 162.868 10.0336   3 
 -15  13   1 168.840 11.9618   2 
  15  13  -1 167.936 13.1705   2 
 -15  13   1 180.807 10.7001   2 
 -15  13   1 170.394 10.8411   3 
 -13 -13   1 93.2458 9.96824   2 
 -13 -13   1 79.4319 7.58240   3 
 -13 -13   1 86.5662 5.21053   4 
  13  13  -1 81.8619 7.17900   3 
 -13  13   1 86.3781 7.58524   2 
  13  13  -1 77.9226 8.30452   2 
 -13  13   1 92.6598 8.20345   3 
 -13  13   1 80.1701 8.78598   2 
 -13  13   1 75.3139 8.34028   3 
 -11 -13   1 114.582 9.18750   2 
 -11 -13   1 108.556 7.62517   3 
 -11 -13   1 118.438 5.45596   4 
 -11  13   1 119.996 8.40728   3 
  11  13  -1 109.273 9.68721   2 
 -11  13   1 129.681 8.15470   2 
 -11  13   1 108.438 6.99835   2 
  11  13  -1 114.154 7.14770   3 
 -11  13   1 130.792 8.10807   3 
  -9 -13   1 356.920 14.0308   2 
  -9 -13   1 364.457 12.3708   3 
  -9 -13   1 355.822 10.3071   4 
   9  13  -1 344.748 11.8446   3 
  -9  13   1 357.707 12.2673   2 
  -9  13   1 351.559 12.4530   3 
   9  13  -1 373.795 14.3010   2 
   9  13  -1 351.660 10.4400   4 
  -9  13   1 362.179 11.7120   2 
  -9  13   1 360.548 12.9018   3 
  -7 -13   1 38.9393 3.08170   4 
  -7 -13   1 38.5582 4.93842   2 
  -7  13   1 41.4464 4.92075   2 
  -7  13   1 35.7407 4.08336   3 
  -7  13   1 37.3828 1.46550   4 
   7  13  -1 38.1929 3.05497   4 
   7  13  -1 36.3628 4.95503   2 
   7  13  -1 36.8034 4.10449   3 
  -5 -13   1 8.53229 3.19430   2 
  -5 -13   1 6.52298 2.60916   3 
  -5 -13   1 5.96144 1.45502   4 
   5 -13  -1 8.80331 1.60858   4 
  -5  13   1 7.60407 2.62492   3 
  -5  13   1 6.64511 0.88017   4 
  -5  13   1 8.27635 2.75507   2 
   5  13  -1 9.40060 3.43223   2 
   5  13  -1 5.64164 2.03649   3 
   5  13  -1 7.43467 1.55244   4 
  -3 -13   1 39.9866 4.78895   2 
  -3 -13   1 32.0320 3.49967   3 
   3 -13  -1 40.3325 4.37679   3 
   3 -13  -1 32.8730 2.76178   4 
  -3 -13   1 36.5844 2.49930   4 
   3 -13  -1 33.2884 3.62627   2 
  -3  13   1 37.3087 4.00865   3 
   3  13  -1 32.5877 2.61684   4 
  -3  13   1 38.6516 4.14452   2 
   3  13  -1 38.3422 3.58260   3 
   3  13  -1 32.8379 4.08330   2 
  -3  13   1 36.4696 1.94017   4 
   1 -13  -1 1306.66 31.0965   2 
  -1 -13   1 1295.90 29.4709   4 
  -1 -13   1 1302.50 31.3468   3 
   1 -13  -1 1311.62 31.7958   3 
  -1 -13   1 1285.42 32.1630   2 
   1  13  -1 1295.25 32.2820   2 
   1  13  -1 1281.59 29.6012   4 
  -1  13   1 1279.30 31.4827   3 
  -1  13   1 1247.00 29.1267   4 
   1  13  -1 1301.09 30.9930   3 
  -1  13   1 1299.96 31.2542   2 
   1 -13   1 292.220 10.1256   2 
   1 -13   1 280.586 9.45046   3 
  -1 -13  -1 294.352 9.73837   2 
   1 -13   1 288.830 7.57802   4 
  -1 -13  -1 295.699 10.0425   3 
   1  13   1 286.650 9.60630   3 
  -1  13  -1 282.477 10.2952   2 
   1  13   1 292.118 7.72858   4 
   1  13   1 300.521 9.82081   2 
  -1  13  -1 296.611 9.23245   3 
   3 -13   1 86.5779 5.07454   3 
   3 -13   1 89.0165 5.47896   2 
  -3 -13  -1 80.0731 5.31618   3 
   3 -13   1 84.7319 3.02180   4 
  -3 -13  -1 86.2275 5.50090   2 
  -3 -13  -1 78.5369 4.03442   4 
  -3  13  -1 88.7512 4.85386   3 
   3  13   1 88.7339 3.53332   4 
   3  13   1 87.0096 5.11757   3 
   3  13   1 77.1644 5.54743   2 
  -3  13  -1 78.4950 5.96956   2 
  -5 -13  -1 2.80410 2.75937   2 
   5 -13   1 0.66748 0.86717   4 
  -5 -13  -1 -0.9543 2.26519   3 
  -5 -13  -1 -2.7376 1.42094   4 
   5 -13   1 0.75931 2.33953   2 
  -5  13  -1 0.59173 3.02278   2 
   5  13   1 4.84981 2.78808   2 
   5  13   1 -1.2388 1.88023   3 
   5  13   1 0.86050 1.07796   4 
  -5  13  -1 -1.9899 1.82566   3 
  -7 -13  -1 369.824 12.4072   3 
  -7 -13  -1 351.228 12.9057   2 
  -7 -13  -1 369.758 10.6850   4 
  -7  13  -1 361.445 11.5952   3 
  -7  13  -1 359.661 12.6963   2 
   7  13   1 369.264 11.9034   3 
   7  13   1 386.086 10.0365   4 
   7  13   1 358.959 12.9207   2 
  -9 -13  -1 54.0780 4.35015   4 
  -9 -13  -1 49.8194 5.86321   2 
  -9 -13  -1 55.1323 6.04483   3 
  -9  13  -1 55.2756 5.36363   3 
  -9  13  -1 46.0517 5.69618   2 
   9  13   1 60.5190 5.37677   3 
   9  13   1 61.4978 6.34450   2 
   9  13   1 53.3756 3.41606   4 
  -9  13  -1 57.6792 5.85085   3 
 -11 -13  -1 270.515 9.21839   4 
 -11 -13  -1 271.302 12.5653   2 
 -11 -13  -1 251.334 11.1035   3 
  11  13   1 255.525 10.4287   3 
 -11  13  -1 262.760 10.6651   3 
  11  13   1 274.630 8.40938   4 
 -11  13  -1 254.988 11.0991   2 
  11  13   1 248.616 12.3464   2 
 -11  13  -1 261.529 11.9917   2 
 -11  13  -1 251.694 10.6651   3 
 -13 -13  -1 70.2980 7.71301   3 
 -13 -13  -1 56.4804 6.76933   4 
 -13 -13  -1 66.6974 7.65293   2 
  13  13   1 64.0183 6.47976   3 
 -13  13  -1 79.2297 9.27718   2 
 -13  13  -1 73.2820 7.59947   2 
  13  13   1 69.9631 4.51927   4 
 -13  13  -1 72.2587 7.56725   3 
  13  13   1 56.6539 7.35645   2 
 -13  13  -1 65.8284 6.40751   3 
 -15 -13  -1 56.0289 5.32238   4 
 -15 -13  -1 54.0109 6.94671   3 
 -15 -13  -1 53.2513 7.77268   2 
 -15  13  -1 81.0495 8.74375   2 
 -15  13  -1 51.5947 6.50938   3 
 -15  13  -1 45.9935 7.91132   2 
  15  13   1 50.1668 7.84375   2 
  15  13   1 46.8384 5.85051   3 
  15  13   1 50.5234 4.85159   4 
 -17 -13  -1 130.179 13.4726   2 
 -17 -13  -1 98.3573 11.3979   3 
 -17 -13  -1 111.236 8.83035   4 
 -17  13  -1 100.043 11.1041   2 
 -17  13  -1 92.9731 10.9630   2 
 -17  13  -1 73.5890 8.11043   3 
  17  13   1 77.1391 9.97022   2 
  17  13   1 101.161 6.56337   4 
  17  13   1 91.4182 9.83289   3 
 -19 -13  -1 45.1292 9.81870   2 
 -19 -13  -1 33.7111 6.04235   4 
 -19  13  -1 26.9701 10.4907   2 
 -19  13  -1 39.2206 8.79968   2 
 -19  13  -1 40.9730 8.19001   3 
  19  13   1 36.9456 7.28135   3 
 -20 -14   1 33.3974 11.0828   2 
 -20 -14   1 32.7845 6.44904   4 
  20  14  -1 31.5837 7.80518   3 
 -20  14   1 24.1751 8.49913   2 
 -20  14   1 56.0116 11.4548   2 
 -18 -14   1 66.8008 10.3633   2 
 -18 -14   1 42.4555 5.73425   4 
 -18  14   1 40.1541 8.71239   3 
 -18  14   1 61.9649 10.1169   2 
 -18  14   1 43.6834 8.06635   2 
  18  14  -1 51.3790 7.26041   3 
 -18  14   1 47.0760 8.17865   3 
 -16 -14   1 48.2248 4.97338   4 
 -16 -14   1 50.4486 7.66942   3 
 -16 -14   1 45.8530 8.40606   2 
 -16  14   1 34.3443 7.07769   3 
 -16  14   1 54.9206 8.50282   2 
  16  14  -1 58.2784 9.67737   2 
 -16  14   1 45.0121 7.21975   3 
  16  14  -1 39.3366 5.81971   3 
 -16  14   1 28.3954 6.22592   2 
 -14 -14   1 20.1721 5.12033   3 
 -14 -14   1 30.8067 3.93749   4 
 -14 -14   1 33.5628 8.79883   2 
 -14  14   1 44.6262 5.73363   2 
 -14  14   1 33.6223 6.71852   2 
  14  14  -1 29.0699 5.00514   3 
  14  14  -1 37.0945 7.40460   2 
 -14  14   1 42.6794 6.22616   3 
 -14  14   1 27.1328 5.84673   3 
 -12 -14   1 138.434 8.88086   3 
 -12 -14   1 133.811 10.5762   2 
 -12 -14   1 138.833 6.40934   4 
 -12  14   1 137.606 9.67459   3 
 -12  14   1 150.270 9.06559   3 
  12  14  -1 149.134 10.8417   2 
  12  14  -1 148.944 8.37647   3 
 -12  14   1 143.807 8.57712   2 
 -12  14   1 138.552 9.59884   2 
 -10 -14   1 33.3917 3.67904   4 
 -10 -14   1 39.6302 6.17880   2 
 -10 -14   1 41.5886 5.21412   3 
  10  14  -1 34.7338 6.39151   2 
 -10  14   1 29.6381 4.84780   3 
  10  14  -1 37.2824 4.65215   3 
  10  14  -1 35.8031 3.79625   4 
 -10  14   1 30.0634 4.17752   2 
 -10  14   1 36.2572 5.27759   3 
 -10  14   1 29.0948 4.86784   2 
  -8 -14   1 76.3755 6.56152   3 
  -8 -14   1 77.7476 7.70734   2 
  -8 -14   1 76.4204 4.25979   4 
  -8  14   1 81.2495 6.28092   3 
  -8  14   1 74.7406 6.32816   2 
   8  14  -1 74.0139 4.28238   4 
   8  14  -1 73.3004 7.78505   2 
   8  14  -1 82.0787 5.74268   3 
  -6 -14   1 77.7299 6.74082   2 
   6 -14  -1 69.8038 3.29572   4 
  -6 -14   1 68.0898 3.85361   4 
  -6  14   1 77.4284 2.42537   4 
  -6  14   1 69.7039 5.44380   3 
   6  14  -1 71.2943 6.87959   2 
  -6  14   1 69.5290 5.78321   2 
   6  14  -1 72.4906 5.05529   3 
   6  14  -1 68.9610 3.83682   4 
  -4 -14   1 478.354 15.5205   2 
  -4 -14   1 496.884 12.6607   4 
   4 -14  -1 497.216 14.9424   3 
  -4 -14   1 494.547 14.5909   3 
   4 -14  -1 492.463 13.7917   2 
   4 -14  -1 500.717 12.5673   4 
   4  14  -1 476.320 12.7464   4 
   4  14  -1 485.811 14.0724   3 
  -4  14   1 491.770 14.6348   3 
  -4  14   1 490.840 14.3068   2 
  -4  14   1 496.935 11.6146   4 
   4  14  -1 495.274 15.6110   2 
  -2 -14   1 34.9600 3.89800   3 
   2 -14  -1 25.7889 3.26750   2 
   2 -14  -1 28.8495 3.91962   3 
   2 -14  -1 25.7231 2.80942   4 
  -2 -14   1 32.2911 4.35681   2 
   2  14  -1 23.8307 2.50083   4 
  -2  14   1 27.3202 3.56272   2 
  -2  14   1 34.4575 3.67349   3 
   2  14  -1 35.9432 4.52188   2 
   2  14  -1 33.4398 3.51415   3 
  -2  14   1 29.2042 1.98487   4 
   0 -14  -1 16.0604 2.90696   2 
   0 -14   1 12.5629 1.65543   4 
   0 -14  -1 15.8054 2.26488   4 
   0 -14   1 17.5837 3.48041   2 
   0 -14  -1 12.6804 3.02260   3 
   0 -14   1 15.1962 2.87560   3 
   0  14   1 13.9494 2.86666   3 
   0  14  -1 15.1830 3.54941   2 
   0  14   1 17.3121 1.69906   4 
   0  14  -1 16.9316 2.65591   3 
   0  14   1 13.1539 3.01135   2 
  -2 -14  -1 637.763 17.6600   2 
   2 -14   1 642.156 17.8974   2 
  -2 -14  -1 630.463 17.8390   3 
   2 -14   1 627.885 15.0227   4 
   2 -14   1 642.648 17.3384   3 
   2  14   1 613.978 17.5538   2 
   2  14   1 628.248 15.2772   4 
  -2  14  -1 631.267 16.9292   3 
   2  14   1 627.582 17.3768   3 
  -2  14  -1 637.176 18.2168   2 
  -4 -14  -1 320.473 11.1950   2 
   4 -14   1 311.499 10.7738   2 
  -4 -14  -1 310.261 9.30911   4 
   4 -14   1 314.985 7.89923   4 
   4 -14   1 302.106 10.3174   3 
  -4  14  -1 305.472 11.2343   2 
  -4  14  -1 294.354 9.94851   3 
   4  14   1 315.211 8.56016   4 
   4  14   1 308.270 10.4442   3 
   4  14   1 307.408 11.0302   2 
  -6 -14  -1 55.0802 4.10992   4 
   6 -14   1 55.6477 5.33645   2 
  -6 -14  -1 53.0754 5.97376   2 
  -6 -14  -1 55.4259 5.70443   3 
  -6  14  -1 52.1989 5.97311   2 
  -6  14  -1 50.4147 4.69086   3 
   6  14   1 54.6333 6.02990   2 
   6  14   1 46.5126 4.83775   3 
   6  14   1 51.6016 3.09431   4 
  -8 -14  -1 28.9564 3.29973   4 
  -8 -14  -1 27.6615 4.24586   3 
  -8 -14  -1 29.1982 5.13838   2 
   8  14   1 27.1838 2.83727   4 
   8  14   1 31.7026 3.91714   3 
  -8  14  -1 30.2402 4.23283   3 
   8  14   1 24.8770 5.24782   2 
  -8  14  -1 35.1074 5.07044   2 
  -8  14  -1 32.0778 3.96048   3 
 -10 -14  -1 198.976 10.7375   2 
 -10 -14  -1 197.205 7.74275   4 
 -10 -14  -1 183.796 9.56646   3 
 -10  14  -1 189.313 10.3297   2 
 -10  14  -1 176.376 9.32219   3 
  10  14   1 184.548 6.61588   4 
  10  14   1 192.019 8.91986   3 
 -10  14  -1 187.160 8.92720   3 
  10  14   1 178.622 10.6698   2 
 -12 -14  -1 52.7527 7.03162   2 
 -12 -14  -1 33.9361 5.44857   3 
 -12 -14  -1 40.7519 4.55285   4 
 -12  14  -1 38.7357 5.72287   2 
 -12  14  -1 43.7950 6.51340   2 
  12  14   1 36.4903 3.71741   4 
 -12  14  -1 42.5658 5.24770   3 
  12  14   1 33.3139 4.81496   3 
  12  14   1 36.8371 6.39321   2 
 -12  14  -1 38.5478 5.45156   3 
 -14 -14  -1 48.2276 9.11302   2 
 -14 -14  -1 57.5118 6.59541   4 
 -14 -14  -1 57.5940 7.13465   3 
 -14  14  -1 58.7847 6.57525   3 
 -14  14  -1 54.0181 6.66766   2 
  14  14   1 55.6496 4.65968   4 
  14  14   1 43.5558 7.68021   2 
 -14  14  -1 49.7722 6.52743   3 
 -14  14  -1 58.7207 7.66600   2 
  14  14   1 46.6862 5.65294   3 
 -16 -14  -1 10.6110 4.24080   4 
 -16 -14  -1 17.7428 7.75298   2 
 -16 -14  -1 2.14471 6.15907   3 
  16  14   1 22.1688 7.47450   2 
  16  14   1 10.3819 3.16610   4 
 -16  14  -1 15.8115 5.42004   3 
  16  14   1 13.1962 5.11571   3 
 -16  14  -1 6.90502 7.52800   2 
 -16  14  -1 13.1203 5.97884   3 
 -16  14  -1 3.21609 7.03108   2 
 -18 -14  -1 28.4609 9.92085   2 
 -18 -14  -1 37.2385 5.49006   4 
  18  14   1 32.2245 6.68550   3 
 -18  14  -1 43.6737 7.78775   3 
  18  14   1 53.7557 6.08528   4 
 -18  14  -1 37.7728 8.35624   2 
 -18  14  -1 27.3906 10.4465   2 
 -20 -14  -1 7.04037 10.4445   2 
 -20 -14  -1 3.20005 5.48453   4 
 -20  14  -1 11.1154 8.38692   3 
  20  14   1 -6.0518 6.32803   3 
 -20  14  -1 16.7543 8.88473   2 
 -19 -15   1 11.7945 5.41990   4 
 -19 -15   1 -1.0125 9.34720   2 
 -19  15   1 0.23543 7.42804   3 
 -19  15   1 6.05582 7.89236   2 
  19  15  -1 -0.0040 6.31866   3 
 -19  15   1 10.6617 10.8643   2 
 -17 -15   1 30.9246 8.89525   2 
 -17 -15   1 34.5429 5.22600   4 
 -17  15   1 29.3146 9.07909   2 
 -17  15   1 39.3104 8.08311   3 
 -17  15   1 24.1486 8.09152   3 
 -17  15   1 38.5347 7.87657   2 
  17  15  -1 30.6176 9.10538   2 
  17  15  -1 36.3348 6.44026   3 
 -15 -15   1 9.17336 3.73159   4 
 -15 -15   1 -6.1110 6.32898   2 
 -15 -15   1 9.44410 6.10258   3 
  15  15  -1 7.15719 7.48261   2 
  15  15  -1 4.51465 4.46690   3 
 -15  15   1 11.4165 5.20884   2 
 -15  15   1 12.0482 5.94741   3 
 -15  15   1 20.8652 6.44276   2 
 -15  15   1 3.15075 6.19604   3 
 -13 -15   1 37.3426 3.90530   4 
 -13 -15   1 40.0535 7.52443   2 
 -13 -15   1 43.5049 6.23362   3 
 -13  15   1 47.4235 5.67942   2 
 -13  15   1 38.0024 6.32537   2 
  13  15  -1 55.7569 8.00353   2 
 -13  15   1 40.0667 6.17644   3 
 -13  15   1 42.8616 6.46332   3 
  13  15  -1 46.3110 6.03257   3 
 -11 -15   1 2.89839 2.46050   4 
 -11 -15   1 -1.3352 4.59923   2 
 -11 -15   1 0.96392 3.70444   3 
  11  15  -1 2.29699 2.91257   3 
 -11  15   1 3.33158 4.59341   3 
 -11  15   1 3.42588 3.40848   2 
 -11  15   1 6.12076 5.32404   2 
  11  15  -1 7.14727 5.56410   2 
 -11  15   1 0.62783 3.61338   3 
  -9 -15   1 16.8272 2.33070   4 
  -9 -15   1 7.71532 3.72985   3 
  -9 -15   1 9.12050 5.11194   2 
  -9  15   1 15.7365 4.00091   3 
   9  15  -1 6.03957 4.75055   2 
   9  15  -1 9.74313 3.35379   3 
   9  15  -1 14.6929 2.59406   4 
  -9  15   1 16.1581 4.21784   2 
  -7 -15   1 100.341 7.21513   3 
  -7 -15   1 99.9091 4.82622   4 
  -7 -15   1 108.265 8.23380   2 
  -7  15   1 101.239 6.96959   2 
   7  15  -1 95.6736 8.26463   2 
   7  15  -1 105.659 6.27486   3 
  -7  15   1 109.740 3.14591   4 
   7  15  -1 112.734 5.04260   4 
  -7  15   1 97.7054 6.73500   3 
  -5 -15   1 130.415 7.40141   3 
  -5 -15   1 127.070 5.07106   4 
  -5 -15   1 137.777 8.23438   2 
   5 -15  -1 127.668 4.89542   4 
   5 -15  -1 127.672 6.27698   2 
   5  15  -1 136.534 8.89434   2 
  -5  15   1 133.376 3.87398   4 
  -5  15   1 134.874 7.10144   3 
   5  15  -1 128.583 6.47714   3 
  -5  15   1 125.478 7.04524   2 
   3 -15  -1 27.1540 3.11462   4 
   3 -15  -1 34.9397 3.71723   2 
  -3 -15   1 38.4537 4.46000   3 
   3 -15  -1 34.7849 4.24190   3 
  -3 -15   1 28.3129 4.35925   2 
  -3  15   1 35.7465 3.98926   2 
   3  15  -1 28.5989 2.94865   4 
  -3  15   1 31.7216 3.85347   3 
   3  15  -1 32.6797 4.66684   2 
  -3  15   1 29.3198 2.01848   4 
   3  15  -1 37.2627 4.02193   3 
   1 -15  -1 17.3731 3.45982   3 
  -1 -15   1 20.9289 2.42876   4 
  -1 -15   1 24.2921 3.56508   3 
  -1 -15   1 19.8314 3.77294   2 
   1 -15  -1 25.5728 2.60945   4 
   1 -15  -1 17.5072 3.12940   2 
   1  15  -1 21.1905 4.06677   2 
   1  15  -1 26.1059 3.20017   3 
  -1  15   1 20.3504 2.00882   4 
  -1  15   1 25.4606 3.74159   2 
  -1  15   1 24.1081 3.67882   3 
  -1 -15  -1 163.023 9.17762   3 
  -1 -15  -1 157.783 7.31211   2 
   1 -15   1 152.395 7.73574   2 
   1 -15   1 155.469 5.12929   4 
   1 -15   1 163.190 7.32264   3 
  -1 -15  -1 157.952 5.92561   4 
   1  15   1 168.549 7.25476   3 
   1  15   1 157.847 5.08480   4 
  -1  15  -1 167.521 6.94250   3 
   1  15   1 156.570 7.55263   2 
  -1  15  -1 159.390 8.21617   2 
   3 -15   1 3.10592 2.91022   2 
  -3 -15  -1 2.25192 2.96686   3 
  -3 -15  -1 0.38453 1.77354   4 
  -3 -15  -1 7.81039 3.03728   2 
   3 -15   1 3.50199 1.26738   4 
   3 -15   1 3.65609 2.71809   3 
   3  15   1 1.86693 1.34015   4 
  -3  15  -1 1.58701 3.20707   2 
  -3  15  -1 1.11862 2.22640   3 
   3  15   1 3.56966 2.82387   2 
   3  15   1 9.12585 2.79144   3 
  -5 -15  -1 62.7865 6.21643   3 
  -5 -15  -1 65.6816 4.41100   4 
   5 -15   1 63.6657 5.64514   2 
  -5 -15  -1 61.7054 6.19580   2 
   5 -15   1 56.0567 2.73058   4 
   5  15   1 57.3453 6.15479   2 
  -5  15  -1 60.6925 6.35630   2 
  -5  15  -1 64.6122 5.10189   3 
   5  15   1 64.5436 3.41158   4 
   5  15   1 63.2816 5.32419   3 
  -7 -15  -1 2.36462 2.03069   4 
  -7 -15  -1 3.61499 3.72774   2 
  -7 -15  -1 11.1471 3.60356   3 
   7  15   1 1.12578 2.25637   3 
  -7  15  -1 5.37516 2.76211   3 
   7  15   1 1.79796 1.49182   4 
  -7  15  -1 0.57038 3.67253   2 
  -9 -15  -1 34.7953 5.66698   2 
  -9 -15  -1 27.1245 3.28897   4 
  -9 -15  -1 33.7941 4.96779   3 
   9  15   1 31.2538 3.25673   4 
   9  15   1 31.9816 5.48167   2 
  -9  15  -1 23.3118 4.15928   3 
   9  15   1 37.6034 4.54685   3 
  -9  15  -1 32.5569 5.60309   2 
  -9  15  -1 25.6127 4.71581   3 
 -11 -15  -1 53.2646 6.09954   3 
 -11 -15  -1 61.5156 7.14121   2 
 -11 -15  -1 69.7722 5.80172   4 
  11  15   1 74.9161 8.08037   2 
  11  15   1 80.2281 4.53752   4 
 -11  15  -1 74.3258 7.21834   3 
 -11  15  -1 71.5388 7.54279   3 
 -11  15  -1 73.2490 7.32180   2 
 -11  15  -1 77.3881 7.83538   2 
  11  15   1 57.4872 6.80011   3 
 -13 -15  -1 5.14841 5.64946   2 
 -13 -15  -1 -0.1783 4.86872   3 
 -13 -15  -1 1.70528 3.66726   4 
  13  15   1 7.01314 5.63934   2 
  13  15   1 12.0054 4.13377   3 
 -13  15  -1 -7.4149 5.86960   2 
  13  15   1 0.96679 2.10410   4 
 -13  15  -1 2.71288 4.74933   3 
 -13  15  -1 3.06493 4.33969   2 
 -13  15  -1 8.27034 4.63536   3 
 -15 -15  -1 9.80219 4.23330   4 
 -15 -15  -1 9.72235 6.33380   2 
 -15 -15  -1 8.72160 6.52099   3 
  15  15   1 5.48050 2.70101   4 
  15  15   1 -1.5551 6.09464   2 
 -15  15  -1 0.58356 5.07319   2 
 -15  15  -1 7.08105 7.19298   2 
 -15  15  -1 8.96568 5.46835   3 
  15  15   1 1.41462 4.66676   3 
 -15  15  -1 11.8627 5.43623   3 
 -17 -15  -1 -7.7533 7.50755   2 
 -17 -15  -1 11.9667 4.71598   4 
 -17  15  -1 11.9783 6.89556   3 
 -17  15  -1 7.62648 6.33782   3 
 -17  15  -1 -13.005 6.33019   2 
  17  15   1 -2.0577 7.96069   2 
 -17  15  -1 16.5611 9.20322   2 
  17  15   1 6.69491 5.66685   3 
  17  15   1 13.1197 3.52440   4 
 -19 -15  -1 6.59105 5.99397   4 
 -19 -15  -1 1.85406 9.35922   2 
 -19  15  -1 23.1614 8.41325   3 
  19  15   1 20.6901 6.61899   3 
 -19  15  -1 0.98304 8.40121   2 
 -19  15  -1 20.1563 11.0423   2 
 -19  15  -1 16.3627 7.33678   3 
 -18 -16   1 43.2544 10.6895   2 
 -18 -16   1 48.7427 6.12564   4 
 -18  16   1 13.9337 8.34902   3 
 -18  16   1 42.2125 8.32033   2 
  18  16  -1 26.6460 7.37357   3 
 -18  16   1 45.0543 10.4142   2 
 -18  16   1 48.9368 9.00550   3 
 -16 -16   1 125.203 12.1441   3 
 -16 -16   1 143.690 14.8739   2 
 -16 -16   1 135.939 8.84227   4 
  16  16  -1 142.589 11.3026   3 
 -16  16   1 131.986 11.5357   2 
 -16  16   1 123.924 12.2025   3 
 -16  16   1 157.820 14.3717   2 
  16  16  -1 110.298 12.2422   2 
 -16  16   1 109.918 12.6624   3 
 -14 -16   1 65.4006 7.77214   3 
 -14 -16   1 109.403 12.0481   2 
 -14 -16   1 56.0167 6.26383   4 
 -14  16   1 71.6666 13.0688   3 
 -14  16   1 61.2359 7.59269   3 
 -14  16   1 72.7464 8.44506   2 
 -14  16   1 53.9858 7.79959   2 
  14  16  -1 46.0613 8.58127   2 
  14  16  -1 87.3376 8.43594   3 
 -12 -16   1 67.1640 8.48063   2 
 -12 -16   1 52.7214 5.26743   4 
 -12 -16   1 41.8769 5.94650   3 
  12  16  -1 53.4868 7.73972   2 
 -12  16   1 60.6669 6.60211   3 
 -12  16   1 61.6176 7.12055   2 
 -12  16   1 63.2724 7.54349   3 
 -12  16   1 60.0738 7.25027   2 
 -10 -16   1 123.973 8.78493   3 
 -10 -16   1 130.551 10.3920   2 
 -10 -16   1 114.910 5.87188   4 
  10  16  -1 113.512 10.6247   2 
 -10  16   1 119.772 8.95007   2 
  10  16  -1 110.744 7.46295   3 
 -10  16   1 110.822 8.06549   3 
 -10  16   1 110.766 7.47965   2 
 -10  16   1 107.984 9.31840   3 
  -8 -16   1 72.8626 7.30695   3 
  -8 -16   1 74.2762 8.27348   2 
  -8 -16   1 77.0767 4.54387   4 
   8  16  -1 66.7697 6.01572   3 
  -8  16   1 83.4374 7.11611   2 
   8  16  -1 72.1606 4.66956   4 
  -8  16   1 67.7263 6.67317   3 
   8  16  -1 69.4747 8.37664   2 
  -6 -16   1 115.693 5.07766   4 
  -6 -16   1 120.991 8.44172   2 
  -6 -16   1 111.303 7.54780   3 
   6 -16  -1 113.209 4.60137   4 
   6  16  -1 114.274 5.17432   4 
  -6  16   1 117.420 7.20053   3 
   6  16  -1 111.778 6.51673   3 
  -6  16   1 116.523 3.60814   4 
   6  16  -1 124.450 8.84529   2 
  -6  16   1 115.298 7.25650   2 
  -4 -16   1 289.607 10.9199   3 
  -4 -16   1 288.565 8.67392   4 
   4 -16  -1 309.519 11.3721   3 
  -4 -16   1 289.882 11.9386   2 
   4 -16  -1 296.938 8.67524   4 
   4 -16  -1 294.184 10.1055   2 
  -4  16   1 290.636 10.7304   3 
  -4  16   1 298.391 7.58580   4 
  -4  16   1 296.113 10.6701   2 
   4  16  -1 286.231 16.5228   2 
   4  16  -1 288.964 10.2425   3 
   4  16  -1 291.797 8.86531   4 
   2 -16  -1 361.757 10.2258   4 
   2 -16  -1 358.400 11.6236   2 
  -2 -16   1 357.397 12.1987   3 
   2 -16  -1 369.819 12.6794   3 
  -2 -16   1 366.624 12.9866   2 
   2  16  -1 360.811 13.2013   2 
  -2  16   1 351.773 11.9720   3 
  -2  16   1 357.617 11.9694   2 
   2  16  -1 340.302 11.4443   3 
  -2  16   1 349.833 9.12896   4 
   0 -16  -1 162.238 6.68863   4 
   0 -16   1 183.356 8.59588   2 
   0 -16  -1 169.226 8.37034   3 
   0 -16   1 171.109 5.67420   4 
   0 -16  -1 170.303 7.90851   2 
   0 -16   1 170.758 7.94519   3 
   0  16   1 175.340 7.86506   3 
   0  16  -1 165.270 8.82546   2 
   0  16  -1 178.964 7.48632   3 
   0  16   1 164.561 5.28049   4 
   0  16   1 163.872 7.96098   2 
   2 -16   1 306.127 10.8868   3 
   2 -16   1 297.135 8.33051   4 
  -2 -16  -1 299.368 11.0696   2 
  -2 -16  -1 305.457 11.5000   3 
   2 -16   1 303.538 11.3026   2 
   2  16   1 318.423 10.8644   3 
  -2  16  -1 311.142 10.4017   3 
  -2  16  -1 307.801 11.7474   2 
   2  16   1 303.844 8.44030   4 
   2  16   1 302.209 11.1806   2 
  -4 -16  -1 104.493 5.46463   4 
  -4 -16  -1 116.403 7.35086   3 
   4 -16   1 126.268 7.33394   2 
   4 -16   1 110.704 6.79310   3 
  -4 -16  -1 117.547 7.55063   2 
   4 -16   1 110.785 4.06857   4 
   4  16   1 111.295 6.62065   3 
   4  16   1 114.957 4.61184   4 
   4  16   1 120.666 7.52949   2 
  -4  16  -1 122.405 7.97951   2 
  -4  16  -1 113.949 6.24948   3 
  -6 -16  -1 -0.1458 2.10257   4 
  -6 -16  -1 4.99379 3.50072   3 
  -6 -16  -1 -3.8323 3.42066   2 
   6 -16   1 3.42800 3.17730   2 
   6 -16   1 -1.4534 1.16958   4 
  -6  16  -1 -2.0216 3.60857   2 
  -6  16  -1 1.20330 2.65161   3 
   6  16   1 2.69712 3.68982   2 
   6  16   1 5.08943 2.87180   3 
   6  16   1 2.54033 1.42833   4 
  -8 -16  -1 160.874 10.1561   2 
  -8 -16  -1 192.384 7.77027   4 
  -8 -16  -1 184.443 9.63607   3 
   8  16   1 179.684 6.46234   4 
   8  16   1 182.958 8.65971   3 
   8  16   1 185.789 10.2767   2 
  -8  16  -1 182.382 8.55391   3 
  -8  16  -1 167.647 10.1356   2 
 -10 -16  -1 240.248 12.2710   2 
 -10 -16  -1 238.064 11.5304   3 
 -10 -16  -1 236.282 9.42198   4 
 -10  16  -1 264.194 12.6720   2 
 -10  16  -1 244.399 11.1828   3 
  10  16   1 251.987 12.6755   2 
  10  16   1 252.200 8.24133   4 
  10  16   1 250.373 10.8161   3 
 -10  16  -1 235.809 10.4342   3 
 -12 -16  -1 43.4854 7.26973   2 
 -12 -16  -1 54.7548 6.37279   4 
 -12 -16  -1 51.1041 6.87357   3 
  12  16   1 49.7967 7.40462   2 
 -12  16  -1 55.5143 6.07756   3 
 -12  16  -1 57.1213 6.54773   2 
 -12  16  -1 55.9056 7.66999   2 
 -12  16  -1 48.3452 6.50013   3 
  12  16   1 57.8110 6.33433   3 
  12  16   1 58.0547 4.60189   4 
 -14 -16  -1 2.58225 6.38438   2 
 -14 -16  -1 11.2635 6.14604   3 
 -14 -16  -1 2.60468 3.89445   4 
  14  16   1 0.98517 6.30761   2 
 -14  16  -1 5.89810 4.79256   3 
  14  16   1 7.40525 4.60144   3 
 -14  16  -1 11.8012 5.34520   2 
  14  16   1 7.07064 2.68501   4 
 -14  16  -1 6.90006 6.85011   2 
 -14  16  -1 4.37694 5.71472   3 
 -16 -16  -1 127.966 9.94262   4 
 -16 -16  -1 131.114 14.3297   2 
  16  16   1 129.353 11.0898   3 
 -16  16  -1 109.053 11.8679   2 
  16  16   1 128.514 14.5878   2 
 -16  16  -1 116.860 11.3794   2 
  16  16   1 145.042 7.66077   4 
 -16  16  -1 96.4440 11.3963   3 
 -16  16  -1 103.605 11.9050   3 
 -18 -16  -1 44.6071 7.04110   4 
 -18 -16  -1 33.9897 10.0898   2 
  18  16   1 35.6561 7.35852   3 
 -18  16  -1 47.8080 9.30803   2 
 -18  16  -1 60.6231 12.2558   2 
 -18  16  -1 50.4436 9.24574   3 
 -18  16  -1 53.7986 8.78589   3 
 -17 -17   1 4.05451 8.70331   2 
 -17 -17   1 1.72062 4.87447   4 
  17  17  -1 -1.5816 5.84870   3 
 -17  17   1 16.2334 9.13825   2 
 -17  17   1 5.74036 7.17696   3 
 -17  17   1 -3.4352 6.67607   2 
 -17  17   1 2.44912 8.11098   3 
 -15 -17   1 2.62825 4.04615   4 
 -15 -17   1 0.83835 7.49473   2 
 -15 -17   1 -1.6048 6.53171   3 
 -15  17   1 0.13952 5.88645   3 
 -15  17   1 3.68027 7.19753   2 
 -15  17   1 4.85730 6.76016   3 
 -15  17   1 -0.3122 5.40838   2 
  15  17  -1 -2.1619 4.66163   3 
  15  17  -1 1.24838 8.75794   2 
 -13 -17   1 22.0000 4.09461   4 
 -13 -17   1 24.2472 7.17186   2 
 -13 -17   1 24.8126 6.25283   3 
 -13  17   1 23.0581 5.35302   2 
 -13  17   1 27.7514 6.23582   3 
  13  17  -1 28.2202 7.76043   2 
 -13  17   1 17.8282 6.59873   3 
  13  17  -1 22.7144 5.37369   3 
 -13  17   1 27.4280 6.77413   2 
 -11 -17   1 1.70382 2.52412   4 
 -11 -17   1 0.41566 5.57021   2 
 -11 -17   1 -0.2920 4.42038   3 
 -11  17   1 -3.9488 3.62472   3 
 -11  17   1 5.84420 5.30078   3 
  11  17  -1 9.88265 6.00925   2 
 -11  17   1 -0.5569 3.76049   2 
 -11  17   1 0.17655 5.05835   2 
  -9 -17   1 80.6439 8.11661   3 
  -9 -17   1 69.2976 7.65931   2 
  -9 -17   1 64.5759 4.83701   4 
  -9  17   1 63.7467 7.03930   3 
   9  17  -1 81.9623 8.50499   2 
  -9  17   1 71.2887 8.01564   2 
   9  17  -1 58.3713 6.78772   3 
  -7 -17   1 6.20259 4.25694   3 
   7 -17  -1 5.54145 1.78446   4 
  -7 -17   1 9.50774 2.25796   4 
  -7 -17   1 2.67608 4.23385   2 
   7  17  -1 5.53913 3.14372   3 
  -7  17   1 5.66953 3.92603   2 
   7  17  -1 6.00605 4.73441   2 
  -7  17   1 11.8082 3.94731   3 
  -5 -17   1 4.34173 2.05415   4 
  -5 -17   1 9.60633 4.27509   2 
   5 -17  -1 6.13093 2.86391   2 
   5 -17  -1 3.64811 1.88935   4 
  -5 -17   1 3.86754 3.68303   3 
   5  17  -1 7.62438 4.60534   2 
  -5  17   1 3.84658 3.19290   3 
   5  17  -1 3.63569 2.75635   3 
  -5  17   1 0.96493 3.19980   2 
  -5  17   1 5.35627 1.20501   4 
   3 -17  -1 1.57383 1.85491   4 
   3 -17  -1 2.31078 2.78081   2 
  -3 -17   1 2.62904 3.61404   3 
  -3 -17   1 3.57712 3.74344   2 
   3 -17  -1 4.30151 3.45550   3 
   3  17  -1 6.91316 2.87791   3 
  -3  17   1 4.31627 3.14022   3 
  -3  17   1 1.06769 3.16005   2 
   3  17  -1 1.29212 4.42182   2 
  -3  17   1 1.78449 1.11918   4 
  -1 -17   1 29.9008 4.59313   2 
   1 -17  -1 19.2855 4.27873   3 
   1 -17  -1 22.8045 4.01283   2 
  -1 -17   1 17.7799 3.98757   3 
  -1 -17   1 19.4254 2.50511   4 
   1 -17  -1 20.7816 2.79558   4 
  -1  17   1 23.6891 2.35351   4 
   1  17  -1 24.2275 3.59535   3 
   1  17  -1 23.9575 4.61834   2 
  -1  17   1 22.1090 3.93348   2 
  -1  17   1 15.8221 3.49838   3 
   1 -17   1 -2.7690 3.29791   3 
  -1 -17  -1 2.82728 3.32985   3 
   1 -17   1 6.99554 3.43402   2 
  -1 -17  -1 1.95213 2.04459   4 
   1 -17   1 -0.2798 1.46087   4 
  -1 -17  -1 -4.2446 2.98950   2 
   1  17   1 4.28412 3.09934   2 
  -1  17  -1 8.63831 4.22445   2 
   1  17   1 -1.6240 2.63713   3 
  -1  17  -1 1.60249 2.38527   3 
   1  17   1 0.54283 1.29009   4 
  -3 -17  -1 5.77318 3.53093   2 
   3 -17   1 5.49731 3.22013   2 
   3 -17   1 1.82808 3.47019   3 
   3 -17   1 4.98673 1.60575   4 
  -3 -17  -1 2.54968 2.69015   4 
  -3 -17  -1 1.03539 3.59649   3 
  -3  17  -1 7.30783 3.81648   2 
   3  17   1 3.20820 2.68504   3 
   3  17   1 4.08442 1.55058   4 
   3  17   1 5.43448 3.40957   2 
  -3  17  -1 5.12058 2.68451   3 
  -5 -17  -1 27.8897 4.74591   2 
   5 -17   1 20.6419 2.46616   4 
   5 -17   1 23.4628 4.21465   2 
  -5 -17  -1 26.5087 5.16624   3 
  -5 -17  -1 20.8835 3.08370   4 
   5  17   1 28.4257 4.83057   2 
  -5  17  -1 32.8167 4.11382   3 
   5  17   1 24.5570 2.46250   4 
   5  17   1 29.6143 4.38245   3 
  -5  17  -1 31.3395 5.29336   2 
  -7 -17  -1 4.41930 2.58913   4 
  -7 -17  -1 1.66312 3.90854   3 
  -7 -17  -1 -2.2708 3.98110   2 
   7  17   1 0.66841 1.52562   4 
  -7  17  -1 1.50528 3.05634   3 
  -7  17  -1 -0.1462 4.30030   2 
   7  17   1 1.51178 4.30356   2 
   7  17   1 0.19107 2.87209   3 
  -9 -17  -1 3.22435 4.68629   2 
  -9 -17  -1 10.4861 2.91209   4 
  -9 -17  -1 10.2142 4.52785   3 
  -9  17  -1 1.53499 3.44951   3 
  -9  17  -1 -6.7821 3.95999   3 
   9  17   1 3.85520 4.82167   2 
   9  17   1 5.71370 1.95343   4 
  -9  17  -1 2.27964 4.99741   2 
   9  17   1 9.06497 3.62387   3 
 -11 -17  -1 3.58299 3.25041   4 
 -11 -17  -1 8.35293 5.32989   3 
 -11 -17  -1 -4.2707 5.09708   2 
 -11  17  -1 10.8704 5.97622   2 
  11  17   1 5.40317 4.03815   3 
  11  17   1 -0.6819 1.89337   4 
 -11  17  -1 3.15719 4.01750   3 
  11  17   1 3.86432 5.27312   2 
 -11  17  -1 -2.4405 4.67900   3 
 -13 -17  -1 -1.6660 5.24975   3 
 -13 -17  -1 -2.3050 3.91858   4 
 -13 -17  -1 9.01192 6.69792   2 
  13  17   1 4.57117 4.25694   3 
 -13  17  -1 4.72723 4.53689   3 
  13  17   1 3.07815 6.11372   2 
 -13  17  -1 -5.4683 5.33977   3 
 -13  17  -1 5.22849 6.90782   2 
  13  17   1 3.24589 2.63183   4 
 -13  17  -1 -10.263 4.58449   2 
 -15 -17  -1 5.20509 10.9942   3 
 -15 -17  -1 25.4850 8.31145   2 
 -15 -17  -1 15.5866 5.53099   4 
 -15  17  -1 19.5461 6.44345   2 
 -15  17  -1 12.3601 6.68049   3 
  15  17   1 7.36101 7.64286   2 
 -15  17  -1 2.95715 8.30529   2 
  15  17   1 19.0086 3.68467   4 
  15  17   1 28.3547 5.92598   3 
 -17 -17  -1 5.75176 8.57854   2 
 -17 -17  -1 -0.2260 5.07288   4 
 -17  17  -1 18.9775 7.50601   2 
 -17  17  -1 1.22019 7.89828   3 
 -17  17  -1 4.14328 6.87560   3 
 -17  17  -1 -0.0330 10.3324   2 
  17  17   1 4.78566 3.57552   4 
  17  17   1 4.55552 6.02896   3 
 -18 -18   1 65.5745 7.67156   4 
 -18 -18   1 64.8626 12.4337   2 
 -18  18   1 43.6211 12.2811   2 
 -18  18   1 71.3715 10.1345   2 
  18  18  -1 73.6777 8.99994   3 
 -18  18   1 54.3052 9.74702   3 
 -16 -18   1 63.5140 10.6379   2 
 -16 -18   1 48.4769 6.38037   4 
 -16  18   1 49.2254 9.46771   3 
  16  18  -1 39.3405 7.43708   3 
 -16  18   1 37.5865 9.17490   2 
 -16  18   1 51.7335 8.52165   3 
 -16  18   1 47.8160 10.0289   2 
 -14 -18   1 78.2858 7.99785   4 
 -14 -18   1 85.3972 9.91494   3 
 -14 -18   1 86.5783 10.9642   2 
 -14  18   1 90.8058 9.43044   2 
 -14  18   1 86.1311 9.74887   3 
  14  18  -1 87.8317 11.4818   2 
 -14  18   1 89.6594 9.68006   2 
 -14  18   1 89.7376 9.02221   3 
  14  18  -1 76.9983 8.09778   3 
 -12 -18   1 26.9336 7.91198   2 
 -12 -18   1 15.7818 6.10633   3 
 -12 -18   1 27.2003 4.19386   4 
 -12  18   1 24.6101 6.55356   3 
 -12  18   1 30.1518 5.60986   2 
 -12  18   1 20.6936 5.48732   3 
  12  18  -1 32.8243 5.52917   3 
 -12  18   1 22.3341 6.37150   2 
  12  18  -1 10.5787 7.01850   2 
 -10 -18   1 56.5508 7.84348   2 
 -10 -18   1 53.6256 5.34580   4 
 -10 -18   1 52.5686 6.94729   3 
 -10  18   1 59.6423 6.46026   3 
  10  18  -1 47.8172 7.83592   2 
  10  18  -1 66.5706 8.71228   3 
 -10  18   1 63.9240 7.48893   3 
 -10  18   1 59.6027 7.02763   2 
 -10  18   1 54.0094 6.83170   2 
  -8 -18   1 24.4672 3.15857   4 
  -8 -18   1 15.5862 5.21117   2 
  -8 -18   1 36.3513 5.76741   3 
  -8  18   1 21.8939 4.65515   3 
   8  18  -1 27.9006 4.63703   3 
  -8  18   1 25.9377 5.32661   2 
   8  18  -1 14.8084 5.71221   2 
  -6 -18   1 42.3930 5.64783   3 
  -6 -18   1 39.5851 4.17661   4 
  -6 -18   1 46.1294 6.22333   2 
   6 -18  -1 45.1797 3.84165   4 
  -6  18   1 47.0361 5.26279   3 
  -6  18   1 40.5281 2.54116   4 
   6  18  -1 39.2121 4.54651   3 
   6  18  -1 48.4446 6.55452   2 
  -6  18   1 45.7455 5.51051   2 
   4 -18  -1 71.5555 7.60776   3 
  -4 -18   1 73.7586 8.17534   2 
  -4 -18   1 76.3009 4.54605   4 
  -4 -18   1 73.5186 7.31977   3 
   4 -18  -1 71.6965 6.09022   2 
   4 -18  -1 67.9011 4.45245   4 
  -4  18   1 76.5832 6.44883   3 
  -4  18   1 73.3188 3.25428   4 
   4  18  -1 71.3829 8.07967   2 
  -4  18   1 66.6888 6.79588   2 
   4  18  -1 74.8455 6.05541   3 
  -2 -18   1 238.189 10.9433   2 
   2 -18  -1 216.118 9.29606   2 
  -2 -18   1 214.192 7.34632   4 
  -2 -18   1 234.061 10.3676   3 
   2 -18  -1 212.355 10.4425   3 
   2 -18  -1 224.127 7.78653   4 
  -2  18   1 213.657 9.45777   3 
  -2  18   1 219.903 6.53629   4 
  -2  18   1 220.877 9.85911   2 
   2  18  -1 237.109 11.3355   2 
   2  18  -1 208.705 9.13715   3 
   0 -18   1 295.204 11.6617   3 
   0 -18  -1 304.543 11.4780   2 
   0 -18  -1 330.345 12.4611   3 
   0 -18  -1 309.945 9.94095   4 
   0 -18   1 337.284 12.4576   2 
   0 -18   1 303.552 9.08215   4 
   0  18  -1 305.720 11.0582   3 
   0  18   1 306.558 8.66347   4 
   0  18   1 316.705 11.9022   2 
   0  18   1 309.656 11.4489   3 
   2 -18   1 181.064 6.26681   4 
   2 -18   1 192.890 9.70874   2 
  -2 -18  -1 182.805 9.15919   2 
   2 -18   1 184.510 9.09588   3 
  -2 -18  -1 205.798 10.0850   3 
   2  18   1 184.245 8.72315   3 
   2  18   1 190.115 6.22512   4 
  -2  18  -1 167.929 8.22426   3 
   2  18   1 196.251 9.56611   2 
  -4 -18  -1 84.9682 7.64004   2 
  -4 -18  -1 85.8800 7.71803   3 
   4 -18   1 72.7172 7.09614   2 
   4 -18   1 76.0435 3.82495   4 
   4 -18   1 77.3512 6.96427   3 
  -4 -18  -1 74.1615 5.25995   4 
   4  18   1 80.4108 6.51304   3 
  -4  18  -1 64.5404 8.01310   2 
  -4  18  -1 70.2185 6.19350   3 
   4  18   1 75.8314 7.72243   2 
   4  18   1 78.0692 4.15429   4 
   6 -18   1 230.157 10.4789   2 
  -6 -18  -1 233.990 11.5517   2 
   6 -18   1 224.672 6.63763   4 
  -6 -18  -1 229.267 8.78630   4 
  -6 -18  -1 233.002 11.2601   3 
   6  18   1 214.524 7.49091   4 
  -6  18  -1 221.211 9.68453   3 
  -6  18  -1 228.376 11.6281   2 
   6  18   1 228.837 11.5201   2 
   6  18   1 237.040 10.1686   3 
  -8 -18  -1 68.2398 6.08726   4 
  -8 -18  -1 78.6823 7.84935   2 
  -8 -18  -1 79.0799 8.57713   3 
   8  18   1 71.3067 4.44077   4 
  -8  18  -1 71.3478 7.02016   3 
   8  18   1 61.1747 7.26607   2 
   8  18   1 65.0724 6.95916   3 
  -8  18  -1 75.7128 7.71083   2 
 -10 -18  -1 80.6402 9.50543   3 
 -10 -18  -1 85.5595 6.99909   4 
 -10 -18  -1 77.6249 8.70756   2 
  10  18   1 87.8156 5.12330   4 
  10  18   1 79.5953 8.04434   3 
  10  18   1 87.8680 9.99687   2 
 -10  18  -1 96.5704 10.9987   2 
 -10  18  -1 94.5491 9.65900   3 
 -10  18  -1 76.6829 7.66589   3 
 -12 -18  -1 60.5373 8.25734   3 
 -12 -18  -1 67.9434 7.42664   4 
 -12  18  -1 61.2473 8.74274   2 
 -12  18  -1 54.5640 6.41823   3 
 -12  18  -1 59.3217 6.90687   2 
  12  18   1 52.1447 5.27096   4 
  12  18   1 54.5735 6.58395   3 
 -12  18  -1 56.0870 7.33091   3 
  12  18   1 66.2351 8.68785   2 
 -14 -18  -1 76.8080 8.70991   4 
 -14 -18  -1 40.2247 7.88662   3 
 -14 -18  -1 41.8298 8.89536   2 
  14  18   1 53.2585 5.95206   4 
 -14  18  -1 51.0992 7.53985   3 
 -14  18  -1 66.8216 9.85365   2 
 -14  18  -1 48.3555 7.80671   3 
  14  18   1 59.6049 7.22217   3 
  14  18   1 46.2579 9.44632   2 
 -16 -18  -1 55.6572 6.24014   4 
 -16 -18  -1 53.4682 10.8015   2 
 -16  18  -1 68.6285 8.54195   3 
 -16  18  -1 60.9549 8.69029   2 
 -16  18  -1 68.3945 9.14302   3 
  16  18   1 58.9639 6.89435   4 
 -16  18  -1 44.9070 11.1576   2 
  16  18   1 70.2193 8.24297   3 
 -17 -19   1 25.5414 6.24506   4 
 -17 -19   1 20.7159 10.4256   2 
 -17  19   1 11.5602 8.02326   2 
 -17  19   1 9.41069 10.7981   2 
  17  19  -1 18.1384 7.18527   3 
 -17  19   1 19.5694 8.74124   3 
 -15 -19   1 19.3280 9.02817   2 
 -15 -19   1 13.1806 4.88097   4 
 -15  19   1 23.5870 9.11434   2 
 -15  19   1 4.01638 8.25542   3 
 -15  19   1 26.7512 7.05847   2 
  15  19  -1 20.8076 6.52647   3 
 -15  19   1 21.8747 7.21483   3 
 -13 -19   1 25.8021 8.45660   2 
 -13 -19   1 37.8304 5.21610   4 
 -13 -19   1 22.9132 7.15860   3 
  13  19  -1 24.3457 8.79420   2 
 -13  19   1 29.2579 6.10732   2 
  13  19  -1 11.8424 5.18453   3 
 -13  19   1 24.2000 7.55676   3 
 -13  19   1 31.8165 7.84532   2 
 -13  19   1 31.5222 6.82647   3 
 -11 -19   1 60.2805 9.11735   2 
 -11 -19   1 58.7199 7.88236   3 
 -11 -19   1 59.6083 6.31811   4 
  11  19  -1 56.5315 9.03733   2 
 -11  19   1 61.3059 8.35809   3 
  11  19  -1 58.0649 6.50843   3 
 -11  19   1 68.3788 8.07973   2 
 -11  19   1 69.9615 7.93606   2 
 -11  19   1 68.2771 8.50262   3 
  -9 -19   1 1.73308 2.76478   4 
  -9 -19   1 -1.9358 5.08137   2 
  -9 -19   1 5.11764 4.99133   3 
   9  19  -1 -4.2140 6.33676   3 
  -9  19   1 -1.9204 4.06753   3 
   9  19  -1 9.14372 5.87001   2 
  -9  19   1 5.19867 5.18331   2 
  -7 -19   1 71.2527 7.68552   2 
  -7 -19   1 51.5917 6.46913   3 
   7 -19  -1 66.6234 4.17172   4 
  -7 -19   1 64.6261 5.16314   4 
   7  19  -1 64.3055 6.53085   3 
   7  19  -1 75.2184 7.93539   2 
  -7  19   1 82.1382 7.52568   3 
  -7  19   1 69.4144 6.94298   2 
   5 -19  -1 26.7552 3.21675   4 
  -5 -19   1 33.7552 5.95904   2 
   5 -19  -1 29.3879 4.21103   2 
  -5 -19   1 16.9929 4.88418   3 
  -5 -19   1 38.4668 4.21356   4 
   5  19  -1 35.7040 4.57664   3 
  -5  19   1 32.0764 2.57056   4 
   5  19  -1 34.9701 6.34000   2 
  -5  19   1 33.3538 4.83823   3 
  -5  19   1 26.0111 5.17455   2 
   3 -19  -1 8.99697 4.61485   3 
   3 -19  -1 18.0712 2.85673   4 
  -3 -19   1 11.6919 4.60514   3 
  -3 -19   1 21.6427 5.17218   2 
   3 -19  -1 12.7413 3.71720   2 
   3  19  -1 15.1667 5.26264   2 
  -3  19   1 17.3190 1.95019   4 
   3  19  -1 13.3824 3.44286   3 
  -3  19   1 19.5056 4.51390   2 
  -3  19   1 14.8824 3.90235   3 
  -1 -19   1 8.28102 4.33486   2 
   1 -19  -1 11.2782 2.70492   4 
   1 -19  -1 21.3827 4.26456   2 
  -1 -19   1 19.8483 4.66887   3 
  -1 -19   1 13.8170 2.94255   4 
   1 -19  -1 19.6944 4.61468   3 
  -1  19   1 11.6522 1.91133   4 
   1  19  -1 22.3774 5.10150   2 
   1  19  -1 12.5202 3.48265   3 
  -1  19   1 15.4546 4.01987   2 
  -1  19   1 9.86322 3.77747   3 
  -1 -19  -1 103.726 8.51042   3 
   1 -19   1 105.680 4.84057   4 
   1 -19   1 112.960 8.41485   2 
  -1 -19  -1 106.420 6.09147   4 
  -1 -19  -1 103.941 7.72087   2 
   1 -19   1 101.259 7.91343   3 
  -1  19  -1 111.550 7.11609   3 
   1  19   1 116.666 7.57995   3 
  -1  19  -1 89.1623 8.75776   2 
   1  19   1 96.4564 7.83038   2 
   1  19   1 100.207 4.52789   4 
   3 -19   1 47.3732 3.64392   4 
  -3 -19  -1 51.9898 6.29323   3 
   3 -19   1 41.3530 5.49779   2 
   3 -19   1 39.4084 5.31378   3 
  -3 -19  -1 57.4081 6.14281   2 
   3  19   1 48.1934 5.36600   3 
   3  19   1 39.5796 6.91827   2 
  -3  19  -1 48.2951 6.54085   2 
  -3  19  -1 47.5372 5.16523   3 
   3  19   1 44.5445 3.55404   4 
  -5 -19  -1 41.2550 5.97992   3 
   5 -19   1 30.9151 5.21537   2 
  -5 -19  -1 41.3537 5.97803   2 
  -5 -19  -1 36.5158 4.12994   4 
   5 -19   1 34.0441 3.35172   4 
   5  19   1 34.0476 5.85539   2 
  -5  19  -1 36.5210 6.10252   2 
   5  19   1 43.9541 5.16964   3 
  -5  19  -1 39.6745 4.99857   3 
  -7 -19  -1 -0.5894 4.09484   3 
  -7 -19  -1 2.80577 4.63905   2 
  -7 -19  -1 2.14677 2.91363   4 
  -7  19  -1 3.13851 3.50880   3 
  -7  19  -1 -3.3367 5.09469   2 
   7  19   1 5.68500 5.16429   2 
   7  19   1 4.11915 1.98295   4 
   7  19   1 3.38531 3.47171   3 
  -9 -19  -1 65.7725 6.38496   4 
  -9 -19  -1 55.4875 7.50031   2 
  -9 -19  -1 52.5046 7.07656   3 
  -9  19  -1 45.0570 5.69413   3 
  -9  19  -1 38.5083 6.51832   3 
   9  19   1 53.7120 4.55071   4 
   9  19   1 41.0621 7.29841   2 
  -9  19  -1 53.4082 7.74576   2 
   9  19   1 47.4778 5.78754   3 
 -11 -19  -1 23.7855 4.73828   4 
 -11 -19  -1 26.8990 6.90968   3 
 -11 -19  -1 22.8267 7.07946   2 
  11  19   1 34.0577 7.55104   2 
 -11  19  -1 21.0515 6.06621   3 
 -11  19  -1 18.3428 7.64123   2 
  11  19   1 38.3388 4.02234   4 
  11  19   1 32.9626 5.91256   3 
 -11  19  -1 28.3199 5.21234   3 
 -13 -19  -1 76.9489 10.0901   2 
 -13 -19  -1 70.7830 8.45387   4 
 -13 -19  -1 49.3659 8.53917   3 
 -13  19  -1 84.7608 8.97151   3 
  13  19   1 82.9382 10.7545   2 
  13  19   1 67.3831 7.68535   3 
  13  19   1 91.4414 6.51466   4 
 -13  19  -1 69.1123 8.18976   2 
 -13  19  -1 67.5467 10.0417   2 
 -13  19  -1 86.1244 9.39164   3 
 -15 -19  -1 27.8181 6.25735   4 
 -15 -19  -1 44.8042 9.93802   2 
 -15  19  -1 21.3443 10.4462   2 
 -15  19  -1 17.3558 6.53028   3 
 -15  19  -1 23.6174 7.39177   2 
  15  19   1 31.8894 9.22847   2 
  15  19   1 20.7025 6.44608   3 
 -15  19  -1 36.0807 8.51148   3 
  15  19   1 20.0336 4.16542   4 
 -17 -19  -1 21.2532 6.86850   4 
 -17  19  -1 54.5926 8.89740   3 
  17  19   1 22.1654 7.32874   3 
 -17  19  -1 31.9585 9.44180   2 
 -16 -20   1 25.7068 10.6961   2 
 -16 -20   1 27.3476 5.73921   4 
 -16  20   1 22.6415 10.8102   2 
 -16  20   1 11.3501 7.70829   3 
  16  20  -1 17.8927 6.90485   3 
 -16  20   1 33.6703 8.21767   2 
 -14 -20   1 28.6206 8.79622   2 
 -14 -20   1 18.1658 4.83981   4 
 -14  20   1 23.0434 8.64343   2 
  14  20  -1 -1.3474 14.5012   2 
  14  20  -1 7.13991 5.57343   3 
 -14  20   1 21.2085 9.24030   3 
 -14  20   1 17.0240 6.35157   2 
 -14  20   1 22.9863 6.80870   3 
 -12 -20   1 41.3090 8.48797   3 
 -12 -20   1 51.8234 8.95512   2 
 -12 -20   1 45.4628 6.18532   4 
  12  20  -1 30.4106 9.07539   2 
 -12  20   1 48.6365 7.02614   3 
 -12  20   1 49.2466 8.25890   2 
 -12  20   1 44.4999 8.59017   3 
  12  20  -1 42.8210 6.53455   3 
 -12  20   1 42.4477 6.61379   2 
 -10 -20   1 8.72803 6.37386   3 
 -10 -20   1 5.74816 3.63420   4 
 -10 -20   1 8.35676 6.50564   2 
  10  20  -1 6.31491 4.35886   3 
 -10  20   1 -8.0096 5.85032   2 
  10  20  -1 16.4241 7.19128   2 
  -8 -20   1 21.6299 5.87334   3 
  -8 -20   1 29.2374 6.67254   2 
  -8 -20   1 14.9629 3.39805   4 
  -8  20   1 19.6632 5.74847   2 
   8  20  -1 17.0795 6.26974   2 
  -8  20   1 19.3054 5.07176   3 
  -6 -20   1 10.1100 2.81794   4 
  -6 -20   1 0.15220 5.05274   2 
  -6 -20   1 7.78913 4.89570   3 
   6 -20  -1 10.3576 2.66759   4 
   6  20  -1 6.98986 3.68817   3 
  -6  20   1 12.6590 4.94736   2 
  -6  20   1 4.57053 3.84747   3 
   6  20  -1 13.3560 5.86860   2 
  -4 -20   1 42.4231 5.78764   3 
   4 -20  -1 49.3829 4.65856   4 
  -4 -20   1 44.6915 6.65691   2 
   4 -20  -1 44.6557 5.08865   2 
   4 -20  -1 47.4693 6.34067   3 
   4  20  -1 49.0252 6.76432   2 
  -4  20   1 47.1355 5.54549   3 
  -4  20   1 42.0575 3.14334   4 
  -4  20   1 52.8966 6.32339   2 
   4  20  -1 45.9228 5.12863   3 
  -2 -20   1 62.7090 7.09431   2 
   2 -20  -1 70.1230 7.01717   3 
  -2 -20   1 69.0187 8.12078   3 
   2 -20  -1 62.0667 6.85357   2 
  -2 -20   1 62.4192 4.76004   4 
   2 -20  -1 54.6677 4.91707   4 
  -2  20   1 65.7988 3.62614   4 
  -2  20   1 64.3933 6.59229   2 
   2  20  -1 63.4720 7.29475   2 
   2  20  -1 56.1759 6.12025   3 
  -2  20   1 61.2662 6.76098   3 
   0 -20   1 94.6613 8.80168   2 
   0 -20   1 114.240 5.38806   4 
   0 -20   1 111.561 8.67591   3 
   0 -20  -1 106.038 9.18984   3 
   0 -20  -1 115.475 8.24382   2 
   0 -20  -1 119.419 6.23967   4 
   0  20  -1 113.498 7.39463   3 
   0  20   1 101.952 8.70978   2 
   0  20  -1 109.019 9.77952   2 
   0  20   1 102.264 7.81461   3 
   0  20   1 106.860 4.78756   4 
   2 -20   1 16.4183 4.85052   2 
   2 -20   1 23.5139 5.19582   3 
  -2 -20  -1 15.1910 5.23744   3 
  -2 -20  -1 16.2887 4.83331   2 
  -2 -20  -1 12.9367 3.26664   4 
   2 -20   1 15.2256 2.54100   4 
  -2  20  -1 23.4742 4.26137   3 
   2  20   1 19.6889 2.53817   4 
  -2  20  -1 19.6584 5.80863   2 
   2  20   1 12.0851 4.00336   3 
  -4 -20  -1 113.795 9.37705   2 
  -4 -20  -1 115.497 9.40038   3 
   4 -20   1 102.723 4.96006   4 
   4 -20   1 96.3208 8.60863   3 
  -4 -20  -1 109.724 6.72180   4 
   4 -20   1 108.994 8.70054   2 
  -4  20  -1 106.350 7.43264   3 
   4  20   1 107.924 9.40409   2 
   4  20   1 100.469 5.10208   4 
  -4  20  -1 105.948 10.0498   2 
   4  20   1 107.036 8.01814   3 
   6 -20   1 126.049 9.32415   2 
   6 -20   1 126.560 5.22542   4 
  -6 -20  -1 117.799 9.98061   3 
  -6 -20  -1 123.237 7.29831   4 
  -6 -20  -1 128.190 10.3140   2 
   6  20   1 134.758 5.98276   4 
   6  20   1 133.319 14.3679   3 
  -6  20  -1 138.338 11.0519   2 
  -6  20  -1 137.482 8.41534   3 
   6  20   1 116.699 10.5215   2 
  -8 -20  -1 9.01187 5.68659   3 
  -8 -20  -1 12.3282 3.57542   4 
  -8 -20  -1 14.5268 5.79359   2 
  -8  20  -1 11.4009 4.09859   3 
   8  20   1 -6.9478 5.47694   2 
  -8  20  -1 5.55386 6.04774   2 
   8  20   1 8.37071 4.22925   3 
   8  20   1 5.64126 2.24044   4 
 -10 -20  -1 -2.9822 3.78501   4 
 -10 -20  -1 1.75989 5.91576   2 
 -10 -20  -1 1.41607 6.20969   3 
  10  20   1 6.63734 6.07075   2 
 -10  20  -1 -0.3558 5.60045   3 
 -10  20  -1 -0.7262 4.32396   3 
  10  20   1 1.71608 4.45373   3 
  10  20   1 -1.3178 2.40148   4 
 -10  20  -1 -5.5676 6.87036   2 
 -12 -20  -1 17.2471 8.05407   2 
 -12 -20  -1 14.0233 7.31424   3 
 -12 -20  -1 11.0172 4.61380   4 
  12  20   1 15.8768 3.69553   4 
 -12  20  -1 23.3304 5.96367   3 
  12  20   1 27.0281 6.30437   3 
 -12  20  -1 25.4606 8.71342   2 
 -12  20  -1 25.1093 6.33190   2 
 -12  20  -1 7.43338 6.70409   3 
  12  20   1 5.09892 8.21517   2 
 -14 -20  -1 32.7604 9.97857   2 
 -14 -20  -1 39.3510 5.72219   4 
 -14  20  -1 26.8537 10.0733   2 
 -14  20  -1 38.2293 7.00217   3 
  14  20   1 27.4941 9.50314   2 
 -14  20  -1 43.9725 8.85566   3 
  14  20   1 26.0332 6.62310   3 
  14  20   1 38.1258 4.84470   4 
 -14  20  -1 36.9278 7.69145   2 
 -16 -20  -1 12.7152 6.59626   4 
 -16 -20  -1 19.5532 10.5017   2 
 -16  20  -1 18.9762 11.7569   2 
 -16  20  -1 22.7100 9.19643   3 
 -16  20  -1 1.38194 7.29892   3 
 -16  20  -1 25.9586 8.43628   2 
  16  20   1 10.2152 6.85187   3 
 -15 -21   1 41.8490 6.51380   4 
 -15 -21   1 22.1197 10.6160   2 
 -15  21   1 28.0821 10.9494   2 
 -15  21   1 16.3114 7.76394   3 
 -15  21   1 12.9633 9.25407   2 
  15  21  -1 19.4419 6.90355   3 
 -13 -21   1 67.4552 10.9405   2 
 -13 -21   1 84.5959 8.56474   4 
  13  21  -1 61.1062 10.2318   2 
 -13  21   1 73.7676 8.20932   2 
 -13  21   1 58.2254 10.1224   3 
  13  21  -1 95.8970 11.1287   3 
 -13  21   1 72.4887 10.4199   2 
 -13  21   1 69.0400 8.81909   3 
 -11 -21   1 91.1392 10.5533   2 
 -11 -21   1 88.9067 7.82519   4 
 -11 -21   1 73.9944 9.47214   3 
 -11  21   1 110.008 10.3877   3 
  11  21  -1 93.9655 11.4874   2 
 -11  21   1 91.7771 9.55269   2 
 -11  21   1 86.7564 10.1270   3 
  11  21  -1 98.0724 10.0283   3 
 -11  21   1 87.6935 9.35202   2 
  -9 -21   1 19.4395 7.45455   2 
  -9 -21   1 26.6405 6.84078   3 
  -9 -21   1 21.8995 4.02661   4 
  -9  21   1 29.9346 6.73595   2 
   9  21  -1 33.4033 8.13403   2 
  -9  21   1 20.0748 5.51627   3 
   9  21  -1 28.9627 5.47645   3 
   7 -21  -1 25.8484 3.09990   4 
  -7 -21   1 21.7400 6.01479   3 
  -7 -21   1 31.0932 3.96777   4 
  -7 -21   1 33.1998 7.09418   2 
  -7  21   1 30.8857 6.11309   2 
   7  21  -1 12.8260 6.60722   2 
   7  21  -1 22.7893 4.83593   3 
  -7  21   1 15.3211 5.01913   3 
  -5 -21   1 134.076 6.97644   4 
   5 -21  -1 126.136 8.59123   2 
   5 -21  -1 139.379 6.52293   4 
  -5 -21   1 143.119 11.0547   2 
  -5 -21   1 119.669 9.85424   3 
   5  21  -1 139.110 8.70289   3 
  -5  21   1 129.516 9.20901   3 
   5  21  -1 151.105 12.1116   2 
   3 -21  -1 52.2620 5.19605   4 
   3 -21  -1 48.2959 6.78091   3 
  -3 -21   1 45.0741 5.02848   4 
   3 -21  -1 49.9897 5.79548   2 
  -3 -21   1 77.3027 9.04819   2 
  -3 -21   1 51.5546 6.89679   3 
  -3  21   1 53.7304 3.66256   4 
  -3  21   1 53.9685 6.22855   3 
   3  21  -1 57.8789 5.75439   3 
   3  21  -1 60.8630 7.68783   2 
  -3  21   1 54.7632 6.74470   2 
   1 -21  -1 77.4328 5.80734   4 
   1 -21  -1 86.3486 8.03236   2 
  -1 -21   1 76.0127 8.72795   3 
   1 -21  -1 87.0731 9.39357   3 
  -1 -21   1 84.9798 5.26405   4 
  -1 -21   1 84.7685 9.12098   2 
   1  21  -1 75.5037 7.09041   3 
  -1  21   1 83.1038 4.56883   4 
   1  21  -1 95.9685 10.1897   2 
  -1  21   1 92.8942 7.94705   3 
  -1 -21  -1 69.4922 8.01170   3 
   1 -21   1 75.1665 8.69890   3 
  -1 -21  -1 78.0438 5.83615   4 
   1 -21   1 73.3796 4.70276   4 
   1 -21   1 73.7827 8.63618   2 
  -1 -21  -1 70.2040 8.07836   2 
  -1  21  -1 70.4128 7.96739   2 
   1  21   1 73.0502 7.38802   2 
   1  21   1 74.3384 4.42243   4 
  -1  21  -1 77.1105 7.16889   3 
   1  21   1 66.0350 7.36587   3 
   3 -21   1 120.469 9.65221   3 
  -3 -21  -1 139.002 10.7603   3 
   3 -21   1 136.513 6.01916   4 
   3 -21   1 139.096 9.81590   2 
  -3 -21  -1 144.149 10.2971   2 
  -3  21  -1 153.692 11.6067   2 
   3  21   1 138.384 5.94554   4 
   3  21   1 133.855 10.4248   2 
  -3  21  -1 159.973 8.77607   3 
   3  21   1 144.656 9.21105   3 
  -5 -21  -1 87.4309 8.76133   3 
   5 -21   1 94.9115 8.97788   2 
   5 -21   1 86.8733 4.92150   4 
  -5 -21  -1 85.2167 6.75575   4 
  -5 -21  -1 85.2617 9.81438   2 
   5  21   1 71.4015 7.83280   3 
  -5  21  -1 85.9788 7.64342   3 
   5  21   1 91.2945 9.90189   2 
  -5  21  -1 88.5984 8.85101   2 
   5  21   1 90.4330 5.38899   4 
  -7 -21  -1 52.6200 5.50041   4 
  -7 -21  -1 37.3850 6.93859   3 
  -7 -21  -1 45.3412 7.29350   2 
   7  21   1 54.6678 8.04636   2 
  -7  21  -1 51.5692 8.17368   2 
   7  21   1 67.5936 7.84375   3 
  -7  21  -1 55.4638 6.15549   3 
   7  21   1 56.9519 4.78857   4 
  -9 -21  -1 41.3502 7.53860   3 
  -9 -21  -1 59.5648 7.10158   4 
  -9 -21  -1 56.5251 8.14164   2 
   9  21   1 47.7304 8.13257   2 
  -9  21  -1 63.0600 8.72141   2 
  -9  21  -1 40.6474 5.97414   3 
   9  21   1 50.6669 6.73824   3 
   9  21   1 53.1906 5.34645   4 
 -11 -21  -1 134.503 14.9760   3 
 -11 -21  -1 116.007 13.7244   2 
 -11 -21  -1 124.414 9.29859   4 
  11  21   1 117.066 14.0568   2 
  11  21   1 134.888 7.49134   4 
  11  21   1 129.967 11.0069   3 
 -11  21  -1 123.306 12.8196   3 
 -11  21  -1 126.617 11.6901   2 
 -11  21  -1 112.915 11.7226   3 
 -13 -21  -1 67.3596 10.8023   2 
 -13 -21  -1 51.3037 6.73349   4 
 -13  21  -1 59.6975 8.66416   2 
 -13  21  -1 62.4112 11.1145   2 
  13  21   1 44.9171 7.14068   3 
 -13  21  -1 48.0993 7.56558   3 
 -13  21  -1 58.4665 9.50567   3 
  13  21   1 59.1480 10.9577   2 
  13  21   1 77.5196 7.06594   4 
 -15 -21  -1 57.0519 7.32505   4 
 -15 -21  -1 73.9935 12.2232   2 
  15  21   1 52.0805 5.81004   4 
 -15  21  -1 50.2606 8.76213   3 
 -15  21  -1 46.9064 10.2549   3 
 -15  21  -1 80.5821 10.1872   2 
 -15  21  -1 56.9720 12.9952   2 
  15  21   1 58.1134 8.85337   3 
 -14 -22   1 5.28751 5.45975   4 
 -14 -22   1 9.06560 10.1470   2 
 -14  22   1 1.08203 7.74280   2 
  14  22  -1 -5.5520 6.06836   3 
 -14  22   1 10.3580 10.1070   2 
 -14  22   1 -1.7406 7.30527   3 
 -12 -22   1 11.2580 4.72719   4 
 -12 -22   1 12.9955 8.77218   2 
 -12  22   1 19.4198 6.63321   3 
 -12  22   1 6.76248 8.47568   3 
 -12  22   1 22.5195 6.31398   2 
  12  22  -1 16.3576 6.24154   3 
  12  22  -1 -3.5172 8.63650   2 
 -12  22   1 22.7939 8.80886   2 
 -10 -22   1 24.0940 8.11709   2 
 -10 -22   1 15.0297 8.15689   3 
 -10 -22   1 9.39224 3.94234   4 
 -10  22   1 7.62214 5.80404   3 
 -10  22   1 0.73966 6.86674   2 
  10  22  -1 -4.4966 8.72402   2 
  10  22  -1 9.05807 5.61799   3 
  -8 -22   1 6.27447 6.62049   2 
  -8 -22   1 11.7475 3.84960   4 
  -8 -22   1 6.66973 6.33040   3 
  -8  22   1 21.8710 6.81610   2 
  -8  22   1 17.0992 5.54717   3 
   8  22  -1 14.9711 7.64021   2 
   8  22  -1 10.8247 4.77988   3 
  -6 -22   1 15.9784 6.35347   3 
  -6 -22   1 10.1441 6.30262   2 
  -6 -22   1 4.71704 3.14498   4 
   6 -22  -1 2.49697 3.04075   4 
  -6  22   1 1.90978 5.69598   2 
   6  22  -1 7.13690 4.08920   3 
   6  22  -1 9.60589 6.67037   2 
  -6  22   1 -6.0743 5.25237   3 
   4 -22  -1 8.76662 5.85271   3 
  -4 -22   1 1.34163 5.59083   3 
  -4 -22   1 1.64701 3.49980   4 
   4 -22  -1 0.41166 2.83592   4 
  -4 -22   1 -2.0143 5.51418   2 
   4 -22  -1 -3.0589 4.24098   2 
   4  22  -1 5.85872 6.70992   2 
  -4  22   1 -0.6264 4.96554   3 
  -4  22   1 -2.6094 4.99184   2 
   4  22  -1 1.33495 3.93653   3 
  -2 -22   1 2.88326 3.48446   4 
   2 -22  -1 3.75038 5.16574   3 
   2 -22  -1 2.16162 2.78656   4 
  -2 -22   1 -4.3722 4.91492   2 
   2 -22  -1 7.04549 4.52944   2 
  -2 -22   1 14.3555 5.48968   3 
  -2  22   1 2.03819 2.08095   4 
   2  22  -1 5.58013 3.73981   3 
  -2  22   1 1.15355 4.26554   3 
   2  22  -1 1.55412 5.98875   2 
  -2  22   1 7.50599 4.98411   2 
   0 -22   1 -1.7398 4.90692   2 
   0 -22   1 0.16819 5.15983   3 
   0 -22  -1 3.30442 2.90485   4 
   0 -22   1 4.60624 2.46723   4 
   0 -22  -1 3.60995 5.66484   3 
   0 -22  -1 4.02505 4.63204   2 
   0  22  -1 -6.8678 3.39386   3 
   0  22   1 1.69933 2.14806   4 
   0  22   1 -5.2422 4.32142   3 
   0  22  -1 -2.0222 5.66784   2 
   0  22   1 -5.3492 4.89410   2 
   2 -22   1 -1.6145 5.06059   3 
   2 -22   1 6.07646 2.49585   4 
   2 -22   1 8.10711 5.20168   2 
  -2 -22  -1 1.10631 3.47360   4 
  -2 -22  -1 13.9174 5.40020   2 
  -2 -22  -1 8.38579 5.73668   3 
  -2  22  -1 18.5730 6.52460   2 
  -2  22  -1 7.04865 4.21177   3 
   2  22   1 1.95944 4.23026   3 
   2  22   1 -1.0806 5.21668   2 
   2  22   1 3.69287 2.43777   4 
  -4 -22  -1 2.36276 5.85569   3 
   4 -22   1 14.5097 4.92974   2 
  -4 -22  -1 5.10192 5.35918   2 
   4 -22   1 4.88012 5.38932   3 
   4 -22   1 3.29816 2.49425   4 
   4  22   1 4.98668 5.60217   2 
   4  22   1 5.51239 4.28306   3 
  -4  22  -1 5.41562 6.11088   2 
   4  22   1 2.21152 2.54972   4 
  -4  22  -1 1.40574 3.76003   3 
  -6 -22  -1 5.10183 3.71508   4 
  -6 -22  -1 9.19418 6.04362   2 
   6 -22   1 4.15529 5.09791   2 
  -6 -22  -1 -2.4413 6.40294   3 
   6 -22   1 -0.8129 2.33059   4 
  -6  22  -1 2.12774 6.75220   2 
   6  22   1 2.00605 2.58383   4 
   6  22   1 7.17507 6.07125   2 
  -6  22  -1 10.0022 4.34687   3 
   6  22   1 3.57117 4.36545   3 
  -8 -22  -1 30.0681 7.27074   2 
  -8 -22  -1 18.5650 4.59075   4 
  -8 -22  -1 22.3940 7.78497   3 
  -8  22  -1 17.1026 7.78452   2 
  -8  22  -1 26.4519 5.67546   3 
   8  22   1 22.1326 5.68579   3 
   8  22   1 27.6271 3.79414   4 
   8  22   1 23.9642 7.69302   2 
 -10 -22  -1 0.80476 7.25051   2 
 -10 -22  -1 5.50000 4.78838   4 
 -10  22  -1 7.84521 7.21334   3 
 -10  22  -1 11.4577 8.65320   3 
  10  22   1 18.1884 7.55317   2 
  10  22   1 -1.5656 5.21455   3 
 -10  22  -1 -9.4971 7.89028   2 
  10  22   1 4.42740 3.15090   4 
 -12 -22  -1 0.34434 7.93468   2 
 -12 -22  -1 3.60309 5.38900   4 
 -12  22  -1 10.1559 6.44382   2 
 -12  22  -1 -3.8591 7.76345   3 
  12  22   1 -8.8519 5.80632   3 
  12  22   1 8.45513 9.35207   2 
 -12  22  -1 -3.9393 9.66930   2 
  12  22   1 1.52719 3.53682   4 
 -12  22  -1 10.0041 6.12802   3 
 -14 -22  -1 6.25645 9.73539   2 
 -14 -22  -1 0.09036 6.19429   4 
  14  22   1 -1.9651 6.25004   3 
 -14  22  -1 8.99757 7.97420   2 
 -14  22  -1 -1.8652 9.10303   3 
  14  22   1 -6.2588 4.12747   4 
 -14  22  -1 2.52594 11.4167   2 
 -14  22  -1 -0.1900 6.81695   3 
 -13 -23   1 19.8634 10.9159   2 
 -13 -23   1 36.7557 7.46408   4 
  13  23  -1 33.0455 7.68432   3 
 -13  23   1 33.7206 7.59706   2 
 -13  23   1 22.7280 8.16860   3 
 -13  23   1 25.5372 10.6850   2 
 -11 -23   1 57.9097 6.63272   4 
 -11 -23   1 54.4198 11.0199   2 
 -11  23   1 62.3603 10.4862   3 
  11  23  -1 58.3251 7.86768   3 
 -11  23   1 39.8546 9.60192   2 
 -11  23   1 59.2601 7.60336   2 
  11  23  -1 28.6507 10.2929   2 
 -11  23   1 44.9405 7.81760   3 
  -9 -23   1 73.3076 10.0433   3 
  -9 -23   1 66.7520 7.83845   4 
  -9 -23   1 70.2955 10.2777   2 
  -9  23   1 63.0795 7.89482   3 
   9  23  -1 71.9600 11.2009   2 
   9  23  -1 70.9771 7.85257   3 
  -9  23   1 61.4356 9.12118   2 
  -7 -23   1 87.1511 9.40734   3 
  -7 -23   1 78.0042 10.0779   2 
   7 -23  -1 77.0618 5.35372   4 
  -7 -23   1 84.0943 7.51024   4 
  -7  23   1 89.9587 9.97561   3 
  -7  23   1 79.2750 8.78258   2 
   7  23  -1 100.909 10.9575   2 
   7  23  -1 96.4372 9.12925   3 
  -5 -23   1 99.1244 11.7139   3 
  -5 -23   1 78.5590 8.21426   4 
   5 -23  -1 76.6671 8.75990   2 
   5 -23  -1 85.1716 6.33956   4 
  -5 -23   1 119.375 12.1077   2 
  -5  23   1 67.6548 8.13369   2 
   5  23  -1 78.1069 8.36825   3 
   5  23  -1 84.2736 9.91844   2 
  -5  23   1 98.8081 9.45518   3 
  -3 -23   1 109.705 7.24460   4 
  -3 -23   1 104.908 10.9885   3 
   3 -23  -1 105.835 6.84596   4 
  -3 -23   1 96.4579 9.72254   2 
   3 -23  -1 124.644 9.61926   2 
   3 -23  -1 104.407 11.4073   3 
   3  23  -1 110.644 9.12552   3 
  -3  23   1 106.306 9.39421   3 
  -3  23   1 102.839 10.5981   2 
   3  23  -1 107.711 10.3918   2 
   1 -23  -1 49.5180 4.96635   4 
  -1 -23   1 59.8964 7.72168   2 
  -1 -23   1 53.8420 5.15331   4 
   1 -23  -1 45.6851 6.65136   2 
   1 -23  -1 53.5561 8.48032   3 
  -1 -23   1 46.8428 7.53545   3 
  -1  23   1 49.1976 6.68042   3 
  -1  23   1 59.0707 7.56126   2 
   1  23  -1 59.2039 6.74787   3 
   1  23  -1 57.9468 8.51359   2 
  -1  23   1 48.3546 4.47952   4 
   1 -23   1 106.008 10.0923   3 
  -1 -23  -1 99.3760 11.2547   3 
   1 -23   1 100.314 6.12641   4 
  -1 -23  -1 100.772 9.96835   2 
  -1 -23  -1 111.642 7.27230   4 
   1 -23   1 97.5743 10.5592   2 
  -1  23  -1 105.656 8.48336   3 
  -1  23  -1 87.2778 9.30681   2 
   1  23   1 98.2057 5.78320   4 
   1  23   1 100.509 10.7687   2 
   1  23   1 100.404 9.33102   3 
   3 -23   1 47.4895 4.83247   4 
  -3 -23  -1 37.7163 5.38283   4 
   3 -23   1 54.7587 7.11396   2 
   3 -23   1 44.1977 6.98992   3 
  -3 -23  -1 35.0903 7.82356   3 
  -3 -23  -1 48.3675 7.27328   2 
   3  23   1 43.6035 6.27243   3 
  -3  23  -1 42.0058 5.76635   3 
  -3  23  -1 40.1776 7.87358   2 
   3  23   1 43.5276 7.27217   2 
   3  23   1 48.3484 4.96072   4 
  -5 -23  -1 40.7176 5.48475   4 
  -5 -23  -1 29.9548 6.95012   2 
  -5 -23  -1 37.6803 8.05733   3 
   5 -23   1 41.3355 6.50360   2 
   5 -23   1 33.9314 3.72351   4 
   5  23   1 33.7404 7.28156   2 
  -5  23  -1 33.1329 7.65309   2 
  -5  23  -1 34.2647 5.60818   3 
   5  23   1 37.0025 6.27922   3 
   5  23   1 43.1773 4.35246   4 
  -7 -23  -1 16.2746 6.96960   2 
  -7 -23  -1 13.5035 4.81385   4 
  -7 -23  -1 16.5042 8.03769   3 
  -7  23  -1 9.22195 7.84011   2 
   7  23   1 3.29688 5.25813   3 
   7  23   1 15.5181 3.37196   4 
   7  23   1 14.2455 7.59276   2 
  -7  23  -1 12.0888 5.63022   3 
  -9 -23  -1 77.9559 9.08197   4 
  -9 -23  -1 75.7802 10.2901   2 
   9  23   1 70.8867 7.96580   3 
   9  23   1 71.4311 10.1175   2 
  -9  23  -1 91.1340 9.81561   3 
   9  23   1 92.7826 7.05571   4 
  -9  23  -1 74.7687 10.5951   2 
 -11 -23  -1 34.6577 6.77160   4 
 -11 -23  -1 36.8594 9.50766   2 
  11  23   1 32.8508 7.45067   3 
 -11  23  -1 42.3730 7.07926   3 
  11  23   1 47.0572 5.40441   4 
 -11  23  -1 40.3418 9.71225   3 
 -11  23  -1 39.0366 10.3380   2 
  11  23   1 33.4106 10.3221   2 
 -10 -24   1 15.0639 5.00617   4 
 -10 -24   1 10.1119 8.91186   2 
  10  24  -1 2.58115 10.2692   2 
  10  24  -1 -1.4822 5.73973   3 
 -10  24   1 -9.9093 8.36713   2 
 -10  24   1 8.61911 6.37979   3 
  -8 -24   1 -1.5897 4.39521   4 
  -8 -24   1 -0.6716 7.62911   3 
  -8 -24   1 5.97203 8.44670   2 
  -8  24   1 1.35761 5.74348   3 
   8  24  -1 2.09436 5.41892   3 
   8  24  -1 3.36631 9.25534   2 
  -8  24   1 2.77854 7.28137   2 
   6 -24  -1 19.5313 3.82013   4 
  -6 -24   1 23.9847 4.48235   4 
  -6 -24   1 23.7070 8.07256   2 
  -6 -24   1 16.4645 8.02445   3 
   6  24  -1 13.0720 5.29043   3 
  -6  24   1 23.5784 5.93382   3 
   6  24  -1 26.8849 8.74659   2 
  -6  24   1 23.9767 7.26735   2 
  -4 -24   1 7.05478 7.16290   3 
   4 -24  -1 14.0797 7.22215   3 
   4 -24  -1 19.9154 5.57322   2 
  -4 -24   1 8.27481 3.91946   4 
   4 -24  -1 24.3385 4.30753   4 
   4  24  -1 16.7221 5.41172   3 
  -4  24   1 23.3565 6.88556   2 
   4  24  -1 12.0684 7.94508   2 
  -4  24   1 6.45627 5.29422   3 
   2 -24  -1 81.3813 7.77361   2 
  -2 -24   1 83.6787 9.28866   3 
  -2 -24   1 82.6316 9.10024   2 
   2 -24  -1 80.0664 9.55661   3 
   2 -24  -1 66.7841 6.85412   4 
  -2 -24   1 72.6237 6.09464   4 
  -2  24   1 82.7459 9.75056   3 
  -2  24   1 71.8259 8.27372   2 
   2  24  -1 60.6141 9.03881   2 
   2  24  -1 75.1381 7.23746   3 
   0 -24   1 29.3722 6.98190   3 
   0 -24  -1 41.1273 6.94568   2 
   0 -24  -1 32.0332 4.61075   4 
   0 -24   1 12.3821 6.55856   2 
   0 -24  -1 30.0075 7.85138   3 
   0 -24   1 32.8863 4.12060   4 
   0  24   1 29.5737 3.68366   4 
   0  24  -1 32.8812 7.97460   2 
   0  24  -1 42.0950 6.20084   3 
   0  24   1 31.7288 7.01363   2 
   0  24   1 41.1345 6.22720   3 
   2 -24   1 16.1582 6.02048   2 
  -2 -24  -1 15.4561 4.09572   4 
   2 -24   1 16.0696 6.84669   3 
   2 -24   1 12.4024 3.23041   4 
  -2 -24  -1 14.0506 5.74571   2 
  -2 -24  -1 10.4633 7.68836   3 
   2  24   1 16.8342 3.36979   4 
  -2  24  -1 3.45420 7.13918   2 
   2  24   1 8.70406 6.71451   2 
   2  24   1 20.5594 5.52456   3 
  -2  24  -1 17.3434 6.04909   3 
   4 -24   1 12.6640 3.40582   4 
  -4 -24  -1 11.4142 6.41270   2 
  -4 -24  -1 -2.6200 4.28872   4 
   4 -24   1 3.47181 5.79917   2 
  -4 -24  -1 0.20863 7.50378   3 
   4  24   1 14.4713 6.93738   2 
  -4  24  -1 6.41435 7.47607   2 
  -4  24  -1 -3.3442 5.40289   3 
   4  24   1 5.33876 3.06285   4 
   4  24   1 6.47938 5.26315   3 
   6 -24   1 11.7958 3.08566   4 
   6 -24   1 4.53460 5.76307   2 
  -6 -24  -1 16.6663 8.17260   3 
  -6 -24  -1 14.8484 7.11665   2 
  -6 -24  -1 9.66052 5.09144   4 
  -6  24  -1 -2.7328 4.78756   3 
   6  24   1 6.09227 7.80841   2 
  -6  24  -1 -12.995 7.87653   2 
   6  24   1 6.17763 5.52672   3 
   6  24   1 3.37409 3.38591   4 
  -8 -24  -1 24.1887 5.94720   4 
  -8 -24  -1 14.7240 7.71504   2 
   8  24   1 19.2296 4.04877   4 
  -8  24  -1 6.57189 8.94463   2 
  -8  24  -1 17.0636 5.85015   3 
   8  24   1 10.6171 6.33942   3 
   8  24   1 19.2755 8.99023   2 
 -10 -24  -1 1.08426 8.75414   2 
 -10 -24  -1 2.59435 5.34323   4 
  10  24   1 0.15336 5.94380   3 
  10  24   1 7.00566 3.89626   4 
 -10  24  -1 4.65128 8.71849   3 
  10  24   1 7.16482 9.40486   2 
 -10  24  -1 4.65057 6.18877   3 
 -10  24  -1 -8.4565 9.74090   2 
  -9 -25   1 70.0764 11.8443   2 
  -9  25   1 70.0319 10.2428   2 
  -9  25   1 69.9353 8.78718   3 
   9  25  -1 80.9805 12.0183   2 
   9  25  -1 76.6495 8.68542   3 
  -7 -25   1 63.9672 6.59376   4 
   7 -25  -1 56.1279 6.41821   4 
  -7 -25   1 61.4918 10.3815   2 
   7  25  -1 51.6143 7.55804   3 
  -7  25   1 50.5938 7.88080   3 
   7  25  -1 55.3686 10.6295   2 
  -7  25   1 54.9845 9.18113   2 
   5 -25  -1 24.9278 4.64601   4 
  -5 -25   1 20.4550 8.31911   2 
  -5 -25   1 18.4646 8.58494   3 
  -5  25   1 23.2295 6.49673   3 
  -5  25   1 28.1132 7.86141   2 
   5  25  -1 29.1607 9.55614   2 
   5  25  -1 16.2160 5.53329   3 
   3 -25  -1 -4.1251 7.58841   3 
  -3 -25   1 7.56784 7.35811   3 
  -3 -25   1 10.9975 3.94289   4 
   3 -25  -1 -2.1455 5.50451   2 
  -3 -25   1 8.09871 7.10739   2 
   3 -25  -1 3.32407 4.02247   4 
   3  25  -1 13.9602 8.33331   2 
  -3  25   1 -7.9045 5.13947   3 
  -3  25   1 9.01175 7.06822   2 
   3  25  -1 -2.9728 4.71397   3 
   1 -25  -1 8.09382 6.03571   2 
  -1 -25   1 21.8169 7.21457   2 
   1 -25  -1 18.5111 4.24943   4 
   1 -25  -1 17.0501 8.05821   3 
  -1 -25   1 7.78580 7.42715   3 
  -1 -25   1 9.87698 3.65383   4 
  -1  25   1 24.1291 6.49080   3 
   1  25  -1 23.6465 8.58667   2 
   1  25  -1 17.0785 5.43597   3 
  -1  25   1 32.1979 7.41615   2 
  -1 -25  -1 0.10255 7.63270   3 
   1 -25   1 5.85142 3.40241   4 
  -1 -25  -1 0.29005 6.23889   2 
   1 -25   1 8.59411 7.32092   3 
  -1 -25  -1 11.6112 4.28132   4 
   1 -25   1 16.8673 6.56680   2 
  -1  25  -1 6.16497 8.54403   2 
   1  25   1 6.56622 5.87704   3 
  -1  25  -1 9.68775 5.04448   3 
   1  25   1 6.46828 6.86542   2 
  -3 -25  -1 -0.2171 6.11585   2 
   3 -25   1 3.46930 3.30818   4 
   3 -25   1 -12.221 6.77023   3 
  -3 -25  -1 3.20189 8.22275   3 
   3 -25   1 16.8125 6.54963   2 
  -3 -25  -1 2.21128 5.08714   4 
   3  25   1 9.92971 3.38324   4 
   3  25   1 -1.6172 7.29742   2 
  -3  25  -1 4.35355 7.74324   2 
  -3  25  -1 5.70714 5.26175   3 
   3  25   1 1.92059 5.48866   3 
   5 -25   1 7.33727 3.41868   4 
  -5 -25  -1 3.92600 7.28142   2 
   5 -25   1 9.03656 6.17480   2 
   5  25   1 1.51217 7.64594   2 
  -5  25  -1 9.73471 5.30512   3 
  -5  25  -1 -8.5074 8.25743   2 
   5  25   1 7.52541 3.66118   4 
   5  25   1 -2.1840 5.26242   3 
  -7 -25  -1 63.7715 7.25146   4 
  -7 -25  -1 66.8711 9.86504   2 
   7  25   1 75.1440 6.93387   4 
   7  25   1 62.4647 8.05654   3 
  -7  25  -1 57.9548 7.49177   3 
   7  25   1 67.4235 10.9519   2 
  -7  25  -1 52.0455 10.8600   2 
  -9 -25  -1 34.1006 9.84362   2 
   9  25   1 39.7273 7.89589   3 
   9  25   1 45.3889 10.9109   2 
  -9  25  -1 48.3200 7.78658   3 
  -9  25  -1 58.7546 11.9870   2 
   9  25   1 31.7892 5.01346   4 
   6 -26  -1 25.2339 4.54153   4 
  -6 -26   1 9.32465 9.31959   2 
  -6 -26   1 21.8000 5.00757   4 
  -6  26   1 29.6413 8.96736   2 
   6  26  -1 23.8833 6.40714   3 
  -6  26   1 21.7461 6.87615   3 
   6  26  -1 6.40542 10.4008   2 
  -4 -26   1 23.7439 8.99717   2 
  -4 -26   1 25.4661 9.34136   3 
   4 -26  -1 33.0435 5.39488   4 
  -4 -26   1 27.8192 5.67855   4 
   4 -26  -1 22.3867 6.72004   2 
  -4  26   1 30.0365 8.45262   2 
   4  26  -1 42.5654 7.29230   3 
  -4  26   1 29.2228 6.93643   3 
   4  26  -1 30.3395 10.3023   2 
   2 -26  -1 17.5004 6.58427   2 
  -2 -26   1 11.8268 8.76145   3 
  -2 -26   1 -0.5442 7.73031   2 
  -2 -26   1 18.2947 4.51331   4 
   2 -26  -1 18.2675 4.82136   4 
   2 -26  -1 14.5391 8.57061   3 
  -2  26   1 11.8076 6.43554   3 
   2  26  -1 -8.3246 8.88738   2 
   2  26  -1 20.6841 6.20345   3 
  -2  26   1 12.1532 8.12092   2 
   0 -26   1 33.8186 4.89213   4 
   0 -26  -1 34.6567 9.73069   3 
   0 -26  -1 42.6946 5.62864   4 
   0 -26   1 35.9981 8.79146   3 
   0 -26   1 34.1883 8.30973   2 
   0 -26  -1 39.0776 7.83244   2 
   0  26  -1 45.3202 6.85316   3 
   0  26   1 33.1403 8.58069   2 
   0  26  -1 41.6843 9.67730   2 
   0  26   1 37.9490 7.84940   3 
   2 -26   1 36.8934 9.13816   3 
   2 -26   1 40.2843 4.80102   4 
  -2 -26  -1 28.8438 5.36343   4 
  -2 -26  -1 28.8664 7.94289   2 
   2 -26   1 33.7099 9.64750   2 
  -2  26  -1 53.6026 10.0391   2 
   2  26   1 28.9150 8.74545   2 
   2  26   1 17.6143 6.73858   3 
  -2  26  -1 47.9367 6.91735   3 
  -4 -26  -1 27.3139 6.33135   4 
   4 -26   1 22.8443 8.56781   2 
  -4 -26  -1 38.1520 8.58990   2 
   4 -26   1 29.7319 4.55783   4 
   4  26   1 26.4684 8.89545   2 
   4  26   1 20.6496 6.48152   3 
  -4  26  -1 37.4556 9.93118   2 
  -4  26  -1 19.7706 6.46339   3 
   6 -26   1 37.5159 5.24566   4 
  -6 -26  -1 51.6668 10.2387   4 
  -6 -26  -1 28.3222 9.19740   2 
   6  26   1 37.5726 7.31741   3 
  -6  26  -1 44.8643 7.16836   3 
   6  26   1 31.8364 10.3591   2 
  -6  26  -1 58.4008 11.3254   2 
  -3 -27   1 -10.571 8.12889   2 
  -3 -27   1 -1.3182 4.28850   4 
   3 -27  -1 0.04068 4.92595   4 
   3 -27  -1 14.6186 6.83764   2 
  -3  27   1 15.6045 9.00015   2 
   3  27  -1 1.69565 6.12213   3 
  -3  27   1 -6.8749 6.39183   3 
   3  27  -1 4.67739 10.4560   2 
  -1 -27   1 -3.9348 8.70136   3 
   1 -27  -1 5.89496 6.99545   2 
  -1 -27   1 1.98667 8.00460   2 
   1 -27  -1 0.55446 4.90185   4 
  -1 -27   1 2.87534 4.35449   4 
  -1  27   1 -9.4458 8.20470   2 
   1  27  -1 9.01260 6.27760   3 
  -1  27   1 2.89892 6.39658   3 
   1  27  -1 -0.9378 9.60387   2 
   1 -27   1 0.90152 7.65014   2 
   1 -27   1 8.66656 4.41005   4 
  -1 -27  -1 12.7081 7.12926   2 
   1 -27   1 15.8099 9.28766   3 
  -1 -27  -1 4.08563 5.05392   4 
  -1  27  -1 8.98002 9.75786   2 
   1  27   1 8.26767 6.66318   3 
   1  27   1 17.9862 8.92301   2 
  -1  27  -1 6.59963 6.00094   3 
   3 -27   1 10.0437 4.37023   4 
   3 -27   1 8.57888 9.20728   3 
  -3 -27  -1 8.34813 5.77699   4 
   3 -27   1 -10.790 7.09785   2 
   3  27   1 5.49622 9.16619   2 
   3  27   1 12.0669 6.74567   3 
  -3  27  -1 13.7898 10.1970   2 
  -3  27  -1 10.6924 6.36914   3 
  22   0  -2 5.90701 7.24272   3 
 -22   0   2 7.00998 8.54585   2 
  20   0  -2 7.11073 5.52334   3 
  20   0  -2 -1.6967 6.93205   2 
 -20   0   2 0.67393 2.64903   4 
 -20   0   2 -0.5522 5.56154   3 
 -20   0   2 9.81632 6.98770   2 
  18   0  -2 101.427 10.0330   2 
 -18   0   2 126.876 10.9923   2 
 -18   0   2 109.894 5.15353   4 
 -18   0   2 108.559 8.96830   3 
  16   0  -2 710.945 21.4726   2 
  16   0  -2 707.484 21.0587   3 
 -16   0   2 706.832 17.1775   4 
 -16   0   2 679.475 20.3220   3 
 -16   0   2 697.717 22.1713   2 
  14   0  -2 26.2774 4.13947   3 
 -14   0   2 26.6980 4.02117   3 
 -14   0   2 29.1389 2.41874   4 
  14   0  -2 28.5817 4.81175   2 
 -14   0   2 27.1751 4.53669   2 
 -12   0   2 599.257 18.1722   2 
 -12   0   2 611.392 17.1298   3 
 -12   0   2 622.046 14.7397   4 
  12   0  -2 625.417 17.9770   2 
  12   0  -2 625.816 17.5597   3 
  10   0  -2 87.7715 5.32821   2 
 -10   0   2 90.1986 5.54832   2 
 -10   0   2 90.5902 4.83640   3 
  10   0  -2 85.8537 4.95173   3 
 -10   0   2 89.7316 3.12394   4 
  -8   0   2 1077.09 24.8286   4 
   8   0  -2 1109.56 26.7803   2 
   8   0  -2 1094.80 26.5396   3 
  -8   0   2 1092.80 27.0208   2 
  -8   0   2 1108.59 26.3515   3 
  -6   0   2 2073.79 47.9158   3 
  -6   0   2 2121.43 48.4177   2 
   6   0  -2 2113.38 48.0845   3 
   6   0  -2 2172.26 48.3481   2 
  -4   0   2 418.960 10.7129   2 
   4   0  -2 406.443 10.4990   3 
   4   0  -2 419.623 10.7143   2 
  -2   0   2 498.990 11.6990   3 
  -2   0   2 497.495 11.8727   4 
  -2   0   2 504.903 11.8291   2 
   2   0  -2 456.064 12.1779   3 
   2   0  -2 514.856 11.8552   2 
   0   0  -2 0.34519 0.61519   2 
   0   0   2 1.52107 0.67152   2 
   0   0  -2 0.69806 0.71582   4 
   0   0  -2 -0.2775 0.40200   3 
   0   0   2 0.73568 0.45600   3 
   0   0   2 0.85818 0.73067   4 
  -2   0  -2 3008.26 66.1787   4 
   2   0   2 2997.60 66.0894   4 
  -4   0  -2 418.679 10.4048   4 
   4   0   2 430.621 10.3277   3 
   4   0   2 426.520 10.1969   4 
  -4   0  -2 421.366 11.0190   2 
  -4   0  -2 428.368 10.3192   3 
  -6   0  -2 1507.64 33.4759   3 
  -6   0  -2 1433.70 33.1350   4 
   6   0   2 1467.18 33.4983   3 
  -6   0  -2 1487.86 34.3660   2 
   6   0   2 1441.71 32.7460   4 
   6   0   2 1471.80 34.2908   2 
   8   0   2 19.8011 2.79810   2 
   8   0   2 12.6997 1.86550   3 
  -8   0  -2 18.3572 2.28310   3 
  -8   0  -2 10.1167 2.15634   2 
   8   0   2 13.4903 1.35651   4 
  -8   0  -2 16.9612 1.71297   4 
  10   0   2 557.544 14.7495   3 
 -10   0  -2 526.394 15.6693   2 
  10   0   2 543.380 12.9399   4 
 -10   0  -2 547.443 14.5483   3 
 -10   0  -2 536.906 13.6464   4 
  10   0   2 537.486 15.6962   2 
  12   0   2 276.738 9.47453   3 
  12   0   2 278.740 7.29460   4 
 -12   0  -2 275.655 10.7377   2 
 -12   0  -2 274.355 9.29433   3 
  12   0   2 259.434 10.8499   2 
  14   0   2 374.040 9.78481   4 
 -14   0  -2 379.415 14.1231   2 
  14   0   2 383.294 13.9338   2 
  14   0   2 380.248 12.6476   3 
 -14   0  -2 374.593 12.3217   3 
 -14   0  -2 376.966 11.0276   4 
 -16   0  -2 187.186 9.28481   3 
  16   0   2 191.654 11.0185   2 
 -16   0  -2 194.108 7.68679   4 
 -16   0  -2 175.427 11.0356   2 
  16   0   2 211.174 9.59589   3 
  16   0   2 206.872 6.34008   4 
  18   0   2 395.608 10.9579   4 
 -18   0  -2 368.134 14.1861   3 
  18   0   2 399.808 14.9291   3 
  18   0   2 389.428 17.0915   2 
 -18   0  -2 390.524 16.8922   2 
 -18   0  -2 377.330 12.4612   4 
 -20   0  -2 132.571 8.82790   4 
  20   0   2 142.595 11.3989   3 
 -20   0  -2 154.417 13.8390   2 
 -20   0  -2 144.399 11.3317   3 
  22   0   2 58.1011 8.85192   3 
 -22   0  -2 53.2049 10.0995   2 
 -23  -1   2 19.9809 9.77527   2 
  23  -1  -2 0.65802 7.55111   3 
  23   1  -2 7.54100 7.28384   3 
 -23   1   2 13.2844 9.62346   2 
 -21  -1   2 -0.9171 6.16954   3 
 -21  -1   2 17.1161 8.27168   2 
  21  -1  -2 1.56708 6.32876   3 
 -21  -1   2 7.52490 3.31299   4 
  21  -1  -2 8.70883 7.83844   2 
 -21   1   2 5.03923 3.16174   4 
  21   1  -2 2.62168 5.99063   3 
 -21   1   2 0.47223 8.04289   2 
  21   1  -2 14.0729 8.34635   2 
 -21   1   2 11.8194 6.71958   3 
 -19  -1   2 -1.8671 5.09022   3 
 -19  -1   2 4.31797 5.97494   2 
  19  -1  -2 8.29552 6.32830   2 
 -19  -1   2 -0.0005 2.18950   4 
  19  -1  -2 1.92454 4.86333   3 
  19   1  -2 6.05315 4.79818   3 
 -19   1   2 3.61028 4.88677   3 
  19   1  -2 8.48860 5.95213   2 
 -19   1   2 2.07729 2.22731   4 
 -19   1   2 4.17815 6.13940   2 
 -17  -1   2 68.1882 6.62108   3 
 -17  -1   2 52.3063 6.93249   2 
 -17  -1   2 57.6065 3.94549   4 
  17  -1  -2 62.6706 6.73492   3 
  17  -1  -2 56.9901 6.67042   2 
  17   1  -2 56.9050 6.46304   3 
 -17   1   2 70.2975 7.59225   3 
  17   1  -2 61.5785 7.45061   2 
 -17   1   2 64.2855 3.76754   4 
 -17   1   2 55.6477 7.13533   2 
  15  -1  -2 -1.0306 2.88951   3 
 -15  -1   2 4.29188 3.01728   3 
 -15  -1   2 0.25758 3.82719   2 
 -15  -1   2 -1.2227 1.30874   4 
  15  -1  -2 1.14093 3.72133   2 
 -15   1   2 -2.3936 3.01331   3 
 -15   1   2 6.11611 3.68849   2 
 -15   1   2 0.61259 1.27327   4 
  15   1  -2 -4.0753 2.74957   3 
  15   1  -2 -7.7656 3.63076   2 
 -13  -1   2 283.056 10.1095   3 
 -13  -1   2 276.508 7.60970   4 
  13  -1  -2 293.734 10.6387   3 
  13  -1  -2 268.483 11.0697   2 
 -13  -1   2 283.097 11.4418   2 
 -13   1   2 278.525 10.1204   3 
  13   1  -2 249.208 12.0585   2 
  13   1  -2 269.325 10.2120   3 
 -13   1   2 275.420 10.9958   2 
 -13   1   2 278.699 7.40592   4 
  11  -1  -2 64.0034 4.82204   3 
 -11  -1   2 74.0349 4.77950   3 
  11  -1  -2 69.5790 5.28357   2 
 -11  -1   2 62.9516 5.57449   2 
 -11  -1   2 69.6275 2.89170   4 
  11   1  -2 62.3316 4.61278   3 
 -11   1   2 70.8846 2.71284   4 
 -11   1   2 69.1935 4.65788   3 
  11   1  -2 66.9208 5.40957   2 
 -11   1   2 69.4601 5.34871   2 
  -9  -1   2 0.99635 0.82216   4 
  -9  -1   2 1.64988 1.68903   3 
   9  -1  -2 0.37268 1.87006   2 
  -9  -1   2 1.10038 2.10602   2 
   9  -1  -2 1.39578 1.72430   3 
  -9   1   2 1.37537 0.83254   4 
   9   1  -2 2.17459 1.66476   3 
  -9   1   2 0.32916 1.61456   3 
   9   1  -2 -2.0897 1.78763   2 
  -9   1   2 -1.2916 1.76433   2 
   7  -1  -2 2.97354 1.49498   2 
  -7  -1   2 3.68293 1.83023   2 
  -7  -1   2 3.54173 1.49612   3 
   7  -1  -2 1.68617 1.37364   3 
   7   1  -2 3.40955 1.74085   2 
   7   1  -2 3.13929 1.24372   3 
  -7   1   2 3.18467 1.49309   3 
  -7   1   2 0.79374 1.44898   2 
  -5  -1   2 848.023 20.3787   3 
   5  -1  -2 864.425 20.6833   3 
  -5  -1   2 857.964 20.9852   2 
   5  -1  -2 875.707 20.5899   2 
  -5   1   2 876.425 20.6276   3 
   5   1  -2 855.102 20.5091   3 
  -5   1   2 881.035 20.7330   2 
   5   1  -2 864.182 20.9903   2 
  -3  -1   2 3983.35 87.4901   2 
   3  -1  -2 3946.63 87.2619   3 
  -3   1   2 4003.05 87.2423   3 
  -3   1   2 3947.84 87.0076   2 
   3   1  -2 3931.16 87.4402   2 
   1  -1  -2 321.355 7.69565   2 
  -1  -1   2 327.543 7.63547   3 
  -1  -1   2 321.029 8.17001   4 
   1  -1  -2 343.455 8.24680   4 
  -1  -1   2 317.083 8.27578   2 
   1   1  -2 319.682 8.23179   2 
   1   1  -2 318.672 7.65595   3 
  -1   1   2 331.516 7.98435   3 
  -1   1   2 336.540 7.71994   2 
  -1  -1  -2 1151.92 26.0928   4 
   1  -1   2 1141.04 26.7785   2 
  -1  -1  -2 1156.11 25.7012   3 
   1   1   2 1136.56 26.0101   4 
  -1   1  -2 1175.30 26.1963   2 
  -1   1  -2 1162.62 26.0359   4 
   1   1   2 1136.58 25.6694   3 
   3  -1   2 1336.58 30.3418   4 
  -3  -1  -2 1359.22 30.5839   4 
  -3  -1  -2 1403.16 30.9067   2 
   3  -1   2 1351.41 30.1213   3 
  -3  -1  -2 1364.86 30.4161   3 
   3   1   2 1349.81 30.3806   3 
   3   1   2 1358.72 30.8378   2 
  -3   1  -2 1382.03 30.5073   4 
   3   1   2 1320.20 30.3842   4 
  -3   1  -2 1337.71 30.0866   3 
  -5  -1  -2 12.6569 1.47881   3 
   5  -1   2 15.6023 1.30331   4 
  -5  -1  -2 14.3545 1.65223   4 
   5  -1   2 15.0133 1.57252   3 
  -5  -1  -2 13.3011 1.77659   2 
  -5   1  -2 15.7033 1.63098   4 
   5   1   2 16.0518 1.70948   3 
  -5   1  -2 15.1882 1.67188   3 
   5   1   2 19.0163 2.22415   2 
   5   1   2 15.8716 1.35494   4 
  -5   1  -2 16.2793 2.05547   2 
   7  -1   2 230.942 6.97185   3 
  -7  -1  -2 245.898 7.16019   3 
  -7  -1  -2 237.654 7.97128   2 
  -7  -1  -2 238.683 6.66686   4 
   7  -1   2 225.518 5.95627   4 
   7   1   2 238.407 7.85887   2 
   7   1   2 242.603 6.16763   4 
  -7   1  -2 225.969 6.88852   3 
  -7   1  -2 220.779 6.45095   4 
   7   1   2 240.769 7.09113   3 
  -7   1  -2 235.829 7.85529   2 
   9  -1   2 395.050 10.9960   3 
   9  -1   2 381.240 9.38200   4 
  -9  -1  -2 380.717 10.2083   4 
   9  -1   2 401.266 12.0305   2 
  -9  -1  -2 372.852 11.9695   2 
  -9  -1  -2 388.819 10.9511   3 
  -9   1  -2 396.659 10.8733   3 
  -9   1  -2 395.591 10.1181   4 
   9   1   2 403.753 12.0009   2 
   9   1   2 378.773 9.56399   4 
  -9   1  -2 376.510 11.8726   2 
   9   1   2 378.987 10.9512   3 
 -11  -1  -2 207.267 7.56192   3 
  11  -1   2 208.153 5.65847   4 
 -11  -1  -2 219.113 6.73024   4 
  11  -1   2 193.465 7.51538   3 
  11  -1   2 206.683 8.78925   2 
 -11  -1  -2 208.040 8.76016   2 
 -11   1  -2 203.297 7.43976   3 
  11   1   2 209.404 7.68242   3 
 -11   1  -2 207.809 6.55070   4 
 -11   1  -2 200.487 8.67036   2 
  11   1   2 207.464 5.83270   4 
  11   1   2 200.709 8.71161   2 
  13  -1   2 215.857 8.52382   3 
 -13  -1  -2 206.146 9.70288   2 
  13  -1   2 218.453 9.86159   2 
  13  -1   2 212.154 5.94760   4 
 -13  -1  -2 206.347 7.15738   4 
 -13   1  -2 211.175 7.06109   4 
  13   1   2 213.388 9.92063   2 
  13   1   2 217.152 6.14868   4 
 -13   1  -2 199.646 8.11085   3 
 -13   1  -2 205.542 9.71730   2 
  13   1   2 192.150 8.25785   3 
 -15  -1  -2 -0.7792 3.51991   2 
 -15  -1  -2 2.00222 3.11613   3 
  15  -1   2 1.42949 3.89270   2 
 -15  -1  -2 2.99131 2.29119   4 
  15  -1   2 2.72041 1.21127   4 
  15  -1   2 3.85273 2.90381   3 
  15   1   2 2.67161 1.28193   4 
  15   1   2 7.96134 4.41741   2 
 -15   1  -2 -2.4419 3.51916   2 
 -15   1  -2 4.09282 3.12960   3 
 -15   1  -2 0.39262 2.08417   4 
  15   1   2 1.55081 3.07239   3 
  17  -1   2 75.8895 4.03492   4 
  17  -1   2 71.9280 7.23933   3 
 -17  -1  -2 67.2168 5.78925   4 
 -17  -1  -2 80.1657 9.33734   2 
 -17  -1  -2 73.6985 7.58051   3 
 -17   1  -2 72.6510 8.11395   2 
  17   1   2 85.0838 9.75003   2 
 -17   1  -2 57.1887 5.39303   4 
 -17   1  -2 79.9043 7.53770   3 
  17   1   2 74.4994 7.34686   3 
  17   1   2 71.7724 4.01860   4 
 -19  -1  -2 2.55089 4.92244   3 
 -19  -1  -2 9.47421 3.92572   4 
 -19  -1  -2 1.65905 6.42558   2 
  19  -1   2 3.35865 4.93613   3 
 -19   1  -2 8.61343 6.39604   2 
 -19   1  -2 6.15694 3.84058   4 
  19   1   2 0.78733 4.82974   3 
 -19   1  -2 14.0126 4.99643   3 
  19   1   2 2.41050 6.65678   2 
 -21  -1  -2 11.8846 7.46201   2 
 -21  -1  -2 15.1883 6.38659   3 
  21  -1   2 16.9762 6.65734   3 
  21   1   2 25.2810 6.88780   3 
 -21   1  -2 20.4049 6.90171   3 
 -21   1  -2 10.2018 8.30545   2 
 -23  -1  -2 23.5962 10.1450   2 
  23  -1   2 -1.3023 8.02513   3 
  23   1   2 -4.0347 7.68363   3 
 -23   1  -2 8.46196 9.74115   2 
 -22  -2   2 36.5418 9.78090   2 
  22  -2  -2 61.8802 8.90515   3 
  22   2  -2 65.4531 8.89656   3 
 -22   2   2 61.9706 10.4727   2 
 -20  -2   2 7.51323 7.22341   2 
  20  -2  -2 3.76143 7.08916   2 
 -20  -2   2 -3.0035 5.65924   3 
 -20  -2   2 7.66567 2.92441   4 
  20  -2  -2 7.32578 5.77870   3 
 -20   2   2 5.96347 2.69462   4 
 -20   2   2 2.07730 6.80745   2 
  20   2  -2 8.73863 5.71409   3 
 -20   2   2 11.8702 6.13647   3 
  20   2  -2 0.16023 6.78906   2 
 -18  -2   2 231.772 7.91960   4 
 -18  -2   2 226.320 11.3319   3 
  18  -2  -2 235.902 12.8415   2 
 -18  -2   2 262.812 15.9112   2 
 -18   2   2 235.230 11.8012   3 
 -18   2   2 230.329 7.46090   4 
  18   2  -2 226.834 12.3455   3 
  18   2  -2 229.507 13.2654   2 
 -18   2   2 241.100 13.0354   2 
 -16  -2   2 249.863 10.4806   3 
 -16  -2   2 230.267 12.1654   2 
  16  -2  -2 235.274 11.4424   2 
  16  -2  -2 241.471 10.9922   3 
 -16  -2   2 238.428 7.46288   4 
  16   2  -2 229.017 10.7904   3 
  16   2  -2 221.016 11.6502   2 
 -16   2   2 242.962 10.7042   3 
 -16   2   2 234.982 7.02459   4 
 -16   2   2 230.633 11.5842   2 
 -14  -2   2 670.937 20.5622   2 
  14  -2  -2 669.218 19.4683   3 
  14  -2  -2 689.367 19.6027   2 
 -14  -2   2 670.629 16.2048   4 
 -14  -2   2 651.284 18.7044   3 
 -14   2   2 632.955 18.7618   3 
  14   2  -2 667.901 20.0442   2 
 -14   2   2 661.490 15.8062   4 
 -14   2   2 662.953 19.9727   2 
  14   2  -2 653.744 19.1839   3 
 -12  -2   2 11.8196 3.26384   2 
  12  -2  -2 9.75911 2.91358   3 
 -12  -2   2 11.5340 1.53732   4 
 -12  -2   2 12.1956 2.80057   3 
  12  -2  -2 11.5930 3.17529   2 
  12   2  -2 13.1953 2.89657   3 
  12   2  -2 15.0667 3.29255   2 
 -12   2   2 12.6075 3.17522   2 
 -12   2   2 13.1280 2.94025   3 
 -12   2   2 10.1358 1.37777   4 
  10  -2  -2 91.4002 5.24211   3 
 -10  -2   2 101.861 6.08651   2 
 -10  -2   2 99.0035 3.41851   4 
 -10  -2   2 95.3576 5.04338   3 
  10  -2  -2 83.2797 5.31522   2 
  10   2  -2 92.1451 4.97554   3 
 -10   2   2 100.046 3.20187   4 
 -10   2   2 95.1991 5.17448   3 
 -10   2   2 98.7894 5.52679   2 
  10   2  -2 92.3013 5.88676   2 
  -8  -2   2 209.979 7.03867   3 
   8  -2  -2 217.432 7.28784   2 
  -8  -2   2 211.575 5.80955   4 
  -8  -2   2 208.033 7.93370   2 
   8  -2  -2 223.138 7.49815   3 
  -8   2   2 214.562 7.30938   3 
  -8   2   2 219.861 7.47686   2 
   8   2  -2 212.455 7.95009   2 
   6  -2  -2 2.59973 1.30376   2 
  -6  -2   2 1.16616 1.11455   3 
   6  -2  -2 1.12082 1.25479   3 
  -6  -2   2 3.33830 1.74187   2 
   6   2  -2 2.12787 1.17189   3 
  -6   2   2 0.78126 1.27396   2 
   6   2  -2 0.55871 1.46171   2 
  -6   2   2 2.69540 1.42811   3 
  -4  -2   2 1169.86 27.4468   2 
   4  -2  -2 1204.29 26.5583   2 
  -4  -2   2 1145.98 26.5990   3 
  -4   2   2 1109.27 26.7301   2 
   4   2  -2 1167.30 26.6844   3 
  -4   2   2 1156.67 26.4808   4 
  -4   2   2 1194.66 27.0678   3 
   4   2  -2 1179.86 27.3961   2 
  -2  -2   2 118.736 3.35349   3 
   2  -2  -2 113.981 3.15046   2 
  -2  -2   2 115.104 4.14773   2 
  -2   2   2 116.245 3.18217   2 
   2   2  -2 120.635 4.17924   2 
   2   2  -2 114.678 3.38957   3 
  -2   2   2 116.833 3.75279   4 
   0  -2   2 4442.81 97.4586   2 
   0  -2  -2 4449.82 97.2451   4 
   0   2  -2 4410.28 97.1188   4 
   2  -2   2 4.79100 0.59914   3 
  -2  -2  -2 4.52614 1.00795   4 
   2  -2   2 4.30639 0.88677   4 
  -2  -2  -2 5.15173 0.92351   3 
   2  -2   2 5.47168 1.22571   2 
   2   2   2 3.03797 0.90154   2 
  -2   2  -2 2.83073 1.11922   2 
   2   2   2 3.83303 0.87638   3 
  -2   2  -2 5.05713 0.55393   3 
  -2   2  -2 3.88981 0.97597   4 
  -4  -2  -2 5599.99 122.350   3 
  -4  -2  -2 5579.61 122.824   2 
   4   2   2 5566.33 122.725   2 
  -6  -2  -2 1228.17 29.0370   2 
   6  -2   2 1209.39 27.2035   4 
  -6  -2  -2 1225.64 28.2857   3 
   6  -2   2 1235.64 28.1065   3 
  -6  -2  -2 1209.22 27.9260   4 
  -6   2  -2 1210.97 27.9069   3 
  -6   2  -2 1201.92 27.6294   4 
   6   2   2 1176.60 27.4654   4 
  -6   2  -2 1235.06 29.1362   2 
   6   2   2 1244.66 28.9360   2 
   6   2   2 1229.48 28.2831   3 
   8  -2   2 2199.38 50.1600   4 
  -8  -2  -2 2260.50 51.1033   4 
  -8  -2  -2 2333.46 51.7911   3 
  -8  -2  -2 2291.89 52.8454   2 
   8  -2   2 2283.65 51.6706   3 
  -8   2  -2 2300.23 52.7319   2 
   8   2   2 2326.04 51.8790   3 
   8   2   2 2177.25 50.5156   4 
  -8   2  -2 2364.18 51.5502   3 
  -8   2  -2 2258.54 50.7915   4 
   8   2   2 2261.76 52.5870   2 
 -10  -2  -2 106.476 6.18986   2 
  10  -2   2 113.324 3.41355   4 
 -10  -2  -2 109.810 5.20568   3 
  10  -2   2 111.792 5.18262   3 
 -10  -2  -2 110.332 4.50076   4 
 -10   2  -2 114.241 4.22973   4 
 -10   2  -2 109.451 5.03325   3 
 -10   2  -2 113.344 6.19205   2 
  10   2   2 109.924 5.19037   3 
  10   2   2 109.495 3.77970   4 
  10   2   2 107.697 6.07483   2 
 -12  -2  -2 366.614 11.7266   4 
  12  -2   2 381.740 11.9771   3 
  12  -2   2 382.295 9.48642   4 
 -12  -2  -2 381.195 13.3799   2 
 -12  -2  -2 401.744 12.0046   3 
  12   2   2 380.496 11.9411   3 
 -12   2  -2 395.973 13.2853   2 
  12   2   2 389.252 9.90630   4 
 -12   2  -2 373.639 10.4814   4 
  12   2   2 389.369 13.2927   2 
 -12   2  -2 399.125 11.6740   3 
 -14  -2  -2 76.6826 7.12182   2 
  14  -2   2 61.5217 2.89522   4 
  14  -2   2 58.0742 5.57606   3 
 -14  -2  -2 72.1875 5.93263   3 
 -14  -2  -2 68.8768 4.60780   4 
 -14   2  -2 68.6144 4.34332   4 
  14   2   2 69.8901 3.31455   4 
  14   2   2 72.0506 5.76102   3 
 -14   2  -2 62.3218 6.86905   2 
  14   2   2 77.1088 7.26697   2 
 -14   2  -2 60.3302 5.51245   3 
 -16  -2  -2 71.4502 7.57741   2 
 -16  -2  -2 71.1615 5.41396   4 
  16  -2   2 69.7347 3.38491   4 
  16  -2   2 76.3787 6.95012   3 
 -16  -2  -2 63.2766 6.85648   3 
  16   2   2 73.2700 7.41579   2 
 -16   2  -2 59.6568 6.53363   3 
 -16   2  -2 70.6089 5.08403   4 
  16   2   2 68.3376 6.66073   3 
  16   2   2 63.6795 3.65227   4 
 -16   2  -2 67.5980 8.01303   2 
 -18  -2  -2 37.9844 6.99326   2 
 -18  -2  -2 36.9845 5.60610   3 
  18  -2   2 33.8658 5.41580   3 
 -18  -2  -2 27.6577 4.42383   4 
  18   2   2 32.5590 3.64255   4 
  18   2   2 28.6046 6.94167   2 
 -18   2  -2 48.9389 7.79647   2 
  18   2   2 31.3228 5.51987   3 
 -18   2  -2 27.8257 4.12745   4 
 -18   2  -2 24.5899 4.99741   3 
 -20  -2  -2 49.2810 8.90414   2 
 -20  -2  -2 69.6148 8.08339   4 
  20  -2   2 59.1467 7.66289   3 
 -20  -2  -2 55.6920 7.46738   3 
  20   2   2 64.3047 9.75969   2 
 -20   2  -2 65.2358 9.32815   2 
 -20   2  -2 65.2467 7.37087   4 
  20   2   2 62.6685 7.61741   3 
 -20   2  -2 51.7650 7.33890   3 
 -22  -2  -2 74.3644 10.8398   2 
  22  -2   2 74.0768 9.82239   3 
 -22   2  -2 64.5696 9.86439   3 
 -22   2  -2 86.0221 11.7627   2 
  22   2   2 53.1232 8.29087   3 
  23  -3  -2 20.0321 8.46244   3 
 -23  -3   2 34.4516 10.5645   2 
 -23   3   2 17.8190 9.82666   2 
  23   3  -2 29.8096 8.19023   3 
 -21  -3   2 6.76123 7.88016   2 
  21  -3  -2 13.0168 8.11731   2 
  21  -3  -2 4.02298 6.04231   3 
 -21  -3   2 4.40170 7.28675   3 
 -21  -3   2 5.18056 3.29438   4 
 -21   3   2 -4.3829 7.02137   2 
  21   3  -2 5.92886 7.92201   2 
  21   3  -2 7.99083 6.53935   3 
 -21   3   2 18.1463 6.83479   3 
 -19  -3   2 23.2532 3.30084   4 
 -19  -3   2 16.9472 6.93628   2 
 -19  -3   2 18.2926 5.43395   3 
  19  -3  -2 21.3822 6.08133   2 
  19  -3  -2 30.0984 5.91646   3 
 -19   3   2 21.9081 8.07357   2 
 -19   3   2 22.5392 2.74956   4 
 -19   3   2 24.9475 6.28042   3 
  19   3  -2 25.2221 5.92827   3 
  19   3  -2 27.7025 7.04198   2 
 -17  -3   2 299.117 12.2937   3 
 -17  -3   2 317.654 14.5427   2 
  17  -3  -2 306.763 13.1349   3 
 -17  -3   2 295.758 9.10284   4 
  17  -3  -2 303.128 13.6988   2 
 -17   3   2 301.890 12.6647   3 
  17   3  -2 313.211 12.8858   3 
  17   3  -2 263.576 13.4628   2 
 -17   3   2 298.179 8.44698   4 
 -17   3   2 296.090 13.6708   2 
 -15  -3   2 176.832 10.1882   2 
  15  -3  -2 163.844 9.47317   2 
 -15  -3   2 172.524 8.56981   3 
  15  -3  -2 181.013 9.25101   3 
 -15  -3   2 173.955 5.99142   4 
 -15   3   2 177.227 5.41160   4 
  15   3  -2 174.294 10.0735   2 
 -15   3   2 180.609 8.99236   3 
 -15   3   2 168.811 9.68816   2 
  15   3  -2 178.461 8.80701   3 
  13  -3  -2 6.06537 2.88273   3 
  13  -3  -2 7.50311 3.26559   2 
 -13  -3   2 7.87362 2.83171   3 
 -13  -3   2 7.51975 3.44323   2 
 -13   3   2 8.28175 3.05920   3 
  13   3  -2 3.39964 3.15826   2 
  13   3  -2 9.06654 2.79159   3 
 -13   3   2 7.25146 3.17947   2 
 -13   3   2 7.46265 1.26165   4 
  11  -3  -2 440.032 13.2666   2 
 -11  -3   2 444.311 11.0829   4 
 -11  -3   2 432.881 14.2440   2 
  11  -3  -2 425.212 13.3871   3 
 -11  -3   2 449.788 13.0256   3 
  11   3  -2 443.981 13.2108   3 
  11   3  -2 449.508 14.1397   2 
 -11   3   2 447.091 13.6595   2 
 -11   3   2 450.468 13.2759   3 
 -11   3   2 441.990 10.6171   4 
   9  -3  -2 65.2684 4.34698   3 
   9  -3  -2 65.4378 4.24487   2 
  -9  -3   2 53.3838 4.69770   2 
  -9  -3   2 58.1285 2.60137   4 
  -9  -3   2 63.1022 4.00850   3 
  -9   3   2 62.1777 4.18422   3 
   9   3  -2 66.9220 5.11670   2 
   9   3  -2 61.8792 3.96758   3 
  -9   3   2 58.8795 4.26843   2 
   7  -3  -2 19.4200 2.46166   3 
  -7  -3   2 15.7938 2.51573   2 
  -7  -3   2 21.3649 2.51605   3 
  -7  -3   2 18.7848 1.57649   4 
   7  -3  -2 21.0981 2.31160   2 
   7   3  -2 25.2697 3.04482   2 
  -7   3   2 22.2874 2.61588   2 
  -7   3   2 16.9283 2.20245   3 
   7   3  -2 16.8926 2.02511   3 
  -5  -3   2 160.760 5.21039   3 
  -5  -3   2 166.123 6.12090   2 
   5  -3  -2 169.121 5.09366   2 
  -5   3   2 169.268 5.68565   3 
  -5   3   2 171.678 5.23248   2 
   5   3  -2 160.000 5.24224   3 
   5   3  -2 158.475 6.03698   2 
  -5   3   2 160.983 4.92819   4 
  -3  -3   2 5403.31 118.221   2 
   3   3  -2 5315.08 118.190   2 
   1  -3  -2 18.8834 1.76007   3 
  -1  -3   2 19.5617 2.19711   2 
  -1  -3   2 22.3505 1.15261   3 
  -1   3   2 18.1752 1.73427   3 
   1   3  -2 20.7872 1.22406   3 
   1   3  -2 17.0151 2.04487   2 
  -1   3   2 20.1797 1.67351   4 
  -1  -3  -2 443.030 10.3470   2 
   1  -3   2 438.038 11.2476   2 
  -1  -3  -2 445.682 10.8029   4 
   1  -3   2 435.186 10.6323   4 
  -1  -3  -2 448.172 10.8370   3 
   1   3   2 441.827 10.6626   4 
   1   3   2 452.558 10.8180   3 
   1   3   2 435.493 10.2726   2 
  -1   3  -2 436.262 10.5788   4 
  -1   3  -2 426.169 11.2355   2 
   3  -3   2 12.1329 1.38735   4 
  -3  -3  -2 15.4137 1.68416   4 
  -3  -3  -2 15.5308 1.68198   3 
   3  -3   2 13.3806 1.28851   3 
  -3  -3  -2 16.8548 1.94541   2 
   3   3   2 16.8952 1.67386   2 
   3   3   2 13.3996 1.43781   4 
  -3   3  -2 14.2279 1.35295   4 
  -3   3  -2 10.6574 1.70069   2 
  -3   3  -2 12.1805 1.16546   3 
   3   3   2 18.5594 1.70686   3 
  -5  -3  -2 48.6049 2.61502   4 
  -5  -3  -2 54.2837 3.33263   2 
  -5  -3  -2 61.5419 2.96550   3 
   5  -3   2 52.5637 2.53956   3 
   5  -3   2 54.0823 2.01194   4 
  -5   3  -2 53.1110 2.44294   3 
   5   3   2 56.1248 2.83441   3 
  -5   3  -2 53.9102 2.40196   4 
   5   3   2 52.0605 3.26910   2 
   5   3   2 52.5405 2.28261   4 
  -7  -3  -2 773.080 19.8341   2 
   7  -3   2 784.249 18.7673   3 
   7  -3   2 747.742 17.3956   4 
  -7  -3  -2 782.704 18.4627   4 
  -7  -3  -2 779.418 18.9989   3 
  -7   3  -2 756.764 18.4894   3 
   7   3   2 772.108 18.9513   3 
   7   3   2 770.618 17.9250   4 
   7   3   2 765.724 19.5367   2 
  -7   3  -2 766.000 17.9805   4 
  -7   3  -2 779.418 19.8025   2 
  -9  -3  -2 521.625 15.2610   2 
   9  -3   2 526.453 14.0402   3 
   9  -3   2 507.863 12.1175   4 
  -9  -3  -2 534.762 14.1623   3 
  -9  -3  -2 530.985 13.3993   4 
  -9   3  -2 524.788 13.7358   3 
  -9   3  -2 505.298 14.8792   2 
  -9   3  -2 526.481 12.9023   4 
   9   3   2 529.914 12.7382   4 
   9   3   2 522.380 14.1379   3 
   9   3   2 523.064 14.9037   2 
  11  -3   2 73.7462 2.63252   4 
 -11  -3  -2 76.4540 4.84253   3 
 -11  -3  -2 81.2308 4.13657   4 
  11  -3   2 76.9740 4.82052   3 
 -11  -3  -2 76.7356 5.96890   2 
  11   3   2 80.1728 3.25837   4 
 -11   3  -2 85.1066 4.72200   3 
 -11   3  -2 71.0349 3.61149   4 
 -11   3  -2 62.1950 5.54875   2 
  11   3   2 80.1126 4.82770   3 
  11   3   2 69.7476 5.79878   2 
 -13  -3  -2 -1.2085 2.01697   4 
  13  -3   2 -0.7982 2.47189   3 
 -13  -3  -2 -0.4269 2.63620   3 
 -13  -3  -2 -1.1518 3.07244   2 
  13  -3   2 2.93957 0.98400   4 
  13   3   2 -4.6758 2.23435   3 
 -13   3  -2 0.13880 1.77382   4 
  13   3   2 2.73867 1.29325   4 
 -13   3  -2 1.27518 2.48731   3 
 -13   3  -2 1.21493 3.35717   2 
  13   3   2 3.35775 3.49324   2 
  15  -3   2 226.314 6.54800   4 
 -15  -3  -2 229.001 9.78131   3 
 -15  -3  -2 225.862 8.37984   4 
  15  -3   2 238.606 9.97883   3 
 -15  -3  -2 233.966 11.6494   2 
 -15   3  -2 220.429 7.82336   4 
 -15   3  -2 233.744 11.0655   2 
  15   3   2 234.673 11.5983   2 
 -15   3  -2 233.782 9.42113   3 
  15   3   2 230.477 9.83386   3 
  15   3   2 225.972 7.00218   4 
  17  -3   2 12.9864 4.20110   3 
 -17  -3  -2 20.1138 4.75358   3 
 -17  -3  -2 17.1941 3.50977   4 
 -17  -3  -2 17.3242 6.39286   2 
 -17   3  -2 16.7005 3.16624   4 
  17   3   2 20.2581 5.63440   2 
  17   3   2 16.5013 4.43973   3 
 -17   3  -2 17.4913 5.30527   2 
  17   3   2 14.7482 2.24576   4 
 -17   3  -2 13.9628 4.16694   3 
  19  -3   2 99.7166 11.9298   3 
 -19  -3  -2 81.6985 7.64044   4 
 -19  -3  -2 95.6605 9.75438   3 
 -19  -3  -2 120.238 12.3176   2 
  19   3   2 92.1543 5.24647   4 
 -19   3  -2 90.4124 9.93710   2 
 -19   3  -2 86.4353 7.24878   4 
  19   3   2 86.8182 9.00630   3 
  19   3   2 67.3914 9.13321   2 
 -19   3  -2 74.4904 8.79658   3 
  21  -3   2 35.1649 7.38545   3 
 -21  -3  -2 23.3392 6.83559   3 
 -21  -3  -2 37.7797 9.36627   2 
  21   3   2 32.4492 7.07806   3 
 -21   3  -2 33.3305 8.72234   2 
 -21   3  -2 39.4479 7.50046   3 
  23  -3   2 83.0008 10.7949   3 
 -23  -3  -2 65.1925 11.9898   2 
 -23   3  -2 79.4940 12.4514   2 
  23   3   2 91.4403 10.7130   3 
  22  -4  -2 1.84718 7.39347   3 
 -22   4   2 -14.646 7.74130   2 
  22   4  -2 -2.1061 6.88819   3 
 -20  -4   2 44.1458 4.39554   4 
  20  -4  -2 54.6294 8.74534   2 
 -20  -4   2 39.1787 8.65757   2 
  20  -4  -2 39.2533 6.85934   3 
 -20  -4   2 33.1820 6.79966   3 
  20   4  -2 45.4548 8.79614   2 
 -20   4   2 44.7400 7.92743   2 
  20   4  -2 37.6366 6.83156   3 
 -20   4   2 41.8605 7.60948   3 
 -20   4   2 38.7342 4.38105   4 
 -18  -4   2 6.32386 5.42189   2 
 -18  -4   2 3.63068 4.43399   3 
  18  -4  -2 10.4688 5.50531   2 
  18  -4  -2 -0.1498 7.43520   3 
 -18  -4   2 2.45972 2.30472   4 
 -18   4   2 5.36917 5.09531   2 
  18   4  -2 5.43728 4.40760   3 
  18   4  -2 13.6247 6.17229   2 
 -18   4   2 4.82334 4.77331   3 
 -18   4   2 7.00224 1.95999   4 
 -16  -4   2 77.0458 7.15600   3 
  16  -4  -2 80.0517 7.61546   3 
  16  -4  -2 81.2504 8.37809   2 
 -16  -4   2 86.8047 4.59854   4 
 -16  -4   2 72.8493 7.88531   2 
 -16   4   2 80.0037 3.61116   4 
  16   4  -2 89.4479 8.79872   2 
 -16   4   2 74.6222 7.95416   2 
  16   4  -2 83.0417 7.14228   3 
 -16   4   2 67.1102 7.70381   3 
  14  -4  -2 6.58201 3.29189   3 
 -14  -4   2 -1.2942 3.36923   2 
  14  -4  -2 -2.7262 3.19919   2 
 -14  -4   2 -0.9704 1.40738   4 
 -14  -4   2 3.52876 2.95316   3 
  14   4  -2 0.44583 3.43908   2 
 -14   4   2 -3.0482 3.01133   2 
 -14   4   2 -0.4590 2.90542   3 
 -14   4   2 -0.6683 1.02872   4 
  14   4  -2 3.12626 2.74075   3 
 -12  -4   2 108.230 7.42333   3 
  12  -4  -2 149.056 7.28150   3 
  12  -4  -2 139.651 6.96275   2 
 -12  -4   2 140.246 4.72055   4 
 -12  -4   2 123.629 7.89449   2 
 -12   4   2 139.014 7.12369   2 
 -12   4   2 124.184 8.00107   3 
  12   4  -2 133.784 6.68204   3 
 -10  -4   2 247.808 9.73748   2 
  10  -4  -2 250.218 8.80854   2 
  10  -4  -2 257.443 9.15215   3 
 -10  -4   2 257.281 6.94037   4 
 -10   4   2 260.200 6.46823   4 
 -10   4   2 251.186 8.84928   3 
  10   4  -2 246.543 9.70599   2 
 -10   4   2 246.588 8.93455   2 
  10   4  -2 247.426 8.58303   3 
   8  -4  -2 134.386 5.95324   3 
  -8  -4   2 137.942 4.28625   4 
   8  -4  -2 144.371 5.60814   2 
  -8  -4   2 141.079 5.50823   3 
  -8  -4   2 144.826 6.58803   2 
   8   4  -2 147.857 6.64356   2 
  -8   4   2 128.797 5.75269   3 
  -8   4   2 139.112 5.58814   2 
   8   4  -2 134.388 5.48075   3 
  -6  -4   2 607.805 14.5572   4 
  -6  -4   2 619.291 16.6108   2 
   6  -4  -2 625.667 15.2628   2 
  -6  -4   2 611.649 15.4405   3 
  -6   4   2 626.597 15.3492   2 
   6   4  -2 613.588 15.4809   3 
  -6   4   2 634.590 16.0397   3 
   6   4  -2 617.936 16.5969   2 
  -6   4   2 622.787 14.7932   4 
  -4  -4   2 9999.99 219.310   2 
  -2  -4   2 2113.97 46.2885   3 
  -2  -4   2 2080.77 47.4257   2 
   2  -4  -2 2114.19 47.0435   3 
   2  -4  -2 1981.57 46.4999   4 
  -2   4   2 2126.94 47.0601   3 
  -2   4   2 2102.55 46.4726   4 
   2   4  -2 2123.89 46.3044   3 
  -2   4   2 2044.70 45.6648   2 
   2   4  -2 2141.01 47.5425   2 
   0  -4  -2 838.731 19.1204   3 
   0  -4  -2 791.154 18.0764   2 
   0  -4   2 834.448 19.5282   2 
   0  -4  -2 722.246 19.2724   4 
   0  -4   2 818.846 18.1463   3 
   0   4   2 818.321 19.0465   3 
   0   4   2 812.799 18.6886   4 
   0   4   2 807.383 18.0169   2 
   0   4  -2 827.959 19.5589   2 
   0   4  -2 825.321 18.1073   3 
  -2  -4  -2 517.897 13.7550   2 
   2  -4   2 554.778 12.9743   4 
  -2  -4  -2 555.546 13.2710   4 
  -2  -4  -2 565.434 13.5225   3 
   2  -4   2 559.709 13.9037   2 
  -2   4  -2 551.975 12.5612   3 
   2   4   2 550.789 13.1198   2 
  -2   4  -2 547.069 13.9418   2 
   2   4   2 538.091 13.3754   3 
  -4  -4  -2 0.96026 1.03555   3 
  -4  -4  -2 0.98518 1.19652   2 
  -4  -4  -2 0.26636 0.75748   4 
   4  -4   2 -0.3463 0.64748   4 
   4   4   2 0.22311 0.93380   3 
  -4   4  -2 0.25857 0.81800   4 
   4   4   2 1.33148 1.21784   4 
  -4   4  -2 -0.9083 1.24048   2 
   4   4   2 0.30222 1.20595   2 
  -4   4  -2 -0.1065 0.83493   3 
  -6  -4  -2 9.06732 1.47847   4 
   6  -4   2 9.02740 1.01452   4 
  -6  -4  -2 10.0103 2.02792   2 
  -6  -4  -2 13.1313 1.93713   3 
   6  -4   2 11.6434 1.72612   3 
   6   4   2 12.7765 2.17969   2 
  -6   4  -2 9.69779 1.52049   3 
   6   4   2 10.3185 1.75772   3 
  -6   4  -2 9.18867 1.28541   4 
   6   4   2 10.1095 1.14646   4 
  -8  -4  -2 3.03194 1.58534   3 
  -8  -4  -2 4.79087 1.54342   4 
   8  -4   2 7.23895 0.79716   4 
   8  -4   2 7.65760 1.83888   3 
  -8  -4  -2 5.73107 2.12499   2 
  -8   4  -2 5.71526 1.64085   3 
   8   4   2 5.67143 1.76271   3 
  -8   4  -2 5.41472 1.28463   4 
   8   4   2 3.68895 2.04273   2 
   8   4   2 4.21264 0.94969   4 
  -8   4  -2 6.15828 2.12294   2 
 -10  -4  -2 1066.67 26.0563   4 
 -10  -4  -2 1111.38 27.0711   3 
  10  -4   2 1096.44 26.9281   3 
  10  -4   2 1078.88 24.5511   4 
 -10  -4  -2 1111.81 28.5372   2 
  10   4   2 1091.82 25.3825   4 
 -10   4  -2 1123.77 28.0729   2 
  10   4   2 1083.14 27.0365   3 
 -10   4  -2 1101.82 25.4175   4 
  10   4   2 1115.63 28.0201   2 
 -10   4  -2 1109.75 26.5201   3 
 -12  -4  -2 3.18853 3.35723   2 
  12  -4   2 7.35518 2.46403   3 
 -12  -4  -2 -0.9315 1.80124   4 
  12  -4   2 1.73423 0.83908   4 
  12   4   2 2.23575 2.87112   2 
  12   4   2 5.41413 2.38007   3 
 -12   4  -2 2.36393 1.61923   4 
  12   4   2 3.52899 1.17497   4 
 -12   4  -2 -2.7860 2.01063   3 
 -12   4  -2 -0.2396 2.56672   2 
  14  -4   2 34.4703 4.43026   3 
 -14  -4  -2 25.5827 4.64642   2 
  14  -4   2 27.0670 2.03205   4 
 -14  -4  -2 28.5232 4.25680   3 
 -14  -4  -2 23.5395 3.47686   4 
 -14   4  -2 26.8107 3.68223   3 
 -14   4  -2 30.4822 3.08172   4 
  14   4   2 24.9860 2.73683   4 
  14   4   2 36.9768 5.40396   2 
 -14   4  -2 18.9438 4.52815   2 
  14   4   2 22.8111 3.66623   3 
  16  -4   2 31.9304 4.89544   3 
 -16  -4  -2 35.2777 5.06319   3 
 -16  -4  -2 27.1206 5.64500   2 
 -16  -4  -2 40.4613 4.06520   4 
 -16   4  -2 39.3995 6.10825   2 
  16   4   2 34.6986 6.02067   2 
 -16   4  -2 38.2462 4.56495   4 
  16   4   2 33.8426 4.99182   3 
 -16   4  -2 34.3077 4.70924   3 
  16   4   2 34.9836 3.17051   4 
  18  -4   2 3.62500 4.63817   3 
 -18  -4  -2 4.08530 5.87591   2 
 -18  -4  -2 -1.8708 4.34716   3 
 -18  -4  -2 3.45640 3.45505   4 
 -18   4  -2 3.65941 4.20810   3 
  18   4   2 3.31965 6.01488   2 
  18   4   2 0.14106 1.96282   4 
 -18   4  -2 7.08009 5.69459   2 
 -18   4  -2 -0.6824 2.93564   4 
  18   4   2 6.34917 4.35793   3 
 -20  -4  -2 7.05364 6.38133   3 
  20  -4   2 7.45936 5.58470   3 
 -20  -4  -2 3.11626 4.67606   4 
 -20  -4  -2 19.3762 7.88428   2 
 -20   4  -2 8.82350 4.28789   4 
 -20   4  -2 7.17704 5.73818   3 
  20   4   2 1.07004 8.05888   2 
 -20   4  -2 12.7777 7.35598   2 
  20   4   2 19.2284 6.24805   3 
 -22  -4  -2 16.2225 9.44062   2 
  22  -4   2 23.7807 7.75045   3 
  22   4   2 26.0108 7.31419   3 
 -22   4  -2 32.7464 7.80777   3 
 -22   4  -2 26.5606 9.45522   2 
  23  -5  -2 26.7520 8.94957   3 
 -23  -5   2 66.3608 11.8523   2 
 -23   5   2 49.5707 11.0436   2 
  23   5  -2 54.9718 9.60379   3 
 -21  -5   2 25.8230 4.19531   4 
 -21  -5   2 24.9993 8.88208   2 
  21  -5  -2 42.6173 8.13246   3 
 -21   5   2 22.9299 7.97291   2 
 -21   5   2 34.7038 7.78382   3 
  21   5  -2 38.9860 7.32031   3 
 -19  -5   2 68.6552 5.58834   4 
  19  -5  -2 95.5452 10.3946   3 
 -19  -5   2 62.5667 9.01631   2 
 -19  -5   2 78.2236 8.01469   3 
 -19   5   2 79.2681 4.50349   4 
  19   5  -2 82.9212 9.58390   2 
 -19   5   2 59.9209 13.0031   2 
  19   5  -2 79.1985 9.26048   3 
 -19   5   2 72.6297 7.98694   3 
 -17  -5   2 241.070 8.20017   4 
  17  -5  -2 239.128 12.4267   2 
 -17  -5   2 242.632 11.2445   3 
 -17  -5   2 249.060 13.4377   2 
  17  -5  -2 248.993 12.1953   3 
 -17   5   2 227.981 12.1029   2 
 -17   5   2 255.672 12.0282   3 
 -17   5   2 235.804 7.05870   4 
  17   5  -2 243.381 11.4337   3 
  17   5  -2 238.301 12.9958   2 
  15  -5  -2 147.953 8.63430   3 
 -15  -5   2 144.412 9.63649   2 
  15  -5  -2 140.665 8.88837   2 
 -15  -5   2 143.006 5.68126   4 
 -15  -5   2 136.607 8.03946   3 
 -15   5   2 133.764 8.98507   2 
 -15   5   2 145.232 8.58147   3 
  15   5  -2 137.277 9.53513   2 
 -15   5   2 147.730 4.57332   4 
  15   5  -2 140.634 8.08664   3 
  13  -5  -2 175.639 8.52542   2 
 -13  -5   2 166.256 7.79480   3 
  13  -5  -2 185.238 8.69894   3 
 -13  -5   2 188.535 9.56785   2 
 -13  -5   2 141.544 7.05701   4 
 -13   5   2 164.648 8.25713   3 
 -13   5   2 173.581 8.43250   2 
  13   5  -2 171.442 7.93400   3 
 -13   5   2 169.134 4.76304   4 
  13   5  -2 172.186 9.33762   2 
 -11  -5   2 72.8003 6.07448   2 
  11  -5  -2 66.7631 5.14517   2 
  11  -5  -2 73.8858 5.48001   3 
 -11  -5   2 69.8363 3.18381   4 
 -11  -5   2 67.7599 4.83981   3 
 -11   5   2 68.0188 2.46730   4 
  11   5  -2 65.6298 4.64032   3 
  11   5  -2 72.2850 6.31573   2 
 -11   5   2 71.2839 5.14069   2 
 -11   5   2 73.3444 5.24543   3 
   9  -5  -2 650.184 16.7053   2 
  -9  -5   2 633.442 15.0977   4 
  -9  -5   2 618.598 18.1310   2 
  -9  -5   2 627.592 16.5469   3 
   9   5  -2 619.765 16.6666   3 
   9   5  -2 620.806 17.9258   2 
  -9   5   2 644.867 16.7828   2 
  -9   5   2 640.824 17.1392   3 
  -9   5   2 619.348 15.3069   4 
  -7  -5   2 427.382 12.8530   2 
  -7  -5   2 425.441 11.4870   3 
   7  -5  -2 402.957 11.1866   2 
  -7  -5   2 426.862 10.3997   4 
   7   5  -2 424.416 12.8016   2 
  -7   5   2 411.397 11.3036   2 
   7   5  -2 434.190 11.6183   3 
  -7   5   2 419.716 10.5857   4 
  -5  -5   2 330.777 9.00308   3 
  -5  -5   2 333.399 8.32738   4 
  -5   5   2 324.697 8.66715   2 
   5   5  -2 328.894 10.1809   2 
   5   5  -2 350.970 9.11977   3 
  -5   5   2 325.568 8.46308   4 
  -3  -5   2 9484.51 208.131   2 
  -1  -5   2 6126.18 134.332   2 
   1   5  -2 6107.83 134.333   2 
  -1   5   2 6046.31 133.816   3 
   1  -5   2 562.187 13.1429   3 
  -1  -5  -2 573.667 13.4793   2 
   1  -5   2 563.830 14.5025   2 
  -1  -5  -2 567.631 13.7469   4 
   1   5   2 563.631 13.4878   4 
  -1   5  -2 574.433 13.1342   3 
   1   5   2 571.848 13.4168   2 
  -1   5  -2 562.988 14.5854   2 
   1   5   2 588.405 14.1313   3 
  -3  -5  -2 26.8787 2.38481   3 
   3  -5   2 27.7037 1.72554   4 
   3  -5   2 25.9784 2.59199   2 
  -3  -5  -2 27.3565 2.14615   4 
  -3  -5  -2 26.7189 2.37243   2 
   3   5   2 27.1142 1.78842   4 
   3   5   2 28.2874 2.38606   2 
  -3   5  -2 25.7954 1.86729   3 
   3   5   2 27.1549 2.18503   3 
  -3   5  -2 28.5087 2.87143   2 
  -5  -5  -2 310.451 8.30251   4 
  -5  -5  -2 304.007 8.72967   3 
  -5  -5  -2 306.717 9.15718   2 
   5  -5   2 308.037 7.30710   4 
   5   5   2 301.077 8.94719   2 
   5   5   2 302.126 8.61905   3 
  -5   5  -2 299.650 9.21977   2 
  -5   5  -2 298.054 8.04994   3 
  -5   5  -2 299.716 7.58281   4 
   5   5   2 299.014 7.80180   4 
   7  -5   2 963.039 22.0746   4 
  -7  -5  -2 963.658 23.4925   4 
  -7  -5  -2 1027.98 25.0933   2 
  -7  -5  -2 994.734 24.2219   3 
   7  -5   2 1010.14 23.8849   3 
   7   5   2 984.424 22.9747   4 
   7   5   2 1009.34 24.8205   2 
   7   5   2 1002.98 24.1695   3 
  -7   5  -2 997.254 23.5547   3 
  -7   5  -2 1008.89 22.7665   4 
   9  -5   2 889.813 20.0464   4 
  -9  -5  -2 908.341 23.7643   2 
   9  -5   2 894.917 22.2909   3 
  -9  -5  -2 881.984 21.7113   4 
  -9  -5  -2 931.243 22.7020   3 
  -9   5  -2 908.001 23.3949   2 
   9   5   2 886.982 21.0353   4 
   9   5   2 907.875 23.4391   2 
  -9   5  -2 913.484 22.0337   3 
  -9   5  -2 887.457 20.8715   4 
   9   5   2 886.875 22.5296   3 
 -11  -5  -2 492.289 15.7848   2 
  11  -5   2 481.675 11.4338   4 
 -11  -5  -2 504.555 14.4491   3 
  11  -5   2 492.725 14.2375   3 
 -11  -5  -2 499.007 13.3688   4 
  11   5   2 504.431 14.3996   3 
 -11   5  -2 495.869 13.8045   3 
 -11   5  -2 495.178 15.1730   2 
 -11   5  -2 498.425 12.4874   4 
  11   5   2 491.453 12.4608   4 
  11   5   2 487.794 15.4589   2 
 -13  -5  -2 586.148 18.9867   2 
  13  -5   2 601.074 14.0881   4 
 -13  -5  -2 590.057 16.0710   4 
  13  -5   2 619.996 17.5078   3 
 -13  -5  -2 610.202 17.4749   3 
 -13   5  -2 605.864 18.5893   2 
  13   5   2 615.574 15.0639   4 
 -13   5  -2 607.958 15.1742   4 
  13   5   2 588.886 17.3032   3 
 -13   5  -2 593.535 16.6957   3 
  13   5   2 594.431 18.4803   2 
  15  -5   2 35.1073 4.84052   3 
 -15  -5  -2 26.9272 4.54625   3 
 -15  -5  -2 34.1814 5.87540   2 
 -15  -5  -2 32.3184 3.71390   4 
  15   5   2 24.6406 5.02316   2 
  15   5   2 33.1443 4.53504   3 
  15   5   2 30.3358 2.95042   4 
 -15   5  -2 35.0488 5.69503   2 
 -15   5  -2 34.4099 3.31432   4 
 -15   5  -2 41.0053 4.51388   3 
 -17  -5  -2 92.1778 6.57377   4 
 -17  -5  -2 78.0522 8.11076   3 
 -17  -5  -2 61.8508 10.5674   2 
  17  -5   2 72.4204 8.00746   3 
 -17   5  -2 80.4915 7.57322   3 
  17   5   2 77.3058 4.46546   4 
  17   5   2 69.9084 8.19747   2 
 -17   5  -2 71.2637 5.49335   4 
 -17   5  -2 84.2498 9.81653   2 
  17   5   2 76.4104 7.85622   3 
 -19  -5  -2 42.5849 6.87708   3 
  19  -5   2 32.5581 10.8469   3 
 -19  -5  -2 39.4319 5.39210   4 
 -19  -5  -2 39.2745 7.98559   2 
 -19   5  -2 39.9636 6.18973   3 
  19   5   2 36.5765 6.65863   3 
  19   5   2 35.0982 3.81327   4 
 -19   5  -2 48.6340 5.03761   4 
  19   5   2 32.7201 8.09397   2 
 -19   5  -2 31.9590 7.77950   2 
 -21  -5  -2 72.3321 11.9108   2 
  21  -5   2 86.0114 9.28246   3 
 -21   5  -2 55.6049 8.25425   3 
 -21   5  -2 121.802 14.4080   2 
  21   5   2 99.5453 9.29896   3 
 -22  -6   2 12.6409 9.42146   2 
  22   6  -2 16.2699 6.69185   3 
 -22   6   2 13.0066 8.45573   2 
 -20  -6   2 -6.4528 5.30291   3 
 -20  -6   2 3.48770 7.48235   2 
  20  -6  -2 4.45503 6.24867   3 
 -20  -6   2 10.1587 3.49613   4 
 -20   6   2 12.5707 6.40589   2 
 -20   6   2 7.17620 2.60975   4 
  20   6  -2 3.36354 5.57261   3 
 -20   6   2 3.54631 6.68736   3 
  20   6  -2 6.90632 8.34198   2 
 -18  -6   2 1.18563 4.46160   3 
 -18  -6   2 0.47031 2.49316   4 
  18  -6  -2 4.05567 4.71317   3 
 -18  -6   2 1.87737 5.89050   2 
  18   6  -2 -8.9609 5.86497   2 
 -18   6   2 -4.5249 4.69197   2 
  18   6  -2 6.43653 4.32988   3 
 -18   6   2 0.46278 1.70296   4 
 -18   6   2 0.26675 5.07725   3 
 -16  -6   2 65.0221 7.30594   3 
  16  -6  -2 62.9280 6.91970   3 
 -16  -6   2 68.4588 7.65454   2 
 -16  -6   2 67.3397 4.51409   4 
  16   6  -2 73.1596 7.20060   3 
 -16   6   2 62.9532 6.88687   2 
 -16   6   2 63.0411 3.15890   4 
 -16   6   2 55.1159 6.09775   3 
  16   6  -2 61.8754 7.07450   2 
 -14  -6   2 -3.0905 2.99502   3 
 -14  -6   2 0.33583 3.93451   2 
  14  -6  -2 0.35078 2.98552   3 
 -14  -6   2 0.54545 1.58679   4 
  14   6  -2 6.55263 4.39936   2 
 -14   6   2 4.31765 3.43592   2 
  14   6  -2 -1.8282 2.61062   3 
 -14   6   2 2.31636 0.99969   4 
 -14   6   2 2.04816 3.37587   3 
 -12  -6   2 13.5978 3.04508   3 
 -12  -6   2 16.9779 2.07212   4 
 -12  -6   2 15.1137 3.82767   2 
 -12   6   2 13.5518 3.28721   3 
  12   6  -2 7.45786 3.65114   2 
  12   6  -2 9.33505 2.57477   3 
 -12   6   2 14.5861 1.45870   4 
 -12   6   2 13.4031 3.06792   2 
 -10  -6   2 103.486 5.44480   3 
 -10  -6   2 109.438 7.00663   2 
 -10  -6   2 108.918 4.01902   4 
 -10   6   2 112.368 4.36460   4 
  10   6  -2 118.827 6.93821   2 
 -10   6   2 110.840 6.07198   3 
 -10   6   2 111.630 5.74163   2 
  10   6  -2 113.612 5.55419   3 
  -8  -6   2 181.879 6.51495   3 
  -8  -6   2 178.665 5.25248   4 
  -8  -6   2 178.229 7.80745   2 
  -8   6   2 169.845 5.37216   4 
  -8   6   2 164.883 6.92919   3 
   8   6  -2 176.397 6.51343   3 
  -8   6   2 179.702 6.40672   2 
   8   6  -2 171.834 7.84889   2 
  -6  -6   2 84.9764 5.06938   2 
  -6  -6   2 76.2356 3.85050   3 
  -6  -6   2 81.8108 3.04896   4 
  -6   6   2 88.6979 3.74102   2 
  -6   6   2 88.4766 4.70901   3 
  -6   6   2 83.2481 3.34112   4 
   6   6  -2 84.8991 3.98122   3 
   4  -6  -2 358.807 9.19602   4 
  -4  -6   2 369.290 9.01863   4 
  -4  -6   2 368.125 9.63046   3 
  -4   6   2 361.919 10.2576   3 
  -4   6   2 347.830 9.61667   2 
  -4   6   2 364.333 9.08792   2 
   4   6  -2 368.696 10.9976   2 
   4   6  -2 372.227 9.64158   3 
  -4   6   2 368.990 9.11768   4 
  -2  -6   2 2523.30 57.1888   2 
   2  -6  -2 2478.52 55.8259   4 
   2  -6  -2 2500.14 55.1005   2 
  -2  -6   2 2561.46 55.8382   3 
   2  -6  -2 2481.12 56.6075   3 
  -2  -6   2 2443.21 55.3978   4 
  -2   6   2 2488.79 55.5785   4 
  -2   6   2 2551.74 55.2275   2 
  -2   6   2 2547.90 56.6235   3 
   2   6  -2 2568.15 57.2501   2 
   2   6  -2 2502.48 55.7385   3 
   0  -6   2 23.2581 1.70354   3 
   0  -6  -2 22.2641 1.70339   2 
   0  -6  -2 24.8676 2.29387   3 
   0  -6   2 23.1066 2.74521   2 
   0   6   2 23.5358 1.65748   2 
   0   6  -2 19.9995 2.29012   2 
   0   6   2 21.9759 2.24158   3 
   0   6  -2 20.9541 1.50729   3 
   0   6   2 22.7584 1.67580   4 
   2  -6   2 105.689 4.50465   2 
  -2  -6  -2 100.103 4.16633   3 
  -2  -6  -2 96.0297 3.65866   4 
   2  -6   2 100.774 3.33712   3 
  -2  -6  -2 99.8397 3.85737   2 
  -2   6  -2 98.8575 4.57014   2 
   2   6   2 98.7627 3.78808   2 
   2   6   2 94.6853 3.91515   3 
   2   6   2 96.9494 3.35367   4 
  -2   6  -2 102.190 3.30627   3 
   4  -6   2 14.6956 1.40740   4 
   4  -6   2 10.4598 1.91503   2 
  -4  -6  -2 14.0256 2.07484   2 
  -4  -6  -2 12.6437 2.04831   3 
  -4  -6  -2 14.8033 1.79175   4 
   4   6   2 14.2756 2.06014   2 
   4   6   2 12.4968 1.49962   4 
  -4   6  -2 9.76623 2.02015   2 
  -4   6  -2 14.8843 1.68582   3 
  -4   6  -2 16.3684 1.62759   3 
   4   6   2 13.2990 1.90720   3 
  -6  -6  -2 10.5477 1.58492   4 
   6  -6   2 12.0879 1.00075   4 
  -6  -6  -2 16.6251 2.49654   3 
  -6  -6  -2 13.7797 2.44802   2 
   6   6   2 9.24792 1.66183   3 
  -6   6  -2 10.6275 1.79253   3 
  -6   6  -2 16.3450 2.56825   2 
   6   6   2 13.5466 1.47148   4 
  -6   6  -2 13.5049 1.53773   4 
   6   6   2 16.3512 2.51531   2 
  -8  -6  -2 14.7556 2.73972   2 
   8  -6   2 7.80822 1.99234   3 
  -8  -6  -2 10.1557 1.85977   4 
   8  -6   2 7.45291 0.76325   4 
  -8  -6  -2 8.81189 2.27962   3 
  -8   6  -2 8.23892 1.40430   4 
   8   6   2 5.90228 1.86035   3 
  -8   6  -2 5.07406 2.09324   2 
   8   6   2 9.04754 1.29064   4 
  -8   6  -2 10.0622 2.58788   2 
   8   6   2 10.5334 2.52274   2 
  -8   6  -2 6.77325 1.81336   3 
  10  -6   2 0.94651 0.53010   4 
 -10  -6  -2 3.77899 2.68001   2 
  10  -6   2 -0.2395 1.96852   3 
 -10  -6  -2 5.88062 2.38598   3 
 -10  -6  -2 -0.4849 1.36499   4 
 -10   6  -2 0.43255 1.76155   3 
  10   6   2 0.76060 0.98114   4 
 -10   6  -2 -0.0385 1.26210   4 
  10   6   2 2.59900 2.61600   2 
 -10   6  -2 0.35572 2.28641   2 
  10   6   2 4.60035 1.95989   3 
 -12  -6  -2 -1.4309 3.02226   2 
  12  -6   2 0.09740 2.24062   3 
  12  -6   2 0.51460 0.72376   4 
 -12  -6  -2 -0.6619 1.95687   4 
 -12  -6  -2 -0.7527 2.58821   3 
 -12   6  -2 0.80869 2.34270   3 
 -12   6  -2 -2.4253 1.57954   4 
  12   6   2 0.08614 2.27382   3 
 -12   6  -2 6.21019 3.18010   2 
  12   6   2 0.97059 3.19038   2 
  12   6   2 -3.3946 1.13217   4 
 -14  -6  -2 16.7004 3.11655   4 
 -14  -6  -2 14.6999 4.36976   2 
  14  -6   2 17.0002 3.80187   3 
 -14  -6  -2 14.6620 4.03201   3 
 -14   6  -2 16.0808 2.50012   4 
  14   6   2 17.8062 2.19679   4 
 -14   6  -2 14.9431 3.51312   3 
  14   6   2 9.17035 4.52632   2 
 -14   6  -2 12.7094 4.30339   2 
  14   6   2 22.9199 3.68930   3 
  16  -6   2 26.9993 5.03585   3 
 -16  -6  -2 29.7546 6.11298   2 
 -16  -6  -2 31.5273 4.98739   3 
 -16  -6  -2 31.5419 4.00988   4 
 -16   6  -2 35.8430 4.89978   3 
  16   6   2 36.1515 6.56268   2 
 -16   6  -2 42.4931 4.56766   4 
 -16   6  -2 42.7310 6.18647   2 
  16   6   2 35.1466 3.42700   4 
  16   6   2 29.4471 4.92358   3 
  18  -6   2 14.0627 5.26113   3 
 -18  -6  -2 18.1719 5.47305   3 
 -18  -6  -2 19.0297 4.30824   4 
 -18  -6  -2 8.28974 6.62841   2 
 -18   6  -2 16.9382 6.13778   2 
 -18   6  -2 8.22102 4.61135   3 
  18   6   2 12.2681 4.82384   3 
  18   6   2 9.90871 2.56607   4 
  18   6   2 3.22055 6.39725   2 
 -18   6  -2 11.6779 3.56243   4 
 -20  -6  -2 8.54339 8.10001   2 
  20  -6   2 5.87562 6.04199   3 
 -20  -6  -2 1.38727 4.76528   4 
 -20  -6  -2 1.72003 6.03857   3 
  20   6   2 4.57587 2.90808   4 
  20   6   2 3.88235 5.60309   3 
 -20   6  -2 -1.1892 5.88742   3 
 -20   6  -2 -3.5824 6.99496   2 
 -20   6  -2 -0.8538 3.78971   4 
 -22  -6  -2 5.64834 9.79190   2 
  22  -6   2 4.20972 7.74976   3 
  22   6   2 18.0051 7.29202   3 
 -22   6  -2 20.0879 9.74819   2 
 -22   6  -2 5.72847 7.30433   3 
 -23  -7   2 0.36225 10.5679   2 
  23   7  -2 22.4983 8.64239   3 
 -23   7   2 13.2166 6.49630   4 
 -23   7   2 14.9114 9.81686   2 
 -21  -7   2 23.9301 9.03580   2 
 -21  -7   2 26.2975 4.68362   4 
 -21   7   2 35.7781 8.68165   2 
  21   7  -2 38.4800 7.56708   3 
 -19  -7   2 41.6847 6.86020   3 
 -19  -7   2 46.2587 8.65508   2 
 -19  -7   2 47.0603 5.20781   4 
 -19   7   2 44.4056 3.99919   4 
  19   7  -2 49.7501 9.34617   2 
 -19   7   2 29.6425 12.3122   2 
  19   7  -2 45.3092 6.98229   3 
 -19   7   2 52.0749 7.67832   3 
 -17  -7   2 56.9952 4.71655   4 
 -17  -7   2 53.7831 6.31344   3 
 -17  -7   2 48.4347 8.35588   2 
 -17   7   2 57.6161 6.78082   2 
 -17   7   2 56.3803 6.56204   3 
 -17   7   2 54.1278 3.19455   4 
  17   7  -2 47.7072 6.38245   3 
  17   7  -2 43.8640 6.79625   2 
 -15  -7   2 135.092 8.31693   3 
 -15  -7   2 146.308 5.92842   4 
 -15  -7   2 159.185 10.4473   2 
  15   7  -2 121.826 9.88041   2 
  15   7  -2 148.734 8.51317   3 
 -15   7   2 131.275 8.89795   2 
 -15   7   2 137.840 6.11975   4 
 -15   7   2 143.288 4.36540   4 
 -15   7   2 138.732 8.92214   3 
 -13  -7   2 266.934 11.9540   2 
 -13  -7   2 257.801 7.82266   4 
 -13  -7   2 254.865 9.90584   3 
 -13   7   2 242.851 7.70934   4 
  13   7  -2 246.545 11.5976   2 
 -13   7   2 241.887 10.2707   3 
 -13   7   2 245.986 10.1229   2 
  13   7  -2 236.473 9.66289   3 
 -13   7   2 255.457 6.33290   4 
 -11  -7   2 80.0699 3.59210   4 
 -11  -7   2 76.9383 6.41480   2 
 -11   7   2 75.9437 3.74009   4 
  11   7  -2 79.8247 5.07074   3 
 -11   7   2 74.5489 2.55429   4 
 -11   7   2 76.0516 5.86994   3 
 -11   7   2 82.4605 5.28400   2 
  11   7  -2 65.3576 6.48835   2 
  -9  -7   2 347.636 12.1516   2 
  -9  -7   2 337.672 8.96419   4 
  -9  -7   2 332.658 10.4250   3 
  -9   7   2 330.979 10.2949   2 
   9   7  -2 344.717 10.5390   3 
  -9   7   2 340.743 8.92329   4 
   9   7  -2 335.489 11.9524   2 
  -9   7   2 345.394 11.1407   3 
  -7  -7   2 1578.96 38.0732   2 
  -7  -7   2 1534.33 36.2814   3 
  -7  -7   2 1537.79 35.0185   4 
  -7   7   2 1589.21 37.1726   3 
   7   7  -2 1539.09 36.3274   3 
  -7   7   2 1541.51 35.8841   2 
  -7   7   2 1561.04 34.9109   4 
   7   7  -2 1545.60 37.7849   2 
  -5  -7   2 3180.25 70.2891   3 
  -5  -7   2 3150.86 71.7767   2 
   5  -7  -2 3141.05 69.3337   4 
  -5  -7   2 3032.71 69.2646   4 
  -5   7   2 3199.26 69.6982   2 
  -5   7   2 3174.89 69.2429   4 
  -5   7   2 3119.64 69.6314   2 
  -5   7   2 3081.55 70.9390   3 
   5   7  -2 3236.14 71.8739   2 
   5   7  -2 3112.82 70.2356   3 
  -3  -7   2 1747.14 38.8771   3 
   3  -7  -2 1754.79 39.6871   3 
  -3  -7   2 1633.02 38.1140   4 
   3  -7  -2 1558.76 39.2317   4 
  -3  -7   2 1752.91 40.3457   2 
   3   7  -2 1740.38 40.2793   2 
  -3   7   2 1715.94 38.2441   2 
  -3   7   2 1728.92 38.2250   4 
   3   7  -2 1740.60 38.8123   3 
  -3   7   2 1752.08 39.6782   3 
  -1  -7   2 5.96085 2.00534   2 
   1  -7  -2 8.53633 1.79562   3 
  -1  -7   2 8.77846 1.33351   3 
   1  -7  -2 7.73897 1.30051   4 
   1  -7  -2 9.24232 1.21490   2 
   1   7  -2 8.95548 1.93853   2 
  -1   7   2 8.99541 1.72353   3 
   1   7  -2 10.0773 1.31844   3 
  -1   7   2 8.63718 1.20884   2 
  -1   7   2 10.8255 1.23526   4 
   1  -7   2 5.15780 1.11001   3 
  -1  -7  -2 4.42513 1.56803   3 
  -1  -7  -2 6.61587 1.28482   4 
   1  -7   2 4.69379 1.62437   2 
  -1  -7  -2 5.03162 1.34054   2 
   1   7   2 3.57099 1.23901   2 
  -1   7  -2 4.35348 1.82311   2 
   1   7   2 4.08144 0.96120   4 
  -1   7  -2 4.19829 1.06178   3 
   1   7   2 5.33268 1.41504   3 
  -3  -7  -2 12.6845 1.74627   4 
   3  -7   2 15.3201 1.58749   4 
   3  -7   2 13.5494 2.16107   2 
  -3  -7  -2 15.7103 2.23229   3 
  -3  -7  -2 13.1038 1.91059   2 
  -3   7  -2 15.2048 1.59905   3 
  -3   7  -2 12.5559 2.27035   2 
   3   7   2 14.6338 2.01790   2 
   3   7   2 12.6495 1.88660   3 
  -5  -7  -2 330.298 9.85192   3 
  -5  -7  -2 340.086 9.21816   4 
   5  -7   2 334.834 8.04015   4 
  -5  -7  -2 338.434 10.1869   2 
  -5   7  -2 337.469 9.18959   3 
  -5   7  -2 332.082 10.4332   2 
   5   7   2 334.966 8.65539   4 
  -5   7  -2 337.378 9.12095   3 
   5   7   2 333.903 9.72838   3 
   5   7   2 333.671 10.0562   2 
  -7  -7  -2 603.070 16.5597   2 
  -7  -7  -2 582.542 15.6743   3 
   7   7   2 588.876 14.2385   4 
  -7   7  -2 576.080 14.9198   3 
  -7   7  -2 583.819 13.4995   4 
   7   7   2 572.695 15.4794   3 
  -7   7  -2 588.132 16.2774   2 
   7   7   2 584.288 16.0968   2 
  -9  -7  -2 372.217 10.8324   4 
  -9  -7  -2 388.326 12.9351   2 
  -9  -7  -2 391.873 11.8375   3 
  -9   7  -2 389.992 11.1234   3 
  -9   7  -2 392.902 12.5526   2 
   9   7   2 387.788 10.1170   4 
   9   7   2 374.631 11.5538   3 
  -9   7  -2 382.043 9.48350   4 
  -9   7  -2 387.619 12.3196   2 
   9   7   2 388.754 12.4803   2 
  11  -7   2 724.172 19.4339   3 
 -11  -7  -2 735.974 21.2370   2 
 -11  -7  -2 714.243 19.6193   3 
 -11  -7  -2 727.666 18.5404   4 
 -11   7  -2 710.992 18.7599   3 
  11   7   2 664.760 22.1900   2 
  11   7   2 740.413 17.5933   4 
  11   7   2 727.396 19.5406   3 
 -11   7  -2 712.818 20.3578   2 
 -13  -7  -2 265.171 9.16607   4 
  13  -7   2 259.748 10.2272   3 
 -13  -7  -2 268.024 10.5346   3 
 -13  -7  -2 266.085 12.1143   2 
  13   7   2 264.389 11.7567   2 
  13   7   2 253.757 10.1380   3 
 -13   7  -2 273.141 9.85087   3 
 -13   7  -2 253.586 7.69774   4 
  13   7   2 262.204 7.90091   4 
 -13   7  -2 259.883 10.9784   2 
 -15  -7  -2 128.261 6.88539   4 
 -15  -7  -2 138.759 8.74204   3 
  15  -7   2 119.713 8.19573   3 
 -15  -7  -2 118.412 10.1350   2 
 -15   7  -2 122.536 7.63810   3 
  15   7   2 131.043 7.88138   3 
  15   7   2 135.137 5.38215   4 
  15   7   2 124.723 9.74697   2 
 -15   7  -2 125.177 5.61340   4 
 -15   7  -2 126.955 9.06701   2 
 -17  -7  -2 182.325 12.8411   2 
 -17  -7  -2 156.793 10.4293   3 
 -17  -7  -2 164.090 8.45054   4 
  17  -7   2 176.806 10.4304   3 
  17   7   2 164.074 9.92501   3 
 -17   7  -2 151.767 7.02213   4 
 -17   7  -2 154.561 17.0583   2 
 -17   7  -2 154.307 9.36925   3 
  17   7   2 178.287 12.3700   2 
  17   7   2 173.315 6.64514   4 
  19  -7   2 52.1017 8.88966   3 
 -19  -7  -2 50.5486 8.79575   2 
 -19  -7  -2 51.4930 6.29576   4 
 -19  -7  -2 46.8148 7.41817   3 
  19   7   2 52.3084 5.16074   4 
 -19   7  -2 56.8629 7.04911   3 
 -19   7  -2 47.9539 4.94020   4 
 -19   7  -2 48.7904 8.23863   2 
  19   7   2 47.4461 6.89861   3 
  19   7   2 63.0167 9.72342   2 
  21  -7   2 9.29528 7.50119   3 
 -21  -7  -2 14.0085 9.45219   2 
  21   7   2 15.2597 6.35171   3 
 -21   7  -2 6.84970 7.08034   3 
 -21   7  -2 29.3695 9.32956   2 
 -22  -8   2 31.0603 10.9691   2 
  22   8  -2 30.3793 8.58694   3 
 -22   8   2 47.7791 9.53256   2 
 -22   8   2 35.1340 6.06233   4 
 -20  -8   2 1.82207 8.20553   2 
 -20  -8   2 9.72928 3.63360   4 
 -20   8   2 17.7520 4.61707   4 
 -20   8   2 11.0368 2.77572   4 
  20   8  -2 0.35967 5.22452   3 
 -20   8   2 11.0166 6.64625   2 
 -20   8   2 6.14997 6.95372   3 
 -18  -8   2 33.4656 7.80530   2 
 -18  -8   2 39.2420 6.71376   3 
 -18  -8   2 33.9024 3.87569   4 
 -18   8   2 19.5749 6.32675   3 
 -18   8   2 35.4176 4.32362   4 
 -18   8   2 30.8990 6.51066   2 
  18   8  -2 34.9685 5.84355   3 
 -18   8   2 34.9017 3.24050   4 
  18   8  -2 36.9352 7.97404   2 
 -16  -8   2 19.6742 6.32913   2 
 -16  -8   2 11.4929 2.50019   4 
 -16  -8   2 15.0958 4.57810   3 
 -16   8   2 19.7008 3.18521   4 
  16   8  -2 16.3029 4.44923   3 
 -16   8   2 25.3095 5.22894   3 
  16   8  -2 12.3096 5.17999   2 
 -16   8   2 16.4998 4.89235   2 
 -16   8   2 18.2273 1.76253   4 
 -14  -8   2 130.653 5.47147   4 
 -14  -8   2 108.445 7.62382   3 
 -14  -8   2 129.126 9.48723   2 
 -14   8   2 125.415 3.73758   4 
 -14   8   2 111.788 7.86653   2 
 -14   8   2 126.372 5.27904   4 
  14   8  -2 114.819 7.09929   3 
  14   8  -2 131.492 9.83463   2 
 -14   8   2 130.385 8.46395   3 
 -12  -8   2 238.039 7.37439   4 
 -12  -8   2 239.286 9.41428   3 
 -12  -8   2 231.494 11.2390   2 
 -12   8   2 241.442 7.12605   4 
  12   8  -2 234.947 9.28292   3 
  12   8  -2 222.344 10.9088   2 
 -12   8   2 248.526 5.87538   4 
 -12   8   2 230.729 9.98973   3 
 -12   8   2 238.632 9.41839   2 
 -10  -8   2 16.3348 2.91275   3 
 -10  -8   2 21.3140 2.33690   4 
 -10  -8   2 19.3474 4.16027   2 
  10   8  -2 20.4972 4.40374   2 
 -10   8   2 19.3646 3.06169   2 
  10   8  -2 21.0881 2.86616   3 
 -10   8   2 21.0351 2.10898   4 
 -10   8   2 23.5853 3.87995   3 
  -8  -8   2 843.724 20.8008   3 
  -8  -8   2 819.220 22.5442   2 
  -8  -8   2 814.572 19.2306   4 
   8   8  -2 819.840 20.7537   3 
  -8   8   2 808.577 20.2637   2 
  -8   8   2 805.816 21.5118   3 
   8   8  -2 821.260 22.4214   2 
  -8   8   2 786.285 18.8261   4 
  -6  -8   2 1370.14 34.0597   2 
   6  -8  -2 1368.79 30.9779   4 
  -6  -8   2 1397.86 32.4682   3 
  -6  -8   2 1358.17 31.1763   4 
  -6   8   2 1376.07 31.8738   2 
  -6   8   2 1396.65 30.9378   4 
  -6   8   2 1375.43 33.1501   3 
   6   8  -2 1373.46 32.3982   3 
  -6   8   2 1376.65 31.8054   2 
   6   8  -2 1376.91 34.0360   2 
   4  -8  -2 991.926 23.0166   4 
  -4  -8   2 980.088 23.6660   3 
  -4  -8   2 998.899 25.1914   2 
  -4   8   2 999.186 24.4443   3 
  -4   8   2 982.078 23.0951   2 
  -4   8   2 999.461 22.6331   4 
   4   8  -2 1004.68 25.2373   2 
   4   8  -2 996.424 23.6001   3 
  -2  -8   2 1009.64 24.7429   2 
  -2  -8   2 1013.56 23.3530   3 
   2  -8  -2 985.048 23.1068   4 
   2  -8  -2 998.158 24.1801   3 
  -2  -8   2 942.595 22.4943   4 
  -2   8   2 980.526 22.6182   4 
  -2   8   2 993.628 22.8174   2 
   2   8  -2 1009.94 23.2561   3 
  -2   8   2 983.334 24.0775   3 
   2   8  -2 1015.00 24.8658   2 
   0  -8   2 10.6854 1.13262   4 
   0  -8   2 10.0188 2.25482   2 
   0  -8  -2 10.8814 1.96293   3 
   0  -8  -2 12.4369 1.50789   2 
   0  -8   2 9.65179 1.53988   3 
   0   8   2 9.54528 1.75155   3 
   0   8   2 10.4864 1.24188   4 
   0   8   2 11.0488 1.53370   2 
   0   8  -2 10.6930 2.18236   2 
   0   8  -2 13.8332 1.54079   3 
   2  -8   2 173.301 6.59222   2 
  -2  -8  -2 184.003 5.99318   2 
  -2  -8  -2 169.903 6.19857   3 
  -2  -8  -2 185.434 5.70333   4 
   2  -8   2 172.996 4.52167   4 
   2  -8   2 175.164 5.46854   3 
   2   8   2 178.153 5.97186   2 
   2   8   2 175.582 6.07831   3 
   2   8   2 176.765 5.11965   4 
  -2   8  -2 171.301 5.31895   3 
  -2   8  -2 171.373 6.81274   2 
   4  -8   2 137.402 5.77560   2 
   4  -8   2 131.575 4.01653   4 
  -4  -8  -2 132.779 4.83573   4 
  -4  -8  -2 129.753 5.43056   3 
  -4  -8  -2 132.437 5.58105   2 
   4   8   2 131.447 5.25490   3 
  -4   8  -2 130.780 6.07708   2 
  -4   8  -2 130.388 4.71221   3 
   4   8   2 134.938 4.30472   4 
   4   8   2 135.898 5.52438   2 
  -6  -8  -2 12.3717 2.25541   3 
  -6  -8  -2 11.5522 2.92774   4 
  -6  -8  -2 11.1896 2.60974   2 
  -6   8  -2 7.16434 1.75665   3 
  -6   8  -2 8.68278 2.64410   2 
  -6   8  -2 6.34976 1.92657   3 
   6   8   2 11.4537 1.47631   4 
   6   8   2 8.68356 1.98675   3 
   6   8   2 11.1121 2.57957   2 
  -8  -8  -2 119.817 6.58052   2 
  -8  -8  -2 113.886 5.04959   4 
  -8  -8  -2 113.349 5.67260   3 
   8   8   2 119.179 4.24047   4 
   8   8   2 112.979 5.49955   3 
   8   8   2 115.390 6.32692   2 
  -8   8  -2 110.533 5.13595   3 
  -8   8  -2 120.697 6.61821   2 
 -10  -8  -2 211.798 9.67128   2 
 -10  -8  -2 208.005 7.59183   4 
 -10  -8  -2 198.463 9.59309   3 
  10   8   2 222.551 9.49868   2 
  10   8   2 221.693 6.67794   4 
 -10   8  -2 225.723 9.19183   2 
 -10   8  -2 226.349 8.01844   3 
 -10   8  -2 229.208 9.58329   2 
  10   8   2 213.506 8.27652   3 
 -12  -8  -2 402.063 11.9033   4 
 -12  -8  -2 391.163 14.6020   2 
 -12  -8  -2 399.190 13.1874   3 
 -12   8  -2 393.421 14.2206   2 
 -12   8  -2 381.604 12.1521   3 
  12   8   2 398.434 10.6840   4 
 -12   8  -2 384.299 13.7274   2 
  12   8   2 399.546 14.4530   2 
 -12   8  -2 381.475 9.92202   4 
  12   8   2 395.865 12.9377   3 
 -14  -8  -2 109.115 7.84156   3 
 -14  -8  -2 97.3856 9.01564   2 
 -14  -8  -2 107.873 6.27696   4 
 -14   8  -2 98.6996 4.65774   4 
 -14   8  -2 97.3567 8.08257   2 
  14   8   2 116.746 7.41361   3 
  14   8   2 95.3970 9.28328   2 
  14   8   2 106.015 4.82933   4 
 -14   8  -2 111.135 6.99951   3 
 -16  -8  -2 17.5514 4.01508   4 
 -16  -8  -2 20.9289 6.11258   2 
 -16  -8  -2 18.8345 5.04554   3 
 -16   8  -2 11.8380 5.60126   2 
  16   8   2 17.1168 5.85297   2 
  16   8   2 23.4590 2.76377   4 
  16   8   2 12.2505 4.61150   3 
 -16   8  -2 16.9844 2.87039   4 
 -16   8  -2 16.3110 4.49408   3 
 -18  -8  -2 56.1784 7.59672   3 
 -18  -8  -2 56.2374 9.02861   2 
 -18  -8  -2 65.2781 7.46975   4 
  18   8   2 54.3937 4.98025   4 
 -18   8  -2 62.5538 8.33533   2 
  18   8   2 66.0537 7.25667   3 
 -18   8  -2 65.3917 5.91695   4 
 -18   8  -2 58.1811 6.58944   3 
  18   8   2 75.7007 9.73087   2 
 -20  -8  -2 23.3772 9.15251   2 
 -20  -8  -2 22.9141 5.84468   4 
  20   8   2 22.4468 3.86935   4 
 -20   8  -2 17.1299 4.41188   4 
 -20   8  -2 23.7812 6.73728   3 
 -20   8  -2 9.17405 8.16828   2 
  20   8   2 26.1368 6.58446   3 
 -22  -8  -2 13.9099 10.8339   2 
 -22   8  -2 4.77440 9.43505   2 
  22   8   2 13.7581 7.57251   3 
 -21  -9   2 0.55116 8.86518   2 
 -21  -9   2 -3.1292 4.10664   4 
 -21   9   2 1.45253 4.58980   4 
  21   9  -2 -3.2421 5.97655   3 
 -21   9   2 11.7468 7.41837   2 
 -19  -9   2 11.4332 6.22390   3 
 -19  -9   2 2.42379 2.92285   4 
 -19  -9   2 1.81217 7.68352   2 
  19   9  -2 20.0265 6.01725   3 
  19   9  -2 12.3473 8.20218   2 
 -19   9   2 6.72312 2.36885   4 
 -19   9   2 -5.7997 6.44922   3 
 -19   9   2 5.74813 3.67850   4 
 -19   9   2 9.96615 7.73325   2 
 -17  -9   2 -1.1936 4.84446   3 
 -17  -9   2 2.97392 2.69606   4 
 -17  -9   2 0.58004 5.79609   2 
  17   9  -2 4.09368 5.67533   2 
 -17   9   2 0.54012 1.51949   4 
  17   9  -2 9.14531 4.41759   3 
 -17   9   2 3.96915 2.87788   4 
 -17   9   2 -1.9118 5.05649   3 
 -17   9   2 -0.5551 4.46364   2 
 -15  -9   2 49.5632 4.21834   4 
 -15  -9   2 40.1788 6.37832   2 
 -15  -9   2 50.8400 5.83105   3 
  15   9  -2 58.7890 7.57186   2 
 -15   9   2 53.0868 4.32189   4 
 -15   9   2 47.4703 2.33292   4 
  15   9  -2 38.3100 5.43230   3 
 -15   9   2 67.9254 7.23397   2 
 -15   9   2 51.6215 6.23533   3 
 -13  -9   2 84.3667 6.79615   3 
 -13  -9   2 81.2572 4.46726   4 
 -13  -9   2 75.9231 8.16058   2 
  13   9  -2 80.1447 5.96316   3 
 -13   9   2 74.2172 3.95718   4 
 -13   9   2 75.7800 2.51186   4 
  13   9  -2 70.5636 8.07196   2 
 -13   9   2 82.6128 7.21731   3 
 -13   9   2 70.5972 6.42927   2 
 -11  -9   2 42.3481 5.78148   2 
 -11  -9   2 41.4526 4.27299   3 
 -11  -9   2 36.8623 3.07572   4 
 -11   9   2 40.5689 4.76445   3 
 -11   9   2 51.5760 4.94445   2 
 -11   9   2 42.8556 2.81240   4 
  11   9  -2 30.1317 4.87777   2 
  11   9  -2 40.1148 4.21621   3 
 -11   9   2 41.1753 1.66101   4 
  -9  -9   2 54.9610 4.50100   3 
  -9  -9   2 61.4297 5.85849   2 
  -9  -9   2 51.1526 2.96686   4 
   9   9  -2 41.3750 4.84361   2 
  -9   9   2 53.1433 2.60195   4 
  -9   9   2 49.4586 4.08486   2 
  -9   9   2 52.7352 5.26302   3 
   9   9  -2 52.1789 4.29000   3 
  -7  -9   2 153.102 7.53624   2 
  -7  -9   2 141.836 5.94423   3 
   7   9  -2 142.042 5.78552   3 
  -7   9   2 134.732 6.37662   3 
  -7   9   2 136.906 4.16028   4 
  -7   9   2 139.534 5.61818   2 
  -7   9   2 130.906 5.34774   2 
   7   9  -2 144.958 7.35652   2 
  -5  -9   2 465.635 12.5777   3 
  -5  -9   2 468.503 11.3783   4 
   5  -9  -2 460.344 11.4843   4 
  -5  -9   2 473.264 14.1545   2 
   5   9  -2 464.515 12.4647   3 
  -5   9   2 454.837 13.2227   3 
  -5   9   2 447.620 12.0185   2 
   5   9  -2 460.948 14.0019   2 
  -5   9   2 459.978 11.0528   4 
   3  -9  -2 29.7736 3.33579   3 
   3  -9  -2 33.9562 2.53501   4 
   3  -9  -2 30.5285 2.29890   2 
  -3  -9   2 37.5489 2.97478   3 
  -3  -9   2 35.9011 1.99747   4 
  -3  -9   2 38.9511 3.89859   2 
   3   9  -2 32.2562 3.56731   2 
  -3   9   2 34.9712 2.72624   2 
  -3   9   2 29.8050 3.12268   3 
   3   9  -2 36.3602 2.66035   3 
  -3   9   2 33.1555 2.00858   4 
  -1  -9   2 42.8310 2.96454   3 
   1  -9  -2 40.1409 3.45135   3 
  -1  -9   2 43.8569 3.98770   2 
   1  -9  -2 43.5500 2.71361   2 
   1  -9  -2 46.1201 2.82433   4 
  -1   9   2 45.2344 3.29241   3 
   1   9  -2 46.1757 2.70986   3 
  -1   9   2 43.4232 2.79217   2 
   1   9  -2 47.9771 4.28394   2 
  -1   9   2 45.0416 2.25273   4 
   1  -9   2 451.637 10.5913   4 
  -1  -9  -2 452.910 12.6189   3 
   1  -9   2 447.064 12.9328   2 
   1  -9   2 458.226 11.6641   3 
  -1  -9  -2 447.784 11.7938   2 
  -1   9  -2 454.847 13.1682   2 
   1   9   2 446.946 11.0730   4 
  -1   9  -2 454.397 11.5306   3 
   1   9   2 449.016 12.3844   3 
   1   9   2 454.014 11.8076   2 
  -3  -9  -2 26.1259 3.08198   2 
  -3  -9  -2 21.7955 2.13767   4 
   3  -9   2 27.5999 1.23926   4 
  -3  -9  -2 28.1219 3.19808   3 
   3  -9   2 25.2159 2.87096   2 
  -3   9  -2 30.0973 3.48273   2 
   3   9   2 28.2815 3.17227   2 
   3   9   2 16.4222 2.17902   3 
  -3   9  -2 21.3249 2.34916   3 
   3   9   2 24.4199 2.04454   4 
  -5  -9  -2 18.5290 2.58563   3 
  -5  -9  -2 22.1491 2.36190   4 
   5  -9   2 18.2222 2.72555   2 
   5  -9   2 22.3751 0.93363   4 
  -5  -9  -2 16.3189 2.80317   2 
   5  -9   2 21.1783 1.67306   4 
  -5   9  -2 25.5145 3.44554   2 
  -5   9  -2 21.9377 2.37982   3 
   5   9   2 20.5199 1.97371   4 
   5   9   2 16.9551 2.47015   3 
   5   9   2 18.9221 2.78340   2 
  -7  -9  -2 182.583 7.15971   3 
  -7  -9  -2 174.345 7.59122   2 
  -7  -9  -2 180.671 6.31531   4 
  -7   9  -2 178.530 6.52162   3 
  -7   9  -2 175.129 6.49054   3 
   7   9   2 178.374 5.55719   4 
  -7   9  -2 181.277 7.80500   2 
   7   9   2 173.836 7.54598   2 
   7   9   2 164.712 6.78003   3 
  -9  -9  -2 7.42286 2.05472   4 
  -9  -9  -2 3.62171 2.98401   2 
  -9   9  -2 12.7832 3.60347   2 
   9   9   2 7.35746 2.55962   3 
   9   9   2 7.02274 2.99522   2 
   9   9   2 9.73307 1.67823   4 
  -9   9  -2 9.21325 2.45012   3 
 -11  -9  -2 282.489 9.42925   4 
 -11  -9  -2 272.800 10.4076   3 
 -11  -9  -2 280.705 11.8665   2 
 -11   9  -2 302.508 11.8744   2 
  11   9   2 280.045 8.21212   4 
  11   9   2 268.127 11.3273   2 
 -11   9  -2 284.850 9.77849   3 
 -11   9  -2 282.490 11.2425   2 
  11   9   2 278.972 10.2631   3 
 -13  -9  -2 3.42836 4.23574   2 
 -13  -9  -2 9.53282 2.98108   4 
 -13  -9  -2 8.97094 3.75620   3 
 -13   9  -2 3.38346 3.80283   2 
  13   9   2 5.63026 1.93152   4 
  13   9   2 6.14188 3.17615   3 
  13   9   2 3.40694 4.56790   2 
 -13   9  -2 1.31145 4.46496   2 
 -15  -9  -2 3.27824 2.82605   4 
 -15  -9  -2 1.54855 4.87020   2 
 -15  -9  -2 8.93046 4.14787   3 
 -15   9  -2 8.15334 4.53100   2 
  15   9   2 4.67182 3.56129   3 
  15   9   2 0.07588 5.13285   2 
 -15   9  -2 15.7199 5.90154   2 
 -15   9  -2 6.29014 3.77575   3 
  15   9   2 5.80143 1.99410   4 
 -17  -9  -2 124.368 12.4046   2 
 -17  -9  -2 139.347 10.5718   3 
 -17  -9  -2 135.867 8.44409   4 
 -17   9  -2 124.158 12.9013   2 
 -17   9  -2 143.347 11.6379   2 
  17   9   2 145.555 6.42560   4 
  17   9   2 163.268 12.5596   2 
 -17   9  -2 139.347 9.46976   3 
  17   9   2 148.305 9.73616   3 
 -19  -9  -2 39.0691 9.32033   2 
 -19  -9  -2 33.9993 7.33416   3 
 -19  -9  -2 35.8133 5.89278   4 
  19   9   2 28.7037 3.71093   4 
 -19   9  -2 37.7353 8.00791   2 
  19   9   2 32.3222 6.62953   3 
  19   9   2 32.9646 8.38871   2 
 -19   9  -2 25.3573 6.13186   3 
 -19   9  -2 33.1801 4.15298   4 
 -21  -9  -2 5.85277 10.1142   2 
 -21   9  -2 -13.090 8.73638   2 
 -21   9  -2 13.6228 7.10833   3 
  21   9   2 8.64140 6.74589   3 
 -22 -10   2 37.3445 11.6425   2 
 -22  10   2 42.4394 9.79071   2 
  22  10  -2 36.4627 8.50280   3 
 -20 -10   2 42.9165 5.09635   4 
 -20 -10   2 29.2961 9.76576   2 
 -20  10   2 46.0015 8.46393   2 
 -20  10   2 38.7180 4.11506   4 
 -20  10   2 18.5447 7.74700   3 
  20  10  -2 38.4460 7.10835   3 
 -18 -10   2 9.16766 5.99009   3 
 -18 -10   2 11.4097 7.53384   2 
 -18 -10   2 17.2734 3.25286   4 
  18  10  -2 5.47915 7.08607   2 
 -18  10   2 20.9367 6.17191   2 
 -18  10   2 15.7896 6.61266   3 
  18  10  -2 20.7714 5.57543   3 
 -16 -10   2 8.47293 6.04795   2 
 -16 -10   2 13.7625 2.88643   4 
 -16 -10   2 9.01868 4.76653   3 
  16  10  -2 5.45263 3.74926   3 
 -16  10   2 9.47637 5.44901   3 
 -16  10   2 1.95884 4.33584   2 
  16  10  -2 9.81869 6.40038   2 
 -14 -10   2 128.900 10.3587   2 
 -14 -10   2 146.759 6.06462   4 
 -14 -10   2 145.351 8.55851   3 
 -14  10   2 138.516 9.26294   3 
  14  10  -2 129.420 7.96909   3 
  14  10  -2 151.086 10.8658   2 
 -14  10   2 124.590 8.32944   2 
 -12 -10   2 456.570 14.4503   3 
 -12 -10   2 452.321 12.2580   4 
 -12 -10   2 456.278 16.6571   2 
 -12  10   2 468.823 14.3719   2 
 -12  10   2 460.405 15.2457   3 
  12  10  -2 426.270 16.1680   2 
  12  10  -2 441.122 14.2645   3 
 -10 -10   2 189.080 6.33441   4 
 -10 -10   2 209.834 10.1858   2 
 -10 -10   2 196.319 8.26818   3 
  10  10  -2 191.618 10.0092   2 
  10  10  -2 196.587 8.02022   3 
 -10  10   2 204.492 7.84367   2 
 -10  10   2 197.057 7.93194   2 
 -10  10   2 184.425 9.97815   3 
 -10  10   2 194.396 5.21493   4 
  -8 -10   2 35.5458 4.42862   2 
  -8 -10   2 31.1125 2.57417   4 
  -8 -10   2 36.8431 3.96038   3 
  -8  10   2 34.4432 1.98897   4 
   8  10  -2 34.2339 3.59186   3 
  -8  10   2 39.3375 4.38897   3 
   8  10  -2 39.3729 4.69914   2 
  -8  10   2 33.7558 3.43606   2 
  -8  10   2 34.1952 4.06969   2 
  -8  10   2 40.5731 4.51913   3 
  -6 -10   2 522.529 12.7589   4 
   6 -10  -2 512.206 12.5601   4 
  -6 -10   2 510.271 15.7972   2 
  -6 -10   2 507.053 14.1106   3 
   6  10  -2 506.850 15.7303   2 
   6  10  -2 512.293 14.0101   3 
  -6  10   2 515.709 13.3695   2 
  -6  10   2 516.709 13.6744   2 
  -6  10   2 519.403 14.8050   3 
  -6  10   2 533.021 12.1483   4 
  -4 -10   2 320.288 8.26326   4 
  -4 -10   2 322.088 9.49573   3 
  -4 -10   2 322.870 10.9147   2 
   4 -10  -2 312.754 8.63613   4 
  -4  10   2 310.329 9.02219   2 
  -4  10   2 315.784 10.0736   3 
   4  10  -2 318.852 9.27722   3 
   4  10  -2 335.348 10.9755   2 
  -4  10   2 311.769 7.96974   4 
  -2 -10   2 25.1202 2.93518   3 
  -2 -10   2 24.3312 3.19459   2 
   2 -10  -2 22.1332 2.60522   4 
   2 -10  -2 25.0769 2.45031   2 
   2 -10  -2 25.7687 2.87753   3 
   2  10  -2 21.0391 3.34526   2 
  -2  10   2 28.2494 3.13131   3 
   2  10  -2 24.0407 2.49305   3 
  -2  10   2 26.5786 2.77235   2 
  -2  10   2 29.0193 1.90203   4 
   0 -10  -2 375.477 10.2802   2 
   0 -10  -2 372.110 11.2241   3 
   0 -10   2 383.939 10.4552   3 
   0 -10   2 390.665 11.7504   2 
   0 -10   2 376.879 9.19496   4 
   0  10   2 378.224 11.0990   3 
   0  10   2 374.249 9.50274   4 
   0  10  -2 393.099 10.2645   3 
   0  10  -2 391.648 11.8969   2 
   0  10   2 370.433 10.3295   2 
   2 -10   2 1159.66 27.0303   3 
   2 -10   2 1143.88 28.2904   2 
  -2 -10  -2 1151.67 28.0139   3 
  -2 -10  -2 1163.69 27.4652   2 
  -2 -10  -2 1172.15 26.9705   4 
   2 -10   2 1135.36 25.5542   4 
   2  10   2 1158.57 27.3366   2 
   2  10   2 1104.28 26.1850   4 
   2  10   2 1125.59 27.7295   3 
  -2  10  -2 1119.82 28.4669   2 
  -2  10  -2 1166.70 26.8822   3 
  -4 -10  -2 325.214 10.1809   2 
  -4 -10  -2 332.574 9.34798   4 
  -4 -10  -2 334.941 10.3498   3 
   4 -10   2 322.712 10.4933   2 
   4 -10   2 318.147 7.53810   4 
   4 -10   2 316.256 8.31504   4 
   4  10   2 319.326 9.95186   3 
  -4  10  -2 316.504 10.7117   2 
   4  10   2 327.132 8.60491   4 
   4  10   2 329.958 10.1156   2 
  -4  10  -2 319.444 9.21864   3 
  -6 -10  -2 266.366 9.17736   3 
  -6 -10  -2 264.287 8.25195   4 
  -6 -10  -2 272.814 9.57513   2 
   6  10   2 256.910 9.41864   2 
   6  10   2 269.837 7.49130   4 
  -6  10  -2 269.714 9.90594   2 
  -6  10  -2 259.810 8.52546   3 
   6  10   2 259.343 8.88290   3 
  -6  10  -2 266.885 8.40452   3 
  -8 -10  -2 350.459 12.3205   2 
  -8 -10  -2 343.406 12.5798   3 
  -8 -10  -2 349.453 10.4854   4 
  -8  10  -2 359.146 12.3407   2 
   8  10   2 354.914 9.59881   4 
   8  10   2 357.970 11.3456   3 
  -8  10  -2 359.634 10.8716   3 
   8  10   2 372.911 12.2474   2 
  -8  10  -2 357.879 10.8660   3 
 -10 -10  -2 368.491 11.0255   4 
 -10 -10  -2 353.300 12.0870   3 
 -10 -10  -2 361.706 13.1182   2 
 -10  10  -2 344.984 12.4034   2 
  10  10   2 354.057 11.8094   3 
  10  10   2 357.336 9.83993   4 
 -10  10  -2 345.038 11.1564   3 
 -12 -10  -2 436.798 13.0205   4 
 -12 -10  -2 440.083 14.4488   3 
 -12 -10  -2 427.353 15.7997   2 
 -12  10  -2 437.772 15.5241   2 
 -12  10  -2 445.914 13.4417   3 
  12  10   2 428.243 15.4257   2 
 -12  10  -2 423.574 14.8030   2 
  12  10   2 403.540 13.8051   3 
  12  10   2 431.556 11.7143   4 
 -14 -10  -2 45.9683 5.37051   4 
 -14 -10  -2 45.0150 5.51238   3 
 -14 -10  -2 55.4452 7.15005   2 
 -14  10  -2 54.5016 5.47091   3 
  14  10   2 64.5238 7.24447   2 
  14  10   2 54.3646 4.00015   4 
  14  10   2 56.5770 5.87988   3 
 -14  10  -2 53.1253 7.33155   2 
 -14  10  -2 49.3192 6.12804   2 
 -16 -10  -2 4.28988 4.92632   3 
 -16 -10  -2 11.1054 6.04203   2 
 -16 -10  -2 8.98599 3.83596   4 
 -16  10  -2 12.8695 4.71001   3 
 -16  10  -2 1.70796 6.25964   2 
  16  10   2 13.6871 4.34888   3 
  16  10   2 9.19212 2.41262   4 
 -16  10  -2 5.93569 5.73819   2 
  16  10   2 9.26126 6.27884   2 
 -18 -10  -2 81.8150 8.27035   4 
 -18 -10  -2 73.0883 8.44287   3 
 -18 -10  -2 96.1858 11.1044   2 
 -18  10  -2 84.1967 8.00276   3 
 -18  10  -2 106.185 11.0406   2 
 -18  10  -2 72.0742 9.07942   2 
  18  10   2 93.0899 9.51852   3 
  18  10   2 81.0170 5.89496   4 
  18  10   2 90.5633 10.4264   2 
 -20 -10  -2 63.6958 10.7506   2 
 -20 -10  -2 51.6618 7.12854   4 
  20  10   2 57.1638 6.41929   4 
 -20  10  -2 48.9272 7.87788   3 
  20  10   2 67.7413 8.43676   3 
 -20  10  -2 49.0411 9.77016   2 
 -21 -11   2 -2.5021 9.71491   2 
 -21 -11   2 14.9494 5.15196   4 
 -21  11   2 -0.4409 8.04592   2 
  21  11  -2 13.1269 7.05415   3 
 -19 -11   2 10.4869 8.00144   2 
 -19 -11   2 3.79969 3.45688   4 
 -19  11   2 20.9038 7.37609   3 
  19  11  -2 0.57673 5.27641   3 
 -19  11   2 1.56557 6.57419   2 
 -17 -11   2 6.13822 3.12739   4 
 -17 -11   2 3.12036 5.32266   3 
 -17 -11   2 7.60812 6.95281   2 
  17  11  -2 11.8117 4.96937   3 
  17  11  -2 -4.1871 6.22193   2 
 -17  11   2 0.28720 5.64050   3 
 -17  11   2 1.84864 4.85560   2 
 -15 -11   2 -1.3555 4.02077   3 
 -15 -11   2 3.47852 6.52332   2 
 -15 -11   2 1.12656 2.15928   4 
 -15  11   2 3.30667 4.01083   2 
  15  11  -2 1.99338 5.27401   2 
  15  11  -2 2.93085 3.54326   3 
 -15  11   2 1.17493 4.76014   3 
 -13 -11   2 25.4401 2.85374   4 
 -13 -11   2 23.7345 4.29671   3 
 -13 -11   2 28.1675 6.02133   2 
  13  11  -2 34.5853 4.57265   3 
 -13  11   2 31.9710 4.46594   2 
  13  11  -2 22.3650 5.28216   2 
 -13  11   2 19.2374 4.83977   3 
 -13  11   2 29.7206 4.99673   2 
 -11 -11   2 -3.5736 3.71495   2 
 -11 -11   2 1.13460 1.63225   4 
 -11 -11   2 -3.0506 2.62218   3 
 -11  11   2 2.50449 3.11099   2 
 -11  11   2 -3.2238 3.26328   3 
 -11  11   2 1.02699 3.08168   3 
  11  11  -2 -2.1787 3.75935   2 
  11  11  -2 3.02944 2.53801   3 
 -11  11   2 -3.2700 2.64974   2 
  -9 -11   2 10.3136 1.89989   4 
  -9 -11   2 20.2720 4.31476   2 
  -9  11   2 10.1634 2.49661   2 
  -9  11   2 8.04431 3.07379   3 
  -9  11   2 11.5671 1.11535   4 
  -9  11   2 13.2834 3.02074   2 
   9  11  -2 5.30710 3.56004   2 
   9  11  -2 11.4336 2.75168   3 
  -7 -11   2 51.9827 5.84983   2 
   7 -11  -2 54.6772 2.65104   4 
  -7 -11   2 57.8984 3.12361   4 
  -7 -11   2 53.4378 4.42727   3 
   7  11  -2 55.2015 4.16642   3 
  -7  11   2 54.8762 2.22426   4 
  -7  11   2 58.7930 3.93649   2 
  -7  11   2 56.8189 4.79211   3 
  -7  11   2 54.3663 4.29310   2 
   7  11  -2 48.5310 5.86336   2 
  -5 -11   2 0.42972 1.11372   4 
  -5 -11   2 2.68603 1.82869   3 
   5 -11  -2 0.27891 1.34329   4 
  -5 -11   2 -4.6051 2.20018   2 
   5  11  -2 2.12843 2.51837   2 
  -5  11   2 -0.7583 1.73643   2 
  -5  11   2 1.90065 2.06256   3 
  -5  11   2 1.58463 0.90169   4 
   5  11  -2 2.43228 1.67104   3 
   3 -11  -2 28.0975 3.48861   3 
   3 -11  -2 21.0333 2.24281   4 
   3 -11  -2 22.3622 2.65190   2 
  -3 -11   2 24.1298 1.93751   4 
  -3 -11   2 25.5063 3.39231   2 
  -3 -11   2 25.1671 2.80751   3 
  -3  11   2 25.9107 3.06297   3 
  -3  11   2 21.3339 1.78045   4 
  -3  11   2 20.9273 2.48237   2 
   3  11  -2 20.1101 3.29937   2 
   3  11  -2 28.3456 2.88786   3 
  -1 -11   2 23.0627 3.11900   2 
   1 -11  -2 28.3123 2.83785   4 
  -1 -11   2 23.2139 2.59237   3 
   1 -11  -2 25.2849 2.78489   2 
   1 -11  -2 21.6592 3.16110   3 
  -1  11   2 22.9763 2.77838   3 
  -1  11   2 23.0651 2.52945   2 
  -1  11   2 23.8850 1.89083   4 
   1  11  -2 25.7277 2.76271   3 
   1  11  -2 21.6387 3.30519   2 
   1 -11   2 -0.7457 2.08749   2 
   1 -11   2 -2.7815 1.51751   3 
  -1 -11  -2 2.20163 1.61710   2 
  -1 -11  -2 3.04558 2.10726   3 
  -1  11  -2 -0.2859 1.30255   3 
  -1  11  -2 1.48683 2.32205   2 
   1  11   2 0.22582 1.70559   2 
   1  11   2 0.09544 0.97126   4 
   1  11   2 0.10977 1.62193   3 
   3 -11   2 70.0073 2.28435   4 
  -3 -11  -2 68.5686 4.53129   2 
   3 -11   2 72.5603 4.03153   3 
  -3 -11  -2 72.0636 4.75119   3 
  -3 -11  -2 58.5769 3.74311   4 
   3 -11   2 69.6238 4.91381   2 
   3  11   2 66.7680 3.10123   4 
  -3  11  -2 73.1738 5.46983   2 
   3  11   2 59.6895 4.43812   2 
  -3  11  -2 65.2628 3.66050   3 
   3  11   2 70.5594 4.26091   3 
   5 -11   2 5.28022 2.28606   2 
  -5 -11  -2 4.26673 1.69319   4 
  -5 -11  -2 5.26529 2.32688   3 
   5 -11   2 7.79532 0.85682   4 
   5 -11   2 6.64144 1.19644   4 
  -5 -11  -2 5.69668 2.28416   2 
  -5  11  -2 4.17513 2.80213   2 
   5  11   2 6.53782 1.30112   4 
   5  11   2 5.43922 2.53864   2 
  -5  11  -2 4.33217 1.79470   3 
   5  11   2 3.87493 1.96133   3 
  -7 -11  -2 126.771 7.55856   3 
  -7 -11  -2 132.313 7.20101   2 
  -7 -11  -2 123.832 5.49629   4 
  -7  11  -2 127.950 7.33697   2 
   7  11   2 131.947 4.78067   4 
  -7  11  -2 138.327 6.11769   3 
  -7  11  -2 123.502 5.77739   3 
   7  11   2 136.354 7.14261   2 
   7  11   2 124.979 6.13813   3 
  -9 -11  -2 30.6134 4.67425   2 
  -9 -11  -2 35.6212 3.76593   4 
  -9 -11  -2 30.3233 4.11021   3 
  -9  11  -2 38.4023 4.01531   3 
   9  11   2 37.1804 5.01574   2 
   9  11   2 30.8498 3.92495   3 
  -9  11  -2 40.9630 4.48511   3 
   9  11   2 37.0139 2.79284   4 
  -9  11  -2 41.5496 5.27410   2 
 -11 -11  -2 2.42130 3.78601   2 
 -11 -11  -2 8.31411 3.62062   3 
 -11 -11  -2 8.14089 2.78827   4 
 -11  11  -2 1.92863 4.28517   2 
 -11  11  -2 5.32935 2.89539   3 
  11  11   2 3.94541 1.63146   4 
  11  11   2 6.16417 3.70750   2 
 -11  11  -2 4.18920 3.48570   2 
  11  11   2 5.44476 2.85109   3 
 -13 -11  -2 26.3553 5.50424   2 
 -13 -11  -2 22.3768 4.40083   3 
 -13 -11  -2 29.4476 4.22647   4 
  13  11   2 20.4012 5.29594   2 
 -13  11  -2 26.1092 4.20548   3 
 -13  11  -2 19.9690 4.63570   2 
  13  11   2 29.5186 3.46777   4 
  13  11   2 21.4871 4.04519   3 
 -13  11  -2 28.5635 6.10399   2 
 -15 -11  -2 4.53142 5.20912   2 
 -15 -11  -2 5.06572 4.59348   3 
 -15 -11  -2 0.73184 3.30548   4 
  15  11   2 0.66309 5.49042   2 
 -15  11  -2 -3.8893 6.00556   2 
  15  11   2 2.45950 3.71997   3 
  15  11   2 0.03101 1.92646   4 
 -15  11  -2 3.47246 4.70261   2 
 -15  11  -2 -3.5223 3.85793   3 
 -17 -11  -2 37.7469 7.04217   3 
 -17 -11  -2 43.2395 4.89657   4 
 -17 -11  -2 57.8570 8.67205   2 
  17  11   2 43.7189 6.57652   3 
  17  11   2 52.7149 8.94332   2 
 -17  11  -2 43.1861 7.68101   2 
 -17  11  -2 49.5478 9.14861   2 
 -17  11  -2 40.9700 6.45302   3 
  17  11   2 41.3583 4.60138   4 
 -19 -11  -2 -2.6418 5.33458   4 
 -19 -11  -2 -3.3000 7.85989   2 
 -19  11  -2 -10.157 5.85426   3 
 -19  11  -2 -3.2434 7.17890   2 
 -19  11  -2 -6.1478 9.06957   2 
  19  11   2 -3.3888 2.86548   4 
  19  11   2 0.93831 5.30114   3 
 -21 -11  -2 7.20924 10.1513   2 
  21  11   2 1.73120 7.09587   3 
 -21  11  -2 -19.880 8.51257   2 
 -21  11  -2 -2.4112 7.17291   3 
 -20 -12   2 47.4186 10.6153   2 
 -20 -12   2 45.1414 5.73586   4 
 -20  12   2 54.6216 11.0094   2 
 -20  12   2 49.3924 9.19176   2 
  20  12  -2 48.1077 8.22898   3 
 -18 -12   2 25.2180 6.91521   3 
 -18 -12   2 27.3851 4.32213   4 
 -18 -12   2 19.7679 7.81340   2 
 -18  12   2 17.5087 7.56504   3 
 -18  12   2 22.6915 7.58720   2 
  18  12  -2 17.7519 5.90985   3 
  18  12  -2 16.3904 7.57986   2 
 -18  12   2 19.3593 6.50357   2 
 -16 -12   2 74.5020 5.94387   4 
 -16 -12   2 79.8456 8.99138   2 
 -16 -12   2 89.2939 9.39321   3 
 -16  12   2 85.7842 8.42179   2 
  16  12  -2 80.3236 8.26588   3 
 -16  12   2 81.3420 8.94376   2 
 -16  12   2 74.7499 7.97670   3 
  16  12  -2 65.2379 8.91109   2 
 -14 -12   2 65.5345 8.12460   2 
 -14 -12   2 65.4329 7.67573   3 
 -14 -12   2 65.6244 4.92753   4 
  14  12  -2 63.9651 8.33809   2 
 -14  12   2 76.0778 7.59932   2 
 -14  12   2 90.4257 8.63051   2 
  14  12  -2 67.9029 6.99659   3 
 -14  12   2 65.2576 7.12946   3 
 -12 -12   2 152.386 10.5858   2 
 -12 -12   2 146.703 6.06132   4 
 -12 -12   2 146.838 8.42223   3 
 -12  12   2 150.088 8.88404   3 
 -12  12   2 145.547 7.78643   2 
  12  12  -2 145.574 7.91635   3 
 -12  12   2 147.709 9.38376   3 
  12  12  -2 158.137 10.7237   2 
 -12  12   2 155.549 8.77405   2 
 -10 -12   2 301.221 8.76225   4 
 -10 -12   2 282.776 12.3787   2 
 -10 -12   2 291.056 10.7440   3 
 -10  12   2 306.223 11.4614   3 
 -10  12   2 283.041 10.4564   2 
 -10  12   2 284.549 11.7037   3 
  10  12  -2 279.122 10.3586   3 
  10  12  -2 270.129 12.6143   2 
 -10  12   2 292.843 10.0200   2 
  -8 -12   2 226.391 10.6956   2 
  -8 -12   2 220.587 10.0383   3 
  -8 -12   2 240.954 7.23853   4 
  -8  12   2 230.999 8.20296   2 
   8  12  -2 233.536 10.6699   2 
  -8  12   2 246.243 5.83875   4 
   8  12  -2 243.267 8.79605   3 
  -8  12   2 246.795 9.63912   3 
  -8  12   2 229.095 8.59688   2 
   6 -12  -2 1.03473 1.37420   4 
  -6 -12   2 1.88589 2.93681   2 
  -6 -12   2 0.83659 1.19412   4 
  -6 -12   2 3.22467 2.18107   3 
  -6  12   2 -0.4981 2.13077   2 
   6  12  -2 2.72734 3.23179   2 
  -6  12   2 2.92882 0.90061   4 
   6  12  -2 0.14515 1.80875   3 
  -6  12   2 -2.1157 1.82913   3 
   4 -12  -2 281.476 8.24087   4 
   4 -12  -2 292.828 8.49450   2 
  -4 -12   2 282.896 9.35029   3 
   4 -12  -2 290.607 10.0666   3 
  -4 -12   2 281.988 7.83222   4 
  -4 -12   2 302.747 10.8758   2 
   4  12  -2 293.541 9.06617   3 
   4  12  -2 294.961 10.8630   2 
  -4  12   2 278.175 8.86345   2 
  -4  12   2 290.829 9.84751   3 
  -4  12   2 283.921 7.32632   4 
   2 -12  -2 1767.06 40.3990   2 
  -2 -12   2 1734.54 40.9737   3 
   2 -12  -2 1780.62 40.3113   4 
   2 -12  -2 1806.29 42.0640   3 
  -2 -12   2 1761.32 42.5707   2 
   2  12  -2 1764.85 40.7717   3 
  -2  12   2 1722.97 41.6318   3 
  -2  12   2 1733.15 40.4753   2 
  -2  12   2 1707.37 39.2865   4 
   2  12  -2 1816.65 42.7911   2 
   0 -12   2 97.4906 3.23263   4 
   0 -12  -2 91.7027 5.38995   3 
   0 -12   2 86.9282 5.83466   2 
   0 -12   2 88.3337 4.68047   3 
   0 -12  -2 92.4594 4.20777   4 
   0 -12  -2 88.4824 4.51275   2 
   0  12  -2 97.2217 6.19839   2 
   0  12   2 91.2236 5.04236   3 
   0  12   2 90.1353 3.43363   4 
   0  12  -2 85.3670 4.25687   3 
   0  12   2 87.8181 4.78898   2 
  -2 -12  -2 172.052 6.09592   4 
   2 -12   2 164.444 7.39198   2 
   2 -12   2 165.899 6.40423   3 
  -2 -12  -2 159.665 6.58029   2 
   2 -12   2 168.363 4.60030   4 
  -2 -12  -2 169.413 7.23156   3 
   2  12   2 160.592 6.73300   3 
   2  12   2 165.799 5.19643   4 
  -2  12  -2 167.916 6.07916   3 
  -2  12  -2 179.981 8.05422   2 
   2  12   2 166.065 6.63857   2 
  -4 -12  -2 54.6431 4.80585   3 
  -4 -12  -2 52.6447 3.79526   4 
  -4 -12  -2 52.4865 4.68319   2 
   4 -12   2 54.9472 4.86583   2 
   4 -12   2 55.0315 1.99602   4 
   4  12   2 53.4698 2.91037   4 
   4  12   2 56.4806 4.24593   3 
  -4  12  -2 49.2561 3.73910   3 
  -4  12  -2 64.2981 5.60666   2 
   4  12   2 56.7733 4.72405   2 
  -6 -12  -2 405.254 12.9607   2 
   6 -12   2 391.480 12.6372   2 
  -6 -12  -2 388.877 11.3783   4 
   6  12   2 383.764 12.1570   3 
  -6  12  -2 380.109 11.4352   3 
   6  12   2 399.051 10.4875   4 
  -6  12  -2 400.056 13.2461   2 
   6  12   2 399.395 12.6904   2 
  -8 -12  -2 175.464 8.82596   2 
  -8 -12  -2 177.989 6.95540   4 
  -8 -12  -2 164.391 8.04939   3 
   8  12   2 174.388 5.93728   4 
  -8  12  -2 179.913 9.07623   2 
   8  12   2 182.427 7.79758   3 
  -8  12  -2 188.635 7.64653   3 
  -8  12  -2 183.328 7.35685   3 
   8  12   2 181.752 8.78959   2 
 -10 -12  -2 364.608 13.8580   2 
 -10 -12  -2 345.576 10.9595   4 
 -10 -12  -2 314.171 12.1118   3 
 -10  12  -2 346.675 11.4130   3 
  10  12   2 345.610 13.2071   2 
  10  12   2 329.212 11.8101   3 
  10  12   2 343.156 9.77157   4 
 -10  12  -2 345.197 11.5552   3 
 -10  12  -2 350.382 13.4851   2 
 -12 -12  -2 51.6062 6.02041   3 
 -12 -12  -2 48.8720 6.66814   2 
 -12 -12  -2 45.3725 5.17285   4 
 -12  12  -2 41.2089 5.57237   2 
 -12  12  -2 53.2015 5.43799   3 
  12  12   2 51.8010 3.79590   4 
  12  12   2 45.3168 4.92406   3 
 -12  12  -2 55.3208 6.87443   2 
  12  12   2 53.7852 6.63400   2 
 -14 -12  -2 57.0784 6.17824   4 
 -14 -12  -2 47.6853 5.99706   3 
 -14 -12  -2 62.9245 7.93055   2 
 -14  12  -2 59.1954 5.94779   3 
 -14  12  -2 62.1148 8.19140   2 
 -14  12  -2 53.3035 6.60221   2 
  14  12   2 56.7203 4.35798   4 
  14  12   2 55.7751 7.44971   2 
 -16 -12  -2 91.4706 7.52943   4 
 -16 -12  -2 56.0789 7.36921   3 
 -16 -12  -2 62.9427 8.74463   2 
  16  12   2 83.8989 5.34663   4 
  16  12   2 87.6220 9.54771   2 
  16  12   2 77.3272 8.72431   3 
 -16  12  -2 70.8049 7.05863   3 
 -16  12  -2 72.7601 8.25231   2 
 -16  12  -2 83.1845 9.51575   2 
 -18 -12  -2 94.8303 11.6283   2 
 -18 -12  -2 78.6656 9.34496   4 
  18  12   2 91.6980 11.0079   2 
 -18  12  -2 93.7925 11.7233   2 
  18  12   2 104.513 10.2924   3 
  18  12   2 99.1326 6.48354   4 
 -18  12  -2 86.9360 8.46492   3 
 -18  12  -2 80.4176 9.91874   2 
 -20 -12  -2 47.2958 8.18701   4 
 -20 -12  -2 45.0820 11.1861   2 
 -20  12  -2 47.7351 8.73634   3 
  20  12   2 46.5410 5.29416   4 
  20  12   2 44.4066 8.04069   3 
 -20  12  -2 60.5481 10.7580   2 
 -21 -13   2 15.2762 11.1782   2 
 -21 -13   2 13.7072 6.05887   4 
 -21  13   2 17.5045 11.1281   2 
  21  13  -2 33.6000 8.18831   3 
 -21  13   2 10.8175 9.16462   2 
 -19 -13   2 22.1783 4.81250   4 
 -19 -13   2 32.6684 9.21844   2 
  19  13  -2 18.8686 6.57046   3 
 -19  13   2 19.8025 8.98930   2 
 -19  13   2 12.2148 7.82185   3 
 -19  13   2 16.4837 6.91882   2 
 -17 -13   2 18.1131 7.63077   2 
 -17 -13   2 15.1866 6.21207   3 
 -17 -13   2 16.6623 3.24321   4 
  17  13  -2 16.9948 8.36110   2 
 -17  13   2 27.5462 6.40262   2 
 -17  13   2 31.9094 7.44186   2 
  17  13  -2 24.8624 6.42332   3 
 -17  13   2 14.0302 6.39063   3 
 -15 -13   2 3.34512 6.19734   2 
 -15 -13   2 9.04923 2.92089   4 
 -15 -13   2 7.52503 4.80128   3 
  15  13  -2 5.05124 6.70230   2 
 -15  13   2 2.66233 5.38670   3 
  15  13  -2 5.59782 3.95508   3 
 -15  13   2 9.96468 5.84072   2 
 -15  13   2 6.24771 4.43511   2 
 -15  13   2 10.3691 5.92867   3 
 -13 -13   2 78.8548 7.77939   3 
 -13 -13   2 70.8474 8.05333   2 
 -13  13   2 78.4092 8.02884   3 
  13  13  -2 63.7111 7.57875   2 
 -13  13   2 81.6540 8.80952   3 
  13  13  -2 78.4288 6.92845   3 
 -13  13   2 90.5001 7.34088   2 
 -11 -13   2 6.29149 2.09096   4 
 -11 -13   2 8.06004 3.53968   3 
 -11 -13   2 10.0382 4.31700   2 
  11  13  -2 10.7625 3.34419   3 
 -11  13   2 11.0856 3.90553   2 
 -11  13   2 11.5949 3.88012   3 
 -11  13   2 12.6380 3.26701   2 
 -11  13   2 7.87142 3.93209   3 
  11  13  -2 9.72932 5.10031   2 
  -9 -13   2 47.5635 6.23323   2 
  -9 -13   2 53.5969 5.68594   3 
  -9 -13   2 46.3860 3.56972   4 
  -9  13   2 60.6909 6.93496   3 
  -9  13   2 50.6442 4.57581   2 
  -9  13   2 53.2128 5.48809   2 
   9  13  -2 39.7061 5.56267   2 
  -9  13   2 49.9542 5.19607   3 
   9  13  -2 55.0372 5.15134   3 
  -7 -13   2 12.4509 1.99258   4 
  -7 -13   2 16.3217 4.14856   2 
  -7 -13   2 19.1815 3.41896   3 
   7 -13  -2 16.6243 1.73614   4 
  -7  13   2 13.5610 1.41326   4 
  -7  13   2 8.95966 2.85502   3 
   7  13  -2 18.9803 4.54640   2 
   7  13  -2 12.0148 2.78542   3 
  -7  13   2 16.8021 3.13543   2 
   5 -13  -2 154.413 5.58923   4 
  -5 -13   2 170.116 7.13785   3 
  -5 -13   2 162.045 5.34752   4 
  -5 -13   2 158.299 8.21106   2 
  -5  13   2 158.750 6.59137   2 
  -5  13   2 153.360 7.23901   3 
  -5  13   2 155.689 4.50193   4 
   5  13  -2 160.922 8.45603   2 
   5  13  -2 160.795 6.52238   3 
  -3 -13   2 6.58262 1.37627   4 
   3 -13  -2 2.24959 2.44567   3 
   3 -13  -2 5.23427 1.88334   2 
  -3 -13   2 1.15193 2.05213   3 
   3 -13  -2 1.06844 1.65765   4 
  -3 -13   2 9.08727 3.26333   2 
   3  13  -2 3.42530 1.81783   3 
  -3  13   2 7.42083 2.55001   3 
   3  13  -2 6.07658 3.17473   2 
  -3  13   2 0.83081 2.05704   2 
  -3  13   2 7.02490 1.24603   4 
  -1 -13   2 240.364 9.64562   2 
  -1 -13   2 254.266 8.54014   3 
   1 -13  -2 241.834 9.10540   3 
   1 -13  -2 246.513 7.78763   4 
   1 -13  -2 249.299 8.08799   2 
  -1 -13   2 241.361 6.76658   4 
  -1  13   2 239.160 8.87701   3 
  -1  13   2 247.729 6.78417   4 
  -1  13   2 248.281 8.19856   2 
   1  13  -2 250.222 8.10088   3 
   1  13  -2 244.618 9.82739   2 
   1 -13   2 113.857 6.65274   2 
  -1 -13  -2 130.007 6.53728   3 
   1 -13   2 121.511 3.91325   4 
   1 -13   2 116.801 5.66409   3 
  -1 -13  -2 128.991 5.81448   2 
   1  13   2 129.071 6.12128   3 
  -1  13  -2 127.949 5.37569   3 
   1  13   2 122.067 5.89139   2 
  -1  13  -2 121.498 6.97238   2 
   1  13   2 119.498 4.23395   4 
   3 -13   2 112.227 3.44012   4 
   3 -13   2 107.971 6.44291   2 
  -3 -13  -2 115.246 6.39918   3 
  -3 -13  -2 101.425 5.88072   2 
  -3 -13  -2 119.263 5.22912   4 
   3 -13   2 107.483 5.44854   3 
   3  13   2 111.810 5.75165   3 
   3  13   2 113.178 4.24179   4 
   3  13   2 115.883 5.99385   2 
  -3  13  -2 99.1059 4.97173   3 
  -3  13  -2 122.004 7.00265   2 
  -5 -13  -2 78.1965 4.53654   4 
   5 -13   2 72.3899 5.67168   2 
  -5 -13  -2 74.5411 5.83962   3 
   5 -13   2 70.0731 2.39924   4 
   5 -13   2 69.0163 3.25189   4 
  -5 -13  -2 68.2214 5.62917   2 
   5  13   2 75.8342 3.56536   4 
   5  13   2 76.7304 5.72633   2 
  -5  13  -2 69.5996 6.21314   2 
   5  13   2 80.9599 5.24588   3 
  -5  13  -2 72.7517 4.62915   3 
  -7 -13  -2 93.0313 6.56730   3 
  -7 -13  -2 90.0210 5.09406   4 
  -7 -13  -2 91.8148 6.75432   2 
   7  13   2 95.8553 5.89163   3 
   7  13   2 89.5891 6.67465   2 
   7  13   2 95.0914 4.17347   4 
  -7  13  -2 96.9603 7.35777   2 
  -7  13  -2 87.2975 5.90818   3 
  -7  13  -2 98.7292 5.40736   3 
  -9 -13  -2 119.602 6.12683   4 
  -9 -13  -2 121.867 7.56790   3 
  -9 -13  -2 112.056 8.21432   2 
  -9  13  -2 124.780 8.67002   2 
   9  13   2 119.870 8.51970   2 
   9  13   2 127.651 4.96260   4 
  -9  13  -2 103.418 6.39388   3 
   9  13   2 115.048 6.80927   3 
  -9  13  -2 111.418 6.72278   3 
 -11 -13  -2 5.56328 2.38709   4 
 -11 -13  -2 5.91595 3.57622   3 
 -11 -13  -2 2.83070 4.15545   2 
  11  13   2 9.26548 2.11621   4 
 -11  13  -2 2.98365 3.12122   3 
 -11  13  -2 6.27782 4.87000   2 
 -11  13  -2 2.57525 3.88524   2 
  11  13   2 8.01553 4.35002   2 
 -11  13  -2 4.05333 3.43563   3 
  11  13   2 7.67476 3.18967   3 
 -13 -13  -2 140.267 11.0196   2 
 -13 -13  -2 123.123 9.30534   3 
 -13 -13  -2 134.239 8.73489   4 
 -13  13  -2 148.025 9.59129   2 
  13  13   2 135.755 10.5082   2 
  13  13   2 130.432 8.79221   3 
 -13  13  -2 123.133 8.28419   3 
 -13  13  -2 138.903 8.73721   3 
  13  13   2 140.369 5.98694   4 
 -13  13  -2 125.296 10.7927   2 
 -15 -13  -2 1.16799 5.28808   3 
 -15 -13  -2 -5.2602 3.77976   4 
 -15 -13  -2 -7.4177 5.54694   2 
  15  13   2 5.69657 4.09107   3 
  15  13   2 2.79617 2.19260   4 
 -15  13  -2 -0.8387 4.63801   3 
  15  13   2 12.9260 6.50323   2 
 -15  13  -2 0.84859 5.14813   2 
 -15  13  -2 -2.0982 6.35863   2 
 -17 -13  -2 4.45031 4.47226   4 
 -17 -13  -2 -4.5999 7.38343   2 
 -17 -13  -2 -7.3130 6.10566   3 
 -17  13  -2 8.44951 6.49857   2 
  17  13   2 7.05337 5.26733   3 
 -17  13  -2 5.32053 5.62687   3 
  17  13   2 -0.3966 2.83516   4 
 -17  13  -2 -7.8304 8.14453   2 
  17  13   2 -0.7932 7.89065   2 
 -19 -13  -2 4.11728 6.01480   4 
 -19 -13  -2 -1.6366 9.11848   2 
 -19  13  -2 3.69839 7.05962   3 
  19  13   2 1.59583 6.11453   3 
  19  13   2 7.04375 3.56807   4 
 -19  13  -2 2.81853 8.51456   2 
 -19  13  -2 8.42114 10.6873   2 
 -20 -14   2 17.9174 5.49974   4 
 -20 -14   2 2.16483 9.85151   2 
  20  14  -2 6.29739 7.00973   3 
 -20  14   2 21.4893 11.3772   2 
 -20  14   2 6.24724 8.06493   2 
 -18 -14   2 72.1380 10.8239   2 
 -18 -14   2 91.0532 7.64293   4 
 -18  14   2 89.7489 10.3949   2 
  18  14  -2 67.9474 8.41822   3 
 -18  14   2 115.972 10.7945   3 
 -18  14   2 87.2924 10.2879   2 
 -18  14   2 76.7032 9.46030   3 
 -16 -14   2 118.979 11.8357   2 
 -16 -14   2 78.3806 8.64256   3 
 -16  14   2 102.784 11.9826   2 
  16  14  -2 110.987 9.75047   3 
 -16  14   2 90.7716 9.46724   2 
  16  14  -2 78.2309 10.7001   2 
 -16  14   2 87.0456 9.50097   3 
 -16  14   2 95.9989 9.43714   3 
 -14 -14   2 154.495 10.3474   3 
 -14 -14   2 182.659 12.8041   2 
 -14 -14   2 180.345 7.84861   4 
  14  14  -2 185.322 10.1001   3 
 -14  14   2 161.051 11.1976   3 
 -14  14   2 185.138 10.1402   2 
 -14  14   2 167.180 11.1389   2 
  14  14  -2 150.747 12.6187   2 
 -14  14   2 190.012 11.6048   3 
 -12 -14   2 -1.0332 3.79762   3 
 -12 -14   2 -2.2660 2.12545   4 
 -12 -14   2 -9.3502 4.61020   2 
 -12  14   2 -7.1954 4.33054   3 
 -12  14   2 4.90078 3.43887   2 
  12  14  -2 -0.8214 3.00763   3 
 -12  14   2 3.39509 4.18652   2 
  12  14  -2 2.33758 5.47166   2 
 -12  14   2 -8.8582 3.42364   3 
 -10 -14   2 53.7520 5.87852   3 
 -10 -14   2 58.2704 7.08912   2 
 -10 -14   2 44.5060 3.94951   4 
 -10  14   2 55.9963 5.35142   2 
 -10  14   2 54.6245 6.25548   3 
  10  14  -2 51.6267 5.40129   3 
 -10  14   2 58.8775 6.06726   3 
  10  14  -2 63.0462 7.58966   2 
 -10  14   2 54.7616 5.28033   2 
  -8 -14   2 176.257 6.27225   4 
  -8 -14   2 187.694 10.3879   2 
  -8 -14   2 161.162 8.25311   3 
  -8  14   2 174.047 8.51409   3 
   8  14  -2 184.094 7.94454   3 
  -8  14   2 174.699 4.50481   4 
  -8  14   2 175.565 7.15863   2 
  -8  14   2 167.281 7.82919   2 
   8  14  -2 178.498 10.2854   2 
  -6 -14   2 31.9695 4.87197   2 
  -6 -14   2 32.3939 2.95111   4 
   6 -14  -2 28.4973 3.07567   4 
  -6 -14   2 33.0405 3.99564   3 
  -6  14   2 34.0386 1.90912   4 
  -6  14   2 27.5784 3.95687   3 
   6  14  -2 35.9581 4.11196   3 
   6  14  -2 32.4932 5.36261   2 
  -6  14   2 33.9354 3.77748   2 
   4 -14  -2 48.7959 5.40805   3 
  -4 -14   2 48.9476 4.84380   3 
   4 -14  -2 40.9257 3.49082   4 
  -4 -14   2 48.2170 5.46348   2 
  -4 -14   2 47.9188 3.03410   4 
   4 -14  -2 42.3647 3.79373   2 
  -4  14   2 46.3568 4.95855   3 
   4  14  -2 51.9782 6.05863   2 
  -4  14   2 44.2684 2.32576   4 
  -4  14   2 49.6214 4.54010   2 
   4  14  -2 51.1197 4.06906   3 
  -2 -14   2 87.6103 5.31579   3 
   2 -14  -2 87.1227 4.84633   2 
   2 -14  -2 91.5896 6.20982   3 
   2 -14  -2 80.0540 4.37789   4 
  -2 -14   2 70.4868 6.11248   2 
  -2  14   2 81.8677 5.01550   2 
   2  14  -2 85.7669 6.63686   2 
  -2  14   2 83.1753 3.29131   4 
  -2  14   2 79.7202 5.41789   3 
   2  14  -2 88.6093 4.84119   3 
   0 -14  -2 531.362 14.2291   2 
   0 -14  -2 507.048 13.6431   4 
   0 -14   2 512.668 14.3823   3 
   0 -14   2 449.842 12.9415   4 
   0 -14   2 493.723 15.5567   2 
   0 -14  -2 528.252 15.3736   3 
   0  14   2 505.424 14.2994   2 
   0  14   2 507.236 12.5584   4 
   0  14  -2 523.171 16.0056   2 
   0  14   2 524.334 14.9977   3 
   0  14  -2 517.388 14.0129   3 
   2 -14   2 9.25020 3.18588   2 
   2 -14   2 12.6029 2.80981   3 
   2 -14   2 7.44966 1.23676   4 
  -2 -14  -2 4.38330 3.73118   3 
  -2 -14  -2 10.2210 2.58038   2 
  -2 -14  -2 7.30147 2.40971   4 
  -2  14  -2 6.79667 3.14565   2 
   2  14   2 6.91286 1.46523   4 
  -2  14  -2 6.82892 2.11455   3 
   2  14   2 9.12651 2.62238   2 
   2  14   2 8.98406 2.81032   3 
  -4 -14  -2 510.145 15.4337   3 
   4 -14   2 505.158 11.8682   4 
  -4 -14  -2 493.258 15.1002   2 
   4 -14   2 514.534 15.5025   2 
  -4 -14  -2 499.477 13.9015   4 
   4  14   2 486.558 14.9622   2 
   4  14   2 503.081 14.9576   3 
  -4  14  -2 512.568 16.1450   2 
  -4  14  -2 502.561 14.0693   3 
   6 -14   2 46.0697 1.90647   4 
   6 -14   2 44.2833 2.62196   4 
  -6 -14  -2 47.4008 5.04172   2 
  -6 -14  -2 45.1388 5.17442   3 
   6 -14   2 49.5697 5.58319   2 
  -6 -14  -2 45.7013 4.27178   4 
  -6  14  -2 42.6943 5.45104   2 
   6  14   2 49.8179 3.14738   4 
   6  14   2 45.8861 5.12446   2 
   6  14   2 56.8459 4.98537   3 
  -6  14  -2 35.1500 4.17455   3 
  -8 -14  -2 275.816 9.46748   4 
  -8 -14  -2 263.668 11.5098   2 
  -8 -14  -2 273.107 11.0855   3 
  -8  14  -2 267.578 9.79094   3 
  -8  14  -2 292.188 10.3716   3 
   8  14   2 271.987 8.23098   4 
  -8  14  -2 274.315 11.9790   2 
   8  14   2 271.709 10.4050   3 
 -10 -14  -2 60.4864 6.97113   3 
 -10 -14  -2 52.5895 5.22310   4 
 -10 -14  -2 49.9919 6.68218   2 
  10  14   2 53.0380 6.25454   2 
 -10  14  -2 47.1509 5.60509   3 
 -10  14  -2 63.9505 7.05319   2 
  10  14   2 52.6603 3.72057   4 
  10  14   2 54.7966 5.37768   3 
 -10  14  -2 54.6713 6.22283   3 
 -12 -14  -2 77.8276 9.07131   2 
 -12 -14  -2 67.7960 7.91675   3 
 -12 -14  -2 70.7979 6.29459   4 
  12  14   2 73.0278 7.03154   3 
  12  14   2 66.3531 4.45320   4 
 -12  14  -2 70.4826 8.10276   2 
 -12  14  -2 72.2556 7.11184   3 
 -12  14  -2 69.8448 7.36034   3 
  12  14   2 73.3662 8.04468   2 
 -12  14  -2 68.4071 8.18908   2 
 -14 -14  -2 12.9432 6.45832   2 
 -14 -14  -2 3.26004 5.08479   3 
 -14 -14  -2 14.5042 3.79562   4 
 -14  14  -2 20.2239 7.18999   2 
 -14  14  -2 21.3974 5.15889   3 
  14  14   2 12.3341 2.51559   4 
 -14  14  -2 14.0471 4.83673   3 
  14  14   2 15.4776 6.20308   2 
  14  14   2 9.99495 4.35547   3 
 -14  14  -2 12.1938 5.41332   2 
 -16 -14  -2 101.948 8.65989   4 
 -16 -14  -2 64.4912 8.68681   3 
 -16 -14  -2 94.7855 10.3607   2 
 -16  14  -2 75.3304 10.2986   2 
 -16  14  -2 98.4775 10.9533   2 
  16  14   2 95.9988 9.92970   3 
 -16  14  -2 83.1600 9.90313   3 
  16  14   2 89.7336 5.85653   4 
 -16  14  -2 92.5455 8.58279   3 
  16  14   2 90.5864 10.5499   2 
 -18 -14  -2 23.5564 6.41221   4 
 -18 -14  -2 14.8073 8.80356   2 
 -18  14  -2 34.8111 10.4767   2 
  18  14   2 15.5526 6.21721   3 
 -18  14  -2 12.4069 7.97894   2 
  18  14   2 26.4349 4.02526   4 
 -18  14  -2 14.0838 6.90051   3 
 -19 -15   2 67.8061 12.1323   2 
 -19 -15   2 96.0559 9.48611   4 
  19  15  -2 70.5640 9.31598   3 
 -19  15   2 100.452 12.4421   2 
 -19  15   2 93.2932 10.9850   3 
 -19  15   2 85.8661 10.1658   2 
 -17 -15   2 68.0408 6.96414   4 
 -17 -15   2 68.2588 10.2318   2 
 -17  15   2 62.8461 9.50639   2 
 -17  15   2 62.0337 8.95182   3 
 -17  15   2 67.6542 9.22005   3 
  17  15  -2 45.3340 7.08369   3 
 -17  15   2 67.2530 7.93744   2 
 -15 -15   2 222.469 9.24849   4 
 -15 -15   2 242.536 15.3400   2 
 -15 -15   2 228.605 13.0318   3 
 -15  15   2 213.453 13.4625   2 
  15  15  -2 246.206 12.1163   3 
  15  15  -2 224.570 15.8954   2 
 -15  15   2 202.720 13.0832   3 
 -15  15   2 218.388 11.9970   2 
 -15  15   2 230.957 13.3338   3 
 -13 -15   2 42.0869 5.02154   4 
 -13 -15   2 49.1055 10.9850   2 
 -13 -15   2 37.5418 6.53840   3 
 -13  15   2 43.3203 6.48936   3 
  13  15  -2 48.2105 7.65921   2 
 -13  15   2 42.1597 6.33476   2 
 -13  15   2 37.8462 5.49949   2 
 -13  15   2 43.3466 6.59617   3 
 -11 -15   2 198.457 10.1906   3 
 -11 -15   2 213.900 12.3367   2 
 -11 -15   2 207.660 7.57853   4 
 -11  15   2 203.513 10.0602   2 
  11  15  -2 197.877 12.6793   2 
  11  15  -2 198.071 9.55686   3 
 -11  15   2 185.262 10.4856   3 
 -11  15   2 191.011 8.78120   2 
 -11  15   2 216.600 11.6254   3 
  -9 -15   2 3.45522 1.81129   4 
  -9 -15   2 -3.4710 4.13620   2 
  -9 -15   2 8.26325 3.58351   3 
  -9  15   2 4.07826 3.44761   3 
  -9  15   2 2.76286 2.71903   2 
   9  15  -2 -0.0432 2.64584   3 
  -9  15   2 -1.0521 3.23531   2 
   9  15  -2 -3.2503 3.88677   2 
  -7 -15   2 239.875 7.59091   4 
  -7 -15   2 238.279 9.83989   3 
   7 -15  -2 239.989 7.10931   4 
  -7 -15   2 253.801 11.7044   2 
   7  15  -2 231.392 11.6122   2 
  -7  15   2 235.402 6.05212   4 
   7  15  -2 244.095 9.29912   3 
  -7  15   2 249.491 10.2113   3 
  -7  15   2 219.964 9.08812   2 
  -5 -15   2 94.9658 7.58523   2 
  -5 -15   2 87.5924 4.10672   4 
   5 -15  -2 88.5841 4.53008   4 
  -5 -15   2 92.6466 6.43339   3 
  -5  15   2 82.3904 6.15458   3 
  -5  15   2 81.7418 5.71810   2 
  -5  15   2 88.6762 3.16008   4 
   5  15  -2 87.8127 7.69166   2 
   5  15  -2 83.5891 5.34779   3 
  -3 -15   2 443.721 13.3105   3 
   3 -15  -2 409.662 13.8046   3 
   3 -15  -2 429.866 11.8673   4 
   3 -15  -2 430.018 12.2506   2 
  -3 -15   2 420.682 14.4975   2 
  -3  15   2 431.096 13.5986   3 
   3  15  -2 418.141 12.5278   3 
  -3  15   2 407.671 12.4684   2 
  -3  15   2 427.439 10.5467   4 
   3  15  -2 424.348 14.8292   2 
   1 -15  -2 11.9298 2.76608   2 
  -1 -15   2 7.18032 2.67711   3 
  -1 -15   2 6.86510 1.53550   4 
   1 -15  -2 7.15996 3.19736   3 
  -1 -15   2 11.6303 3.46468   2 
   1 -15  -2 5.81839 2.46677   4 
  -1  15   2 8.72846 1.46477   4 
  -1  15   2 9.99983 3.03975   3 
   1  15  -2 7.11791 3.49272   2 
  -1  15   2 3.59627 2.60638   2 
   1  15  -2 12.5547 2.57127   3 
  -1 -15  -2 537.639 16.3214   3 
   1 -15   2 535.752 15.1991   3 
   1 -15   2 538.082 13.0560   4 
   1 -15   2 539.582 16.5911   2 
  -1 -15  -2 535.297 15.2555   2 
   1  15   2 525.493 15.7488   3 
   1  15   2 529.471 13.3196   4 
   1  15   2 542.100 15.3980   2 
  -1  15  -2 525.607 14.7526   3 
  -1  15  -2 539.231 16.8977   2 
  -3 -15  -2 212.759 7.79644   4 
  -3 -15  -2 207.186 8.79806   2 
   3 -15   2 226.273 9.57286   2 
   3 -15   2 211.829 5.92991   4 
  -3 -15  -2 225.003 9.43983   3 
   3 -15   2 225.222 8.39809   3 
  -3  15  -2 211.056 9.95825   2 
   3  15   2 219.319 8.76270   2 
   3  15   2 210.010 8.73319   3 
  -3  15  -2 212.514 7.88670   3 
   3  15   2 213.637 6.59922   4 
   5 -15   2 17.0862 1.69446   4 
   5 -15   2 19.4493 3.67890   2 
  -5 -15  -2 14.1500 2.60671   4 
  -5 -15  -2 13.8189 3.38337   3 
  -5 -15  -2 21.2009 3.98561   2 
   5  15   2 21.3298 3.89592   2 
  -5  15  -2 16.9894 2.96969   3 
   5  15   2 18.8130 2.09316   4 
   5  15   2 18.5229 3.31931   3 
  -5  15  -2 17.7317 4.53209   2 
  -7 -15  -2 138.270 6.56389   4 
  -7 -15  -2 126.816 8.07473   3 
  -7 -15  -2 120.618 8.31185   2 
   7  15   2 133.658 8.30529   2 
   7  15   2 142.861 7.44831   3 
   7  15   2 136.058 5.22291   4 
  -7  15  -2 137.199 9.18482   2 
  -7  15  -2 129.233 6.78961   3 
  -9 -15  -2 356.660 14.0943   2 
  -9 -15  -2 346.101 11.5483   4 
  -9 -15  -2 349.300 13.2794   3 
   9  15   2 356.175 12.6696   3 
  -9  15  -2 331.311 14.1885   2 
  -9  15  -2 343.281 12.3470   3 
  -9  15  -2 335.517 11.8686   3 
   9  15   2 375.593 14.0799   2 
   9  15   2 354.986 10.1814   4 
 -11 -15  -2 259.468 11.9494   3 
 -11 -15  -2 263.360 10.0511   4 
 -11 -15  -2 242.871 12.6919   2 
  11  15   2 244.255 11.0603   3 
  11  15   2 260.693 8.42982   4 
  11  15   2 241.543 12.6117   2 
 -11  15  -2 264.962 10.8449   3 
 -11  15  -2 260.789 11.0079   3 
 -11  15  -2 237.732 12.9619   2 
 -13 -15  -2 7.87307 4.54451   4 
 -13 -15  -2 3.81957 5.49815   2 
 -13 -15  -2 -0.3954 4.84116   3 
  13  15   2 19.0405 5.77918   2 
 -13  15  -2 3.59306 4.47619   3 
  13  15   2 4.98492 2.20971   4 
 -13  15  -2 4.44500 4.92095   2 
 -13  15  -2 9.49465 4.21528   3 
  13  15   2 5.30153 3.92492   3 
 -13  15  -2 1.06703 6.22140   2 
 -15 -15  -2 69.1685 8.13379   4 
 -15 -15  -2 73.4421 9.39178   2 
 -15 -15  -2 64.3411 8.55955   3 
  15  15   2 83.4082 9.09021   3 
 -15  15  -2 68.8348 7.53390   3 
  15  15   2 65.7589 9.00605   2 
 -15  15  -2 77.0314 9.94680   2 
 -15  15  -2 67.8416 7.49358   3 
 -15  15  -2 61.3244 8.29061   2 
  15  15   2 70.2243 5.51789   4 
 -17 -15  -2 19.6408 8.63961   2 
 -17 -15  -2 23.1548 6.25579   4 
 -17  15  -2 20.0463 6.72569   3 
  17  15   2 16.0005 3.91509   4 
 -17  15  -2 7.94398 7.59266   3 
 -17  15  -2 30.6423 10.3079   2 
  17  15   2 24.4964 8.96133   2 
 -17  15  -2 14.2922 7.49876   2 
  17  15   2 18.5622 6.36986   3 
 -19 -15  -2 24.5003 10.4207   2 
 -19 -15  -2 17.3871 7.06193   4 
  19  15   2 23.1027 7.25549   3 
 -19  15  -2 29.9392 9.21229   2 
  19  15   2 22.2600 4.49069   4 
 -19  15  -2 23.5883 8.34453   3 
 -19  15  -2 16.5455 8.11470   3 
 -18 -16   2 0.87591 9.22950   2 
 -18 -16   2 0.44229 4.83614   4 
 -18  16   2 -3.1993 9.31277   2 
  18  16  -2 -5.2690 5.96326   3 
 -18  16   2 -0.7210 6.65467   2 
 -18  16   2 -12.996 7.28688   3 
 -16 -16   2 6.10999 7.98466   2 
 -16 -16   2 27.5078 4.42946   4 
 -16 -16   2 2.25928 6.17301   3 
 -16  16   2 16.8600 7.77999   2 
 -16  16   2 20.3634 7.15242   3 
  16  16  -2 24.7047 9.27802   2 
 -16  16   2 18.3834 6.04793   2 
  16  16  -2 16.3946 5.58308   3 
 -16  16   2 17.1667 7.97496   3 
 -14 -16   2 5.95816 2.66724   4 
 -14 -16   2 13.7973 6.04953   3 
 -14 -16   2 -5.7617 6.27030   2 
  14  16  -2 5.55943 6.87853   2 
 -14  16   2 1.35669 4.75005   2 
 -14  16   2 7.26925 6.16403   3 
 -14  16   2 2.50854 5.33565   3 
 -14  16   2 11.6871 5.86284   2 
  14  16  -2 9.70968 4.60562   3 
 -12 -16   2 16.3005 7.77539   2 
 -12 -16   2 11.6411 2.95749   4 
 -12 -16   2 12.9488 5.00402   3 
 -12  16   2 4.65552 5.26963   3 
 -12  16   2 9.12331 4.59615   3 
  12  16  -2 13.2615 4.39820   3 
  12  16  -2 29.4136 7.02935   2 
 -12  16   2 8.19242 3.83925   2 
 -10 -16   2 5.85194 2.39735   4 
 -10 -16   2 3.87713 3.93816   3 
 -10 -16   2 5.34074 4.81006   2 
 -10  16   2 3.94335 3.79888   2 
 -10  16   2 1.89156 4.15409   3 
  10  16  -2 6.39542 3.32363   3 
 -10  16   2 8.65038 3.21745   2 
 -10  16   2 8.27485 4.72058   3 
  10  16  -2 4.00019 5.17386   2 
  -8 -16   2 -2.1903 1.59471   4 
  -8 -16   2 2.32121 4.18459   2 
  -8 -16   2 2.51227 3.44455   3 
   8  16  -2 -2.4043 4.38550   2 
  -8  16   2 0.55358 3.30364   2 
  -8  16   2 2.03068 3.21250   3 
  -8  16   2 0.73695 0.79868   4 
   8  16  -2 -2.6613 2.53917   3 
  -6 -16   2 81.7087 4.24540   4 
  -6 -16   2 85.0290 6.80720   3 
  -6 -16   2 76.9378 7.74566   2 
   6 -16  -2 69.4944 4.18760   4 
  -6  16   2 73.8534 6.49634   3 
   6  16  -2 71.9367 5.54993   3 
  -6  16   2 69.9343 2.79243   4 
  -6  16   2 68.9264 6.15874   2 
   6  16  -2 75.7999 8.59064   2 
   4 -16  -2 5.53458 3.53671   3 
   4 -16  -2 -0.6994 1.99327   4 
   4 -16  -2 -2.1536 2.15536   2 
  -4 -16   2 1.70354 1.52900   4 
  -4 -16   2 0.55487 3.59691   2 
  -4  16   2 -0.4926 2.56499   3 
   4  16  -2 0.59784 2.30677   3 
   4  16  -2 5.55539 3.99383   2 
  -4  16   2 1.52985 2.79823   2 
  -4  16   2 -0.7459 1.00830   4 
   2 -16  -2 30.2912 4.52024   3 
   2 -16  -2 35.3967 3.91685   4 
  -2 -16   2 44.1596 4.48249   3 
  -2 -16   2 43.9731 5.48357   2 
   2 -16  -2 38.2473 4.54370   2 
  -2 -16   2 32.3608 2.77968   4 
  -2  16   2 40.6208 4.50195   3 
  -2  16   2 35.1065 2.55929   4 
  -2  16   2 41.8093 4.84949   2 
   2  16  -2 42.3720 4.35153   3 
   0 -16  -2 -0.9614 2.03138   4 
   0 -16   2 2.07615 2.71267   3 
   0 -16  -2 7.18903 3.50026   3 
   0 -16   2 4.77138 3.53524   2 
   0 -16   2 1.67070 1.35040   4 
   0 -16  -2 -0.6530 2.55436   2 
   0  16  -2 1.76905 3.72274   2 
   0  16   2 2.52980 2.61540   3 
   0  16   2 2.88600 1.27801   4 
   0  16  -2 4.64287 2.27489   3 
   0  16   2 0.43723 2.52764   2 
  -2 -16  -2 264.029 10.5532   3 
  -2 -16  -2 253.408 9.82750   2 
   2 -16   2 249.601 6.96235   4 
   2 -16   2 267.235 10.7085   2 
   2 -16   2 251.751 9.50871   3 
  -2  16  -2 242.857 11.0768   2 
   2  16   2 248.613 9.80380   3 
  -2  16  -2 254.653 8.93848   3 
   2  16   2 252.995 9.64208   2 
   2  16   2 237.328 7.31816   4 
  -4 -16  -2 0.78968 3.27913   3 
  -4 -16  -2 4.37493 2.32158   4 
   4 -16   2 2.89523 1.15378   4 
  -4 -16  -2 3.40753 3.34192   2 
   4 -16   2 1.77057 3.06985   2 
   4  16   2 5.42848 3.19729   2 
   4  16   2 2.26237 2.71679   3 
  -4  16  -2 7.64056 2.64814   3 
   4  16   2 2.58668 1.58475   4 
   6 -16   2 1.51154 1.11643   4 
  -6 -16  -2 0.85248 3.59284   2 
   6 -16   2 3.67866 3.44058   2 
  -6 -16  -2 0.56566 2.48887   4 
   6 -16   2 1.82687 1.55769   4 
  -6 -16  -2 6.22974 3.59455   3 
   6  16   2 2.78849 2.95577   3 
  -6  16  -2 1.50133 2.58969   3 
  -6  16  -2 5.31553 4.38910   2 
   6  16   2 5.94104 3.49189   2 
   6  16   2 5.70940 1.66635   4 
  -8 -16  -2 74.4941 7.75396   3 
  -8 -16  -2 84.2104 5.95281   4 
  -8 -16  -2 76.9511 8.19866   2 
  -8  16  -2 78.8981 8.80648   2 
   8  16   2 77.0248 8.00203   2 
   8  16   2 87.2341 6.79327   3 
  -8  16  -2 72.3416 6.19280   3 
   8  16   2 84.3062 4.41283   4 
  -8  16  -2 84.8794 7.09530   3 
 -10 -16  -2 58.0369 7.03717   3 
 -10 -16  -2 66.2285 6.13594   4 
 -10 -16  -2 59.6974 7.59240   2 
 -10  16  -2 66.3493 7.37504   3 
  10  16   2 61.2572 4.28764   4 
  10  16   2 71.1346 7.00717   3 
 -10  16  -2 66.6123 7.76332   2 
  10  16   2 65.1456 7.65724   2 
 -10  16  -2 74.1070 6.76775   3 
 -12 -16  -2 18.3311 4.48111   4 
 -12 -16  -2 21.9977 6.06113   2 
 -12 -16  -2 13.7912 5.53138   3 
  12  16   2 16.7912 2.78052   4 
  12  16   2 14.2262 4.43798   3 
 -12  16  -2 17.4009 6.54977   2 
 -12  16  -2 20.1447 4.96480   2 
 -12  16  -2 20.1160 4.95007   3 
 -12  16  -2 17.6869 4.44515   3 
  12  16   2 15.1906 5.42729   2 
 -14 -16  -2 35.0725 7.44440   3 
 -14 -16  -2 33.9823 5.50373   4 
 -14 -16  -2 33.1491 7.58550   2 
 -14  16  -2 16.8131 8.25382   2 
  14  16   2 25.8450 5.62548   3 
 -14  16  -2 44.1966 6.36977   3 
 -14  16  -2 22.3565 10.7655   2 
 -14  16  -2 34.8681 6.01257   3 
  14  16   2 34.5833 3.79334   4 
  14  16   2 30.0155 7.49840   2 
 -16 -16  -2 -3.9218 5.14620   4 
 -16 -16  -2 -4.5995 7.61662   2 
 -16  16  -2 -14.328 8.77380   2 
 -16  16  -2 -7.2606 6.29436   2 
  16  16   2 2.70204 2.87616   4 
 -16  16  -2 3.68080 6.36167   3 
 -16  16  -2 3.58024 5.82137   3 
  16  16   2 -9.1634 7.55967   2 
  16  16   2 -10.166 4.84326   3 
 -18 -16  -2 -4.1343 6.30820   4 
 -18 -16  -2 -12.365 9.01423   2 
 -18  16  -2 -1.7278 7.76869   2 
 -18  16  -2 2.34378 7.40043   3 
  18  16   2 3.87468 3.85172   4 
 -18  16  -2 22.6099 16.9150   2 
  18  16   2 2.01756 6.35834   3 
 -18  16  -2 -6.0235 7.26564   3 
 -17 -17   2 89.0678 8.48968   4 
 -17 -17   2 82.0130 11.4980   2 
 -17  17   2 92.8452 10.9928   2 
 -17  17   2 78.1301 10.0219   3 
 -17  17   2 65.3348 9.95133   3 
  17  17  -2 79.8789 8.92701   3 
 -17  17   2 76.4183 9.17497   2 
 -15 -17   2 51.9358 5.63059   4 
 -15 -17   2 31.0129 9.05732   2 
 -15 -17   2 47.1115 8.46103   3 
  15  17  -2 26.6435 8.59489   2 
 -15  17   2 43.5026 7.51022   3 
  15  17  -2 43.4616 6.69673   3 
 -15  17   2 44.0261 8.23874   2 
 -15  17   2 45.7471 7.04265   2 
 -15  17   2 30.1923 7.83964   3 
 -13 -17   2 236.913 9.36534   4 
 -13 -17   2 226.613 12.9764   3 
 -13 -17   2 230.416 15.1125   2 
  13  17  -2 241.346 15.9407   2 
 -13  17   2 210.102 13.4831   3 
 -13  17   2 245.249 11.5746   2 
  13  17  -2 249.000 11.7831   3 
 -13  17   2 241.510 13.2941   3 
 -13  17   2 247.185 12.9774   2 
 -11 -17   2 34.6084 7.02996   2 
 -11 -17   2 32.2702 6.00535   3 
 -11 -17   2 29.0843 3.49072   4 
 -11  17   2 29.4033 5.45614   2 
 -11  17   2 36.1844 6.92978   3 
 -11  17   2 28.8079 5.26758   3 
  11  17  -2 25.3942 7.14322   2 
 -11  17   2 32.6911 4.83996   2 
  11  17  -2 36.2744 5.10946   3 
  -9 -17   2 75.0946 8.25682   2 
  -9 -17   2 75.5561 4.98920   4 
  -9 -17   2 79.9436 7.92493   3 
  -9  17   2 78.2536 7.60389   3 
   9  17  -2 80.7790 9.68932   2 
  -9  17   2 80.5057 2.58453   4 
  -9  17   2 69.0543 7.49793   2 
  -9  17   2 64.3245 6.00649   2 
  -7 -17   2 7.01314 4.64663   2 
  -7 -17   2 10.5543 4.12916   3 
   7 -17  -2 4.87378 2.09866   4 
  -7 -17   2 5.82361 2.07032   4 
   7  17  -2 3.41908 2.98515   3 
  -7  17   2 2.16798 3.56797   2 
  -7  17   2 6.00948 1.14377   4 
  -7  17   2 0.43521 3.37281   3 
   7  17  -2 9.19644 5.09242   2 
  -5 -17   2 344.461 10.0273   4 
   5 -17  -2 342.608 10.3430   4 
  -5 -17   2 348.356 14.0740   2 
  -5 -17   2 334.501 12.5819   3 
  -5  17   2 353.782 11.7923   2 
   5  17  -2 358.500 11.9163   3 
  -5  17   2 347.541 8.83443   4 
  -5  17   2 347.018 12.7054   3 
   5  17  -2 365.473 14.4242   2 
   3 -17  -2 42.8929 5.62288   3 
   3 -17  -2 38.8103 4.04185   2 
  -3 -17   2 43.4985 5.12237   3 
   3 -17  -2 39.9394 4.24425   4 
  -3 -17   2 40.0019 5.74610   2 
  -3  17   2 44.9687 2.68090   4 
   3  17  -2 38.9137 5.98683   2 
   3  17  -2 41.8204 4.41997   3 
  -3  17   2 46.5287 5.13927   3 
  -3  17   2 39.9890 4.35064   2 
  -1 -17   2 852.343 22.4198   3 
   1 -17  -2 824.315 23.3034   3 
   1 -17  -2 817.851 21.6322   2 
  -1 -17   2 834.158 23.8125   2 
   1 -17  -2 815.898 21.0119   4 
  -1 -17   2 823.994 19.8359   4 
  -1  17   2 793.026 21.7549   2 
   1  17  -2 809.772 24.0029   2 
  -1  17   2 835.445 22.7726   3 
  -1  17   2 802.567 19.4897   4 
   1  17  -2 841.635 21.7479   3 
   1 -17   2 290.797 10.6990   3 
   1 -17   2 279.445 11.6846   2 
  -1 -17  -2 303.706 11.8064   3 
   1 -17   2 282.767 7.98743   4 
  -1 -17  -2 288.675 9.66347   4 
  -1 -17  -2 285.173 10.6023   2 
  -1  17  -2 262.422 12.2957   2 
   1  17   2 290.514 10.9300   3 
   1  17   2 290.684 8.22126   4 
  -1  17  -2 306.274 10.2344   3 
   1  17   2 285.718 10.6704   2 
  -3 -17  -2 207.415 8.08897   4 
   3 -17   2 199.674 9.79672   2 
   3 -17   2 210.295 6.07706   4 
  -3 -17  -2 196.117 9.87472   3 
  -3 -17  -2 207.089 9.28825   2 
   3 -17   2 204.395 8.84729   3 
  -3  17  -2 211.178 10.9353   2 
   3  17   2 198.453 6.58377   4 
   3  17   2 208.357 9.21020   3 
   3  17   2 200.826 9.11619   2 
  -3  17  -2 202.139 8.16684   3 
   5 -17   2 19.6510 2.17168   4 
  -5 -17  -2 11.1840 4.22019   3 
  -5 -17  -2 15.0117 3.26185   4 
  -5 -17  -2 13.6796 4.08341   2 
   5 -17   2 19.2140 4.12585   2 
  -5  17  -2 22.6265 3.52535   3 
   5  17   2 24.1853 4.63584   2 
  -5  17  -2 16.8110 4.88174   2 
   5  17   2 18.1944 3.56299   3 
   5  17   2 16.1001 2.09361   4 
  -7 -17  -2 87.6415 8.71986   2 
  -7 -17  -2 106.864 6.62318   4 
  -7 -17  -2 101.005 8.41095   3 
   7  17   2 101.747 7.26494   3 
  -7  17  -2 106.746 6.85123   3 
   7  17   2 108.911 4.89094   4 
  -7  17  -2 100.359 9.55235   2 
   7  17   2 101.048 8.45675   2 
  -9 -17  -2 244.027 12.1203   3 
  -9 -17  -2 267.769 12.8813   2 
  -9 -17  -2 261.413 10.2183   4 
  -9  17  -2 267.879 11.5401   3 
   9  17   2 271.047 8.55053   4 
   9  17   2 254.513 12.8874   2 
   9  17   2 243.608 10.9650   3 
  -9  17  -2 254.749 10.5696   3 
  -9  17  -2 252.246 13.5279   2 
 -11 -17  -2 55.5812 5.73126   4 
 -11 -17  -2 63.4705 7.76434   3 
 -11 -17  -2 66.7098 8.17465   2 
  11  17   2 54.2187 4.47756   4 
 -11  17  -2 55.9954 6.73616   3 
  11  17   2 60.6386 6.44060   3 
 -11  17  -2 59.2274 7.96503   2 
  11  17   2 58.1885 7.43281   2 
 -11  17  -2 66.5981 7.08325   3 
 -13 -17  -2 86.1200 9.11708   3 
 -13 -17  -2 94.3391 11.2511   2 
 -13 -17  -2 106.670 10.9389   4 
 -13  17  -2 111.826 13.0909   2 
  13  17   2 124.125 9.78534   3 
 -13  17  -2 119.607 10.8683   2 
 -13  17  -2 116.861 9.95498   3 
 -13  17  -2 109.840 9.08700   3 
  13  17   2 105.969 11.8526   2 
  13  17   2 109.311 6.10816   4 
 -15 -17  -2 12.5655 5.68706   4 
 -15 -17  -2 11.1020 8.10906   2 
 -15  17  -2 17.2591 9.17971   2 
 -15  17  -2 18.0988 5.96426   3 
 -15  17  -2 15.1942 6.29096   3 
 -15  17  -2 17.7547 6.74692   2 
  15  17   2 29.4620 8.53222   2 
  15  17   2 13.1067 3.32746   4 
  15  17   2 19.4603 6.00010   3 
 -17 -17  -2 43.8336 7.60024   4 
 -17 -17  -2 29.9279 10.0094   2 
 -17  17  -2 38.7574 7.68023   3 
 -17  17  -2 45.4601 8.65314   2 
  17  17   2 30.8498 7.17863   3 
 -17  17  -2 32.0275 8.29214   3 
 -17  17  -2 22.5748 11.5284   2 
 -18 -18   2 0.41597 5.58517   4 
 -18 -18   2 8.30908 10.1918   2 
 -18  18   2 10.4627 7.50406   2 
  18  18  -2 5.84940 7.13163   3 
 -18  18   2 -2.6424 10.6467   2 
 -18  18   2 -3.9597 8.30626   3 
 -16 -18   2 11.7267 4.83630   4 
 -16 -18   2 20.7712 9.54255   2 
 -16  18   2 18.2151 8.65077   2 
  16  18  -2 16.7641 6.21805   3 
 -16  18   2 27.6336 8.14568   3 
 -16  18   2 35.1058 7.17130   2 
 -16  18   2 22.3854 8.56953   3 
 -14 -18   2 0.84217 6.54957   3 
 -14 -18   2 34.5544 9.00327   2 
 -14 -18   2 9.97175 3.88308   4 
 -14  18   2 1.26434 6.63115   2 
  14  18  -2 12.8949 5.47541   3 
 -14  18   2 4.92776 5.26140   2 
  14  18  -2 -1.3984 7.52668   2 
 -14  18   2 15.4554 6.12303   3 
 -14  18   2 11.6691 7.42158   3 
 -12 -18   2 39.0685 4.48157   4 
 -12 -18   2 37.7161 7.90402   2 
 -12 -18   2 27.9091 6.72662   3 
 -12  18   2 28.2112 5.98189   3 
  12  18  -2 40.3246 5.58984   3 
 -12  18   2 25.5437 6.09139   2 
 -12  18   2 31.3306 5.34511   2 
 -12  18   2 35.7731 7.43556   3 
  12  18  -2 27.6256 8.28828   2 
 -10 -18   2 4.10843 5.03724   3 
 -10 -18   2 3.43647 2.41637   4 
 -10 -18   2 -6.3450 4.98659   2 
 -10  18   2 -1.0674 3.91774   3 
 -10  18   2 6.33720 3.86639   2 
  10  18  -2 0.17863 5.84377   2 
  10  18  -2 -0.2758 3.41318   3 
 -10  18   2 7.53433 4.53620   2 
  -8 -18   2 87.5965 5.13005   4 
  -8 -18   2 90.1973 9.39996   2 
  -8 -18   2 102.651 8.60880   3 
  -8  18   2 83.9611 3.09060   4 
  -8  18   2 95.8689 8.03806   3 
  -8  18   2 94.4241 7.93013   2 
   8  18  -2 83.8701 7.08867   3 
   8  18  -2 92.5695 10.3664   2 
  -6 -18   2 60.5270 6.10202   3 
  -6 -18   2 64.1018 7.39462   2 
   6 -18  -2 58.7820 4.52590   4 
  -6 -18   2 57.9093 4.29720   4 
  -6  18   2 61.9051 2.77509   4 
   6  18  -2 59.9368 7.54881   2 
  -6  18   2 62.8101 6.72399   3 
   6  18  -2 54.9611 5.64831   3 
  -6  18   2 59.0909 6.64417   2 
   4 -18  -2 8.69923 2.67449   4 
  -4 -18   2 20.2171 4.38075   3 
   4 -18  -2 8.92588 4.33883   3 
   4 -18  -2 6.29138 2.90445   2 
  -4 -18   2 8.37187 2.16948   4 
  -4 -18   2 12.1799 4.69671   2 
  -4  18   2 8.94197 3.26045   3 
  -4  18   2 11.6425 3.67561   2 
   4  18  -2 13.2814 3.44792   3 
  -4  18   2 13.2236 1.61266   4 
   4  18  -2 6.12506 4.99746   2 
   2 -18  -2 41.9781 5.54961   3 
  -2 -18   2 32.7103 5.47871   2 
   2 -18  -2 30.3558 3.88204   2 
  -2 -18   2 32.0767 4.67853   3 
   2 -18  -2 31.3126 3.55721   4 
  -2 -18   2 24.7491 2.62161   4 
  -2  18   2 27.3979 2.67841   4 
  -2  18   2 31.7623 4.37941   2 
   2  18  -2 44.9306 5.16150   3 
   2  18  -2 34.5798 5.73780   2 
  -2  18   2 30.4553 4.45077   3 
   0 -18   2 10.9128 4.28154   2 
   0 -18  -2 18.3979 4.63902   3 
   0 -18  -2 10.4119 3.32974   2 
   0 -18   2 13.8221 2.15153   4 
   0 -18   2 15.1325 4.82473   3 
   0  18   2 11.6317 3.67599   2 
   0  18   2 10.8292 3.54596   3 
   0  18  -2 21.2516 5.14796   2 
   0  18  -2 15.5965 3.42074   3 
   0  18   2 12.4373 1.86544   4 
  -2 -18  -2 143.733 9.35264   3 
   2 -18   2 157.894 5.40007   4 
  -2 -18  -2 152.240 8.48954   2 
   2 -18   2 167.162 9.54089   2 
   2  18   2 157.304 8.23344   3 
  -2  18  -2 159.908 7.50360   3 
   2  18   2 153.564 8.30603   2 
  -2  18  -2 163.472 10.2152   2 
   2  18   2 167.980 5.73925   4 
  -4 -18  -2 47.2187 5.11357   4 
   4 -18   2 47.8302 2.96540   4 
  -4 -18  -2 48.8236 5.66665   2 
  -4 -18  -2 45.1133 5.70878   3 
   4 -18   2 48.3289 5.71031   2 
   4  18   2 40.9469 3.47773   4 
   4  18   2 46.1114 5.54875   2 
  -4  18  -2 44.4788 5.21413   3 
  -4  18  -2 48.8479 6.58060   2 
   4  18   2 51.3931 6.02879   3 
   6 -18   2 8.64831 1.60617   4 
  -6 -18  -2 7.55777 4.54092   2 
  -6 -18  -2 2.57234 4.28988   3 
  -6 -18  -2 11.7069 3.45358   4 
   6 -18   2 9.25003 2.01825   4 
   6 -18   2 15.3011 4.42198   2 
  -6  18  -2 7.54016 5.07894   2 
   6  18   2 11.1299 3.85921   3 
  -6  18  -2 6.46468 3.30378   3 
   6  18   2 12.1702 2.21254   4 
   6  18   2 8.41015 4.37181   2 
  -8 -18  -2 -10.537 4.60386   2 
  -8 -18  -2 1.36790 3.13606   4 
  -8 -18  -2 1.80059 4.38495   3 
  -8  18  -2 1.35088 3.56955   3 
  -8  18  -2 5.42970 5.73003   2 
   8  18   2 2.45832 3.94037   3 
   8  18   2 -4.0397 4.25466   2 
   8  18   2 1.29405 1.78749   4 
 -10 -18  -2 80.9918 7.38180   4 
 -10 -18  -2 88.3242 10.1859   2 
 -10 -18  -2 85.1677 8.74668   3 
 -10  18  -2 70.1338 7.31278   3 
 -10  18  -2 114.601 11.6777   2 
  10  18   2 77.2753 4.94792   4 
  10  18   2 86.0865 10.2693   2 
  10  18   2 80.8482 8.19909   3 
 -10  18  -2 97.1139 9.13169   3 
 -12 -18  -2 1.03379 6.40195   2 
 -12 -18  -2 13.4445 6.41222   3 
 -12 -18  -2 7.05069 4.42984   4 
 -12  18  -2 10.7943 4.28936   3 
 -12  18  -2 0.20056 7.21118   2 
  12  18   2 8.46455 2.72896   4 
  12  18   2 3.33143 4.64682   3 
 -12  18  -2 8.02456 5.53612   3 
  12  18   2 7.75491 6.77306   2 
 -14 -18  -2 21.3407 5.55971   4 
 -14 -18  -2 22.5325 7.83233   2 
 -14  18  -2 6.78749 6.53041   2 
 -14  18  -2 3.30459 5.16791   3 
 -14  18  -2 -3.9257 5.62080   3 
  14  18   2 14.0536 5.59639   3 
 -14  18  -2 6.22860 8.95767   2 
  14  18   2 6.85239 7.28039   2 
  14  18   2 11.5329 3.44884   4 
 -16 -18  -2 4.57856 8.98541   2 
 -16 -18  -2 5.22189 6.23140   4 
 -16  18  -2 12.6853 7.25993   2 
  16  18   2 14.0727 3.88110   4 
  16  18   2 7.41800 5.79251   3 
 -16  18  -2 19.9403 6.83681   3 
 -16  18  -2 -4.6530 10.1864   2 
 -16  18  -2 14.6311 7.79481   3 
 -17 -19   2 36.3063 6.32218   4 
 -17 -19   2 34.0851 11.3609   2 
 -17  19   2 14.4076 9.21087   2 
 -17  19   2 47.5819 10.8192   2 
 -17  19   2 40.6525 9.61241   3 
  17  19  -2 24.2461 7.57293   3 
 -15 -19   2 33.7918 10.3446   2 
 -15 -19   2 27.4465 5.02315   4 
 -15  19   2 31.1934 7.01854   2 
 -15  19   2 33.6303 7.70350   3 
 -15  19   2 24.0477 8.58835   3 
  15  19  -2 11.4090 6.29612   3 
 -15  19   2 13.4563 8.46448   2 
 -13 -19   2 27.1602 7.18181   3 
 -13 -19   2 6.91832 7.82162   2 
 -13 -19   2 20.3742 4.15355   4 
  13  19  -2 25.9849 5.97560   3 
  13  19  -2 20.3033 8.92769   2 
 -13  19   2 18.9815 6.22223   3 
 -13  19   2 20.0231 5.58875   2 
 -13  19   2 8.17089 7.33025   3 
 -13  19   2 24.1740 6.78860   2 
 -11 -19   2 150.035 11.7282   3 
 -11 -19   2 145.980 13.0121   2 
 -11 -19   2 144.482 7.48355   4 
  11  19  -2 137.619 14.3074   2 
 -11  19   2 151.806 12.6464   3 
 -11  19   2 136.336 10.8028   2 
  11  19  -2 141.908 9.60743   3 
 -11  19   2 143.782 9.22449   2 
 -11  19   2 147.324 11.0267   3 
  -9 -19   2 10.1685 5.80756   2 
  -9 -19   2 12.3079 2.73764   4 
  -9 -19   2 6.67781 5.10483   3 
  -9  19   2 12.8257 5.27879   2 
   9  19  -2 7.82682 6.55501   2 
   9  19  -2 13.4096 4.14854   3 
  -9  19   2 9.76080 3.69031   2 
  -9  19   2 8.91591 4.46051   3 
  -7 -19   2 29.6695 6.33194   2 
  -7 -19   2 33.1892 5.78616   3 
   7 -19  -2 34.8306 4.16586   4 
  -7 -19   2 39.6039 4.29449   4 
  -7  19   2 32.0055 5.19033   2 
  -7  19   2 35.9245 2.41350   4 
   7  19  -2 41.4599 7.21164   2 
   7  19  -2 31.6955 4.56854   3 
  -7  19   2 38.5204 5.51814   3 
   5 -19  -2 2.47913 2.56927   4 
  -5 -19   2 -6.7368 4.43772   2 
  -5 -19   2 2.05186 4.12277   3 
  -5 -19   2 -2.8174 1.84433   4 
  -5  19   2 -3.3112 3.67707   2 
   5  19  -2 2.27407 2.81271   3 
  -5  19   2 -3.5534 3.25927   3 
   5  19  -2 -6.5821 4.80907   2 
  -5  19   2 0.06300 1.19157   4 
   3 -19  -2 78.9484 5.48524   4 
  -3 -19   2 67.8307 7.65708   3 
   3 -19  -2 88.7585 8.55011   3 
   3 -19  -2 66.9071 6.00598   2 
  -3 -19   2 90.0475 8.66630   2 
  -3  19   2 75.9915 6.79203   2 
  -3  19   2 71.3943 7.01860   3 
   3  19  -2 77.7541 6.21248   3 
  -3  19   2 75.0810 3.46994   4 
   3  19  -2 69.1329 7.47684   2 
  -1 -19   2 74.4284 4.15504   4 
  -1 -19   2 81.3786 8.04433   2 
   1 -19  -2 73.3143 8.19468   3 
  -1 -19   2 71.8771 7.25289   3 
   1 -19  -2 75.3330 6.32849   2 
   1 -19  -2 77.3576 5.47671   4 
   1  19  -2 57.9744 5.78210   3 
  -1  19   2 66.3813 5.99480   2 
   1  19  -2 64.7819 7.29585   2 
  -1  19   2 69.8598 6.72669   3 
  -1  19   2 74.1012 3.69992   4 
   1 -19   2 158.536 8.77012   3 
   1 -19   2 175.916 9.93970   2 
  -1 -19  -2 149.319 9.82304   3 
   1 -19   2 162.991 5.73191   4 
  -1 -19  -2 165.920 7.60281   4 
  -1 -19  -2 146.145 8.47423   2 
  -1  19  -2 178.828 10.8515   2 
   1  19   2 153.538 8.84773   2 
   1  19   2 149.831 8.71713   3 
   1  19   2 152.306 5.63881   4 
  -1  19  -2 165.135 7.94657   3 
   3 -19   2 81.0175 7.36782   3 
   3 -19   2 70.7646 8.01436   2 
  -3 -19  -2 95.0434 7.75657   2 
  -3 -19  -2 84.9026 8.54657   3 
   3 -19   2 79.3750 3.97275   4 
  -3  19  -2 88.6527 8.32104   2 
   3  19   2 85.1499 4.34068   4 
   3  19   2 85.0261 7.04492   3 
   3  19   2 82.0424 7.64106   2 
  -3  19  -2 88.4015 6.41147   3 
   5 -19   2 208.319 6.37427   4 
  -5 -19  -2 194.415 11.0075   3 
  -5 -19  -2 198.137 8.95128   4 
   5 -19   2 206.841 10.6225   2 
  -5 -19  -2 228.458 11.2514   2 
  -5  19  -2 200.752 12.2560   2 
  -5  19  -2 202.643 9.14643   3 
   5  19   2 208.074 10.2137   3 
   5  19   2 210.340 11.0474   2 
   5  19   2 204.994 7.10939   4 
  -7 -19  -2 39.3050 4.81613   4 
  -7 -19  -2 54.4597 6.71031   2 
  -7 -19  -2 31.5906 6.39787   3 
  -7  19  -2 40.6263 5.07343   3 
   7  19   2 34.8437 6.15688   2 
  -7  19  -2 31.4628 6.81670   2 
   7  19   2 42.2224 3.92764   4 
   7  19   2 32.9246 8.18230   3 
  -9 -19  -2 18.9489 4.14294   4 
  -9 -19  -2 26.0412 6.22612   2 
  -9 -19  -2 18.5214 5.95413   3 
   9  19   2 14.2609 6.18989   2 
   9  19   2 18.2764 4.58480   3 
  -9  19  -2 29.8496 7.22247   2 
   9  19   2 18.4342 2.88509   4 
  -9  19  -2 25.1189 4.80411   3 
  -9  19  -2 28.2861 5.75181   3 
 -11 -19  -2 8.31950 6.02427   2 
 -11 -19  -2 13.6871 7.21638   3 
 -11 -19  -2 14.3700 4.27498   4 
 -11  19  -2 9.09023 5.67331   3 
  11  19   2 16.7197 6.94087   2 
 -11  19  -2 12.6533 7.74688   2 
  11  19   2 12.0372 5.06300   3 
 -11  19  -2 9.60562 4.67116   3 
  11  19   2 14.2502 2.86113   4 
 -13 -19  -2 30.0629 8.73526   4 
 -13 -19  -2 45.3188 8.58861   2 
 -13  19  -2 28.6387 6.91770   2 
 -13  19  -2 22.6616 6.59803   3 
  13  19   2 21.1130 8.06269   2 
  13  19   2 30.8815 6.03189   3 
 -13  19  -2 25.2880 9.42752   2 
  13  19   2 22.5256 3.67295   4 
 -13  19  -2 22.2680 5.80531   3 
 -15 -19  -2 48.6723 10.6109   2 
 -15 -19  -2 45.4173 7.37907   4 
  15  19   2 38.8521 4.53359   4 
  15  19   2 24.9035 6.93350   3 
 -15  19  -2 15.7529 10.9241   2 
 -15  19  -2 35.8827 7.13460   3 
 -15  19  -2 39.4889 8.32342   2 
 -15  19  -2 33.3852 8.07513   3 
  15  19   2 36.7996 9.26404   2 
 -16 -20   2 12.5937 5.43268   4 
 -16 -20   2 -19.795 9.52889   2 
  16  20  -2 4.95977 6.65623   3 
 -16  20   2 8.30916 9.62750   2 
 -16  20   2 23.8496 7.50938   2 
 -16  20   2 -0.8806 7.56118   3 
 -14 -20   2 84.6785 10.9709   2 
 -14 -20   2 57.0191 6.03488   4 
 -14  20   2 36.1233 9.33047   3 
  14  20  -2 77.7316 8.38807   3 
 -14  20   2 50.3991 8.37481   3 
 -14  20   2 53.6399 7.58162   2 
 -14  20   2 58.8538 9.12083   2 
 -12 -20   2 22.2355 7.22309   3 
 -12 -20   2 41.6976 9.09455   2 
 -12 -20   2 36.2312 4.69096   4 
 -12  20   2 40.1935 6.05834   2 
 -12  20   2 41.1735 7.31610   2 
 -12  20   2 46.3181 7.28540   3 
 -12  20   2 33.2649 8.65247   3 
  12  20  -2 40.3209 6.56166   3 
  12  20  -2 47.4029 10.1629   2 
 -10 -20   2 20.9882 7.19375   2 
 -10 -20   2 30.8592 6.90020   3 
 -10 -20   2 22.1111 3.64269   4 
 -10  20   2 25.5734 4.94217   2 
  10  20  -2 25.0024 8.19231   2 
 -10  20   2 26.2914 5.93215   3 
  10  20  -2 31.5883 5.38486   3 
  -8 -20   2 27.7792 6.71835   2 
  -8 -20   2 30.3068 3.80401   4 
   8 -20  -2 35.4916 3.66228   4 
  -8 -20   2 28.2347 6.22899   3 
  -8  20   2 45.0112 9.10761   3 
  -8  20   2 34.5059 5.68369   2 
   8  20  -2 37.9971 7.78119   2 
   8  20  -2 35.0858 5.53196   3 
  -6 -20   2 83.1024 8.48976   3 
  -6 -20   2 72.3145 5.04265   4 
  -6 -20   2 81.4652 8.50612   2 
   6 -20  -2 72.8864 5.46579   4 
   6  20  -2 77.0109 6.68083   3 
  -6  20   2 66.9004 6.64169   2 
   6  20  -2 76.5902 9.01012   2 
  -6  20   2 60.4682 6.37547   3 
  -6  20   2 62.3968 3.28617   4 
   4 -20  -2 20.7279 3.34548   4 
  -4 -20   2 18.6003 5.58576   2 
  -4 -20   2 21.9219 5.15655   3 
   4 -20  -2 16.1440 3.62122   2 
   4 -20  -2 14.5879 5.46738   3 
   4  20  -2 13.0059 3.77091   3 
  -4  20   2 19.8909 2.10041   4 
  -4  20   2 11.1421 4.28285   3 
   4  20  -2 19.4672 6.07303   2 
  -4  20   2 14.1921 4.50916   2 
  -2 -20   2 26.6768 5.08278   3 
   2 -20  -2 21.6550 5.26271   3 
   2 -20  -2 25.5952 4.38505   2 
  -2 -20   2 22.8647 2.89208   4 
  -2 -20   2 18.4714 5.56611   2 
   2 -20  -2 28.2859 3.71699   4 
  -2  20   2 25.7105 2.86143   4 
  -2  20   2 29.6025 4.74654   2 
   2  20  -2 27.5714 6.30147   2 
  -2  20   2 26.5266 4.85492   3 
   2  20  -2 27.4692 4.49173   3 
   0 -20   2 191.539 6.68650   4 
   0 -20   2 196.931 11.1804   2 
   0 -20   2 208.794 10.3266   3 
   0 -20  -2 193.246 9.39578   2 
   0 -20  -2 185.077 11.0278   3 
   0 -20  -2 181.804 8.19851   4 
   0  20   2 191.113 6.44041   4 
   0  20   2 191.996 9.55339   2 
   0  20  -2 186.829 8.94108   3 
   0  20  -2 181.975 11.8283   2 
   0  20   2 200.209 9.92871   3 
   2 -20   2 135.198 9.65336   2 
  -2 -20  -2 125.650 9.90646   3 
  -2 -20  -2 117.358 8.46102   2 
   2 -20   2 120.649 8.54636   3 
  -2 -20  -2 122.192 7.35502   4 
   2 -20   2 122.804 5.12049   4 
   2  20   2 121.197 8.74325   2 
   2  20   2 127.422 5.21388   4 
  -2  20  -2 116.832 10.6957   2 
   2  20   2 122.803 8.43181   3 
  -2  20  -2 119.042 7.69558   3 
   4 -20   2 78.1641 8.43847   2 
  -4 -20  -2 73.9531 7.41583   2 
   4 -20   2 72.5293 4.04788   4 
  -4 -20  -2 80.1882 9.10680   3 
  -4 -20  -2 76.2350 6.75515   4 
   4  20   2 75.9442 4.61709   4 
  -4  20  -2 63.1150 8.09851   2 
  -4  20  -2 87.7606 6.76952   3 
   4  20   2 71.9588 7.13734   2 
   4  20   2 72.1629 7.47994   3 
  -6 -20  -2 4.75354 3.53999   4 
  -6 -20  -2 0.88768 4.90360   2 
   6 -20   2 4.96468 4.35749   2 
   6 -20   2 4.75066 3.87714   4 
   6 -20   2 8.40250 2.09397   4 
  -6 -20  -2 3.03158 5.00625   3 
  -6  20  -2 7.52949 3.79529   3 
   6  20   2 11.2942 2.38805   4 
   6  20   2 9.55630 5.36225   2 
   6  20   2 10.5823 4.10768   3 
  -6  20  -2 17.4187 6.45273   2 
  -8 -20  -2 65.7372 7.75478   3 
  -8 -20  -2 85.2214 7.56003   4 
  -8 -20  -2 79.6268 8.13737   2 
   8  20   2 80.3162 5.04814   4 
   8  20   2 81.5561 8.45001   3 
  -8  20  -2 66.1294 8.56075   2 
  -8  20  -2 83.5165 7.48973   3 
   8  20   2 62.1298 7.59076   2 
 -10 -20  -2 15.4675 4.82866   4 
 -10 -20  -2 12.6117 6.72061   3 
 -10 -20  -2 25.9799 6.89738   2 
 -10  20  -2 5.13085 5.54920   3 
  10  20   2 12.3541 5.01022   3 
  10  20   2 2.33784 6.58396   2 
 -10  20  -2 17.8869 4.84682   3 
  10  20   2 16.6657 3.15782   4 
 -10  20  -2 21.9843 7.98073   2 
 -12 -20  -2 63.5063 9.39604   2 
 -12 -20  -2 79.9312 9.54127   4 
 -12  20  -2 78.7031 8.84797   3 
  12  20   2 76.2980 6.00436   4 
  12  20   2 81.9168 10.1307   2 
 -12  20  -2 77.0598 7.75103   3 
 -12  20  -2 69.8484 10.9675   2 
  12  20   2 77.8406 8.32960   3 
 -14 -20  -2 52.2138 7.63617   4 
 -14 -20  -2 42.1274 9.61303   2 
 -14  20  -2 37.1573 11.1390   2 
 -14  20  -2 35.2723 8.18925   3 
 -14  20  -2 53.0158 8.65821   2 
  14  20   2 36.8956 9.34517   2 
 -14  20  -2 23.1404 6.59883   3 
  14  20   2 26.2279 6.94385   3 
  14  20   2 32.6705 4.43798   4 
 -15 -21   2 2.21666 5.37727   4 
 -15 -21   2 12.0837 9.62932   2 
  15  21  -2 5.23136 6.32681   3 
 -15  21   2 7.93885 9.82138   2 
 -15  21   2 -0.1965 7.44894   3 
 -15  21   2 -10.279 6.55915   2 
 -13 -21   2 9.05266 8.70549   2 
 -13 -21   2 6.58433 4.40834   4 
 -13  21   2 10.4843 7.74643   2 
 -13  21   2 3.06728 6.70892   3 
 -13  21   2 -1.7427 7.92498   3 
 -13  21   2 7.15883 5.45316   2 
  13  21  -2 9.47820 5.52858   3 
 -11 -21   2 19.2885 8.07748   2 
 -11 -21   2 9.14825 7.12631   3 
 -11 -21   2 12.0324 4.06773   4 
  11  21  -2 1.40584 8.69967   2 
 -11  21   2 -1.7398 7.70155   3 
 -11  21   2 2.18791 6.49571   2 
 -11  21   2 10.0316 4.88064   2 
  11  21  -2 8.35031 4.94199   3 
 -11  21   2 5.47536 5.78430   3 
  -9 -21   2 53.8666 5.92978   4 
  -9 -21   2 67.4844 9.33184   2 
  -9 -21   2 58.8335 8.40449   3 
   9  21  -2 62.4204 9.12707   2 
  -9  21   2 46.3837 7.14126   3 
   9  21  -2 60.6852 6.63579   3 
   7 -21  -2 6.51062 2.93260   4 
  -7 -21   2 13.6019 5.80959   3 
  -7 -21   2 18.8596 7.88064   2 
  -7 -21   2 8.26576 2.97589   4 
  -7  21   2 5.92823 4.81572   2 
  -7  21   2 12.8192 4.94534   3 
   7  21  -2 5.04780 6.60305   2 
   7  21  -2 8.39745 6.59931   3 
  -5 -21   2 18.1932 5.47208   3 
  -5 -21   2 8.81578 5.90767   2 
  -5 -21   2 3.55084 2.72163   4 
   5 -21  -2 1.69895 2.95416   4 
  -5  21   2 11.9966 4.61629   2 
   5  21  -2 8.56061 6.15214   2 
  -5  21   2 13.7179 5.59586   3 
   5  21  -2 8.03038 3.67787   3 
  -5  21   2 7.77665 1.83845   4 
  -3 -21   2 -3.6292 4.54440   3 
  -3 -21   2 -8.3515 4.80625   2 
   3 -21  -2 -1.9122 3.46549   2 
   3 -21  -2 4.03975 2.96612   4 
  -3 -21   2 2.87734 2.55856   4 
   3 -21  -2 5.62136 5.09246   3 
   3  21  -2 -1.0621 5.53440   2 
   3  21  -2 0.46051 3.26257   3 
  -3  21   2 0.35085 3.88830   2 
  -3  21   2 1.64738 1.59748   4 
  -3  21   2 3.11323 4.23828   3 
   1 -21  -2 15.0350 3.50199   4 
  -1 -21   2 12.6078 2.48961   4 
  -1 -21   2 22.3462 5.73640   2 
  -1 -21   2 12.7224 4.87612   3 
   1 -21  -2 9.40760 4.25253   2 
   1 -21  -2 18.6990 5.79919   3 
   1  21  -2 11.0128 6.02508   2 
   1  21  -2 14.2543 3.98112   3 
  -1  21   2 2.51279 4.38713   2 
  -1  21   2 12.1662 2.15421   4 
  -1  21   2 4.83226 4.28543   3 
   1 -21   2 2.59058 4.64414   3 
   1 -21   2 4.06171 2.00887   4 
  -1 -21  -2 -1.3045 4.00718   2 
  -1 -21  -2 -3.3302 4.75751   3 
   1 -21   2 5.33559 4.79704   2 
   1  21   2 6.36898 4.26078   3 
   1  21   2 -0.7851 1.77069   4 
  -1  21  -2 -1.6026 3.29792   3 
   1  21   2 0.99663 4.29446   2 
  -1  21  -2 -1.1453 5.85838   2 
   3 -21   2 40.3273 3.71580   4 
   3 -21   2 41.6666 6.21466   2 
  -3 -21  -2 47.1898 6.90177   3 
  -3 -21  -2 41.9616 6.09671   2 
   3 -21   2 45.1540 6.18625   3 
  -3  21  -2 44.2251 5.05375   3 
   3  21   2 38.1101 3.92405   4 
   3  21   2 46.8412 6.43876   3 
   3  21   2 41.6658 5.75118   2 
  -3  21  -2 36.4241 7.21699   2 
  -5 -21  -2 30.9964 4.76640   4 
  -5 -21  -2 39.1219 6.44324   2 
   5 -21   2 40.9728 6.47906   2 
   5 -21   2 41.9894 3.75958   4 
  -5 -21  -2 33.8895 6.99852   3 
   5  21   2 48.2130 6.86336   2 
  -5  21  -2 43.9147 5.32521   3 
  -5  21  -2 46.3623 7.72266   2 
   5  21   2 37.5870 5.90337   3 
  -7 -21  -2 6.18247 6.21688   3 
  -7 -21  -2 -5.2966 5.29121   2 
  -7 -21  -2 -3.3203 3.95588   4 
   7  21   2 5.44589 4.21529   3 
  -7  21  -2 4.58191 6.90416   2 
   7  21   2 -2.3277 5.50019   2 
  -7  21  -2 1.90434 4.15040   3 
   7  21   2 2.91284 2.18016   4 
  -9 -21  -2 9.48511 4.77171   4 
  -9 -21  -2 -0.1314 6.05938   2 
  -9 -21  -2 16.2836 7.03782   3 
  -9  21  -2 27.0785 8.02680   2 
  -9  21  -2 5.55360 4.31402   3 
   9  21   2 2.04840 2.47056   4 
   9  21   2 -0.6758 6.55629   2 
  -9  21  -2 5.50707 6.01711   3 
   9  21   2 -0.1518 4.76204   3 
 -11 -21  -2 -1.6030 5.21677   4 
 -11 -21  -2 0.66041 7.18048   2 
  11  21   2 1.67999 7.65387   2 
  11  21   2 7.27336 5.85723   3 
 -11  21  -2 -11.866 6.10006   3 
  11  21   2 1.43836 2.65334   4 
 -11  21  -2 -7.9157 8.79011   2 
 -11  21  -2 -7.6713 4.58536   3 
 -13 -21  -2 31.6768 9.77040   2 
 -13 -21  -2 24.0793 12.0430   4 
  13  21   2 9.51632 8.81285   2 
 -13  21  -2 17.0100 7.80760   3 
 -13  21  -2 29.5479 6.59153   3 
 -13  21  -2 6.72489 10.4997   2 
  13  21   2 17.4425 3.82500   4 
  13  21   2 12.3454 6.28433   3 
 -13  21  -2 4.75209 6.97473   2 
 -14 -22   2 32.7844 6.16516   4 
 -14 -22   2 36.2871 11.1564   2 
 -14  22   2 25.2248 6.99719   2 
  14  22  -2 28.5977 6.90528   3 
 -14  22   2 4.26597 7.46765   3 
 -14  22   2 22.4448 10.0510   2 
 -12 -22   2 102.025 8.63230   4 
 -12 -22   2 91.6062 12.0746   2 
  12  22  -2 81.8827 8.63864   3 
 -12  22   2 95.8588 10.1514   3 
 -12  22   2 83.5513 10.0766   2 
 -12  22   2 80.4676 9.93993   2 
 -12  22   2 71.4715 10.8873   3
[truncated: 1,292,971 more chars]
